# Supplementary material for: Integrative Analysis of Metabolome and Transcriptome Identifies Potential Genes Involved in the Flavonoid Biosynthesis in Entada phaseoloides Stem
Source: Front Plant Sci. 2022 May 10;13:792674. doi: 10.3389/fpls.2022.792674 (PMC9127681; doi:10.3389/fpls.2022.792674)
Supplement: Supplementary file 6 [file Data_Sheet_1.xlsx]

## Sheet: Table S1
Table S1. Type and relative content of flavonoids in different stems
Compounds	KEGG.ID	Formula	Score	Fragmentation.Score	Mass.Error..ppm.	Isotope.Similarity	Sub.class	Pathway	S1_1	S1_2	S1_3	S1_4	S1_5	S1_6	S2_1	S2_2	S2_3	S2_4	S2_5	S2_6	S3_1	S3_2	S3_3	S3_4	S3_5	S3_6
Acacetin	C01470	C16H12O5	34.9 (verified by authentic standard)	66.4	-4.08974	13.0032	Flavones (31)	map00944 Flavone and flavonol biosynthesis;	1.16093e+06	447617	1.03493e+06	499116	939489	1.13458e+06	637334	87117.2	979046	628441	642199	745298	30996.3	2218	52142.6	31939.9	45771.1	42718.7
Isoorientin	C01821	C21H20O11	33.5	17	1.94923	52.7392		-	292881	304209	270807	327279	312119	285796	278281	317956	280151	235434	246777	244731	1.30666e+06	471424	340571	530199	805149	309037
Luteolin 7-O-glucuronide	C03515	C21H18O12	38.1	0	-2.94984	94.1046		map00944 Flavone and flavonol biosynthesis;	333764	112977	277111	180256	283677	429565	110439	14011.2	204380	120952	135966	211098	18381.4	14763.3	15610.1	13144.6	25920.7	23912.5
Chrysoeriol	C04293	C16H12O6	49.7	51.1	0.361246	98.0626		map00944 Flavone and flavonol biosynthesis;	3.3825e+07	1.96112e+07	4.38005e+07	1.82524e+07	2.13448e+07	3.11859e+07	5.62226e+07	3.19143e+06	3.34419e+07	4.87944e+07	1.15647e+08	2.51726e+07	1.72364e+07	7.44896e+06	6.34741e+06	8.28219e+06	1.42123e+07	7.05574e+06
Apigenin 7-O-beta-D-glucoside	C04608	C21H20O10	37.2	23.8	8.46874	71.7709		map00944 Flavone and flavonol biosynthesis;	65210.5	53867.2	70702.9	81271.4	61640.7	82145	80673.4	78332	60763.9	80318	53674	66553.2	59514.4	73430.8	57641.9	70300.3	62893.2	47854.9
Apiin	C04858	C26H28O14	44.9	42	9.22708	92.6258		map00944 Flavone and flavonol biosynthesis;	13685.7	24684.2	28042.9	31200.1	20257.5	25529.4	20754.9	43399.3	40154.1	14171.1	31517.7	24639.6	154061	119824	80287.9	86326.7	121058	86038.1
Luteolin 7-O-[beta-D-glucuronosyl-(1->2)-beta-D-glucuronide]-4'-O-beta-D-glucuronide	C04900	C33H34O24	34.9	0.481	-6.92255	81.8839		map00944 Flavone and flavonol biosynthesis;	241203	276057	202872	248670	245520	215087	191223	371813	261967	219727	187023	250557	182176	147326	92976.9	114064	170510	108621
Malonylapiin	C05622	C29H30O17	44.2	39.8	-3.43592	85.2087		map00944 Flavone and flavonol biosynthesis;	391401	402888	483590	456982	393090	437223	425778	344932	504195	437604	452662	398582	2.68482e+06	2.70725e+06	1.37727e+06	2.28377e+06	2.12182e+06	1.9812e+06
Apigenin 7,4'-dimethyl ether	C10019	C17H14O5	54.2	94.9	-4.69751	81.6472		-	21963.3	7689.19	12709.9	19617.5	12403.4	19681	19001	28142.5	9665.14	16746.5	6121.64	11861.5	4107.26	5131.91	4528.48	4340.82	8459.86	1389.05
Baicalein 5,6,7-trimethyl ether	C10024	C18H16O5	47	48.7	-2.95555	89.6474		-	456560	773184	429227	901015	661386	480883	706993	1.26123e+06	551468	732123	356311	615353	439691	804102	547081	705262	681401	515666
Dasytrichone	C10035	C18H16O4	49.5	55	-2.81404	95.749		-	368988	425203	261692	382584	247091	220990	398513	467168	504899	453563	326967	290163	607688	692374	444916	569778	349786	341501
Diosmin	C10039	C28H32O15	38.1	0.0913	1.74839	92.3818		-	125331	44141.5	120938	56957.1	62698.3	87503.6	72839	15994.1	121837	68799.2	89971.5	73066	149983	68274	30706.8	73433.2	69982.1	48920.3
Eupatilin	C10040	C18H16O7	48.5	50.2	-1.2548	93.9824		-	15325.6	13928	13974.8	15031.7	17684.2	16685.5	13753.1	7111.54	15306	11970.7	18661.7	19167.7	15848.7	14567.7	16120.5	16878.1	19117.3	19896.2
Geraldone	C10047	C16H12O5	44.5	33.8	1.18532	89.9436		-	212915	234344	251940	226346	168494	225151	204898	217609	259841	232513	199977	213666	360058	277448	284873	282919	294515	256806
Hypolaetin	C10078	C15H10O7	38.8	4.33	-1.85173	92.0778		-	2822.01	9358.15	2453.42	6647.76	7577.35	6439.12	18907.1	9604.57	63927.7	34345.2	93318.2	105412	4335.52	6492.49	1962.96	152.988	1902.09	686.426
Lucenin-2	C10102	C27H30O16	47.4	41.6	-1.33036	96.9125		-	1.06559e+07	7.20045e+06	1.08421e+07	7.85635e+06	1.12866e+07	1.18475e+07	7.984e+06	4.70123e+06	9.86929e+06	9.03595e+06	7.23669e+06	8.95211e+06	6.29814e+07	4.97538e+07	2.79126e+07	5.77466e+07	6.20471e+07	4.01814e+07
Luteolin 7-O-(6''-malonylglucoside)	C10103	C24H22O14	40.2	9.28	4.08492	96.7143		-	1.40339e+06	789892	1.66115e+06	928093	1.32471e+06	1.70294e+06	1.22391e+06	168166	1.20551e+06	1.51079e+06	1.6195e+06	1.01657e+06	1.17339e+06	805956	340879	765531	922815	560352
6-Methoxyluteolin 7-rhamnoside	C10104	C22H22O11	50.3	60	-2.6351	94.6774		-	496953	449493	501740	477688	491200	549816	474303	429744	544725	426445	433578	473395	5.19145e+06	3.88169e+06	1.85915e+06	3.30631e+06	4.47897e+06	2.83698e+06
Neocarlinoside	C10109	C26H28O15	40.7	10.9	-0.80682	93.3643		-	708857	615010	733431	525326	643206	636004	669545	183022	824212	587489	860922	644201	610601	492812	424253	508868	495940	566674
Primetin	C10121	C15H10O4	39.2	5.48	-3.97146	95.2475		-	689.863	3654.72	13849.5	6196.61	2172.69	1869.73	3409.7	8050.69	2120.03	1689.54	392.456	3259.29	522.842	412.95	521.266	1320.69	164.01	6938.81
Scullcapflavone II	C10183	C19H18O8	34.2	43.3	7.23645	35.9963		-	20691.7	60374.9	96328.2	18077.9	18831.4	22492.3	23328.8	22331	15233.2	28388.6	45408.9	15972.3	25611.9	26719.4	22048.5	15915.5	35359.8	22345.1
Scutellarein	C10184	C15H10O6	45.3	39.5	-3.44246	91.0668		-	39000	60434.5	34719.8	51714.7	40304.2	37158.3	30426.8	47577.4	33420.7	20372.6	44780.2	30291.7	25290.7	15685.5	19162.7	15509.7	15428	20469.7
Tricetin	C10192	C15H10O7	35.5	0	-1.2976	79.2736		map00941 Flavonoid biosynthesis;	243277	164952	281509	182554	207981	252439	305427	53733.1	247809	298764	328800	171397	872530	636890	358761	630237	733251	485277
Tectochrysin	C11621	C16H12O4	41.1	11	-1.78212	96.7325		-	7842.05	6144.42	10278.5	6048.39	6828.76	10334.7	10540.6	6899.99	8322.12	8219.46	15915.9	8534.43	12386.5	6580.37	8108.02	7598.26	6370.7	9938.81
Vitexin 2''-O-beta-L-rhamnoside	C12628	C27H30O14	39.1	11	-5.38716	90.6999		map00944 Flavone and flavonol biosynthesis;	134207	150131	94429.7	146405	144873	123289	84610.9	95437.1	132021	85781.7	117972	176291	299867	229150	352972	326441	295386	366054
Isoswertisin 2''-rhamnoside	C12629	C28H32O14	49.1	61.7	6.63418	91.4946		map00944 Flavone and flavonol biosynthesis;	15104	16386	15643.7	23690.9	12971.8	40586.4	10060.1	423364	7990.79	14800.2	30653.6	12686.9	145138	21906.6	5956.17	16995.1	118368	12945
2-(3,4,5-Trimethoxyphenyl)-5,6,7,8-tetramethoxy-4H-1-benzopyran-4-one	C14953	C22H24O9	38.4	17.8	3.93435	78.649		-	599660	700518	562947	845249	676244	623989	557849	751037	740310	479919	688630	798054	807730	917442	1.19815e+06	932561	833083	1.1596e+06
6-Hydroxy-2-(4-methoxyphenyl)-5,7-dimethoxy-4H-1-benzopyran-4-one (6-Hydroxy-4',5,7-trimethoxyflavone)	C14985	C18H16O6	38.4	5.56	4.63348	91.7873		-	85498.8	90429.4	42078.6	49533.4	43002.8	42178.9	77045.1	84851.7	42598.9	45350.3	47196.2	37038.1	86169.1	109927	51657.8	33261.1	39645.2	78264.4
Nortangeretin	C15031	C15H10O7	39.9	0.37	0.269319	99.2757		-	1.78568e+07	1.03044e+07	2.09232e+07	1.33643e+07	1.68341e+07	2.17397e+07	1.09265e+07	1.66461e+06	1.54128e+07	1.23358e+07	1.53442e+07	1.2142e+07	1.72363e+08	1.25398e+08	6.08302e+07	1.27664e+08	1.4504e+08	9.08461e+07
Gardenin B	C15109	C19H18O7	38.2	0	-1.89739	93.1686		-	48954	39529.2	56034.4	46174.1	42896	36820.7	65159.5	46473	57073.7	58359.7	39680.1	40483.6	21085.2	24748.2	28068.2	23646	15636.5	27936.9
Morusinol	C17868	C25H26O7	42.3	31.7	9.16277	89.8273		-	148180	145447	234657	190718	186402	211267	212490	76533.3	201533	262597	187877	184320	82332.6	49712.8	64583.9	49911.4	74287.7	67912.6
Quercitrin	C01750	C21H20O11	48	41.5	-0.674571	99.3613	Flavonols (25)	map00944 Flavone and flavonol biosynthesis;	1.05945e+08	8.60008e+07	9.48633e+07	9.31551e+07	9.79489e+07	1.00311e+08	7.93572e+07	1.55498e+07	1.0569e+08	8.36771e+07	1.01716e+08	9.4533e+07	1.14315e+07	8.11174e+06	1.40712e+07	1.07076e+07	1.32905e+07	1.30442e+07
8-Hydroxykaempferol	C02806	C15H10O7	49	46.2	0.377581	99.4878		-	9.32178e+07	6.46175e+07	9.07063e+07	7.47529e+07	7.704e+07	8.56205e+07	6.43501e+07	4.95824e+06	8.80355e+07	7.05185e+07	7.55688e+07	6.33378e+07	7.65546e+06	4.01189e+06	6.58869e+06	6.26823e+06	6.35976e+06	6.39105e+06
3-O-Methylquercetin	C04443	C16H12O7	46.6	44.1	2.55516	92.0354		map00944 Flavone and flavonol biosynthesis;	224601	146626	232274	139713	193256	213083	224178	93122.2	154983	217653	119422	138903	610334	379991	249274	424983	505240	240377
Quercetin 3-O-glucoside	C05623	C21H20O12	39.3	0.595	-1.62402	97.7914		map00944 Flavone and flavonol biosynthesis; map01100 Metabolic pathways; map01110 Biosynthesis of secondary metabolites;	414376	289082	446010	429075	394658	436443	298423	55273.1	354539	243978	276414	310433	1.8062e+06	1.25388e+06	928204	1.33371e+06	1.67934e+06	1.04944e+06
Rutin	C05625	C27H30O16	46.4 (verified by authentic standard)	36.9	0.777476	96.3019		map00944 Flavone and flavonol biosynthesis; map01100 Metabolic pathways; map01110 Biosynthesis of secondary metabolites;	1.14031e+06	821158	1.3905e+06	1.04443e+06	1.209e+06	1.37056e+06	1.21519e+06	586011	1.3167e+06	1.35432e+06	1.0927e+06	1.05187e+06	1.46405e+07	1.24188e+07	5.27513e+06	1.19377e+07	1.19216e+07	8.54136e+06
3-Methoxyapigenin	C05902	C16H12O6	48.7	53.8	5.20846	95.4844		-	255810	328489	200491	354960	274637	245703	192572	161283	317620	188935	674102	384010	794751	522003	569740	585059	701484	710738
Chrysosplenetin	C10030	C19H18O8	46.6	43.2	-2.869	93.3414		-	3108.22	5464.72	2816.45	3604.39	4136.21	3138.54	3943.02	9525.77	1989.38	3857.89	1609.76	1962.49	1266.81	2236.76	1384.1	1336.59	907.211	1207.02
Datiscetin	C10036	C15H10O6	44.4	35.9	-1.85669	88.2061		-	55999.2	44862.3	73591.1	51752.3	40999.8	49746.8	74113.5	17697	56318.4	75263.9	141475	42419.4	29352.8	25314.3	20011.9	22465.8	27462.8	22320.5
Fisetin	C10041	C15H10O6	45.5	37.6	5.16409	95.9397		-	112725	87468.5	107303	140770	109916	118268	100865	80559.8	114791	116444	151143	108347	191329	129383	131932	142007	145444	151331
6-Hydroxykaempferol	C10068	C15H10O7	33.5	1.48	-6.95601	74.0021		-	126622	107336	152618	150493	138050	134898	106447	144975	137517	140933	154181	122034	224871	170224	190404	197277	205117	175572
Myricitrin	C10108	C21H20O12	39.5 (verified by authentic standard)	0	-0.539583	97.9261		-	4.13615e+06	3.44582e+06	5.45162e+06	4.01773e+06	4.33918e+06	4.35132e+06	3.14205e+06	1.53359e+06	4.54307e+06	3.64794e+06	4.83463e+06	3.71063e+06	4.53568e+07	4.18809e+07	2.37973e+07	4.09945e+07	3.97526e+07	3.20046e+07
Oxyanin B	C10116	C18H16O8	38.2	17.4	-3.01546	77.1209		-	153619	126523	151852	159933	162925	144343	128053	170340	157462	122922	105872	155567	153505	146621	124731	134071	138251	107826
Patuletin	C10118	C16H12O8	38.6	0	-0.949408	93.9873		-	294092	372202	308667	311014	286115	278515	310567	509614	446887	317362	368895	488888	165115	237430	387682	207089	184451	319371
Quercetagetin	C10122	C15H10O8	37.2	0	3.96684	90.4121		-	46833.8	43157.2	57658.2	40014.4	43885.8	52637.6	26480.2	38697.9	33981.2	27711.2	14141.3	44807.2	24443.7	37749.6	38993.7	30457.6	29708.2	33877.9
Quercetin 3-(2G-xylosylrutinoside)	C10175	C32H38O20	45.3	41.8	3.63196	88.8142		map00944 Flavone and flavonol biosynthesis;	262763	262044	299293	294296	267357	264551	276241	356118	288142	275565	247342	266689	363454	420106	393871	415061	458933	338018
Robinetin	C10177	C15H10O7	41.6	27.3	-1.21993	82.2668		-	38598.9	37600.6	55284.2	38733.7	35202.5	45012.9	46323.6	17231.3	54796.7	48976.8	52819.1	42245.8	278604	176929	97185.7	197558	220503	137541
Robinin	C10178	C33H40O19	39.3	4.39	-2.132	94.5601		-	2.64227e+06	1.55942e+06	2.7832e+06	2.12622e+06	2.48326e+06	3.35563e+06	2.09146e+06	1.30429e+06	2.65569e+06	2.08567e+06	2.24226e+06	2.54881e+06	3.82628e+06	3.36449e+06	1.97162e+06	3.26262e+06	3.97799e+06	2.52145e+06
Santin	C10180	C18H16O7	37.9	0	-2.707	92.5067		-	87002.5	65257.3	51335.5	58984.3	63160.8	53970	104520	51964.2	100519	65359.8	155826	130716	3226.65	24175.5	69960.3	20579.9	13155.6	43427.6
Sexangularetin	C10185	C16H12O7	41.2	9.62	0.878972	97.2881		-	119339	92746.3	56289	67438.5	76074.9	77370.7	71000.3	79373.9	36704.2	38559.6	75308.1	17758.7	41259.5	8264.96	16294.8	16186.8	15124.8	8811.69
Tamarixetin	C10188	C16H12O7	39.8	0	-0.360162	99.6768		-	1.08825e+06	923535	1.42739e+06	873699	962625	1.36617e+06	1.25585e+06	83156.2	983484	1.33933e+06	1.11034e+06	758859	227963	130181	123097	165491	175475	135129
8-(1,1-DMA)kaempferide	C11580	C21H20O6	40.1	27.6	9.91216	83.7076		-	5743.71	3509.2	2604.92	2673.43	4448.02	4980.89	2549.07	744.669	1563.38	4120.02	109.461	1886.69	6240.62	7378.5	35.5565	4864.01	6543.78	1593.62
Kaempferol 3-sophorotrioside	C12635	C33H40O21	42	19.1	-2.41145	93.8238		map00944 Flavone and flavonol biosynthesis;	1.39625e+06	670408	1.46149e+06	553002	1.16293e+06	1.49747e+06	985890	462528	636705	1.00038e+06	191066	573346	2.69633e+06	1.79551e+06	872485	2.15788e+06	2.55191e+06	889186
Quercetin 3-O-(6-O-malonyl-beta-D-glucoside)	C12638	C24H22O15	40	3.93	-2.36069	98.6801		map00944 Flavone and flavonol biosynthesis;	636947	406950	727245	538030	598742	645321	481092	55813.9	504917	497759	442213	385869	2.81699e+06	2.44623e+06	1.11371e+06	2.08483e+06	2.24015e+06	1.55049e+06
Quercetin 3-O-beta-D-glucosyl-(1->2)-beta-D-glucoside	C12667	C27H30O17	37.4	22	-3.37324	69.1143		map00944 Flavone and flavonol biosynthesis;	266282	312752	228786	323045	256877	251334	220950	321531	302432	226801	197928	284959	202011	291111	183698	187040	190311	209136
Kaempferol 3-O-beta-D-glucosylgalactoside	C16490	C27H30O16	38	11.3	6.60213	86.4389		map00944 Flavone and flavonol biosynthesis;	3.61971e+06	1.52343e+06	2.81614e+06	1.49589e+06	4.25808e+06	4.16425e+06	1.42689e+06	1.11891e+06	1.88986e+06	1.50711e+06	1.1967e+06	1.69659e+06	706312	676748	576585	695224	698109	568530
Cyanidin 3-O-rutinoside	C08620	C27H31O15	34.5	8.77	-7.46061	71.8712	Anthocyanins (19)	map00942 Anthocyanin biosynthesis;	137605	180946	101241	136067	158278	132341	117556	91542.7	142066	107769	97074.4	105245	57234.6	68891.8	104336	70812.2	84697.4	127657
Cyanidin 3,5,3'-tri-O-glucoside	C08629	C33H41O21	38.3	47.4	-5.72315	50.6404		-	1.82102e+06	1.43712e+06	1.74538e+06	1.50071e+06	1.58632e+06	1.93229e+06	1.69688e+06	1.97088e+06	1.40159e+06	1.57336e+06	756774	1.46799e+06	1.81216e+06	2.16301e+06	1.11543e+06	1.82667e+06	2.33344e+06	1.39206e+06
Malvin	C08718	C29H35O17	37	2.62	-6.93373	90.3538		-	211549	352560	251261	241078	283262	197537	452541	317242	379192	387056	368697	458861	160778	131124	140272	113655	150541	155954
Cyanidin 3-O-(6-O-p-coumaroyl)glucoside	C12095	C30H27O13	39	10.8	-9.55765	94.557		map00942 Anthocyanin biosynthesis;	10538.6	4345.61	17714.4	2789.26	7085.22	11085.9	6321.01	950.983	12664.3	3650.23	14145.1	5127.32	240946	187727	306536	304430	223436	245964
Pelargonidin 3-O-glucoside	C12137	C21H21O10	37.6	6.19	-6.78	89.6277		map00942 Anthocyanin biosynthesis; map01100 Metabolic pathways; map01110 Biosynthesis of secondary metabolites;	25589.2	31242.6	29659	44691	30870.6	34941.3	25934	52976.6	29522.8	29074	41489.6	42772.5	65254.3	54705.3	45007.5	56795.2	58259.7	41504
Petunidin 3-O-glucoside	C12139	C22H23O12	40	16	-5.45081	90.1595		map00942 Anthocyanin biosynthesis;	115697	103070	121176	99721.9	117428	129959	136142	130061	109856	131543	91626	109695	95869.9	60916.9	50809.7	78035.5	76628.2	26466.5
Pelargonidin 3-O-rutinoside	C12644	C27H31O14	35.2	5.08	0.489175	71.624		map00942 Anthocyanin biosynthesis;	75380.1	64723.2	77952.5	64011.1	93141.3	96296.1	68213.9	52799.6	66097	76367.3	107397	82291	94351.5	75854.3	83791.9	81622.1	105638	73524.1
Cyanidin 3-O-rutinoside 5-O-beta-D-glucoside	C12646	C33H41O20	31.8	16.1	-6.05673	49.7439		map00942 Anthocyanin biosynthesis;	167142	181242	214204	194532	251311	241241	181984	163535	254420	191609	398167	311308	258042	189438	272778	241685	338239	216491
Salvianin	C12647	C42H41O24	39.2	8.28	0.931248	89.0511		map00942 Anthocyanin biosynthesis;	320600	790512	328411	948585	599839	502359	301012	518415	1.17187e+06	418497	2.48586e+06	1.23086e+06	2.77428e+06	2.0591e+06	3.35136e+06	2.3811e+06	2.30528e+06	3.3453e+06
Pelargonidin 3-O-3'',6''-O-dimalonylglucoside	C16288	C27H25O16	36.3	0.00285	0.214512	81.9076		map00942 Anthocyanin biosynthesis;	3.10186e+06	1.88033e+06	2.52863e+06	1.93794e+06	2.13091e+06	3.64139e+06	3.34859e+06	1.9166e+06	933719	3.49592e+06	587352	908865	723848	646351	524310	687819	787953	393382
Cyanidin 3-O-3'',6''-O-dimalonylglucoside	C16289	C27H25O17	33.8	3.09	-4.83794	71.3806		map00942 Anthocyanin biosynthesis;	579553	465709	513208	476059	614556	582740	775975	404435	510289	679069	459668	508293	198439	298923	123506	246834	250702	165107
Pelargonidin 3-O-(6-caffeoyl-beta-D-glucoside)	C16297	C30H27O13	51.3	65.3	2.72005	94.6674		map00942 Anthocyanin biosynthesis;	3.38243e+07	3.73509e+07	3.99798e+07	3.44222e+07	3.40008e+07	3.43348e+07	4.06836e+07	1.97098e+07	3.21733e+07	4.60352e+07	2.98516e+07	3.55896e+07	5.05387e+06	7.44657e+06	7.47147e+06	5.57408e+06	5.98468e+06	6.31306e+06
Ternatin C5	C16303	C36H43O25	36.7	0	0.76465	84.5622		map00942 Anthocyanin biosynthesis;	114470	148818	135450	148774	175382	112797	148066	174513	188378	137156	511130	139248	118141	209460	221173	278349	211485	432997
Delphinidin 3-glucoside 5-caffoyl-glucoside	C16313	C36H37O20	35.1	10.5	7.87269	73.6199		map00942 Anthocyanin biosynthesis;	150012	121809	150078	140800	152408	156167	129676	137269	135940	137194	162419	165028	129431	192691	119331	154258	145162	43736.8
Pelargonidin 3-O-beta-D-glucoside 5-O-(6-coumaroyl-beta-D-glucoside)	C16349	C36H37O17	36.5	0	-8.44397	91.9728		map00942 Anthocyanin biosynthesis;	5594.63	7015.92	4595.39	19965.5	1113.2	4286.8	17311.8	13934.5	20901.1	3111.34	13963.8	2452.2	95178.5	83905.6	188955	175601	91776.9	128931
Delphinidin 3-O-(6-caffeoyl-beta-D-glucoside)	C16367	C30H27O15	37.9	0	1.72564	91.4662		map00942 Anthocyanin biosynthesis;	43547	35821.8	27464.6	49552	50419.5	54846.5	42012.6	32970.2	38125.9	45434.7	48816.6	41286.6	72562.8	60577.1	61707.9	53426.3	47678	41669.3
Cyanidin 3-(6-p-caffeoyl)glucoside	C16369	C30H27O14	40.4	8.34	0.0328056	93.5803		map00942 Anthocyanin biosynthesis;	895378	1.09023e+06	1.09127e+06	1.08718e+06	977386	888113	1.41645e+06	835230	1.72325e+06	1.84348e+06	4.26346e+06	1.49917e+06	630996	755892	659017	550896	591051	622627
Delphinidin 3-(6-p-coumaroyl)glucoside	C16370	C30H27O14	50.3	58.2	3.62555	97.3268		map00942 Anthocyanin biosynthesis;	342381	410553	368135	402495	359138	382957	458061	289963	451673	391321	425692	437650	172639	178997	56104.9	192320	147364	68776.8
Cyanidin 3-glucoside 5-caffeoylglucoside	C16372	C36H37O19	37.9	16.4	-5.96685	79.9363		map00942 Anthocyanin biosynthesis;	131707	159051	166353	110066	137313	141128	175209	173427	189777	221958	147966	224897	50477.6	32675.4	36265	36865.5	44517.4	53360
Bowdichione	C10202	C16H10O6	45.4	47.5	1.79987	81.6104	Isoflavones (18)	-	350382	454637	323461	469445	368644	365486	301531	357188	442159	320009	569018	473069	800109	655756	641475	605357	697493	657898
Genistein 8-C-glucoside	C10420	C21H20O10	41.6	35.3	-4.70241	78.3616		-	53358.5	43655.7	48986.4	34527.7	36863.2	42590.3	53017.3	58326.4	45429.2	34340.5	56323.9	38840.8	315438	190744	177527	173263	229692	183904
Iridin	C10465	C24H26O13	44.5	37.2	-1.56092	87.1425		-	580531	363935	834558	372172	423029	492116	1.12506e+06	157139	572013	959241	975332	446396	791981	585972	461234	600685	748550	500405
Irisolidone	C10471	C17H14O6	38.8	0.735	-3.33622	97.2726		-	91507	36739	165172	48586.2	50768.5	68622.9	456760	88659.3	122679	359385	2.04313e+06	143393	31604.9	17602.5	42611.1	32062.1	54282.7	28996.6
Luteone	C10498	C20H18O6	36.8	10.5	-0.692145	74.1543		-	1.62536e+07	1.84288e+07	1.60732e+07	2.01852e+07	1.78925e+07	1.80537e+07	2.45144e+07	2.43846e+07	1.86577e+07	2.67179e+07	1.32993e+07	1.89539e+07	2.69843e+07	3.04069e+07	2.65362e+07	3.22966e+07	3.06049e+07	2.39704e+07
Ononin	C10509	C22H22O9	48.5	62.2	9.97641	91.4601		map00943 Isoflavonoid biosynthesis;	409388	570868	335042	453975	368265	331169	399530	687560	558658	417896	259268	652400	269459	221256	275324	181493	221808	240492
Pomiferin	C10519	C25H24O6	37.4	5.99	5.85192	87.923		-	58110.5	48330.4	44032.3	53762.3	52042.3	51818.6	50944.7	23100.8	47370.3	31995	28624.7	45062.8	28752.5	31025.5	24074.4	31039.5	30709.1	24012.4
Pseudobaptigenin	C10522	C16H10O5	37.8	0	7.71025	97.4714		map00943 Isoflavonoid biosynthesis; map01110 Biosynthesis of secondary metabolites;	50915.5	53991.6	60770.4	46909.9	48432.4	46243.5	77365.8	79417.2	48731.7	69376.4	71531.6	51067.4	34832.1	39666.5	32816.3	39153.7	28667.7	40354.9
Puerarin	C10524	C21H20O9	38.2	13.4	2.94504	80.8392		-	472281	496663	436623	546704	515734	462243	390791	483373	496681	412402	531082	446556	598952	658183	655084	670032	737695	632334
Sayanedine	C10527	C17H14O5	38.6	25.1	-3.57101	72.345		-	1.44664e+06	1.51118e+06	1.21281e+06	1.75338e+06	1.52111e+06	1.41624e+06	1.75581e+06	1.71604e+06	1.49206e+06	1.82177e+06	1.38256e+06	1.52968e+06	2.47841e+06	2.23064e+06	1.88962e+06	2.23554e+06	2.31596e+06	1.86607e+06
Texasin	C10536	C16H12O5	32.7	11	3.25399	56.2835		-	201571	291411	209413	251722	286239	222757	336981	244746	211284	322960	286679	239067	128717	309435	241982	273235	212265	238304
2'-Hydroxybiochanin A	C12135	C16H12O6	38.3	0	-3.50477	95.5778		map00943 Isoflavonoid biosynthesis;	107431	34599.3	170654	66196.3	59427.3	115221	337033	54046.4	98283.2	245740	440797	58239	266281	110175	70353.5	115991	121230	84203.4
Biochanin A 7-O-(6-O-malonyl-beta-D-glucoside)	C12625	C25H24O13	39	3.14	1.65071	93.9766		map00943 Isoflavonoid biosynthesis;	70670.2	56566.3	36598.9	54994.3	46864.4	75136.5	32120.7	39545	46980.4	18612	36640.8	42133.1	37557.1	15507.6	15167.4	17577.3	18171.6	21466.5
Malonyldaidzin	C16191	C24H22O12	44	33.6	-4.34131	91.6959		map00943 Isoflavonoid biosynthesis;	68259.2	44667.5	23573.2	60691	54904.6	41561.4	31786.8	31341.2	49586.3	22689.9	38135.2	26214.4	332235	256824	120995	207964	203858	145102
Malonylgenistin	C16192	C24H22O13	37.7	0	0.68796	89.2748		map00943 Isoflavonoid biosynthesis;	3866.89	5783.67	5026.33	4064.46	5252.08	4405.07	4690.4	6400.49	6659.8	1989.12	12303.6	4169.6	6027.73	4858.72	4017.83	4465.31	4575.15	4844.83
Glycitin	C16195	C22H22O10	40.2	23.3	9.86497	88.5229		map00943 Isoflavonoid biosynthesis;	71800.1	90624.5	66069.5	83452.2	87429.7	100713	90251.5	179775	98867.9	130012	65825.4	94169	93860.1	69754.7	44849.9	80234.6	150256	56203.7
Malonylglycitin	C16197	C25H24O13	41.9	19	1.50775	92.1194		map00943 Isoflavonoid biosynthesis;	15541.6	7341.14	14779.4	10282	10921.4	10361.8	9102.08	33669.4	14336.7	11700.7	14627.6	5111.47	10766.4	2186.08	5479.41	5186.32	4137.17	3890.33
Formononetin 7-O-glucoside-6''-O-malonate	C16222	C25H24O12	43.6	33.7	4.76212	89.6949		map00943 Isoflavonoid biosynthesis;	7.0364e+06	7.28866e+06	3.6412e+06	9.69298e+06	7.68155e+06	7.07783e+06	6.6629e+06	1.11964e+07	5.13065e+06	5.32108e+06	7.534e+06	4.89602e+06	4.14225e+06	6.93991e+06	8.86524e+06	5.87164e+06	4.40982e+06	5.11782e+06
Isosakuranetin	C05334	C16H14O5	36	41.1	-2.09085	41.5952	Flavanones (12)	map00941 Flavonoid biosynthesis; map01110 Biosynthesis of secondary metabolites;	967747	879176	1.04097e+06	1.10161e+06	1.0368e+06	1.09662e+06	1.32433e+06	834207	1.10039e+06	1.35805e+06	975940	1.06645e+06	724215	708885	602048	728462	769044	596433
Silandrin	C08600	C25H22O9	38.5	18.7	1.33975	75.2561		-	198235	216516	199771	221930	185412	208525	181384	248181	181902	172873	123634	214732	571068	439636	398014	464115	499451	350202
Sophoranone	C08719	C30H36O4	43.7	26.7	-4.18341	96.5592		-	17972.1	18587	26521.5	20892.4	20493.5	20867.2	28999.1	28749.2	19574.8	17949.7	22138.3	19644.1	21147.5	26398.5	24678.1	29132.9	28617.7	32625.6
Lonchocarpol A	C09724	C25H28O5	37.3	0.0246	-0.269658	86.6941		-	423504	397951	336879	366465	314302	298705	388198	474672	387681	284508	402293	364228	306598	361831	326272	281574	327645	348347
Eriocitrin	C09732	C27H32O15	35.6	5.24	-4.1581	77.573		-	86691.6	96721.8	57072.2	56387.4	76004.5	73219.2	70463	90478.4	65881.8	83990.2	155471	77550.1	113042	68901.1	94401.3	86813.8	87642.3	66410.9
Neoeriocitrin	C09805	C27H32O15	37.5	11.2	3.45142	80.1308		-	48234	44009.6	43306.7	42398.2	45160.9	41847.7	32815	45583.9	59256.5	35115.1	54769.1	61389	113532	95504.9	107859	85506.8	91725.9	71031.1
Neohesperidin	C09806	C28H34O15	40.6	51.6	1.37849	53.3273		map00941 Flavonoid biosynthesis;	279580	273125	248128	306660	323485	282438	219814	342932	283276	224187	244336	300458	281708	294874	250295	251001	309892	262031
Pinocembrin	C09827	C15H12O4	41.3	13.3	0.554691	93.8481		map00941 Flavonoid biosynthesis;	102897	86279	64080.9	92677.7	89635.5	91290.6	88967.7	115047	79823.7	90426.5	69632.7	72647.6	85725.4	86984.8	76367.8	90513.5	90024.8	80989.1
Pinocembrin 7-rhamnosylglucoside	C09828	C27H32O13	44.4	36	2.15511	88.5102		-	1.13835e+06	1.17723e+06	1.19978e+06	1.32451e+06	1.39902e+06	1.38016e+06	1.2539e+06	1.68583e+06	1.16949e+06	1.18976e+06	1.31292e+06	1.05419e+06	283025	278694	232118	252310	284746	282539
2,3-Dihydro-2-(4-methoxyphenyl)-5,6,7-trimethoxy-4H-1-benzopyran-4-one	C15118	C19H20O6	33.8	0	1.41724	70.7172		-	398973	422319	390015	534451	437752	411791	437339	614342	409535	439776	318824	411575	371391	410732	315685	360591	343903	292885
Hesperetin 7-O-glucoside	C16422	C22H24O11	40.3	21.7	-0.856866	80.7222		map00941 Flavonoid biosynthesis;	17192.2	14787.5	22441.5	21639.8	17085.2	19752.1	20302.4	27559.4	22313.9	19166.8	21229.5	23375.7	26822.2	31416.2	30598.9	24830.8	26432.3	26807.8
8-C-Glucosylnaringenin	C16492	C21H22O10	42	30.2	-8.024	88.7244		map00941 Flavonoid biosynthesis;	115021	94407	103090	113688	100119	104264	117694	184581	125600	147664	79343.2	141563	57770.1	41730.5	40901	40574.9	54972	47482.9
(-)-Acanthocarpan	C10198	C17H12O7	47.7	41	-1.9367	99.6772	Pterocarpans (12)	-	57368.6	79907.5	43085.9	98734.4	64431.4	61201.2	48981.8	95870	90557.8	33475.2	104909	81556.9	171429	83564.9	79440.1	149065	187674	108049
Anhydroglycinol	C10200	C15H10O4	39.4	0	-0.122273	97.0211		map00943 Isoflavonoid biosynthesis; map01110 Biosynthesis of secondary metabolites;	65391.2	56222.3	51513.4	67720	54726.5	53882.6	57297.2	74981.9	66070.5	48546	71419.7	55442	73277.2	76285	64859.7	61351.6	64847.3	66123.1
Cristacarpin	C10206	C21H22O5	37.2	0.731	7.72857	93.8756		-	12752.6	18953.1	17056.2	11118.8	14629.5	17464.2	15330.8	37533.8	11414.7	32883.1	12115.4	10927.6	6232.91	3066.01	5455.57	11600.9	1080.19	8843.19
Hildecarpin	C10424	C17H14O7	42.5	37.4	0.804077	76.0088		-	1.09104e+06	596144	1.11149e+06	621877	989266	1.1451e+06	781433	484573	735542	789950	583716	717684	423137	389961	208842	399488	478603	219285
(-)-Maackiain	C10502	C16H12O5	39	0	-0.997498	96.0546		map00943 Isoflavonoid biosynthesis;	13129.6	9966.84	8047.9	6342.5	10703.4	9936.73	12298.1	11298.4	6395.82	6892.13	7852	9898.52	8495.19	6662.15	6238.61	6940.71	5495.63	4623.32
Medicarpin	C10503	C16H14O4	44.5	36.6	-1.04659	87.2202		map00943 Isoflavonoid biosynthesis; map01110 Biosynthesis of secondary metabolites;	4.47739e+06	6.02578e+06	3.97079e+06	7.30104e+06	5.71721e+06	4.80026e+06	5.33407e+06	9.56915e+06	4.8869e+06	5.60875e+06	2.5825e+06	5.50666e+06	3.55726e+06	6.82519e+06	5.56769e+06	6.31804e+06	5.28551e+06	4.75786e+06
Pisatin	C10516	C17H14O6	39.6	0	-0.646866	98.74		map00943 Isoflavonoid biosynthesis; map01110 Biosynthesis of secondary metabolites;	1.2143e+06	550130	2.58361e+06	733005	764104	1.25066e+06	6.55096e+06	968006	1.94728e+06	5.45438e+06	2.7637e+07	2.19227e+06	681206	226417	253856	349761	826318	251114
Glyceollin III	C15511	C20H18O5	47.9	44.8	-2.12329	97.2635		map00943 Isoflavonoid biosynthesis;	89439.5	97978	101484	113039	109298	89747.9	301997	430904	133532	243307	131739	128479	26703.3	46471	41609.8	50498.7	33958.5	30525.2
(-)-Medicocarpin	C16223	C22H24O9	41.7	37.9	-7.39252	79.1512		map00943 Isoflavonoid biosynthesis;	355957	369924	316716	346711	282976	268166	290368	354539	236875	243559	229898	248597	157140	212381	159244	197273	163707	221399
Medicarpin 3-O-glucoside-6'-malonate	C16224	C25H26O12	40.6	10.9	-2.75525	95.5084		map00943 Isoflavonoid biosynthesis;	914114	1.16519e+06	863812	1.07641e+06	848625	919683	961481	1.50681e+06	1.50904e+06	988432	7.85243e+06	1.5131e+06	739964	1.1821e+06	996279	824045	813451	1.13511e+06
(+)-6a-Hydroxymaackiain	C16230	C16H12O6	43.7	25.7	-2.21222	95.6494		map00943 Isoflavonoid biosynthesis; map01110 Biosynthesis of secondary metabolites;	45344.9	37630.9	81320.7	35937.5	49361.9	40114.7	73186.6	11922.9	59945.8	96472.1	56173.4	40990.8	46843.6	39691.6	51617.4	55478.6	53113.1	38791.7
(-)-Maackiain-3-O-glucosyl-6''-O-malonate	C16231	C25H24O13	37.8	8.07	9.00512	90.6994		map00943 Isoflavonoid biosynthesis;	472864	366371	535264	341380	393304	492813	388636	529179	309148	480600	592340	288415	538865	370459	324815	425955	612853	320079
Isochamaejasmin	C09758	C30H22O10	38.6	16.2	0.299295	77.2796	Biflavonoids and polyflavonoids (11)	-	546592	701663	508197	776677	607233	605809	558877	553423	880545	459486	626309	879013	1.15217e+06	837857	580788	834937	918306	763714
Kolaflavanone	C09761	C31H24O12	41.4	25.5	-1.19109	83.1073		-	791778	871898	765686	955162	846980	824949	967441	1.71079e+06	866813	912314	431662	969744	473008	647259	535015	567061	600685	534837
Manniflavanone	C09763	C30H22O13	37.7	15.8	8.93683	82.56		-	135147	111943	157920	144002	203284	167905	143252	104236	130721	165748	197836	150065	199346	171706	115041	185356	176382	134451
Ginkgetin	C10048	C32H22O10	37.2	6.32	-9.58398	90.3327		-	54927.5	88781.9	64094.7	72287.9	52918.9	64500.1	36057.7	116292	75545.6	50009.8	44223.4	90497.3	76893.1	71918.2	89235.7	58007.7	50886.3	95044.4
Robustaflavone	C10179	C30H18O10	37.8	0.00192	3.33222	93.15		-	115814	121957	137049	140793	119797	108839	99704.1	41135.8	138702	91491.6	174148	107778	3.10623e+06	1.989e+06	1.85098e+06	2.34886e+06	2.73547e+06	2.29174e+06
Sciadopitysin	C10182	C33H24O10	35.2	9.57	-1.88192	68.6384		-	1.08196e+06	1.1149e+06	1.12195e+06	1.15726e+06	1.19581e+06	1.17487e+06	1.13277e+06	1.17697e+06	1.19332e+06	1.23563e+06	2.32869e+06	1.24087e+06	1.29685e+06	1.1839e+06	836031	1.10616e+06	1.1536e+06	794287
(R)-4-Methoxydalbergione	C10505	C16H14O3	44.3	41.6	-4.80178	85.3572		-	1.08401e+06	934156	1.27204e+06	1.14316e+06	1.11836e+06	1.20714e+06	1.75928e+06	758520	1.25175e+06	1.72498e+06	1.0089e+06	1.0218e+06	529854	570770	473586	545206	543616	414753
Cinnamtannin A1	C17624	C45H38O18	53.4	71	1.35718	97.4449		-	3.56337e+07	7.68671e+07	2.64059e+07	7.89152e+07	4.73742e+07	3.50644e+07	3.66969e+07	3.07004e+07	9.01665e+07	2.79446e+07	1.67232e+08	8.17754e+07	2.28314e+08	1.6034e+08	1.87119e+08	1.80038e+08	1.62107e+08	2.0635e+08
Cinnamtannin A2	C17625	C60H50O24	53.1	75.8	1.95561	91.7442		-	1.77937e+07	4.0023e+07	1.38985e+07	3.98232e+07	2.55586e+07	1.85902e+07	2.16223e+07	1.43406e+07	4.85403e+07	1.60587e+07	1.04481e+08	4.47308e+07	9.86369e+07	7.7911e+07	8.89194e+07	8.54641e+07	7.62565e+07	1.00669e+08
Cinnamtannin D1	C17632	C45H36O18	35.9	7.75	2.04016	74.4017		-	2.59549e+06	2.85248e+06	2.78226e+06	3.45859e+06	3.14569e+06	3.0052e+06	2.28613e+06	2.3688e+06	4.00811e+06	1.73862e+06	5.82172e+06	3.47019e+06	7.44821e+06	3.80404e+06	3.85443e+06	4.42984e+06	5.45422e+06	4.44676e+06
Cinnamtannin D2	C17633	C60H48O24	35.9	8.52	2.92783	74.3222		-	504375	654142	708709	716828	938275	879076	406333	471465	1.19172e+06	341487	1.73321e+06	1.19395e+06	2.42812e+06	421410	720145	1.03713e+06	1.51251e+06	662346
Abyssinone VI	C08573	C25H28O4	35.3	5.15	5.15842	77.2496	Chalcones (7)	-	3447.22	3564.1	8075.12	4260.68	7257.41	5252.99	3696.56	2195.13	4923.07	3889.02	5422.59	4632.31	7452.57	4423.59	4910.12	5737.87	7160.97	4945.41
Carthamone	C08598	C21H20O11	34.1	17.9	-4.22887	57.2886		-	483081	505240	526959	437620	460862	486087	542192	485185	435277	563771	362014	509256	361509	290261	229448	306457	350885	258261
Isobavachalcone	C08648	C20H20O4	41.4	21.8	-9.82322	95.6928		-	622830	672283	595393	685225	675305	660487	829308	563294	782791	871403	868950	720694	336518	393189	243304	325653	327490	199017
Eriodictyol chalcone	C15525	C15H12O6	46.7	38.8	-0.0763015	94.849		map00941 Flavonoid biosynthesis;	1.37554e+06	1.55657e+06	1.27771e+06	1.83298e+06	1.51644e+06	1.42346e+06	522378	2.26059e+06	1.66386e+06	570291	467829	2.22984e+06	1.54155e+06	2.82267e+06	3.7474e+06	2.99184e+06	2.25321e+06	3.57332e+06
Homoeriodictyol chalcone	C16405	C16H14O6	42.5	24.4	-4.58108	93.2747		map00941 Flavonoid biosynthesis;	20661.4	34548.1	21521.5	44334.3	26980.7	26970.9	35476.1	63731.9	33921.2	27642.2	10658.2	27677.9	11751.3	14407.3	15527.2	14590.5	18675	15816.1
2',4,4',6'-Tetrahydroxychalcone 4'-O-glucoside	C16407	C21H22O10	38.1	15.7	7.2769	82.9774		map00941 Flavonoid biosynthesis;	12811.7	12674.3	15409.2	17224.4	11017.4	23767.8	22150.3	20163.9	22685.2	28518.3	23643.1	13773.3	15022.3	15841.4	26944.2	21558.9	25572.8	14623
Desmethylxanthohumol	C16416	C20H20O5	52.3	68.6	-3.54171	96.8106		map00941 Flavonoid biosynthesis;	162714	148141	170849	174605	192128	166511	592609	374752	204192	537847	239763	157277	29680.1	61448.3	35268.3	53744.1	46695.5	26473.5
Dracorubin	C09726	C32H24O5	33.4	0	-3.02299	70.7688	Proanthocyanidins (8)	-	789852	622929	805401	654633	747637	846622	805455	614109	600603	868421	388235	631922	521596	573087	348462	574260	638049	325867
ent-Fisetinidol-(4beta->8)-catechin-(6->4beta)-ent-fisetinidol	C10225	C45H38O16	33.9	0	8.47679	79.1365		-	205271	127600	208979	134755	159218	160093	229940	208507	191936	174276	114831	136845	295341	208426	86301.5	177470	216385	110586
Gallocatechin-(4alpha->8)-epigallocatechin	C10227	C30H26O14	44.9	34.8	-2.733	92.8321		-	457482	1.21984e+06	362247	819167	643858	377924	369377	319675	2.98609e+06	522837	6.3956e+06	1.79817e+06	1.27229e+06	2.03455e+06	2.34411e+06	1.36228e+06	1.21434e+06	2.49538e+06
Gambiriin C	C10228	C30H26O11	38.9	15.1	-1.69175	81.4588		-	1.66049e+06	2.5112e+06	1.29583e+06	3.05694e+06	2.14952e+06	1.93087e+06	1.9133e+06	1.31027e+06	2.40553e+06	2.11086e+06	2.09026e+06	2.73184e+06	2.60597e+06	2.61571e+06	3.09275e+06	2.57453e+06	2.5342e+06	3.07781e+06
Guibourtinidol-(4alpha->6)-catechin	C10231	C30H26O10	34.7	0	0.668081	74.4225		-	28887.5	72933	32900	67303.4	54982	48526.5	48279.2	44890.4	83063.6	72768.9	39646.4	64577.4	22835.8	22649.4	44522.3	38385.9	29321.4	36099.7
Kandelin A-1	C10233	C39H32O15	39.9	17.5	6.64662	89.7659		-	1.4812e+06	1.45564e+06	1.61868e+06	1.64333e+06	1.77223e+06	1.76929e+06	1.53116e+06	1.60417e+06	1.6688e+06	1.55635e+06	1.32692e+06	1.873e+06	1.3423e+06	1.46091e+06	1.03981e+06	1.44366e+06	1.41743e+06	1.27712e+06
Mahuannin D	C10234	C30H24O9	42.9	37.5	-6.60446	84.3616		-	40413.7	50541.2	47275.2	45603.8	42823.7	38918	41581	52181.6	47715	44485.8	34474.6	35680.5	50620.4	41472.3	46589.2	30635.4	16936.1	28125.6
Proanthocyanidin A2	C10237	C30H24O12	46.9	64.1	0.0327736	70.255		-	5.57027e+06	1.09503e+07	4.90317e+06	1.07595e+07	7.30464e+06	6.29071e+06	6.26253e+06	7.53151e+06	1.40473e+07	6.12972e+06	2.71926e+07	1.43574e+07	2.43147e+07	2.01329e+07	2.26074e+07	2.08941e+07	1.97743e+07	2.47927e+07
Phlorizin	C01604	C21H24O10	40.2	7.95	-0.920691	94.2713	Dihydrochalcones (7)	map00941 Flavonoid biosynthesis; map01110 Biosynthesis of secondary metabolites;	14343.3	11623.2	17945	12410.7	14736.1	16406.8	18720.2	15008.4	11663.9	15402.7	9280.97	10702.2	9032.9	11258.3	5129.47	10439.2	12108.6	1664.1
Asebogenin	C09471	C16H16O5	38	0	-3.22183	93.7785		-	32177.3	3229.72	66.1473	117.774	179.13	142.154	1302.5	2847.57	64.1379	282.069	535.576	61.6836	16817.3	699.144	16.7246	323.716	77.618	13.137
Glycyphyllin	C09754	C21H24O9	39.4	12.5	-4.48877	89.6849		-	27681.5	40542.6	31620.2	46100.8	30807.6	23231.9	37151.4	41769.1	37120.4	23843.8	14572.1	34257.3	56749.9	143511	180285	86356.3	72213.1	109403
Isouvaretin	C09759	C23H22O5	43	33	-9.28671	92.0414		-	185565	140471	241405	160208	183423	210242	200250	111349	130731	228416	102320	141975	450326	379770	331107	395353	407713	310543
Odoratol	C09807	C17H18O5	38.7	12.7	-3.24028	84.4288		-	260672	456690	229824	463077	375136	225372	447737	826224	264608	416988	204249	287481	165647	257628	238848	219798	161085	197697
Piperaduncin B	C09829	C29H30O8	43	21.6	-0.0474071	93.5387		-	242014	158991	196223	210007	289660	271189	186272	114368	171982	210951	143992	188873	162737	129196	125459	155941	162544	107565
Uvaretin	C09978	C23H22O5	38.5	1.25	-0.512512	91.6644		-	73662.1	70621.1	46279.3	53471.4	57810.1	54395.3	74216	87965.9	71061.8	50754	69965.8	90513.3	86641	82929.9	48278.4	58025.8	59105	59912.8
Dihydrokaempferol	C00974	C15H12O6	51.1	60.2	0.581889	96.2564	Dihyroflavonols (5)	map00941 Flavonoid biosynthesis; map01100 Metabolic pathways; map01110 Biosynthesis of secondary metabolites;	6.28372e+06	1.10528e+07	5.17247e+06	1.13048e+07	7.84576e+06	6.52578e+06	5.10773e+06	6.7789e+06	1.22306e+07	5.12e+06	2.46392e+07	1.20919e+07	2.23924e+07	1.90643e+07	2.09038e+07	1.94592e+07	1.83136e+07	2.30081e+07
Glepidotin B	C09753	C20H20O5	44.9	30.8	-2.07148	96.0536		-	3.67674e+06	3.12188e+06	3.70859e+06	3.94815e+06	4.15077e+06	4.1323e+06	4.42884e+06	2.30927e+06	3.5258e+06	4.95108e+06	2.62481e+06	3.17126e+06	5.01685e+06	3.87301e+06	2.70276e+06	4.1227e+06	4.91502e+06	2.37339e+06
6-Methoxytaxifolin	C09770	C16H14O8	51.2	63.6	-1.79729	94.616		-	12608.2	44166.8	41994.5	36070.9	22477.6	24698.2	9340.28	67844.1	31179.6	21849	587110	39041.3	8629.8	10919	14205.5	6778.32	18432.6	18673.1
Phellamurin	C09808	C26H30O11	48.6	61.7	7.74979	90.0813		-	269471	376292	265507	391365	379228	323930	568983	476170	256397	558768	259688	279334	58556.8	114235	108767	130839	114536	118989
Pinobanksin 3-O-acetate	C16418	C17H14O6	49.5	57.1	2.32313	93.0811		map00941 Flavonoid biosynthesis;	4.71075e+06	3.30381e+06	7.32355e+06	3.90609e+06	4.09138e+06	5.56681e+06	1.18768e+07	1.50361e+06	5.73809e+06	1.12516e+07	9.8388e+06	4.78554e+06	1.10802e+07	5.89036e+06	4.6206e+06	7.3162e+06	9.05973e+06	4.76995e+06
Kievitone	C01590	C20H20O6	43.7	36	9.6886	93.0056	Isoflavanones (5)	-	4510.86	2122.16	2231.89	1303.02	2834.34	5871.08	4192.19	2959.59	172.229	4882.19	536.352	210.614	4877.32	192.962	6183.78	175.722	8042.79	7036.1
Kievitone hydrate	C02549	C20H22O7	44.6	40	-2.62954	85.949		-	139115	128109	143310	143322	139258	124418	246772	305337	154885	250062	128118	118333	100505	73068	80063.4	88260.7	67471.3	62375.9
Cyclokievitone	C10207	C20H18O6	53.5	77.5	-2.95892	93.7341		-	59314.2	52147.1	55953.9	51973.8	46294.4	65664.9	173827	124160	53631.9	169150	58956.5	50072.9	83603.4	47788.5	48646.7	93026.7	80230.3	56746.7
Dalpanin	C10416	C26H30O12	51.3	75	8.74017	91.3791		-	1.63548e+07	3.77585e+07	1.3886e+07	1.36786e+07	1.4351e+07	1.31585e+07	1.16291e+07	1.48763e+07	1.21643e+07	9.37998e+06	4.84264e+07	1.31263e+07	1.6549e+07	3.2335e+07	2.38531e+07	3.54734e+07	2.76535e+07	3.22753e+07
2,6,7,4'-Tetrahydroxyisoflavanone	C16233	C15H12O6	49.2	55.9	-1.47132	92.0097		map00943 Isoflavonoid biosynthesis; map01110 Biosynthesis of secondary metabolites;	2.4124e+06	2.8085e+06	2.37908e+06	3.08659e+06	2.68618e+06	2.46809e+06	1.97199e+06	2.95413e+06	3.14573e+06	1.94457e+06	3.71865e+06	3.21558e+06	4.18467e+06	4.59286e+06	5.77992e+06	4.8115e+06	4.02081e+06	5.31456e+06
Mulberrofuran C	C08928	C34H28O9	35.5	0	-5.82854	84.3274	Diels-Alder adduct of chalcone (5)	-	205858	230978	263600	340879	209466	221761	213734	309322	288211	288196	208432	252177	857040	524630	613753	748622	678602	401828
Sanggenon D	C09835	C40H36O12	38	29.7	9.142	70.541		-	1.25134e+06	2.13112e+06	1.45375e+06	2.32361e+06	1.73904e+06	1.44509e+06	959068	2.53082e+06	1.79487e+06	1.28608e+06	951107	1.95768e+06	1.29231e+06	1.85416e+06	1.63625e+06	1.45905e+06	1.55777e+06	1.00292e+06
Kuwanone G	C10099	C40H36O11	37.3	1.38	-5.05108	91.1501		-	6.41733e+06	3.72044e+06	7.97323e+06	3.79168e+06	5.98717e+06	6.4456e+06	4.52421e+06	5.65106e+06	3.90346e+06	3.814e+06	2.47826e+06	4.00084e+06	1.27818e+06	1.42669e+06	1.35754e+06	1.24072e+06	1.43878e+06	1.50041e+06
Kuwanone H	C10100	C45H44O11	40.6	20.7	-5.15594	88.3107		-	1.83412e+06	1.81917e+06	1.79208e+06	2.14548e+06	1.96547e+06	1.81792e+06	1.99895e+06	2.39158e+06	2.12342e+06	2.01871e+06	1.54918e+06	2.08437e+06	5.07534e+06	3.03737e+06	3.18596e+06	3.21689e+06	4.14689e+06	3.10589e+06
Auriculoside	C09478	C22H26O10	51.8	74.4	-3.62674	88.9224		-	59522.3	65632.5	60362.1	61133.7	51336.9	51139	68825	97789.4	47545.4	73105.6	47333	57021.8	76437.2	58717.4	66149.2	64478.7	60672.7	56257.1
Diffutin	C09636	C23H28O10	40	23.3	-2.89518	80.164	Flavans (3)	-	636905	728752	693834	847201	779220	701352	764617	955272	679195	786645	586941	771257	651829	724565	737061	799082	864594	577504
7,4'-Dihydroxy-8-methylflavan	C09650	C16H16O3	37.7	0	-6.30785	95.7145		-	25648.5	29950.6	22458.6	34520.8	29671.3	17554.1	29386.1	47705.8	21401.8	24619.7	10195.8	13694.1	4735.45	0.00123518	34.9091	5385.99	4743.87	197.36
Kazinol A	C09760	C25H30O4	37.1	0.984	9.99743	95.5666		-	149506	98045.3	172489	124982	152942	177564	78836.9	61224.6	112578	100923	92030.1	138966	118977	88229.2	94978.1	104309	110512	109525
Deguelin	C10417	C23H22O6	39.4	11.4	-9.20533	95.571	Rotenones (4)	-	2976.96	2536.82	2155.78	2394.39	2826.41	2670.53	2389.04	3110.12	2707.77	2416.14	3042.89	2823.5	2771.62	2977.89	2785.04	2433.21	2653.71	2306.96
Millettone	C10506	C22H18O6	37.1	0	0.485201	85.9324		-	30233.9	27018.2	36204.6	26364	32080.4	40078.3	29542.8	24547.5	34189.1	34178.6	33206.5	31496.7	27306.8	18762.2	27641	29671.2	35371	26447.1
Rotenonone	C10525	C23H18O7	38.7	8.24	4.99129	91.0494		-	41294.6	46315.6	58445.7	41397.8	68058.3	69156.1	65674.5	96002.1	68962.4	79641.9	71889	58372.7	59874.6	46308.9	57149.7	57442.7	65862.5	62569.8
Tephrosin	C10535	C23H22O7	33.9	19.1	5.52295	56.6179		-	770426	762742	784784	813555	784013	818787	819208	842644	716662	897296	637730	730974	740809	706199	598820	681043	792084	669087
Apigeninidin	C08574	C15H11O4	36.1	0	-9.08116	90.4891	Anthocyanidin (3)	-	62057.7	44888	67086.8	67980.9	85310.1	96772.1	45136.5	42352.5	63477.6	67974	23977.4	71234.5	125155	84608.9	74327.9	140756	190484	71616.7
Malvidin	C08716	C17H15O7	26.3	0.599	-7.22611	38.9014		-	213071	315379	202371	304689	231952	236107	257313	329952	286303	276655	695840	303143	224132	311893	298949	297837	257113	311676
Riccionidin A	C08728	C15H9O6	36.4	0	-1.40142	83.7965		-	16219.2	6760.47	29960.5	8188.48	13095.1	24668.8	46364.9	5985.67	18993.7	37652.4	76918.1	14159.9	43492.5	22388.9	16618.9	23695.1	21025.1	26670.1
Maritimetin	C08720	C15H10O6	41.7	15.1	1.6325	95.2594	Aurones (3)	-	82008.8	108983	63656.2	107182	78618.1	81108.4	75641.6	70465.9	109199	67700.9	142692	99830.5	167833	147861	134336	132157	140289	181294
4,5-Methylenedioxy-6-hydroxyaurone	C08722	C16H10O5	37.5	0	1.09531	88.8061		-	19170.8	27940.5	14586.6	27053	19330.4	11985.4	12934.1	20118.7	28433.1	27582.7	36900.4	17681.1	62305.7	50092.2	34371.5	32195.8	28427	29505.1
Bracteatin 6-O-glucoside	C16410	C21H20O12	40	9.77	0.256158	90.4991		map00941 Flavonoid biosynthesis;	175998	199200	183339	227065	244033	245505	150899	168723	206136	159062	139087	245992	142595	121812	77139	165838	185812	98255.6
Catechin 7-O-beta-D-xyloside	C09617	C20H22O10	44.4	30.7	-1.94847	93.6552	Flavan 3-ols (3)	-	5690.63	7250.26	6181.11	4674.98	1378.36	10574.2	3146.85	5570.15	8481.79	2713.87	4153.68	8073.3	26024.1	58283.6	193630	86274.1	43242.6	115836
(-)-Epiafzelechin	C12128	C15H14O5	50.4	64.8	-3.75959	91.7913		map00941 Flavonoid biosynthesis; map01110 Biosynthesis of secondary metabolites;	323108	191710	529922	226968	663782	705846	454746	186389	153964	299146	393115	507611	656370	301245	474505	512993	663119	470327
(-)-Epigallocatechin	C12136	C15H14O7	42.1	13.9	-2.01736	98.7536		map00941 Flavonoid biosynthesis; map01110 Biosynthesis of secondary metabolites;	2.87828e+06	5.6936e+06	1.96405e+06	5.21156e+06	3.75624e+06	2.31135e+06	1.94934e+06	2.59265e+06	1.03474e+07	2.42436e+06	1.64069e+07	8.7011e+06	5.93812e+06	6.46994e+06	8.03467e+06	5.3452e+06	5.12355e+06	8.10699e+06
Peonidin 3-O-glucoside	C12141	C22H23O11	32	0	-6.45959	67.2116	Flavonoid glycosides (3)	map00942 Anthocyanin biosynthesis;	166022	155001	200796	205331	181103	216840	216799	224227	183240	219147	148800	179012	231188	266547	199849	209836	272557	166760
Astilbin	C17449	C21H22O11	43.8	25.3	0.553675	94.2638		-	12418.8	13822.8	12573.3	13269.6	14449.2	14861.8	11044	12164.2	13016.8	11296.2	11966.6	9754.91	11866.5	11829.4	9920.82	12678.2	10569	8330.71
Multinoside A	C17563	C27H30O16	39.3	1.83	1.02143	95.7399		-	4.27675e+06	1.89035e+06	4.26889e+06	2.14028e+06	3.72929e+06	4.73612e+06	2.33501e+06	845231	3.16664e+06	2.53265e+06	4.47721e+06	2.56341e+06	1.88943e+07	1.65627e+07	1.00328e+07	1.70006e+07	1.73608e+07	1.21332e+07
cis-3,4-Leucopelargonidin	C03648	C15H14O6	51.9	67.1	-1.08821	93.6426	Flavan 3,4-diols (2)	map00941 Flavonoid biosynthesis; map01100 Metabolic pathways; map01110 Biosynthesis of secondary metabolites;	2.99461e+06	4.65661e+06	2.52923e+06	4.8989e+06	3.5347e+06	2.99124e+06	2.32996e+06	3.96102e+06	4.61891e+06	2.594e+06	6.22751e+06	4.59302e+06	6.9201e+06	6.23413e+06	5.92276e+06	6.26547e+06	6.17732e+06	6.45049e+06
Leucodelphinidin	C05909	C15H14O8	39.4	14.7	5.46673	88.4765		map00941 Flavonoid biosynthesis; map01110 Biosynthesis of secondary metabolites;	80423.6	80640	120148	105020	113152	98194.8	123908	90703.8	78247.5	158814	87373.5	80852.6	19768.7	18026.1	20638.9	22401.1	29577	6278.03
Luteoforol	C05907	C15H14O6	49.9	63.2	-8.51596	95.915	Flavan 4-ols (2)	map00941 Flavonoid biosynthesis;	8344.54	6180.87	6373.45	3362.07	6959.44	4259.62	5757.94	1707.76	835.894	1815.46	1326.43	1810	8794.68	4630.27	6588.69	3610.78	200.36	494.176
Tephrowatsin A	C09970	C22H26O4	40.1	8.92	0.454724	92.218		-	189595	202569	164852	180584	183682	152306	203611	207481	223893	162424	216749	190832	180134	246590	205461	186155	191453	185967
Lotisoflavan	C10495	C17H18O5	43.5	29.4	0.36667	88.4655	Isoflavanes (2)	-	1.2804e+06	1.50934e+06	1.17298e+06	1.69381e+06	1.40215e+06	1.28829e+06	1.4314e+06	2.27526e+06	1.23331e+06	1.48301e+06	1.14001e+06	1.33066e+06	1.1256e+06	1.5737e+06	1.37567e+06	1.49416e+06	1.14823e+06	1.18379e+06
(-)-Phaseollinisoflavan	C10515	C20H20O4	41.6	12.7	-1.11893	96.6066		-	3.53355e+06	3.11679e+06	3.7192e+06	3.84705e+06	4.50301e+06	4.31185e+06	3.89802e+06	2.04724e+06	2.99609e+06	4.77026e+06	2.31004e+06	2.71102e+06	817732	1.97156e+06	720417	1.52885e+06	1.52883e+06	582241
Psoralidin	C10523	C20H16O5	38.9	12.8	6.94907	89.3683	Coumestanes (2)	-	28615.6	25502.5	33974.2	28092.6	27009.1	34856.1	29217	27421.1	24282.6	29677	24350.7	30919.6	36175.6	28525.7	25236.6	29139.8	32417.7	23666
Wedelolactone	C10541	C16H10O7	40.2	7.61	0.949748	94.3896		-	761.193	1606.65	2093.37	1762.56	985.374	2018.18	1252.95	1725.54	2385.36	1172.29	1099.22	1212.67	1652	754.206	1344.27	1382.41	533.869	954.978
Mulberrofuran A	C08846	C25H28O4	41.7	15.8	4.99946	98.3366	2-Arylbenzofurans (1)	-	14930.1	12557.4	13956.9	12264.5	16499.7	17818.3	6827.81	3369.06	8373.47	8506.97	3686.48	10792.7	9248.96	6453.88	3432.9	9154.74	11733.2	7112.87
Lonchocarpenin	C10491	C27H28O6	36	0	9.53062	90.6007	3-Arylcoumarins (1)	-	9453.01	795.798	9354.27	6750.38	10737.4	9662.02	7278.79	1420.71	4669.72	9895.15	214.448	2483.04	2135.7	173.614	383.705	176.776	21.1861	3228.46
4',6,7-Trihydroxyisoflavone	C14314	C15H10O5	49.8	59.5	-3.99246	94.2001	Isoflav-2-enes (1)	map00943 Isoflavonoid biosynthesis; map01110 Biosynthesis of secondary metabolites;	28688	44664.8	25546.5	39911.2	26185.9	18483.2	22439	40721.6	28951.4	16673.3	16276.5	22820.2	42462.9	69665.3	158384	71833	42086.3	109534
Dihydrogenistein	C14458	C15H12O5	37.5	5.76	-7.15166	89.6413	Isoflavans (1)	-	76956.2	104565	64394.4	91309.2	82710.3	63445.9	46089.7	90743.5	77297.5	53216.7	53094	80131.5	182655	290132	384567	296591	242928	328062
Cyclomorusin	C17867	C25H22O6	39.4	13.5	9.94565	94.3283	Pyranoflavonoids (1)	-	5356.66	3002.6	5110.05	7027.22	3967.59	5871.47	5189.23	3194.39	2867.46	5256.41	1918.17	3876.01	1002.49	979.404	2291.92	2995.28	3212.32	1165.24
3'-O-Methyltricetin	C19739	C16H12O7	39.6	0	0.191196	98.1424	O-methylated flavonoids (1)	-	1.84406e+06	1.6193e+06	2.21226e+06	1.6972e+06	2.02216e+06	2.1799e+06	2.04181e+06	834059	2.3713e+06	2.136e+06	2.98455e+06	2.00004e+06	2.12912e+07	1.51949e+07	6.63816e+06	1.63459e+07	1.81193e+07	1.16026e+07
Stem_young, Stem_older and Stem_oldest were re-named as S1, S2 and S3 respectively. Score: total identification score, full score is 60 points, comprehensive scoring from MS2 fragment matching, quality error and isotope similarity score, the higher the score, the more reliable the identification result; Fragmentation.Score: MS2 identification score, matching with database theoretical fragments, f…

## Sheet: Table S2
Table S2. Differentially accumulated flavonoids between different groups
Compounds	KEGG.ID	S1 vs S2 (1)			S2 vs S3 (76)			S1 vs S3 (90)			Sub.class	Pathway
		Fold Change	VIP	Type	Fold Change	VIP	Type	Fold Change	VIP	Type
Robustaflavone	C10179	NA	NA	NA	21.9344	2.9615	up	19.2439	2.7899	up	Biflavonoids and polyflavonoids	NULL
Cyanidin 3-O-(6-O-p-coumaroyl)glucoside	C12095	NA	NA	NA	35.2095	2.9132	up	28.1753	2.6699	up	Anthocyanin	map00942 Anthocyanin biosynthesis;
Malonyldaidzin	C16191	NA	NA	NA	6.34269	2.7466	up	4.31448	2.2498	up	Isoflavones	map00943 Isoflavonoid biosynthesis;
Nortangeretin	C15031	NA	NA	NA	10.647	2.6215	up	7.14832	2.0824	up	Flavones	NULL
Rutin	C05625	NA	NA	NA	9.78347	2.5833	up	9.27974	2.5582	up	Flavonols	map00944 Flavone and flavonol biosynthesis; map01100 Metabolic pathways; map01110 Biosynthesis of secondary metabolites;
Acacetin	C01470	NA	NA	NA	0.0553274	2.546	down	0.039448	2.9616	down	Flavones	map00944 Flavone and flavonol biosynthesis;
Pisatin	C10516	NA	NA	NA	0.0578476	2.5347	down	0.364817	1.1113	down	Pterocarpans	map00943 Isoflavonoid biosynthesis; map01110 Biosynthesis of secondary metabolites;
3'-O-Methyltricetin	C19739	NA	NA	NA	7.21166	2.4892	up	7.70565	2.5566	up	O-methylated flavonoids	NULL
Diffutin	C09636	NA	NA	NA	6.42363	2.4251	up	6.27568	2.4328	up	Flavans	NULL
Myricitrin	C10108	NA	NA	NA	10.4515	2.4058	up	8.69351	2.1923	up	Flavonols	NULL
Multinoside A	C17563	NA	NA	NA	5.77786	2.3582	up	4.37153	1.9844	up	Flavonoid glycosides	NULL
6-Methoxyluteolin 7-rhamnoside	C10104	NA	NA	NA	7.74734	2.3464	up	7.26503	2.2909	up	Flavones	NULL
Catechin 7-O-beta-D-xyloside	C09617	NA	NA	NA	16.2818	2.3337	up	14.6377	2.3223	up	Flavan 3-ols	NULL
Malonylapiin	C05622	NA	NA	NA	5.13159	2.3315	up	5.12875	2.3795	up	Flavones	map00944 Flavone and flavonol biosynthesis;
Hypolaetin	C10078	NA	NA	NA	0.0477166	2.2536	down	NA	NA	NA	Flavones	NULL
Pinobanksin 3-O-acetate	C16418	NA	NA	NA	0.0534902	2.2457	down	0.124069	1.8326	down	Dihyroflavonols	map00941 Flavonoid biosynthesis;
Dihydrogenistein	C14458	NA	NA	NA	4.30617	2.1355	up	3.56848	1.8572	up	Isoflavans	NULL
8-Hydroxykaempferol	C02806	NA	NA	NA	0.101631	2.0729	down	0.0767048	2.7005	down	Flavonols	NULL
Genistein 8-C-glucoside	C10420	NA	NA	NA	4.43823	2.0432	up	4.88714	2.1879	up	Isoflavones	NULL
Phellamurin	C09808	NA	NA	NA	0.269209	2.0364	down	0.322029	1.8713	down	Dihyroflavonols	NULL
Lucenin-2	C10102	NA	NA	NA	6.29191	2.0358	up	5.03649	1.7969	up	Flavones	NULL
Pinocembrin 7-rhamnosylglucoside	C09828	NA	NA	NA	0.210463	1.9668	down	0.211763	1.9886	down	Flavanones	NULL
Medicarpin	C10503	NA	NA	NA	0.0909686	1.9369	down	0.1573	1.6195	down	Pterocarpans	map00943 Isoflavonoid biosynthesis; map01110 Biosynthesis of secondary metabolites;
Cyanidin 3-glucoside 5-caffeoylglucoside	C16372	NA	NA	NA	0.224279	1.9037	down	0.300562	1.55	down	Anthocyanin	map00942 Anthocyanin biosynthesis;
Pelargonidin 3-O-beta-D-glucoside 5-O-(6-coumaroyl-beta-D-glucoside)	C16349	NA	NA	NA	10.6641	1.8899	up	17.9545	2.3326	up	Anthocyanin	map00942 Anthocyanin biosynthesis;
Quercetin 3-O-glucoside	C05623	NA	NA	NA	5.23096	1.8889	up	3.34106	1.2853	up	Flavonols	map00944 Flavone and flavonol biosynthesis; map01100 Metabolic pathways; map01110 Biosynthesis of secondary metabolites;
Quercetin 3-O-(6-O-malonyl-beta-D-glucoside)	C12638	NA	NA	NA	5.17489	1.8445	up	3.44824	1.2567	up	Flavonols	map00944 Flavone and flavonol biosynthesis;
Robinetin	C10177	NA	NA	NA	4.22389	1.8367	up	4.42562	1.8734	up	Flavonols	NULL
Quercitrin	C01750	NA	NA	NA	0.147041	1.7782	down	0.122196	2.1187	down	Flavonols	map00944 Flavone and flavonol biosynthesis;
Irisolidone	C10471	NA	NA	NA	0.0644554	1.7322	down	NA	NA	NA	Isoflavones	NULL
Pelargonidin 3-O-(6-caffeoyl-beta-D-glucoside)	C16297	NA	NA	NA	0.185469	1.7296	down	0.176912	1.8546	down	Anthocyanin	map00942 Anthocyanin biosynthesis;
3-O-Methylquercetin	C04443	NA	NA	NA	2.5417	1.7176	up	2.09664	1.331	up	Flavonols	map00944 Flavone and flavonol biosynthesis;
Desmethylxanthohumol	C16416	NA	NA	NA	0.120255	1.69	down	0.249579	1.1944	down	Chalcones	map00941 Flavonoid biosynthesis;
Dasytrichone	C10035	NA	NA	NA	0.13077	1.6803	down	0.230379	1.3613	down	Flavones	NULL
Apigenin 7-O-[beta-D-apiosyl-(1->2)-beta-D-glucoside] (Apiin)	C04858	NA	NA	NA	3.70824	1.643	up	4.51601	1.8557	up	Flavones	map00944 Flavone and flavonol biosynthesis;
(R)-4-Methoxydalbergione	C10505	NA	NA	NA	0.408995	1.6418	down	0.455371	1.5476	down	Biflavonoids and polyflavonoids	NULL
Morusinol	C17868	NA	NA	NA	0.34544	1.6235	down	0.348125	1.7275	down	Flavones	NULL
Luteolin 7-O-glucuronide	C03515	NA	NA	NA	0.140219	1.6174	down	0.0690838	2.4476	down	Flavones	map00944 Flavone and flavonol biosynthesis;
Delphinidin 3-(6-p-coumaroyl)glucoside	C16370	NA	NA	NA	0.332552	1.5733	down	0.360249	1.5145	down	Anthocyanin	map00942 Anthocyanin biosynthesis;
Leucodelphinidin	C05909	NA	NA	NA	0.18824	1.5645	down	0.195271	1.5694	down	Flavan 3,4-diols	map00941 Flavonoid biosynthesis; map01110 Biosynthesis of secondary metabolites;
8-C-Glucosylnaringenin	C16492	NA	NA	NA	0.355871	1.5609	down	0.449471	1.2587	down	Flavanones	map00941 Flavonoid biosynthesis;
8-(1,1-DMA)kaempferide	C11580	NA	NA	NA	2.98977	1.5548	up	2.73904	1.4133	up	Flavonols	NULL
Isouvaretin	C09759	NA	NA	NA	2.48602	1.5449	up	2.0287	1.1876	up	Dihydrochalcones	NULL
Glyceollin III	C15511	NA	NA	NA	0.167718	1.4793	down	NA	NA	NA	Pterocarpans	map00943 Isoflavonoid biosynthesis;
Malvin	C08718	NA	NA	NA	0.360606	1.4414	down	NA	NA	NA	Anthocyanin	NULL
Isobavachalcone	C08648	NA	NA	NA	0.393658	1.4374	down	0.466614	1.2216	down	Chalcones	NULL
3-Methoxyapigenin	C05902	NA	NA	NA	2.02436	1.4315	up	2.33949	1.5034	up	Flavonols	NULL
Cinnamtannin A1	C17624	NA	NA	NA	2.5874	1.394	up	3.74431	1.6986	up	Biflavonoids and polyflavonoids	NULL
2',4,4',6'-Tetrahydroxychalcone 4'-O-glucoside	C16407	NA	NA	NA	2.47477	1.391	up	2.07525	1.131	up	Chalcones	map00941 Flavonoid biosynthesis;
Tricetin	C10192	NA	NA	NA	2.64376	1.3777	up	2.78901	1.311	up	Flavones	map00941 Flavonoid biosynthesis;
Cyanidin 3-O-3'',6''-O-dimalonylglucoside	C16289	NA	NA	NA	0.384546	1.3496	down	0.397147	1.363	down	Anthocyanin	map00942 Anthocyanin biosynthesis;
Kaempferol 3-sophorotrioside	C12635	NA	NA	NA	2.84767	1.3446	up	NA	NA	NA	Flavonols	map00944 Flavone and flavonol biosynthesis;
Kolaflavanone	C09761	NA	NA	NA	0.461385	1.3318	down	0.530838	1.1323	down	Biflavonoids and polyflavonoids	NULL
Silandrin	C08600	NA	NA	NA	2.42493	1.3028	up	2.2127	1.1435	up	Flavanones	NULL
Cyanidin 3-(6-p-caffeoyl)glucoside	C16369	NA	NA	NA	0.329028	1.2896	down	NA	NA	NA	Anthocyanin	map00942 Anthocyanin biosynthesis;
Gallocatechin-(4alpha->8)-epigallocatechin	C10227	NA	NA	NA	2.53424	1.2685	up	NA	NA	NA	Proanthocyanidins	NULL
(-)-Phaseollinisoflavan	C10515	NA	NA	NA	0.381666	1.247	down	0.310429	1.5766	down	Isoflavanes	NULL
Kaempferol 3-O-beta-D-glucosylgalactoside	C16490	NA	NA	NA	0.443807	1.2418	down	0.219354	2.2769	down	Flavonols	map00944 Flavone and flavonol biosynthesis;
Santin	C10180	NA	NA	NA	0.286622	1.2094	down	NA	NA	NA	Flavonols	NULL
Glycyphyllin	C09754	NA	NA	NA	3.43651	1.2082	up	3.24284	1.1226	up	Dihydrochalcones	NULL
Vitexin 2''-O-beta-L-rhamnoside	C12628	NA	NA	NA	2.70168	1.1825	up	2.35697	1.0189	up	Flavones	map00944 Flavone and flavonol biosynthesis;
Maritimetin	C08720	NA	NA	NA	1.59809	1.1616	up	1.73283	1.3236	up	Aurones	NULL
Sophoranone	C08719	NA	NA	NA	3.32221	1.1564	up	NA	NA	NA	Flavanones	NULL
Kuwanone G	C10099	NA	NA	NA	0.33819	1.1274	down	0.240053	1.4984	down	Diels-Alder adduct of chalcone	NULL
Salvianin	C12647	NA	NA	NA	2.64692	1.1177	up	4.64613	1.4521	up	Anthocyanin	map00942 Anthocyanin biosynthesis;
(-)-Epiafzelechin	C12128	NA	NA	NA	2.82052	1.105	up	3.21444	1.1538	up	Flavan 3-ols	map00941 Flavonoid biosynthesis; map01110 Biosynthesis of secondary metabolites;
Cristacarpin	C10206	NA	NA	NA	0.301806	1.0924	down	NA	NA	NA	Pterocarpans	NULL
Homoeriodictyol chalcone	C16405	NA	NA	NA	0.439235	1.0888	down	0.461238	1.0703	down	Chalcones	map00941 Flavonoid biosynthesis;
Bowdichione	C10202	NA	NA	NA	1.64764	1.0788	up	1.74013	1.1804	up	Isoflavones	NULL
Sexangularetin	C10185	NA	NA	NA	0.332416	1.0603	down	0.216537	1.5668	down	Flavonols	NULL
Isosakuranetin	C05334	NA	NA	NA	0.620042	1.0449	down	NA	NA	NA	Flavanones	map00941 Flavonoid biosynthesis; map01110 Biosynthesis of secondary metabolites;
Gardenin B	C15109	NA	NA	NA	0.459334	1.0419	down	NA	NA	NA	Flavones	NULL
Eriodictyol chalcone	C15525	NA	NA	NA	0.274465	1.0291	down	0.077073	2.3552	down	Chalcones	map00941 Flavonoid biosynthesis;
Lonchocarpenin	C10491	NA	NA	NA	NA	NA	NA	0.130889	2.2712	down	3-Arylcoumarins	NULL
Pelargonidin 3-O-3'',6''-O-dimalonylglucoside	C16288	NA	NA	NA	NA	NA	NA	0.247267	2.2346	down	Anthocyanin	map00942 Anthocyanin biosynthesis;
Tamarixetin	C10188	NA	NA	NA	NA	NA	NA	0.144141	2.1118	down	Flavonols	NULL
Proanthocyanidin A2	C10237	NA	NA	NA	NA	NA	NA	2.89472	1.4924	up	Proanthocyanidins	NULL
2,6,7,4'-Tetrahydroxyisoflavanone	C16233	NA	NA	NA	NA	NA	NA	0.160857	1.4917	down	Isoflavanones	map00943 Isoflavonoid biosynthesis; map01110 Biosynthesis of secondary metabolites;
Cinnamtannin A2	C17625	NA	NA	NA	NA	NA	NA	3.3905	1.429	up	Biflavonoids and polyflavonoids	NULL
Bracteatin 6-O-glucoside	C16410	NA	NA	NA	NA	NA	NA	0.464465	1.3519	down	Aurones	map00941 Flavonoid biosynthesis;
Dihydrokaempferol	C00974	NA	NA	NA	NA	NA	NA	2.55558	1.3354	up	Dihyroflavonols	map00941 Flavonoid biosynthesis; map01100 Metabolic pathways; map01110 Biosynthesis of secondary metabolites;
Biochanin A 7-O-(6-O-malonyl-beta-D-glucoside)	C12625	NA	NA	NA	NA	NA	NA	0.368064	1.2599	down	Isoflavones	map00943 Isoflavonoid biosynthesis;
Hildecarpin	C10424	NA	NA	NA	NA	NA	NA	0.381521	1.2515	down	Pterocarpans	NULL
Dalpanin	C10416	NA	NA	NA	NA	NA	NA	0.492752	1.2152	down	Isoflavanones	NULL
Chrysoeriol	C04293	NA	NA	NA	NA	NA	NA	0.360571	1.1963	down	Flavones	map00944 Flavone and flavonol biosynthesis;
Cyclomorusin	C17867	NA	NA	NA	NA	NA	NA	0.383927	1.1823	down	Pyranoflavonoids	NULL
4,5-Methylenedioxy-6-hydroxyaurone	C08722	NA	NA	NA	NA	NA	NA	1.97305	1.1656	up	Aurones	NULL
Quercetin 3-O-beta-D-glucosyl-(1->2)-beta-D-glucoside	C12667	NA	NA	NA	NA	NA	NA	0.400664	1.1368	down	Flavonols	map00944 Flavone and flavonol biosynthesis;
4',6,7-Trihydroxyisoflavone	C14314	NA	NA	NA	NA	NA	NA	2.12658	1.1101	up	Isoflav-2-enes	map00943 Isoflavonoid biosynthesis; map01110 Biosynthesis of secondary metabolites;
Datiscetin	C10036	NA	NA	NA	NA	NA	NA	0.463567	1.0994	down	Flavonols	NULL
Neoeriocitrin	C09805	NA	NA	NA	NA	NA	NA	2.13302	1.0787	up	Flavanones	NULL
Scutellarein	C10184	NA	NA	NA	NA	NA	NA	0.423597	1.0681	down	Flavones	NULL
Mulberrofuran C	C08928	NA	NA	NA	NA	NA	NA	2.59719	1.0632	up	Diels-Alder adduct of chalcone	NULL
Baicalein 5,6,7-trimethyl ether	C10024	NA	NA	NA	NA	NA	NA	0.42747	1.0271	down	Flavones	NULL
Carthamone	C08598	NA	NA	NA	NA	NA	NA	0.619625	1.0268	down	Chalcones	NULL
cis-3,4-Leucopelargonidin	C03648	NA	NA	NA	NA	NA	NA	1.75745	1.0149	up	Flavan 3,4-diols	map00941 Flavonoid biosynthesis; map01100 Metabolic pathways; map01110 Biosynthesis of secondary metabolites;
Apigenin 7,4'-dimethyl ether	C10019	NA	NA	NA	NA	NA	NA	0.297216	1.0098	down	Flavones	NULL
Stem_young, Stem_older and Stem_oldest were re-named as S1, S2 and S3 respectively. VIP, variable importance in project; NA, means not signicantly differentially accumulated flavonoids

## Sheet: Table S3
Table S3. Variable importance in projection (VIP) scores of the top 20 metabolites in different comparison groups
Compounds	KEGG.ID	S2 vs S3			Sub.class	Pathway
		Fold Change	VIP	Type
Robustaflavone	C10179	21.9344	2.9615	up	Biflavonoids and polyflavonoids	NULL
Cyanidin 3-O-(6-O-p-coumaroyl)glucoside	C12095	35.2095	2.9132	up	Anthocyanin	map00942 Anthocyanin biosynthesis;
Malonyldaidzin	C16191	6.34269	2.7466	up	Isoflavones	map00943 Isoflavonoid biosynthesis;
Nortangeretin	C15031	10.647	2.6215	up	Flavones	NULL
Rutin	C05625	9.78347	2.5833	up	Flavonols	map00944 Flavone and flavonol biosynthesis; map01100 Metabolic pathways; map01110 Biosynthesis of secondary metabolites;
Acacetin	C01470	0.0553274	2.546	down	Flavones	map00944 Flavone and flavonol biosynthesis;
Pisatin	C10516	0.0578476	2.5347	down	Pterocarpans	map00943 Isoflavonoid biosynthesis; map01110 Biosynthesis of secondary metabolites;
3'-O-Methyltricetin	C19739	7.21166	2.4892	up	O-methylated flavonoids	NULL
Diffutin	C09636	6.42363	2.4251	up	Flavans	NULL
Myricitrin	C10108	10.4515	2.4058	up	Flavonols	NULL
Multinoside A	C17563	5.77786	2.3582	up	Flavonoid glycosides	NULL
6-Methoxyluteolin 7-rhamnoside	C10104	7.74734	2.3464	up	Flavones	NULL
Catechin 7-O-beta-D-xyloside	C09617	16.2818	2.3337	up	Flavan 3-ols	NULL
Malonylapiin	C05622	5.13159	2.3315	up	Flavones	map00944 Flavone and flavonol biosynthesis;
Hypolaetin	C10078	0.0477166	2.2536	down	Flavones	NULL
Pinobanksin 3-O-acetate	C16418	0.0534902	2.2457	down	Dihyroflavonols	map00941 Flavonoid biosynthesis;
Dihydrogenistein	C14458	4.30617	2.1355	up	Isoflavans	NULL
8-Hydroxykaempferol	C02806	0.101631	2.0729	down	Flavonols	NULL
Genistein 8-C-glucoside	C10420	4.43823	2.0432	up	Isoflavones	NULL
Phellamurin	C09808	0.269209	2.0364	down	Dihyroflavonols	NULL
Compounds	KEGG.ID	S1 vs S3			Sub.class	Pathway
		Fold Change	VIP	Type
Acacetin	C01470	0.039448	2.9616	down	Flavones	map00944 Flavone and flavonol biosynthesis;
Robustaflavone	C10179	19.2439	2.7899	up	Biflavonoids and polyflavonoids	NULL
8-Hydroxykaempferol	C02806	0.0767048	2.7005	down	Flavonols	NULL
Cyanidin 3-O-(6-O-p-coumaroyl)glucoside	C12095	28.1753	2.6699	up	Anthocyanin	map00942 Anthocyanin biosynthesis;
Rutin	C05625	9.27974	2.5582	up	Flavonols	map00944 Flavone and flavonol biosynthesis; map01100 Metabolic pathways; map01110 Biosynthesis of secondary metabolites;
3'-O-Methyltricetin	C19739	7.70565	2.5566	up	O-methylated flavonoids	NULL
Luteolin 7-O-glucuronide	C03515	0.0690838	2.4476	down	Flavones	map00944 Flavone and flavonol biosynthesis;
Diffutin	C09636	6.27568	2.4328	up	Flavans	NULL
Malonylapiin	C05622	5.12875	2.3795	up	Flavones	map00944 Flavone and flavonol biosynthesis;
Eriodictyol chalcone	C15525	0.077073	2.3552	down	Chalcones	map00941 Flavonoid biosynthesis;
Pelargonidin 3-O-beta-D-glucoside 5-O-(6-coumaroyl-beta-D-glucoside)	C16349	17.9545	2.3326	up	Anthocyanin	map00942 Anthocyanin biosynthesis;
Catechin 7-O-beta-D-xyloside	C09617	14.6377	2.3223	up	Flavan 3-ols	NULL
6-Methoxyluteolin 7-rhamnoside	C10104	7.26503	2.2909	up	Flavones	NULL
Kaempferol 3-O-beta-D-glucosylgalactoside	C16490	0.219354	2.2769	down	Flavonols	map00944 Flavone and flavonol biosynthesis;
Lonchocarpenin	C10491	0.130889	2.2712	down	3-Arylcoumarins	NULL
Malonyldaidzin	C16191	4.31448	2.2498	up	Isoflavones	map00943 Isoflavonoid biosynthesis;
Pelargonidin 3-O-3'',6''-O-dimalonylglucoside	C16288	0.247267	2.2346	down	Anthocyanin	map00942 Anthocyanin biosynthesis;
Myricitrin	C10108	8.69351	2.1923	up	Flavonols	NULL
Genistein 8-C-glucoside	C10420	4.88714	2.1879	up	Isoflavones	NULL
Quercitrin	C01750	0.122196	2.1187	down	Flavonols	map00944 Flavone and flavonol biosynthesis;

## Sheet: Table S4
Table S4. Summary Statistics of RNA-seq Results in all stem samples
Sample	Total Raw Reads(M)	Total Clean Reads(M)	Total Clean Bases(Gb)	Clean Reads Q20(%)	Clean Reads Q30(%)	Clean Reads Ratio(%)	Total MappingRatio (genome)	Uniquely MappingRatio (genome)	Total MappingRatio (gene)	Uniquely MappingRatio (gene)	Total GeneNumber	Known GeneNumber	Novel GeneNumber	Total TranscriptNumber	Known TranscriptNumber	Novel TranscriptNumber
stem_1	46.71	42.07	6.31	98.98	96.85	90.05	0.8985	0.7809	67.01	61.7	21379	18956	2423	37643	11907	25736
stem_2	48.31	43.35	6.5	99.03	96.99	89.73	0.8984	0.7816	66.07	60.72	21768	19242	2526	38300	12126	26174
stem_3	46.65	42.67	6.4	99.06	97.08	91.45	0.9162	0.8002	69.1	63.56	21512	19080	2432	37447	12061	25386
stem_4	46	42.12	6.32	99.09	97.09	91.55	0.908	0.7822	67.36	62.12	21733	19256	2477	38025	12257	25768
stem_5	47.62	43.4	6.51	99.03	96.94	91.15	0.917	0.7841	68.37	63.12	21670	19242	2428	37595	12203	25392
stem_6	45.99	41.99	6.3	99.06	97.02	91.29	0.9181	0.7884	68.74	63.51	21635	19238	2397	37827	12172	25655
stem_7	47.53	43.33	6.5	99.06	97.03	91.17	0.8623	0.75	63.24	58.41	21647	19016	2631	37423	11738	25685
stem_8	47.66	43.44	6.52	99.05	96.98	91.13	0.8749	0.7571	66.56	61.71	20487	18133	2354	35448	11171	24277
stem_9	47.7	43.29	6.49	99.01	96.88	90.75	0.8991	0.7755	68.11	63.25	20930	18506	2424	36921	11742	25179

## Sheet: Table S5
Table S5. List of information of MYB and bHLH genes
Type	Gene Name	Gene ID	Chr	Start	End	Subfamily	A. thaliana orthologs
MYB	EpMYB1	Maker00001333	Chr01	32571791	32575432	R2R3	ABS7,MYB101,ATM1,AtMYB101
MYB	EpMYB2	Maker00000319	Chr01	34224525	34228409	R2R3	MYB119,AtMYB119
MYB	EpMYB3	Maker00000435	Chr01	37527094	37527780	R2R3	MYB77
MYB	EpMYB4	Maker00001279	Chr01	38360828	38362029	R1	RAX3,MYB84,AtMYB84,SKI2
MYB	EpMYB5	Maker00001149	Chr01	38697558	38698319	R2R3	MYB66,WER1,AtMYB66,WER
MYB	EpMYB6	Maker00000202	Chr01	41492503	41492986	R1	AtMYB93,MYB93
MYB	EpMYB7	Maker00000176	Chr01	42734173	42736037	R2R3	MYB52,BW52,AtMYB52
MYB	EpMYB8	Maker00007837	Chr02	461461	461721	R2R3	MYB15,ATY19,AtMYB15
MYB	EpMYB9	Maker00007858	Chr02	1950307	1951817	R2R3	AtMYB61,MYB61
MYB	EpMYB10	Maker00006435	Chr02	2140098	2141848	R2R3	AtMYB61,MYB61
MYB	EpMYB11	Maker00008111	Chr02	2403575	2405479	R2R3	MYB112,AtMYB112
MYB	EpMYB12	Maker00006510	Chr02	3501284	3504727	R2R3	MYB21,AtMYB21,AtMYB3
MYB	EpMYB13	Maker00007239	Chr02	3567659	3570138	R1	MYB118,AtMYB118,PGA37
MYB	EpMYB14	Maker00007313	Chr02	3574265	3576051	R2R3	MYB118,AtMYB118,PGA37
MYB	EpMYB15	Maker00007617	Chr02	3578636	3579933	R2R3	MYB118,AtMYB118,PGA37
MYB	EpMYB16	Maker00006550	Chr02	4124951	4125987	R2R3	MYB40,AtMYB40
MYB	EpMYB17	Maker00006630	Chr02	5245226	5246695	R2R3	AtMYB5,MYB5
MYB	EpMYB18	Maker00007887	Chr02	5569024	5571688	R2R3	BRAVO,AtMYB56,MYB56
MYB	EpMYB19	Maker00007100	Chr02	5614913	5615353	R2R3	AtMYB60,MYB60
MYB	EpMYB20	Maker00007775	Chr02	9561348	9566255	R2R3	AtMYB27,MYB27
MYB	EpMYB21	Maker00007855	Chr02	9649502	9651540	R2R3	RAX2,MYB38,BIT1,AtMYB38
MYB	EpMYB22	Maker00006420	Chr02	11283219	11285413	R2R3	MYB14,AtMYB14,MYB14AT
MYB	EpMYB23	Maker00007206	Chr02	13096832	13098331	R2R3	MYB35,AtMYB35,TDF1
MYB	EpMYB24	Maker00006771	Chr02	13525719	13526972	R2R3	MYB30,AtMYB30
MYB	EpMYB25	Maker00007632	Chr02	13723150	13724127	R1	AtMYB36,MYB36
MYB	EpMYB26	Maker00007894	Chr02	15299287	15301173	R2R3	BW62B,BW62C,AtMYB62,MYB62
MYB	EpMYB27	Maker00008171	Chr02	15741524	15751613	3R	AtMYB4R1,MYB4R1
MYB	EpMYB28	Maker00006745	Chr02	15784728	15787235	R2R3	MYB4,AtMYB4
MYB	EpMYB29	Maker00008181	Chr02	16653510	16656169	R2R3	MYB52,BW52,AtMYB52
MYB	EpMYB30	Maker00024486	Chr02	43401873	43402301	R2R3	MYB16,ATMIXTA,AtMYB16
MYB	EpMYB31	Maker00019416	Chr03	11615054	11616758	R2R3	MYB6,AtMYB6
MYB	EpMYB32	Maker00019487	Chr03	14688172	14690025	R2R3	AtMYB9,MYB9
MYB	EpMYB33	Maker00014356	Chr03	24812587	24814894	R1	AtMYB120,MYB120
MYB	EpMYB34	Maker00014151	Chr03	25627638	25633024	R2R3	AtMYB33,MYB33
MYB	EpMYB35	Maker00003938	Chr03	31409355	31410968	R2R3	ATM4,AtMYB102,MYB102
MYB	EpMYB36	Maker00003683	Chr03	32706008	32707359	R2R3	ATM4,AtMYB102,MYB102
MYB	EpMYB37	Maker00003971	Chr03	32739533	32740455	R2R3	MYB14,AtMYB14,MYB14AT
MYB	EpMYB38	Maker00003854	Chr03	32764560	32767152	R1	MYB15,ATY19,AtMYB15
MYB	EpMYB39	Maker00004028	Chr03	32782856	32784122	R2R3	MYB15,ATY19,AtMYB15
MYB	EpMYB40	Maker00003767	Chr03	33138713	33140830	R2R3	ABS7,MYB101,ATM1,AtMYB101
MYB	EpMYB41	Maker00003993	Chr03	34193216	34194751	R2R3	AtMYB36,MYB36
MYB	EpMYB42	Maker00004096	Chr03	34900395	34901495	R2R3	MYB48,AtMYB48
MYB	EpMYB43	Maker00017936	Chr04	19882258	19883932	R2R3	ATM4,AtMYB102,MYB102
MYB	EpMYB44	Maker00017704	Chr04	21892304	21894356	R1	URP10,MYB64,AtMYB64
MYB	EpMYB45	Maker00017238	Chr04	23787623	23789558	R2R3	MYB16,ATMIXTA,AtMYB16
MYB	EpMYB46	Maker00017014	Chr04	23934262	23934804	R2R3	MYB96,MYBCOV1,AtMYB96
MYB	EpMYB47	Maker00016816	Chr04	26386415	26388746	R2R3	MYB105,LOF2,AtMYB105
MYB	EpMYB48	Maker00018290	Chr04	26442533	26444488	R2R3	AtMYB60,MYB60
MYB	EpMYB49	Maker00018431	Chr04	29442398	29444212	R2R3	AtMYB36,MYB36
MYB	EpMYB50	Maker00017717	Chr04	30650745	30651110	R2R3	MYB14,AtMYB14,MYB14AT
MYB	EpMYB51	Maker00018152	Chr04	31981177	31983325	R2R3	PFG1,AtMYB12,MYB12
MYB	EpMYB52	Maker00017944	Chr04	32256427	32257360	R2R3	MYB2,AtMYB2
MYB	EpMYB53	Maker00017541	Chr04	32260237	32261201	R2R3	MYB2,AtMYB2
MYB	EpMYB54	Maker00018158	Chr04	32461269	32463462	R2R3	AtMYB61,MYB61
MYB	EpMYB55	Maker00017835	Chr04	32594168	32595539	R2R3	AtMYB61,MYB61
MYB	EpMYB56	Maker00017689	Chr04	33867601	33874429	R2R3	ATCDC5,AtMYBCDC5,CDC5
MYB	EpMYB57	Maker00009014	Chr05	589562	591595	R2R3	MYB112,AtMYB112
MYB	EpMYB58	Maker00008746	Chr05	1413527	1414690	R2R3	AtMYB93,MYB93
MYB	EpMYB59	Maker00008663	Chr05	2221368	2222597	R2R3	AtMYB69,MYB69
MYB	EpMYB60	Maker00008794	Chr05	2569716	2570859	R2R3	MYB6,AtMYB6
MYB	EpMYB61	Maker00008847	Chr05	3708301	3710061	R2R3	AtMYB86,MYB86
MYB	EpMYB62	Maker00008587	Chr05	4335556	4343458	R2R3	MYB35,AtMYB35,TDF1
MYB	EpMYB63	Maker00021281	Chr05	4647530	4649639	R2R3	MYB94,AtMYBCP70,AtMYB94
MYB	EpMYB64	Maker00021702	Chr05	6117058	6118560	R2R3	AtMYB82,MYB82
MYB	EpMYB65	Maker00021607	Chr05	7680306	7682699	R2R3	AtMYB36,MYB36
MYB	EpMYB66	Maker00012299	Chr05	20951020	20953301	R2R3	MYB79,AtMYB79
MYB	EpMYB67	Maker00003290	Chr06	5284025	5285124	R2R3	MYB92,AtMYB92,AtMYB64
MYB	EpMYB68	Maker00019076	Chr06	7441945	7443517	R2R3	MYB6,AtMYB6
MYB	EpMYB69	Maker00018990	Chr06	8982425	8984328	R2R3	AtMYB86,MYB86
MYB	EpMYB70	Maker00018800	Chr06	9251000	9252904	R2R3	AtMYB98,MYB98
MYB	EpMYB71	Maker00018818	Chr06	10110342	10112480	R2R3	MYB94,AtMYBCP70,AtMYB94
MYB	EpMYB72	Maker00015408	Chr06	11592404	11595206	R2R3	AtMYB5,MYB5
MYB	EpMYB73	Maker00016037	Chr06	14626326	14627464	R1	MYB305,AtMYB71
MYB	EpMYB74	Maker00015803	Chr06	15147613	15150082	R2R3	MYB15,ATY19,AtMYB15
MYB	EpMYB75	Maker00015412	Chr06	16625594	16628195	R2R3	AtMYB108,BOS1,MYB108
MYB	EpMYB76	Maker00016264	Chr06	18433634	18435436	R2R3	TT2,ATTT2,MYB123,AtMYB123
MYB	EpMYB77	Maker00009536	Chr07	9523044	9524640	R2R3	AtMYB43,MYB43
MYB	EpMYB78	Maker00010278	Chr07	9815725	9816637	R1	MYB113,AtMYB113
MYB	EpMYB79	Maker00009477	Chr07	9964746	9965926	R2R3	MYB4,AtMYB4
MYB	EpMYB80	Maker00010578	Chr07	11163566	11164372	R2R3	AtMYB73,MYB73
MYB	EpMYB81	Maker00009955	Chr07	13420178	13421134	R2R3	MYBR1,AtMYBR1,AtMYB44,MYB44
MYB	EpMYB82	Maker00010013	Chr07	13863239	13864689	R2R3	RAX3,MYB84,AtMYB84,SKI2
MYB	EpMYB83	Maker00010162	Chr07	13928828	13930286	R2R3	RAX2,MYB38,BIT1,AtMYB38
MYB	EpMYB84	Maker00010600	Chr07	14409644	14411165	R2R3	MYB4,AtMYB4
MYB	EpMYB85	Maker00009976	Chr07	14437012	14438951	R2R3	AtMYB7,MYB7,ATY49
MYB	EpMYB86	Maker00010143	Chr07	14442072	14442957	R2R3	MYB66,WER1,AtMYB66,WER
MYB	EpMYB87	BGI_novel_G001198	Chr07	16355207	16361990	3R	AtMYB3R-1,MYB3R-1,PC-MYB1,MYB3R1,AtMYB3R1
MYB	EpMYB88	BGI_novel_G001196	Chr07	16364728	16372262	3R	AtMYB3R-1,MYB3R-1,PC-MYB1,MYB3R1,AtMYB3R1
MYB	EpMYB89	Maker00009707	Chr07	18837857	18839545	R2R3	MYB52,BW52,AtMYB52
MYB	EpMYB90	Maker00001763	Chr07	22622991	22627278	R2R3	AtMYB91,AS1,ATPHAN,MYB91
MYB	EpMYB91	Maker00001934	Chr07	23754022	23759614	R2R3	MYB65,AtMYB65
MYB	EpMYB92	Maker00011123	Chr07	29798103	29801338	R2R3	ABS7,MYB101,ATM1,AtMYB101
MYB	EpMYB93	Maker00013009	Chr08	15017689	15019373	R2R3	ATM4,AtMYB102,MYB102
MYB	EpMYB94	Maker00013170	Chr08	15059932	15061413	R1	MYB14,AtMYB14,MYB14AT
MYB	EpMYB95	Maker00012803	Chr08	15065394	15066526	R1	MYB14,AtMYB14,MYB14AT
MYB	EpMYB96	Maker00012629	Chr08	15088436	15089486	R1	MYB15,ATY19,AtMYB15
MYB	EpMYB97	Maker00012428	Chr08	15095976	15103261	R2R3	MYB15,ATY19,AtMYB15
MYB	EpMYB98	Maker00013083	Chr08	15124457	15126229	R1	MYB14,AtMYB14,MYB14AT
MYB	EpMYB99	Maker00012776	Chr08	15539422	15541655	R2R3	ABS7,MYB101,ATM1,AtMYB101
MYB	EpMYB100	Maker00012843	Chr08	18089633	18090851	R2R3	MYB48,AtMYB48,AtMYB48-3,AtMYB48-2,AtMYB48-1
MYB	EpMYB101	Maker00013236	Chr08	18623769	18626596	R2R3	AtMYB46,MYB46
MYB	EpMYB102	Maker00019815	Chr08	20015521	20018686	R2R3	MYB58,AtMYB58
MYB	EpMYB103	Maker00019873	Chr08	21508704	21510396	R2R3	AtMYB83,MYB83
MYB	EpMYB104	Maker00016649	Chr08	26590695	26594837	R2R3	MYB65,AtMYB65
MYB	EpMYB105	Maker00023829	Chr09	11790492	11791842	R2R3	MYB4,AtMYB4
MYB	EpMYB106	Maker00023465	Chr09	13508254	13509330	R2R3	AtMYB73,MYB73
MYB	EpMYB107	Maker00005527	Chr10	5829098	5834114	R2R3	AtMYB26,MS35,MYB26
MYB	EpMYB108	Maker00004936	Chr10	7782398	7784530	R2R3	AtMYB5,MYB5
MYB	EpMYB109	Maker00005382	Chr10	8738938	8741467	R2R3	LMI2,MYB17,AtMYB17
MYB	EpMYB110	Maker00002381	Chr10	11619255	11622780	3R	AtMYB3R5,MYB3R-5
MYB	EpMYB111	Maker00014644	Chr11	10283757	10284440	R2R3	MYB15,ATY19,AtMYB15
MYB	EpMYB112	Maker00014977	Chr11	12178445	12180276	R2R3	AtMYB26,MS35,MYB26
MYB	EpMYB113	Maker00015287	Chr11	12197054	12199360	R2R3	AtMYB26,MS35,MYB26
MYB	EpMYB114	BGI_novel_G003098	Chr11	16138305	16145308	3R	MYB3R-3,AtMYB3R3
MYB	EpMYB115	BGI_novel_G003094	Chr11	16138318	16145308	3R	AtMYB3,MYB3
MYB	EpMYB116	Maker00023165	Chr11	16172693	16177057	R2R3	AtMYB91,AS1,ATPHAN,MYB91
MYB	EpMYB117	Maker00023279	Chr11	16718490	16722189	R2R3	SRM1,AtMYB1,MYB1
MYB	EpMYB118	Maker00013934	Chr12	11057675	11058454	R2R3	MYBR1,AtMYBR1,AtMYB44,MYB44
MYB	EpMYB119	Maker00013914	Chr12	12879708	12881061	R2R3	MYB4,AtMYB4
MYB	EpMYB120	Maker00003060	Chr12	16332676	16334846	pseudo	AtMYB18,MYB18,LAF1
MYB	EpMYB121	Maker00003167	Chr12	16339116	16343412	R2R3	LMI2,MYB17,AtMYB17
MYB	EpMYB122	Maker00002686	Chr12	18228983	18231318	R2R3	PFG3,MYB111,AtMYB111
MYB	EpMYB123	Maker00020342	Chr13	3426997	3433649	R2R3	MYB88,AtMYB88
MYB	EpMYB124	Maker00020255	Chr13	9268336	9269700	3R	MYB16,ATMIXTA,AtMYB16
MYB	EpMYB125	Maker00020412	Chr13	9287091	9288679	R2R3	MYB106,AtMYB106,NOK
MYB	EpMYB126	Maker00020901	Chr13	11619401	11621190	R2R3	BW62B,BW62C,AtMYB62,MYB62
MYB	EpMYB127	Maker00020487	Chr13	12329733	12330032	R2R3	MYB4,AtMYB4
MYB	EpMYB128	Maker00011362	Chr13	16657960	16659378	R2R3	AtMYB73,MYB73
MYB	EpMYB129	Maker00011685	Chr13	18732368	18734512	R2R3	AtMYB42,MYB42
MYB	EpMYB130	Maker00012152	Chr13	19790203	19792179	R2R3	AtMYB103,MYB103
MYB	EpMYB131	Maker00011922	Chr13	22752432	22754332	pseudo	AtMYB9,MYB9
MYB	EpMYB132	Maker00004598	Chr14	2971533	2973538	R2R3	AtMYB103,MYB103
MYB	EpMYB133	Maker00004242	Chr14	3448887	3453207	3R	AtMYB3R4,MYB3R-4
MYB	EpMYB134	Maker00004406	Chr14	4250506	4252237	R2R3	AtMYB42,MYB42
MYB	EpMYB135	Maker00004321	Chr14	4817556	4818825	R2R3	AtMYB5,MYB5
MYB	EpMYB136	Maker00004767	Chr14	5759259	5761408	R2R3	AtMYB68,MYB68
MYB	EpMYB137	Maker00004612	Chr14	6435343	6436347	R2R3	AtMYB73,MYB73
MYB	EpMYB138	Maker00023000	Chr14	11472361	11473460	R2R3	AtMYB9,MYB9
MYB	EpMYB139	Maker00022583	Chr14	11488325	11489419	R2R3	AtMYB9,MYB9
MYB	EpMYB140	Maker00023111	Chr14	12733918	12736623	R2R3	MYB66,WER1,AtMYB66,WER
MYB	EpMYB141	Maker00022990	Chr14	13886419	13893616	R2R3	MYB88,AtMYB88
MYB	EpMYB142	Maker00022743	Chr14	14269362	14272165	R2R3	MYB105,LOF2,AtMYB105
MYB	EpMYB143	Maker00002509	Chr14	18014267	18015800	R2R3	BW62B,BW62C,AtMYB62,MYB62
bHLH	EpbHLH1	Maker00000043	Chr01	31221217	31226987	VII|a+b	AtbHLH65,EN103
bHLH	EpbHLH2	Maker00001432	Chr01	38305456	38307743	XII	AtbHLH74,ACE2
bHLH	EpbHLH3	Maker00000880	Chr01	40746358	40748054	IIIb	AtbHLH93,EN47
bHLH	EpbHLH4	Maker00000166	Chr01	41307465	41309230	Ib	AtbHLH96,EN15
bHLH	EpbHLH5	Maker00000716	Chr01	42971583	42973494	Ib	AtbHLH98,EN19
bHLH	EpbHLH6	Maker00006491	Chr02	714210	719720	XI	AtbHLH59,EN93
bHLH	EpbHLH7	Maker00007179	Chr02	1078787	1080928	Ib	AtbHLH96,EN15
bHLH	EpbHLH8	Maker00006380	Chr02	4796255	4801672	IIIb	AtbHLH116,EN45
bHLH	EpbHLH9	Maker00007307	Chr02	6218060	6221300	Vb	AtbHLH106,EN56
bHLH	EpbHLH10	Maker00008292	Chr02	7341770	7345561	IX	AtbHLH130,EN69
bHLH	EpbHLH11	Maker00006851	Chr02	10630182	10636245	VII|a+b	AtbHLH15,EN101
bHLH	EpbHLH12	Maker00006653	Chr02	12331226	12334723	VIII|b+c	AtbHLH69,DROP2
bHLH	EpbHLH13	Maker00006977	Chr02	13464404	13465512	XIII	AtbHLH164,
bHLH	EpbHLH14	Maker00007945	Chr02	15283963	15285604	XII	AtbHLH137,EN89
bHLH	EpbHLH15	Maker00007279	Chr02	18376316	18377020	Ia	AtbHLH126,EN3
bHLH	EpbHLH16	Maker00024558	Chr02	38870140	38875623	IVb	AtbHLH46,EN126
bHLH	EpbHLH17	Maker00019453	Chr03	12620719	12626884	IX	AtbHLH80,EN71
bHLH	EpbHLH18	Maker00014243	Chr03	28885337	28887454	VIIIa	AtbHLH52,EN124
bHLH	EpbHLH19	Maker00014133	Chr03	29366369	29368001	IVa	AtbHLH25,EN29
bHLH	EpbHLH20	Maker00003730	Chr03	31735324	31738437	IVc	AtbHLH105,EN133
bHLH	EpbHLH21	Maker00003826	Chr03	32090544	32091501	Vb	AtbHLH30,EN53
bHLH	EpbHLH22	Maker00004083	Chr03	32903859	32904899	VIIIa	AtbHLH117,EN140
bHLH	EpbHLH23	Maker00003914	Chr03	32927681	32931105	IVc	AtbHLH105,EN133
bHLH	EpbHLH24	Maker00004135	Chr03	34118440	34120129	IIIa	AtbHLH29,EN43
bHLH	EpbHLH25	Maker00004076	Chr03	35313518	35318242	IX	AtbHLH122,EN70
bHLH	EpbHLH26	Maker00018412	Chr04	19667378	19671135	IVa	AtbHLH25,EN29
bHLH	EpbHLH27	Maker00018008	Chr04	20013484	20017068	X	AtbHLH112,EN64
bHLH	EpbHLH28	Maker00018038	Chr04	21030346	21031790	Ia	AtbHLH162,
bHLH	EpbHLH29	Maker00017451	Chr04	21054939	21057275	Ia	AtbHLH162,
bHLH	EpbHLH30	Maker00017733	Chr04	21726472	21729981	Vb	AtbHLH107,EN55
bHLH	EpbHLH31	Maker00017705	Chr04	24001425	24003078	XIII	AtbHLH164,
bHLH	EpbHLH32	Maker00017698	Chr04	25520636	25524504	IIIb	AtbHLH116,EN45
bHLH	EpbHLH33	Maker00017378	Chr04	26952291	26953869	Ia	AtbHLH38,EN8
bHLH	EpbHLH34	Maker00018383	Chr04	27621603	27634703	XII	AtbHLH48,EN97
bHLH	EpbHLH35	Maker00018400	Chr04	27648999	27651519	Ia	AtbHLH38,EN8
bHLH	EpbHLH36	Maker00017672	Chr04	27656560	27659665	IX	AtbHLH130,EN69
bHLH	EpbHLH37	Maker00018558	Chr04	30146305	30234256	VI	AtbHLH15,EN101
bHLH	EpbHLH38	BGI_novel_G002352	Chr04	30779938	30782292	III|d+e	AtbHLH3,EN34
bHLH	EpbHLH39	Maker00018521	Chr04	31252293	31258055	IIIf	AtbHLH42,EN32
bHLH	EpbHLH40	BGI_novel_G002362	Chr04	32191744	32192402	VIII|b+c	AtbHLH151,EN146
bHLH	EpbHLH41	Maker00017791	Chr04	32442135	32445153	VI	AtbHLH124,EN110
bHLH	EpbHLH42	Maker00018245	Chr04	32611391	32615720	VII|a+b	AtbHLH124,EN110
bHLH	EpbHLH43	Maker00017263	Chr04	33288433	33291185	Ib	AtbHLH96,EN15
bHLH	EpbHLH44	Maker00008625	Chr05	647518	649082	XII	AtbHLH77,EN87
bHLH	EpbHLH45	Maker00008707	Chr05	2115335	2116033	VIII|b+c	AtbHLH43,EN119
bHLH	EpbHLH46	Maker00008597	Chr05	2794780	2797597	XII	AtbHLH137,EN89
bHLH	EpbHLH47	Maker00008967	Chr05	4326288	4329835	XII	AtbHLH79,EN81
bHLH	EpbHLH48	Maker00021634	Chr05	4580200	4580815	XIII	AtbHLH163,KDR
bHLH	EpbHLH49	Maker00021296	Chr05	4873144	4876313	VII|a+b	AtbHLH15,EN101
bHLH	EpbHLH50	Maker00021508	Chr05	6845915	6850136	XI	AtbHLH66,DROP1
bHLH	EpbHLH51	Maker00021561	Chr05	8216797	8223177	IIIc	AtbHLH35,EN41
bHLH	EpbHLH52	Maker00003501	Chr06	6477578	6478192	VIII|b+c	AtbHLH43,EN119
bHLH	EpbHLH53	Maker00018803	Chr06	7822731	7831314	IIIb	AtbHLH116,EN45
bHLH	EpbHLH54	Maker00018846	Chr06	7908142	7911200	XII	AtbHLH137,EN89
bHLH	EpbHLH55	Maker00018838	Chr06	9386098	9387637	Ia	AtbHLH162,
bHLH	EpbHLH56	Maker00019135	Chr06	9997694	9998851	XIII	AtbHLH135,BS1
bHLH	EpbHLH57	Maker00015442	Chr06	12499380	12554840	IX	AtbHLH128,EN74
bHLH	EpbHLH58	Maker00015391	Chr06	13016711	13020630	Ib	AtbHLH45,EN20
bHLH	EpbHLH59	Maker00015809	Chr06	13516583	13518338	Ib	AtbHLH45,EN20
bHLH	EpbHLH60	Maker00015735	Chr06	15382848	15385681	IVc	AtbHLH104,EN136
bHLH	EpbHLH61	Maker00015630	Chr06	18233024	18240552	IVd	AtbHLH41,EN51
bHLH	EpbHLH62	Maker00016254	Chr06	18961699	18967946	IIIc	AtbHLH35,EN41
bHLH	EpbHLH63	Maker00015546	Chr06	21064387	21067488	XI	AtbHLH69,DROP2
bHLH	EpbHLH64	Maker00009651	Chr07	9890046	9891273	VIII|b+c	AtbHLH54,EN114
bHLH	EpbHLH65	Maker00010626	Chr07	9907016	9908317	VIII|b+c	AtbHLH54,EN114
bHLH	EpbHLH66	Maker00009772	Chr07	11159536	11161540	Vb	AtbHLH51,EN57
bHLH	EpbHLH67	Maker00009558	Chr07	12885942	12887431	Ib	AtbHLH98,EN19
bHLH	EpbHLH68	Maker00009898	Chr07	13192053	13193027	VIII|b+c	AtbHLH88,EN118
bHLH	EpbHLH69	Maker00010106	Chr07	13226640	13229111	VII|a+b	AtbHLH24,EN99
bHLH	EpbHLH70	Maker00009727	Chr07	13535554	13539159	VIII|b+c	AtbHLH54,EN114
bHLH	EpbHLH71	Maker00009834	Chr07	13803880	13807367	XII	AtbHLH74,ACE2
bHLH	EpbHLH72	Maker00010416	Chr07	16938519	16940482	IIIb	AtbHLH93,EN47
bHLH	EpbHLH73	Maker00010345	Chr07	17281039	17282657	Vb	AtbHLH30,EN53
bHLH	EpbHLH74	Maker00009479	Chr07	17585716	17587480	Ib	AtbHLH96,EN15
bHLH	EpbHLH75	Maker00012568	Chr08	14027747	14030425	Vb	AtbHLH30,EN53
bHLH	EpbHLH76	Maker00013277	Chr08	14559265	14560644	Ia	AtbHLH162,
bHLH	EpbHLH77	Maker00012497	Chr08	18714084	18719159	IX	AtbHLH130,EN69
bHLH	EpbHLH78	Maker00019830	Chr08	20046348	20049024	VIIIa	AtbHLH53,EN123
bHLH	EpbHLH79	Maker00019908	Chr08	21224324	21227494	IX	AtbHLH130,EN69
bHLH	EpbHLH80	Maker00010982	Chr09	10009765	10011729	II	AtbHLH91,EN25
bHLH	EpbHLH81	Maker00023903	Chr09	11928397	11931879	IVb	AtbHLH121,EN138
bHLH	EpbHLH82	Maker00023670	Chr09	12569807	12571522	XII	AtbHLH74,ACE2
bHLH	EpbHLH83	Maker00023552	Chr09	13343377	13346738	Ia	AtbHLH4,EN37
bHLH	EpbHLH84	Maker00006164	Chr09	21107170	21108490	Ia	AtbHLH162,
bHLH	EpbHLH85	Maker00005102	Chr10	3303763	3307522	IVa	AtbHLH25,EN29
bHLH	EpbHLH86	Maker00005088	Chr10	3350888	3353612	IVa	AtbHLH25,EN29
bHLH	EpbHLH87	Maker00005131	Chr10	5271936	5275287	VIII|b+c	AtbHLH87,EN121
bHLH	EpbHLH88	Maker00005387	Chr10	7411921	7413925	Ib	AtbHLH57,EN12
bHLH	EpbHLH89	Maker00005335	Chr10	7603150	7604577	III|d+e	AtbHLH4,EN37
bHLH	EpbHLH90	Maker00005448	Chr10	7915978	7917805	III|d+e	AtbHLH13,EN39
bHLH	EpbHLH91	Maker00004887	Chr10	7990208	7997102	III|d+e	AtbHLH13,EN39
bHLH	EpbHLH92	Maker00002136	Chr10	10077707	10078264	VIII|b+c	#N/A
bHLH	EpbHLH93	Maker00002052	Chr10	12636480	12640225	XII	AtbHLH62,EN85
bHLH	EpbHLH94	BGI_novel_G001343	Chr10	18777715	18781404	VII|a+b	AtbHLH15,EN101
bHLH	EpbHLH95	Maker00014818	Chr11	10188644	10191554	III|d+e	AtbHLH13,EN39
bHLH	EpbHLH96	Maker00014967	Chr11	10582127	10583659	III|d+e	AtbHLH14,EN33
bHLH	EpbHLH97	Maker00015087	Chr11	10847871	10850815	Ib	AtbHLH57,EN12
bHLH	EpbHLH98	Maker00014719	Chr11	12783692	12788907	VIII|b+c	AtbHLH87,EN121
bHLH	EpbHLH99	Maker00014856	Chr11	14241350	14243253	IVa	AtbHLH19,EN26
bHLH	EpbHLH100	Maker00014850	Chr11	14259768	14260982	IVa	AtbHLH25,EN29
bHLH	EpbHLH101	Maker00014885	Chr11	14498673	14499657	IVa	AtbHLH19,EN26
bHLH	EpbHLH102	Maker00005800	Chr11	19430789	19434584	XII	AtbHLH62,EN85
bHLH	EpbHLH103	Maker00013655	Chr12	10589777	10591427	VIII|b+c	AtbHLH84,
bHLH	EpbHLH104	Maker00014088	Chr12	11249160	11250230	Ia	AtbHLH36,EN6
bHLH	EpbHLH105	Maker00013577	Chr12	11252641	11253517	Ia	AtbHLH94,EN16
bHLH	EpbHLH106	Maker00014043	Chr12	12123229	12125979	XII	AtbHLH64,EN79
bHLH	EpbHLH107	Maker00013643	Chr12	13008990	13012234	IIIb	AtbHLH33,EN44
bHLH	EpbHLH108	Maker00002890	Chr12	15842458	15849275	Ia	AtbHLH120,EN4
bHLH	EpbHLH109	Maker00003075	Chr12	15859891	15862217	Ia	AtbHLH120,EN4
bHLH	EpbHLH110	Maker00003000	Chr12	15865611	15866454	Ia	AtbHLH126,EN3
bHLH	EpbHLH111	Maker00003031	Chr12	19217705	19218951	Ia	AtbHLH42,EN32
bHLH	EpbHLH112	Maker00009383	Chr12	19389310	19390554	Ia	AtbHLH42,EN32
bHLH	EpbHLH113	Maker00009314	Chr12	20016026	20017311	Ib	AtbHLH45,EN20
bHLH	EpbHLH114	Maker00020633	Chr13	2449224	2451269	III|d+e	AtbHLH4,EN37
bHLH	EpbHLH115	Maker00020701	Chr13	3115003	3117105	Ib	AtbHLH96,EN15
bHLH	EpbHLH116	Maker00020299	Chr13	5504350	5507817	XII	AtbHLH79,EN81
bHLH	EpbHLH117	Maker00020533	Chr13	8739250	8740779	XIII	AtbHLH163,KDR
bHLH	EpbHLH118	Maker00020873	Chr13	10409698	10422520	Va	AtbHLH46,EN126
bHLH	EpbHLH119	Maker00020658	Chr13	10776595	10779072	II	AtbHLH10,EN23
bHLH	EpbHLH120	Maker00020407	Chr13	10989346	10991771	Vb	AtbHLH30,EN53
bHLH	EpbHLH121	Maker00020560	Chr13	11600703	11601839	XII	AtbHLH137,EN89
bHLH	EpbHLH122	Maker00020823	Chr13	13406559	13407776	IVa	AtbHLH19,EN26
bHLH	EpbHLH123	Maker00020880	Chr13	13408870	13412321	IVa	AtbHLH19,EN26
bHLH	EpbHLH124	Maker00012061	Chr13	14717865	14722126	IVb	AtbHLH121,EN138
bHLH	EpbHLH125	Maker00011748	Chr13	16332499	16333254	VIII|b+c	AtbHLH37,EN117
bHLH	EpbHLH126	Maker00011873	Chr13	16415094	16418231	VII|a+b	AtbHLH24,EN99
bHLH	EpbHLH127	Maker00012210	Chr13	17331924	17334447	IVa	AtbHLH25,EN29
bHLH	EpbHLH128	Maker00012137	Chr13	19538965	19543734	IIIf	AtbHLH2,EGL1
bHLH	EpbHLH129	Maker00012273	Chr13	23419981	23421972	IIIb	AtbHLH93,EN47
bHLH	EpbHLH130	Maker00004708	Chr14	2364146	2365420	III|d+e	AtbHLH14,EN33
bHLH	EpbHLH131	Maker00004238	Chr14	3167940	3173037	IIIf	AtbHLH2,EGL1
bHLH	EpbHLH132	Maker00004271	Chr14	5603297	5604447	IVa	AtbHLH25,EN29
bHLH	EpbHLH133	Maker00004561	Chr14	5609779	5610721	IVa	AtbHLH25,EN29
bHLH	EpbHLH134	Maker00004512	Chr14	5616623	5618497	IVa	AtbHLH25,EN29
bHLH	EpbHLH135	Maker00004499	Chr14	6651928	6655928	VII|a+b	AtbHLH24,EN99
bHLH	EpbHLH136	Maker00004286	Chr14	6697132	6697830	VIII|b+c	AtbHLH37,EN117
bHLH	EpbHLH137	Maker00023061	Chr14	11626270	11628282	III|d+e	AtbHLH4,EN37
bHLH	EpbHLH138	Maker00022433	Chr14	11713173	11714819	IIIb	AtbHLH93,EN47
bHLH	EpbHLH139	Maker00022925	Chr14	12135626	12140349	Vb	AtbHLH131,
bHLH	EpbHLH140	Maker00023085	Chr14	13412916	13417076	XII	AtbHLH79,EN81
bHLH	EpbHLH141	Maker00023071	Chr14	13937511	13938669	XIII	AtbHLH163,KDR
bHLH	EpbHLH142	Maker00002635	Chr14	16308961	16312934	Vb	AtbHLH30,EN53
bHLH	EpbHLH143	Maker00002522	Chr14	18072392	18072701	XII	AtbHLH78,CIB2

## Sheet: Table S6
Table S6. Differentially expressed genes between different groups
gene_id	log2Ratio (S2/S1)	Type	log2Ratio (S3/S2)	Type	Log2Ratio (S3/S1)	Type	Cellular Component	Molecular Function	Biological Process	Kegg Orthology	Nr Description
Maker00003063	2.21416	Up	NA	NA	2.99741	Up	GO:0016021//integral component of membrane	GO:0016705//oxidoreductase activity, acting on paired donors, with incorporation or reduction of molecular oxygen;GO:0020037//heme binding;GO:0005506//iron ion binding;GO:0004497//monooxygenase activity	NA	K20619//cytochrome P450 family 78 subfamily A	XP_017427256.1//PREDICTED: cytochrome P450 78A5-like [Vigna angularis]
BGI_novel_G002622	1.80131	Up	-2.8196	Down	NA	NA	NA	NA	GO:0006952//defense response;GO:0009607//response to biotic stimulus	K10745//ribonuclease H2 subunit C	ACU19047.1//unknown [Glycine max]
Maker00003131	2.11064	Up	-8.33277	Down	-6.09583	Down	NA	GO:0003723//RNA binding;GO:0033897//ribonuclease T2 activity	NA	K01166//ribonuclease T2 [EC:3.1.27.1]	XP_020204898.1//ribonuclease S-2-like [Cajanus cajan]
Maker00000289	1.98334	Up	-2.53456	Down	NA	NA	NA	GO:0017057//6-phosphogluconolactonase activity;GO:0016853//isomerase activity	GO:0006098//pentose-phosphate shunt;GO:0005975//carbohydrate metabolic process	K01057//6-phosphogluconolactonase [EC:3.1.1.31]	GAU27506.1//hypothetical protein TSUD_14860 [Trifolium subterraneum]
BGI_novel_G002988	1.64286	Up	-1.93721	Down	NA	NA	GO:0016021//integral component of membrane	NA	NA	NA	XP_006599199.1//PREDICTED: uncharacterized protein LOC100797168 [Glycine max]
BGI_novel_G002928	-1.86041	Down	NA	NA	NA	NA	GO:0009535//chloroplast thylakoid membrane	GO:0048038//quinone binding;GO:0051287//NAD binding;GO:0016655//oxidoreductase activity, acting on NAD(P)H, quinone or similar compound as acceptor	GO:0006810//transport;GO:0019684//photosynthesis, light reaction	K05579//NAD(P)H-quinone oxidoreductase subunit H [EC:1.6.5.3]	AHY33442.1//NADH-plastoquinone oxidoreductase subunit 7 (chloroplast) [Robinia pseudoacacia]
Maker00000840	3.45657	Up	-4.09725	Down	NA	NA	GO:0016021//integral component of membrane;GO:0005886//plasma membrane	GO:0005524//ATP binding;GO:0004672//protein kinase activity;GO:0004675//transmembrane receptor protein serine/threonine kinase activity	GO:0006468//protein phosphorylation;GO:0007166//cell surface receptor signaling pathway	K04733//interleukin-1 receptor-associated kinase 4 [EC:2.7.11.1]	KHN02093.1//Putative LRR receptor-like serine/threonine-protein kinase [Glycine soja]
BGI_novel_G002967	1.24678	Up	NA	NA	NA	NA	NA	NA	NA	K11838//ubiquitin carboxyl-terminal hydrolase 7 [EC:3.4.19.12];K21596//calmodulin-binding transcription activator	XP_019426717.1//PREDICTED: MATH domain and coiled-coil domain-containing protein At3g58270-like isoform X1 [Lupinus angustifolius]
Maker00022951	1.50532	Up	-1.68407	Down	NA	NA	NA	GO:0016758//transferase activity, transferring hexosyl groups	GO:0008152//metabolic process	K23154	XP_019455540.1//PREDICTED: UDP-glycosyltransferase 13-like [Lupinus angustifolius]
Maker00017649	1.36385	Up	NA	NA	NA	NA	NA	NA	NA	K15400//omega-hydroxypalmitate O-feruloyl transferase [EC:2.3.1.188];K22048//mechanosensitive ion channel protein 4/5/6/7/8/9/10	XP_007159365.1//hypothetical protein PHAVU_002G232100g [Phaseolus vulgaris]
Maker00022489	1.20595	Up	NA	NA	NA	NA	GO:0016021//integral component of membrane	NA	GO:0055114//oxidation-reduction process	K08360//cytochrome b-561 [EC:1.16.5.1]	XP_019460086.1//PREDICTED: probable transmembrane ascorbate ferrireductase 3 [Lupinus angustifolius];XP_017442826.1//PREDICTED: probable transmembrane ascorbate ferrireductase 3 [Vigna angularis]
Maker00015287	-2.09892	Down	NA	NA	-4.81664	Down	GO:0005634//nucleus	GO:0003677//DNA binding;GO:0000981//RNA polymerase II transcription factor activity, sequence-specific DNA binding;GO:0043565//sequence-specific DNA binding;GO:0044212//transcription regulatory region DNA binding;GO:0001135//transcription factor activity, RNA polymerase II transcription factor recruiting	GO:0006357//regulation of transcription from RNA polymerase II promoter;GO:0030154//cell differentiation	K09422//transcription factor MYB, plant	KHN39316.1//Transcription factor MYB86 [Glycine soja]
Maker00013249	1.98429	Up	-2.00354	Down	NA	NA	GO:0005634//nucleus	GO:0003677//DNA binding	GO:0006355//regulation of transcription, DNA-templated;GO:0006351//transcription, DNA-templated	K13126//polyadenylate-binding protein;K00521//ferric-chelate reductase [EC:1.16.1.7]	XP_003543426.1//PREDICTED: NAC domain-containing protein 90-like isoform X2 [Glycine max]
Maker00014129	1.99367	Up	NA	NA	NA	NA	GO:0016021//integral component of membrane	GO:0016614//oxidoreductase activity, acting on CH-OH group of donors;GO:0019139//cytokinin dehydrogenase activity;GO:0050660//flavin adenine dinucleotide binding	GO:0009690//cytokinin metabolic process	K00279//cytokinin dehydrogenase [EC:1.5.99.12]	XP_020208151.1//cytokinin dehydrogenase 6 [Cajanus cajan]
Maker00004853	1.55563	Up	NA	NA	NA	NA	GO:0005634//nucleus	GO:0043565//sequence-specific DNA binding;GO:0003700//DNA binding transcription factor activity	GO:0055072//iron ion homeostasis;GO:0045930//negative regulation of mitotic cell cycle;GO:0008356//asymmetric cell division;GO:0006355//regulation of transcription, DNA-templated;GO:0006351//transcription, DNA-templated;GO:0009956//radial pattern formation;GO:0048366//leaf development	K14494//DELLA protein	AIO08307.1//GRAS family transcription factor SHR2, partial [Quercus ilex]
Maker00002190	1.92412	Up	-3.56257	Down	NA	NA	NA	NA	NA	K04733//interleukin-1 receptor-associated kinase 4 [EC:2.7.11.1]	XP_011077636.1//thaumatin-like protein [Sesamum indicum];XP_020204771.1//thaumatin-like protein [Cajanus cajan]
Maker00023787	1.02272	Up	NA	NA	NA	NA	NA	GO:0004332//fructose-bisphosphate aldolase activity	GO:0006096//glycolytic process	K01623//fructose-bisphosphate aldolase, class I [EC:4.1.2.13]	XP_010066215.1//PREDICTED: fructose-bisphosphate aldolase 1, chloroplastic [Eucalyptus grandis];KCW55419.1//hypothetical protein EUGRSUZ_I01326 [Eucalyptus grandis]
Maker00007130	1.06179	Up	-1.00019	Down	NA	NA	GO:0005634//nucleus	NA	GO:0006355//regulation of transcription, DNA-templated;GO:0009734//auxin-activated signaling pathway;GO:0006351//transcription, DNA-templated	K14484//auxin-responsive protein IAA	XP_003541371.1//PREDICTED: auxin-responsive protein IAA11-like [Glycine max]
Maker00014090	-1.96406	Down	NA	NA	NA	NA	NA	GO:0050661//NADP binding;GO:0004499//N,N-dimethylaniline monooxygenase activity;GO:0050660//flavin adenine dinucleotide binding;GO:0004497//monooxygenase activity	GO:0055114//oxidation-reduction process	K00485//dimethylaniline monooxygenase (N-oxide forming) [EC:1.14.13.8]	XP_020237704.1//probable flavin-containing monooxygenase 1 [Cajanus cajan]
Maker00024206	1.31843	Up	-4.07327	Down	-2.51544	Down	NA	NA	NA	NA	XP_003594881.1//polygalacturonase QRT3-like protein [Medicago truncatula]
Maker00002921	1.43549	Up	NA	NA	NA	NA	NA	NA	NA	K10664//E3 ubiquitin-protein ligase ATL6/9/15/31/42/55 [EC:2.3.2.27]	XP_002515019.1//PREDICTED: RING-H2 finger protein ATL47 [Ricinus communis]
Maker00007677	2.36914	Up	-4.12358	Down	NA	NA	NA	NA	NA	K14411//RNA-binding protein Musashi	XP_021276774.1//protein IQ-DOMAIN 14-like [Herrania umbratica]
Maker00009929	1.0932	Up	-2.14108	Down	-1.00736	Down	NA	GO:0005524//ATP binding;GO:0004672//protein kinase activity	NA	K04733//interleukin-1 receptor-associated kinase 4 [EC:2.7.11.1]	EOY03975.1//Kinase family protein isoform 2 [Theobroma cacao];XP_017416926.1//PREDICTED: serine/threonine-protein kinase CDL1 [Vigna angularis]
Maker00004246	1.33975	Up	-4.49287	Down	-3.09431	Down	NA	GO:0004857//enzyme inhibitor activity	NA	K15334//multisite-specific tRNA:(cytosine-C5)-methyltransferase [EC:2.1.1.202];K07575//PUA domain protein	AFK39196.1//unknown [Lotus japonicus]
Maker00017383	-1.26125	Down	2.85269	Up	1.53641	Up	GO:0005634//nucleus	GO:0043565//sequence-specific DNA binding;GO:0003700//DNA binding transcription factor activity	GO:0006351//transcription, DNA-templated	K13424//WRKY transcription factor 33	XP_020232986.1//probable WRKY transcription factor 28 [Cajanus cajan];XP_015957478.1//probable WRKY transcription factor 28 [Arachis duranensis]
Maker00004290	-1.44744	Down	NA	NA	-2.46577	Down	GO:0016021//integral component of membrane	GO:0005524//ATP binding;GO:0004672//protein kinase activity	NA	K04733//interleukin-1 receptor-associated kinase 4 [EC:2.7.11.1]	XP_019446670.1//PREDICTED: LRR receptor-like serine/threonine-protein kinase GSO2 [Lupinus angustifolius]
Maker00004141	1.40918	Up	NA	NA	NA	NA	GO:0005634//nucleus	NA	GO:0051726//regulation of cell cycle	K18812//cyclin D6, plant	KHN36588.1//Putative cyclin-D6-1 [Glycine soja]
Maker00008872	2.07109	Up	NA	NA	NA	NA	NA	GO:0046872//metal ion binding;GO:0030570//pectate lyase activity	GO:0045490//pectin catabolic process	K01728//pectate lyase [EC:4.2.2.2]	AFK44189.1//unknown [Medicago truncatula]
Maker00019043	1.90547	Up	-3.3992	Down	NA	NA	NA	GO:0004185//serine-type carboxypeptidase activity	GO:0051603//proteolysis involved in cellular protein catabolic process	K16297//serine carboxypeptidase-like clade II [EC:3.4.16.-]	KHN31265.1//Serine carboxypeptidase-like 45 [Glycine soja];XP_020204311.1//serine carboxypeptidase-like 45 [Cajanus cajan]
Maker00010234	1.94083	Up	-2.29724	Down	NA	NA	NA	GO:0017057//6-phosphogluconolactonase activity;GO:0016853//isomerase activity	GO:0006098//pentose-phosphate shunt;GO:0005975//carbohydrate metabolic process	K01057//6-phosphogluconolactonase [EC:3.1.1.31]	GAU27506.1//hypothetical protein TSUD_14860 [Trifolium subterraneum]
Maker00016341	1.46	Up	NA	NA	NA	NA	GO:0005829//cytosol	GO:0008477//purine nucleosidase activity;GO:0016787//hydrolase activity	GO:0006152//purine nucleoside catabolic process	NA	XP_019439735.1//PREDICTED: uncharacterized protein LOC109345286 [Lupinus angustifolius]
Maker00000839	1.00834	Up	-1.01465	Down	NA	NA	GO:0005737//cytoplasm;GO:0019005//SCF ubiquitin ligase complex	GO:0031625//ubiquitin protein ligase binding	GO:0043161//proteasome-mediated ubiquitin-dependent protein catabolic process;GO:0030162//regulation of proteolysis;GO:0042787//protein ubiquitination involved in ubiquitin-dependent protein catabolic process	K10523//speckle-type POZ protein	EOY11904.1//BTB/POZ domain-containing protein [Theobroma cacao];XP_021287538.1//BTB/POZ domain-containing protein At1g55760 [Herrania umbratica]
BGI_novel_G002588	-3.61469	Down	NA	NA	-2.12974	Down	NA	GO:0016614//oxidoreductase activity, acting on CH-OH group of donors;GO:0050660//flavin adenine dinucleotide binding	NA	K21840//hexose oxidase [EC:1.1.3.5];K01187//alpha-glucosidase [EC:3.2.1.20]	XP_020232974.1//berberine bridge enzyme-like 15 [Cajanus cajan]
Maker00017358	2.13785	Up	-2.9032	Down	NA	NA	GO:0016021//integral component of membrane;GO:0005886//plasma membrane	GO:0004674//protein serine/threonine kinase activity;GO:0005524//ATP binding;GO:0004675//transmembrane receptor protein serine/threonine kinase activity	GO:0006468//protein phosphorylation;GO:0007166//cell surface receptor signaling pathway	K13418//somatic embryogenesis receptor kinase 1 [EC:2.7.10.1 2.7.11.1];K04733//interleukin-1 receptor-associated kinase 4 [EC:2.7.11.1]	XP_020211621.1//protein NSP-INTERACTING KINASE 1-like [Cajanus cajan];KHN30771.1//Protein NSP-INTERACTING KINASE 1 [Glycine soja]
Maker00005381	1.66807	Up	-2.51929	Down	NA	NA	GO:0010008//endosome membrane;GO:0005829//cytosol	GO:0016307//phosphatidylinositol phosphate kinase activity;GO:0046872//metal ion binding;GO:0000285//1-phosphatidylinositol-3-phosphate 5-kinase activity;GO:0005524//ATP binding	GO:0042147//retrograde transport, endosome to Golgi;GO:0046854//phosphatidylinositol phosphorylation	K00921//1-phosphatidylinositol-3-phosphate 5-kinase [EC:2.7.1.150]	XP_006583187.1//PREDICTED: 1-phosphatidylinositol-3-phosphate 5-kinase FAB1B-like [Glycine max]
Maker00022728	1.74015	Up	-3.30583	Down	NA	NA	GO:0016021//integral component of membrane	GO:0005215//transporter activity	GO:0055085//transmembrane transport	K14611//solute carrier family 23 (nucleobase transporter), member 1/2	XP_003628664.2//nucleobase-ascorbate transporter-like protein [Medicago truncatula]
Maker00011308	1.88883	Up	-3.07177	Down	NA	NA	GO:0016020//membrane;GO:0016021//integral component of membrane	NA	GO:0007165//signal transduction;GO:2000031//regulation of salicylic acid mediated signaling pathway;GO:0031347//regulation of defense response;GO:0071446//cellular response to salicylic acid stimulus	K19626//inversin;K15503//serine/threonine-protein phosphatase 6 regulatory ankyrin repeat subunit B	XP_019465019.1//PREDICTED: protein ACCELERATED CELL DEATH 6 [Lupinus angustifolius]
Maker00013942	1.88942	Up	-1.83675	Down	NA	NA	NA	NA	NA	K03165//DNA topoisomerase III [EC:5.99.1.2]	NP_001237013.2//putative GDSL/SGNH-like acyl-esterase family protein [Glycine max]
Maker00020339	2.02005	Up	-2.22271	Down	NA	NA	NA	GO:0004857//enzyme inhibitor activity	NA	K04733//interleukin-1 receptor-associated kinase 4 [EC:2.7.11.1];K01051//pectinesterase [EC:3.1.1.11]	XP_016188933.1//21 kDa protein [Arachis ipaensis]
Maker00011567	1.47975	Up	NA	NA	NA	NA	GO:0005634//nucleus;GO:0005622//intracellular	GO:0000989//transcription factor activity, transcription factor binding;GO:0008270//zinc ion binding	GO:0006355//regulation of transcription, DNA-templated;GO:0009640//photomorphogenesis	K12135//zinc finger protein CONSTANS	KRH28767.1//hypothetical protein GLYMA_11G074900 [Glycine max];XP_020978711.1//B-box zinc finger protein 18 isoform X1 [Arachis ipaensis];XP_006590310.1//PREDICTED: uncharacterized protein LOC100795117 isoform X1 [Glycine max];XP_015964224.1//B-box zinc finger protein 18 [Arachis duranensis]
BGI_novel_G002201	1.5123	Up	NA	NA	NA	NA	GO:0043231//intracellular membrane-bounded organelle	GO:0080043//quercetin 3-O-glucosyltransferase activity;GO:0080044//quercetin 7-O-glucosyltransferase activity;GO:0016758//transferase activity, transferring hexosyl groups	GO:0008152//metabolic process	K21374//7-deoxyloganetin glucosyltransferase [EC:2.4.1.324]	XP_012568096.1//PREDICTED: 7-deoxyloganetin glucosyltransferase isoform X2 [Cicer arietinum]
Maker00024131	-2.03278	Down	-3.01031	Down	-5.31196	Down	NA	GO:0004190//aspartic-type endopeptidase activity	NA	K01381//saccharopepsin [EC:3.4.23.25]	XP_019442598.1//PREDICTED: aspartic proteinase CDR1-like [Lupinus angustifolius]
Maker00011502	2.32183	Up	NA	NA	3.43549	Up	NA	NA	NA	NA	NA
Maker00011536	1.30955	Up	-2.29628	Down	NA	NA	GO:0016021//integral component of membrane	NA	GO:0045492//xylan biosynthetic process	K18801//glucuronoxylan 4-O-methyltransferase [EC:2.1.1.112]	XP_019422438.1//PREDICTED: protein IRX15-LIKE-like [Lupinus angustifolius]
Maker00008787	1.07537	Up	-2.47201	Down	-1.37513	Down	NA	NA	NA	K17592//sacsin	XP_019421490.1//PREDICTED: uncharacterized protein LOC109331444 [Lupinus angustifolius]
Maker00017327	1.21227	Up	NA	NA	NA	NA	NA	NA	NA	NA	XP_007018533.2//PREDICTED: uncharacterized protein LOC18592002 [Theobroma cacao];OMO70729.1//hypothetical protein COLO4_28531 [Corchorus olitorius]
Maker00015698	1.37055	Up	NA	NA	NA	NA	NA	NA	NA	K00660//chalcone synthase [EC:2.3.1.74]	AOX49211.1//chalcone synthase [Acacia koa]
BGI_novel_G000468	1.49512	Up	-2.68639	Down	NA	NA	NA	NA	NA	NA	AIU39184.1//trypsin inhibitor 1 [Senna obtusifolia]
Maker00010098	1.24245	Up	NA	NA	NA	NA	NA	NA	NA	NA	XP_021284019.1//ACT domain-containing protein ACR3 isoform X1 [Herrania umbratica];KRH64577.1//hypothetical protein GLYMA_04G242800 [Glycine max]
Maker00015338	1.89249	Up	-2.59414	Down	NA	NA	NA	GO:0008168//methyltransferase activity	GO:0045492//xylan biosynthetic process	K18801//glucuronoxylan 4-O-methyltransferase [EC:2.1.1.112]	XP_018813955.1//PREDICTED: glucuronoxylan 4-O-methyltransferase 3-like [Juglans regia]
Maker00009483	1.003	Up	NA	NA	NA	NA	NA	NA	NA	NA	KRH52168.1//hypothetical protein GLYMA_06G050500 [Glycine max]
Maker00017985	2.11895	Up	NA	NA	3.2058	Up	NA	GO:0004721//phosphoprotein phosphatase activity	NA	K17616//CTD small phosphatase-like protein 2 [EC:3.1.3.-]	XP_020233701.1//CTD small phosphatase-like protein 2 [Cajanus cajan]
Maker00012371	1.07812	Up	NA	NA	NA	NA	GO:0010287//plastoglobule;GO:0009535//chloroplast thylakoid membrane;GO:0009523//photosystem II;GO:0016021//integral component of membrane;GO:0009941//chloroplast envelope;GO:0009522//photosystem I	GO:0031409//pigment binding;GO:0016168//chlorophyll binding	GO:0009768//photosynthesis, light harvesting in photosystem I;GO:0009765//photosynthesis, light harvesting;GO:0009416//response to light stimulus;GO:0018298//protein-chromophore linkage	K08914//light-harvesting complex II chlorophyll a/b binding protein 3	XP_015953926.1//chlorophyll a-b binding protein 13, chloroplastic [Arachis duranensis]
Maker00015648	-1.92962	Down	NA	NA	-2.32322	Down	GO:0005634//nucleus	GO:0003677//DNA binding;GO:0003700//DNA binding transcription factor activity	GO:0006351//transcription, DNA-templated	K14516//ethylene-responsive transcription factor 1	XP_021675606.1//ethylene-responsive transcription factor 1B-like [Hevea brasiliensis]
Maker00006443	1.04535	Up	-1.63747	Down	NA	NA	GO:0005634//nucleus	GO:0003677//DNA binding	GO:0006355//regulation of transcription, DNA-templated;GO:0006351//transcription, DNA-templated	K00521//ferric-chelate reductase [EC:1.16.1.7]	XP_019433246.1//PREDICTED: NAC domain-containing protein 83-like [Lupinus angustifolius]
Maker00021951	2.13893	Up	-3.20959	Down	NA	NA	GO:0005634//nucleus	GO:0043565//sequence-specific DNA binding;GO:0046982//protein heterodimerization activity	GO:0006355//regulation of transcription, DNA-templated	K08065//nuclear transcription Y subunit beta	XP_013460047.1//nuclear transcription factor Y protein [Medicago truncatula];XP_008342239.1//PREDICTED: nuclear transcription factor Y subunit B-3-like isoform X1 [Malus domestica]
Maker00004137	2.52835	Up	-3.43486	Down	NA	NA	GO:0009506//plasmodesma;GO:0005576//extracellular region	NA	GO:0019953//sexual reproduction;GO:0006949//syncytium formation	K20628//expansin	XP_020235471.1//expansin-B3 [Cajanus cajan]
Maker00017936	-1.6875	Down	NA	NA	NA	NA	NA	GO:0003677//DNA binding	NA	K09422//transcription factor MYB, plant	XP_020221590.1//myb-related protein Hv1-like [Cajanus cajan]
Maker00023267	1.77892	Up	NA	NA	NA	NA	NA	GO:0000287//magnesium ion binding;GO:0016831//carboxy-lyase activity;GO:0030976//thiamine pyrophosphate binding	NA	K01568//pyruvate decarboxylase [EC:4.1.1.1]	GAU35096.1//hypothetical protein TSUD_162000 [Trifolium subterraneum];OMO84991.1//hypothetical protein CCACVL1_10482 [Corchorus capsularis]
Maker00021222	2.08977	Up	-2.34896	Down	NA	NA	NA	NA	NA	NA	XP_019441129.1//PREDICTED: protein EXORDIUM-like 5 [Lupinus angustifolius]
Maker00011443	1.18341	Up	-1.18511	Down	NA	NA	GO:0031982//vesicle	NA	GO:0006898//receptor-mediated endocytosis	K18626//trichohyalin	KYP66796.1//UBA domain-containing protein 7 [Cajanus cajan];XP_020216556.1//auxilin-like protein 1 [Cajanus cajan]
Maker00012005	1.37411	Up	-4.24643	Down	-2.70892	Down	NA	NA	NA	NA	XP_006601466.1//PREDICTED: uncharacterized protein LOC102662938 [Glycine max]
Maker00006310	2.15631	Up	-3.30145	Down	NA	NA	GO:0044611//nuclear pore inner ring	GO:0017056//structural constituent of nuclear pore	GO:0006999//nuclear pore organization	NA	XP_019438680.1//PREDICTED: uncharacterized protein LOC109344374 isoform X2 [Lupinus angustifolius]
Maker00001690	1.33868	Up	-1.67294	Down	NA	NA	NA	GO:0016788//hydrolase activity, acting on ester bonds	GO:0008152//metabolic process	K01114//phospholipase C [EC:3.1.4.3]	XP_016197085.1//non-specific phospholipase C2 isoform X1 [Arachis ipaensis]
Maker00017423	1.05737	Up	NA	NA	NA	NA	NA	GO:0016758//transferase activity, transferring hexosyl groups	GO:0008152//metabolic process	K13496//UDP-glucosyl transferase 73C [EC:2.4.1.-]	XP_014497250.1//PREDICTED: UDP-glycosyltransferase 90A1-like [Vigna radiata var. radiata]
Maker00014946	3.54142	Up	-7.27296	Down	-2.96594	Down	GO:0005622//intracellular	GO:0004871//signal transducer activity	GO:0000160//phosphorelay signal transduction system	K14490//histidine-containing phosphotransfer peotein	XP_020228933.1//histidine-containing phosphotransfer protein 4 [Cajanus cajan]
Maker00017590	3.01645	Up	-3.51166	Down	NA	NA	GO:0016021//integral component of membrane	GO:0004553//hydrolase activity, hydrolyzing O-glycosyl compounds	GO:0005975//carbohydrate metabolic process	K15920//xylan 1,4-beta-xylosidase [EC:3.2.1.37]	XP_020220687.1//beta-xylosidase/alpha-L-arabinofuranosidase 1 [Cajanus cajan]
BGI_novel_G000363	-2.00154	Down	NA	NA	-2.49202	Down	GO:0016021//integral component of membrane	GO:0016758//transferase activity, transferring hexosyl groups	GO:0008152//metabolic process	K12938//anthocyanidin 5,3-O-glucosyltransferase [EC:2.4.1.-];K21370//baicalein 7-O-glucuronosyltransferase [EC:2.4.1.253];K13263//isoflavone 7-O-glucosyltransferase [EC:2.4.1.170];K08237//hydroquinone glucosyltransferase [EC:2.4.1.218]	XP_019440920.1//PREDICTED: UDP-glycosyltransferase 88F5-like isoform X1 [Lupinus angustifolius]
Maker00012877	1.62495	Up	-1.79106	Down	NA	NA	NA	GO:0008171//O-methyltransferase activity;GO:0046983//protein dimerization activity	NA	K16040//trans-resveratrol di-O-methyltransferase [EC:2.1.1.240]	XP_007043543.1//PREDICTED: (R,S)-reticuline 7-O-methyltransferase [Theobroma cacao];XP_015880641.1//PREDICTED: (R,S)-reticuline 7-O-methyltransferase-like [Ziziphus jujuba];XP_021297329.1//(R,S)-reticuline 7-O-methyltransferase-like isoform X2 [Herrania umbratica]
Maker00021392	1.31735	Up	-3.16934	Down	-1.80037	Down	NA	NA	NA	K13420//LRR receptor-like serine/threonine-protein kinase FLS2 [EC:2.7.11.1]	XP_003556064.1//PREDICTED: leucine-rich repeat extensin-like protein 6 [Glycine max]
BGI_novel_G002579	1.04695	Up	-4.3009	Down	-3.19864	Down	NA	GO:0008171//O-methyltransferase activity;GO:0046983//protein dimerization activity	NA	K21553//isoliquiritigenin 2'-O-methyltransferase [EC:2.1.1.154]	XP_004496361.1//PREDICTED: isoliquiritigenin 2'-O-methyltransferase [Cicer arietinum]
Maker00019112	1.10209	Up	-2.25807	Down	NA	NA	GO:0016021//integral component of membrane;GO:0046658//anchored component of plasma membrane	GO:0004553//hydrolase activity, hydrolyzing O-glycosyl compounds;GO:0030247//polysaccharide binding	NA	K22832	NP_001236488.1//uncharacterized protein LOC100500078 precursor [Glycine max]
Maker00008201	1.09403	Up	NA	NA	NA	NA	GO:0016021//integral component of membrane	GO:0015299//solute:proton antiporter activity	NA	NA	XP_019454524.1//PREDICTED: cation/H(+) antiporter 20 isoform X2 [Lupinus angustifolius]
Maker00008084	1.53658	Up	-2.70724	Down	-1.11709	Down	NA	NA	NA	NA	ACU15513.1//unknown [Glycine max]
BGI_novel_G002797	1.53383	Up	NA	NA	NA	NA	GO:0016021//integral component of membrane	GO:0005524//ATP binding;GO:0004672//protein kinase activity;GO:0030247//polysaccharide binding	NA	K04733//interleukin-1 receptor-associated kinase 4 [EC:2.7.11.1]	XP_020981283.1//LEAF RUST 10 DISEASE-RESISTANCE LOCUS RECEPTOR-LIKE PROTEIN KINASE-like 2.3 isoform X2 [Arachis duranensis]
Maker00014509	-1.87956	Down	NA	NA	NA	NA	NA	NA	NA	K19784	GAU20904.1//hypothetical protein TSUD_120960 [Trifolium subterraneum]
Maker00006650	1.11439	Up	-1.66077	Down	NA	NA	GO:0016021//integral component of membrane	GO:0005524//ATP binding;GO:0004672//protein kinase activity	NA	K04733//interleukin-1 receptor-associated kinase 4 [EC:2.7.11.1]	EEF50023.1//Interleukin-1 receptor-associated kinase, putative [Ricinus communis];XP_018844288.1//PREDICTED: probable receptor-like protein kinase At2g42960 [Juglans regia]
Maker00014258	-1.33949	Down	NA	NA	NA	NA	NA	GO:0046592//polyamine oxidase activity;GO:0016491//oxidoreductase activity	NA	K13366//polyamine oxidase [EC:1.5.3.14 1.5.3.16 1.5.3.-]	XP_021673802.1//polyamine oxidase 1-like isoform X1 [Hevea brasiliensis]
Maker00000874	2.22994	Up	-4.78924	Down	NA	NA	NA	NA	NA	K13993//HSP20 family protein	XP_019416317.1//PREDICTED: 17.9 kDa class II heat shock protein-like [Lupinus angustifolius];NP_001295738.1//17.9 kDa class II heat shock protein-like [Jatropha curcas]
Maker00023176	1.04364	Up	-2.57644	Down	-1.48221	Down	GO:0016021//integral component of membrane;GO:0005886//plasma membrane	GO:0015171//amino acid transmembrane transporter activity	GO:0003333//amino acid transmembrane transport	K13946//auxin influx carrier (AUX1 LAX family)	XP_015950287.1//auxin transporter-like protein 2 [Arachis duranensis]
Maker00013345	2.28715	Up	-2.89532	Down	NA	NA	NA	NA	NA	NA	XP_007038337.2//PREDICTED: uncharacterized protein LOC18605328 [Theobroma cacao]
Maker00006865	-1.46339	Down	NA	NA	NA	NA	GO:0005829//cytosol	GO:0004385//guanylate kinase activity	NA	K00942//guanylate kinase [EC:2.7.4.8]	XP_003625152.1//guanylate kinase-like protein [Medicago truncatula]
Maker00023303	2.02969	Up	NA	NA	NA	NA	NA	GO:0004190//aspartic-type endopeptidase activity	NA	K05909//laccase [EC:1.10.3.2];K01381//saccharopepsin [EC:3.4.23.25]	XP_020206919.1//aspartic proteinase PCS1 [Cajanus cajan]
Maker00006790	1.7567	Up	-2.46156	Down	NA	NA	NA	GO:0004866//endopeptidase inhibitor activity	NA	NA	AMK79474.1//trypsin inhibitor 2, partial [Senna obtusifolia]
Maker00005075	1.59156	Up	-2.01467	Down	NA	NA	GO:0016021//integral component of membrane	GO:0004674//protein serine/threonine kinase activity;GO:0005524//ATP binding	NA	K04733//interleukin-1 receptor-associated kinase 4 [EC:2.7.11.1]	XP_004510591.1//PREDICTED: protein STRUBBELIG-RECEPTOR FAMILY 6 [Cicer arietinum]
BGI_novel_G002770	1.78555	Up	NA	NA	NA	NA	NA	NA	NA	K14504//xyloglucan:xyloglucosyl transferase TCH4 [EC:2.4.1.207]	XP_021655226.1//probable xyloglucan endotransglucosylase/hydrolase protein 23 [Hevea brasiliensis]
Maker00022930	-1.36235	Down	NA	NA	-1.4001	Down	GO:0016021//integral component of membrane	NA	GO:0055085//transmembrane transport	K07088//uncharacterized protein	XP_020203336.1//protein PIN-LIKES 3-like [Cajanus cajan]
BGI_novel_G001386	-7.39674	Down	NA	NA	NA	NA	GO:0005576//extracellular region	NA	GO:0019953//sexual reproduction	K20628//expansin	XP_020216314.1//expansin-like B1 [Cajanus cajan]
Maker00004889	-1.68055	Down	1.49343	Up	NA	NA	NA	GO:0008483//transaminase activity;GO:0030170//pyridoxal phosphate binding	GO:0009058//biosynthetic process	K15849//bifunctional aspartate aminotransferase and glutamate/aspartate-prephenate aminotransferase [EC:2.6.1.1 2.6.1.78 2.6.1.79];K07767//katanin p60 ATPase-containing subunit A1 [EC:3.6.4.3];K00837	ONI16043.1//hypothetical protein PRUPE_3G075300 [Prunus persica];XP_019443407.1//PREDICTED: uncharacterized protein LOC109347794 [Lupinus angustifolius];XP_009339013.1//PREDICTED: uncharacterized protein LOC103931295 [Pyrus x bretschneideri];XP_021817955.1//aromatic aminotransferase ISS1 [Prunus avium]
Maker00012321	-2.44169	Down	NA	NA	-2.40155	Down	GO:0016021//integral component of membrane	NA	NA	NA	XP_016174100.1//uncharacterized protein LOC107616658 [Arachis ipaensis]
Maker00003734	-1.86554	Down	NA	NA	NA	NA	NA	NA	NA	K12471//epsin	XP_016187291.1//epsin-3 [Arachis ipaensis]
Maker00021666	2.00085	Up	NA	NA	NA	NA	NA	NA	NA	K11982//E3 ubiquitin-protein ligase RNF115/126 [EC:2.3.2.27]	XP_017428853.1//PREDICTED: probable E3 ubiquitin-protein ligase RHC2A [Vigna angularis]
Maker00015224	-1.85341	Down	NA	NA	NA	NA	NA	NA	NA	K16280//E3 ubiquitin-protein ligase RGLG [EC:2.3.2.27];K10691//E3 ubiquitin-protein ligase UBR4 [EC:2.3.2.27];K21026//acetylajmaline esterase [EC:3.1.1.80];K14209//solute carrier family 36 (proton-coupled amino acid transporter);K00679//phospholipid:diacylglycerol acyltransferase [EC:2.3.1.158];K01188//beta-glucosidase [EC:3.2.1.21]	XP_015948228.1//GDSL esterase/lipase 5 [Arachis duranensis];XP_020228390.1//GDSL esterase/lipase 5-like [Cajanus cajan]
Maker00014685	1.0851	Up	NA	NA	1.56728	Up	GO:0005634//nucleus	GO:0003677//DNA binding	GO:0006355//regulation of transcription, DNA-templated;GO:0006351//transcription, DNA-templated	K12133//MYB-related transcription factor LHY	XP_020211115.1//protein LHY isoform X2 [Cajanus cajan];NP_001235187.2//late elongated hypocotyl and circadian clock associated-1-like protein 1 [Glycine max]
BGI_novel_G002018	-2.64254	Down	-3.82146	Down	-6.75054	Down	NA	NA	NA	K19893//glucan endo-1,3-beta-glucosidase 5/6 [EC:3.2.1.39];K19891//glucan endo-1,3-beta-glucosidase 1/2/3 [EC:3.2.1.39]	AOX49223.1//beta-1,3-glucanase [Acacia koa]
Maker00010326	2.32769	Up	NA	NA	NA	NA	GO:0016021//integral component of membrane;GO:0005886//plasma membrane	GO:0016760//cellulose synthase (UDP-forming) activity;GO:0046872//metal ion binding	GO:0030244//cellulose biosynthetic process;GO:0071555//cell wall organization	K10999//cellulose synthase A [EC:2.4.1.12]	XP_021670977.1//cellulose synthase A catalytic subunit 1 [UDP-forming] [Hevea brasiliensis];XP_015971910.1//cellulose synthase A catalytic subunit 1 [UDP-forming] [Arachis duranensis]
Maker00010360	1.06485	Up	NA	NA	1.48712	Up	NA	NA	NA	NA	XP_016169341.1//protein SPA, chloroplastic [Arachis ipaensis]
Maker00013219	2.46421	Up	-4.66396	Down	-2.16808	Down	GO:0016021//integral component of membrane	NA	NA	NA	XP_006451930.1//hypothetical protein CICLE_v10009639mg [Citrus clementina]
Maker00019272	1.4925	Up	NA	NA	1.88604	Up	GO:0016021//integral component of membrane	NA	NA	NA	NP_001242649.1//uncharacterized protein LOC100803518 precursor [Glycine max]
Maker00020310	1.57979	Up	NA	NA	2.21871	Up	NA	NA	NA	K13081//leucoanthocyanidin reductase [EC:1.17.1.3]	AEE98379.1//leucoanthocyanidin reductase [Onobrychis viciifolia];XP_017413424.1//PREDICTED: leucoanthocyanidin reductase-like [Vigna angularis]
Maker00020327	1.10842	Up	NA	NA	NA	NA	GO:0016021//integral component of membrane	GO:0016491//oxidoreductase activity	GO:0006629//lipid metabolic process	K21734//sphingolipid 8-(E/Z)-desaturase [EC:1.14.19.29]	XP_017969498.1//PREDICTED: delta(8)-fatty-acid desaturase 2 [Theobroma cacao]
Maker00017157	1.47677	Up	-1.64132	Down	NA	NA	GO:0016593//Cdc73/Paf1 complex	GO:0003677//DNA binding	GO:0006368//transcription elongation from RNA polymerase II promoter;GO:0016570//histone modification	K15178//RNA polymerase-associated protein RTF1	NP_001237907.2//uncharacterized protein LOC100500427 [Glycine max];XP_017418242.1//PREDICTED: protein RTF1 homolog [Vigna angularis]
Maker00011618	1.27386	Up	-1.08191	Down	NA	NA	NA	GO:0016740//transferase activity	NA	K15692//E3 ubiquitin-protein ligase RNF13 [EC:2.3.2.27]	XP_017428784.1//PREDICTED: thiosulfate sulfurtransferase 18-like [Vigna angularis]
Maker00024119	1.0524	Up	NA	NA	NA	NA	NA	NA	NA	K12236//transcriptional repressor NF-X1	AFK44791.1//unknown [Lotus japonicus]
Maker00021200	2.06638	Up	-4.17631	Down	-1.9846	Down	GO:0016020//membrane;GO:0005618//cell wall	GO:0004252//serine-type endopeptidase activity	NA	K12619//5'-3' exoribonuclease 2 [EC:3.1.13.-];K13199//plasminogen activator inhibitor 1 RNA-binding protein;K15333//tRNA guanosine-2'-O-methyltransferase [EC:2.1.1.34];K13124//mitogen-activated protein kinase organizer 1;K14568//rRNA small subunit pseudouridine methyltransferase Nep1 [EC:2.1.1.260]	XP_012573412.1//PREDICTED: subtilisin-like protease SBT2.5 [Cicer arietinum];XP_020227255.1//subtilisin-like protease SBT2.5 [Cajanus cajan]
Maker00020405	1.55489	Up	-4.49651	Down	-2.86721	Down	GO:0016021//integral component of membrane	NA	NA	K04733//interleukin-1 receptor-associated kinase 4 [EC:2.7.11.1];K04730//interleukin-1 receptor-associated kinase 1 [EC:2.7.11.1]	XP_017971991.1//PREDICTED: cysteine-rich repeat secretory protein 12 [Theobroma cacao];XP_009351533.1//PREDICTED: cysteine-rich repeat secretory protein 12 [Pyrus x bretschneideri]
BGI_novel_G000088	-2.18034	Down	NA	NA	NA	NA	GO:0005829//cytosol	GO:0008270//zinc ion binding;GO:0016874//ligase activity	NA	NA	XP_006575432.1//PREDICTED: E3 ubiquitin-protein ligase listerin [Glycine max]
Maker00019840	1.82595	Up	-2.45074	Down	NA	NA	NA	NA	NA	K10352//myosin heavy chain;K20283//golgin subfamily A member 4	XP_006592232.1//PREDICTED: interactor of constitutive active ROPs 3 isoform X2 [Glycine max];XP_003539735.1//PREDICTED: interactor of constitutive active ROPs 3 isoform X1 [Glycine max]
Maker00019029	2.10036	Up	NA	NA	NA	NA	GO:0043231//intracellular membrane-bounded organelle	GO:0080043//quercetin 3-O-glucosyltransferase activity;GO:0080044//quercetin 7-O-glucosyltransferase activity;GO:0016758//transferase activity, transferring hexosyl groups	GO:0008152//metabolic process	K13496//UDP-glucosyl transferase 73C [EC:2.4.1.-];K18655//ATP-dependent RNA helicase DDX19/DBP5 [EC:3.6.4.13]	XP_003528248.1//PREDICTED: UDP-glycosyltransferase 89B1 [Glycine max]
Maker00017494	2.01929	Up	-5.01657	Down	-2.99906	Down	GO:0016021//integral component of membrane	GO:0016788//hydrolase activity, acting on ester bonds	NA	K10691//E3 ubiquitin-protein ligase UBR4 [EC:2.3.2.27];K14209//solute carrier family 36 (proton-coupled amino acid transporter);K01188//beta-glucosidase [EC:3.2.1.21];K00679//phospholipid:diacylglycerol acyltransferase [EC:2.3.1.158];K01206//alpha-L-fucosidase [EC:3.2.1.51]	XP_006580187.1//PREDICTED: GDSL esterase/lipase At1g29670-like isoform X1 [Glycine max]
Maker00015011	1.46482	Up	-3.70739	Down	-2.13908	Down	NA	GO:0016788//hydrolase activity, acting on ester bonds	NA	K10691//E3 ubiquitin-protein ligase UBR4 [EC:2.3.2.27];K01188//beta-glucosidase [EC:3.2.1.21];K14209//solute carrier family 36 (proton-coupled amino acid transporter);K00679//phospholipid:diacylglycerol acyltransferase [EC:2.3.1.158];K01206//alpha-L-fucosidase [EC:3.2.1.51]	XP_020227207.1//GDSL esterase/lipase APG-like [Cajanus cajan]
Maker00002632	2.36026	Up	NA	NA	NA	NA	NA	NA	NA	K14431//transcription factor TGA	XP_021299702.1//transcription factor TGA2.3 isoform X2 [Herrania umbratica]
Maker00003967	1.19091	Up	-2.31667	Down	NA	NA	NA	NA	NA	NA	XP_015873157.1//PREDICTED: fasciclin-like arabinogalactan protein 15 [Ziziphus jujuba]
BGI_novel_G000446	-2.51619	Down	3.89911	Up	NA	NA	NA	GO:0052692//raffinose alpha-galactosidase activity	GO:0005975//carbohydrate metabolic process	K07407//alpha-galactosidase [EC:3.2.1.22]	KHM99768.1//Alpha-galactosidase [Glycine soja]
Maker00016425	2.54289	Up	NA	NA	NA	NA	NA	GO:0004857//enzyme inhibitor activity	NA	K07575//PUA domain protein	XP_017416595.1//PREDICTED: cell wall / vacuolar inhibitor of fructosidase 1-like [Vigna angularis]
Maker00008632	1.29285	Up	-2.13114	Down	NA	NA	NA	GO:0004190//aspartic-type endopeptidase activity	GO:0006508//proteolysis;GO:0030163//protein catabolic process;GO:0006629//lipid metabolic process	K08245//phytepsin [EC:3.4.23.40]	KYP57769.1//Aspartic proteinase [Cajanus cajan];XP_004508063.1//PREDICTED: cyprosin-like [Cicer arietinum]
Maker00007004	1.12441	Up	-1.38675	Down	NA	NA	GO:0016021//integral component of membrane	GO:0005524//ATP binding;GO:0004672//protein kinase activity	NA	K13420//LRR receptor-like serine/threonine-protein kinase FLS2 [EC:2.7.11.1]	XP_020205980.1//probable inactive leucine-rich repeat receptor-like protein kinase At3g03770 [Cajanus cajan]
Maker00000502	1.46112	Up	NA	NA	NA	NA	GO:0016021//integral component of membrane	GO:0005524//ATP binding;GO:0004672//protein kinase activity	NA	K04733//interleukin-1 receptor-associated kinase 4 [EC:2.7.11.1]	XP_020217104.1//probable inactive receptor kinase At4g23740 [Cajanus cajan]
Maker00018496	-2.43627	Down	-4.06379	Down	-6.78002	Down	GO:0005773//vacuole	GO:0004185//serine-type carboxypeptidase activity	GO:0051603//proteolysis involved in cellular protein catabolic process	K16297//serine carboxypeptidase-like clade II [EC:3.4.16.-]	XP_013457097.1//serine carboxypeptidase-like protein [Medicago truncatula]
Maker00018260	1.71909	Up	NA	NA	NA	NA	NA	GO:0008270//zinc ion binding;GO:0004089//carbonate dehydratase activity	GO:0015976//carbon utilization	K01673//carbonic anhydrase [EC:4.2.1.1]	XP_020220535.1//beta carbonic anhydrase 5, chloroplastic [Cajanus cajan]
Maker00001775	-1.16155	Down	1.73286	Up	NA	NA	GO:0016021//integral component of membrane	GO:0043531//ADP binding	GO:0007165//signal transduction	K22038//volume-regulated anion channel;K19613//leucine-rich repeat protein SHOC2	XP_013461108.1//disease resistance protein (TIR-NBS-LRR class), putative [Medicago truncatula]
Maker00020910	1.94321	Up	NA	NA	NA	NA	NA	NA	NA	K22455	XP_020215243.1//formin-I-like isoform X1 [Cajanus cajan];XP_020215251.1//formin-I-like isoform X2 [Cajanus cajan]
Maker00008085	1.42883	Up	-1.44879	Down	NA	NA	GO:0005634//nucleus	NA	GO:0006355//regulation of transcription, DNA-templated;GO:0009734//auxin-activated signaling pathway;GO:0006351//transcription, DNA-templated	K14484//auxin-responsive protein IAA	XP_007152862.1//hypothetical protein PHAVU_004G166400g [Phaseolus vulgaris]
Maker00013790	1.12315	Up	-1.0045	Down	NA	NA	NA	NA	NA	K10352//myosin heavy chain;K04514;K20283//golgin subfamily A member 4;K20478//golgin subfamily B member 1	KHN43054.1//Filament-like plant protein 7, partial [Glycine soja];XP_003528519.1//PREDICTED: filament-like plant protein 7 [Glycine max]
Maker00008740	1.12184	Up	NA	NA	NA	NA	GO:0005749//mitochondrial respiratory chain complex II, succinate dehydrogenase complex (ubiquinone)	GO:0005516//calmodulin binding	GO:0006950//response to stress	K21989//calcium permeable stress-gated cation channel	XP_004138127.1//PREDICTED: succinate dehydrogenase subunit 7B, mitochondrial [Cucumis sativus];XP_006600657.2//PREDICTED: calmodulin-binding protein 60 A-like [Glycine max];CBI15079.3//unnamed protein product, partial [Vitis vinifera]
Maker00011958	-1.0855	Down	NA	NA	-2.17425	Down	GO:0005634//nucleus	GO:0003677//DNA binding	GO:0006355//regulation of transcription, DNA-templated;GO:0006351//transcription, DNA-templated	K12862//pleiotropic regulator 1;K03094//S-phase kinase-associated protein 1;K13126//polyadenylate-binding protein;K00521//ferric-chelate reductase [EC:1.16.1.7];K05941//glutathione gamma-glutamylcysteinyltransferase [EC:2.3.2.15];K16296//serine carboxypeptidase-like clade I [EC:3.4.16.-]	XP_020227944.1//NAC domain-containing protein 86-like [Cajanus cajan]
Maker00000080	2.0476	Up	-4.12186	Down	-2.03701	Down	GO:0016021//integral component of membrane	NA	NA	NA	XP_014625482.1//PREDICTED: protein trichome birefringence-like 33 [Glycine max]
Maker00001817	1.80122	Up	-4.89212	Down	-3.00197	Down	NA	GO:0004553//hydrolase activity, hydrolyzing O-glycosyl compounds	GO:0005975//carbohydrate metabolic process	K19892//glucan endo-1,3-beta-glucosidase 4 [EC:3.2.1.39];K19891//glucan endo-1,3-beta-glucosidase 1/2/3 [EC:3.2.1.39]	XP_006447645.1//hypothetical protein CICLE_v10015086mg [Citrus clementina]
Maker00021188	2.9256	Up	-4.1215	Down	NA	NA	GO:0016021//integral component of membrane;GO:0046658//anchored component of plasma membrane	GO:0004553//hydrolase activity, hydrolyzing O-glycosyl compounds;GO:0030247//polysaccharide binding	NA	K22832	XP_017408434.1//PREDICTED: PLASMODESMATA CALLOSE-BINDING PROTEIN 3-like [Vigna angularis]
Maker00021028	2.60249	Up	-4.06881	Down	NA	NA	GO:0005742//mitochondrial outer membrane translocase complex;GO:0005741//mitochondrial outer membrane	GO:0015266//protein channel activity	GO:0055085//transmembrane transport;GO:0030150//protein import into mitochondrial matrix	K11518//mitochondrial import receptor subunit TOM40	XP_002264051.1//PREDICTED: mitochondrial import receptor subunit TOM40-1 [Vitis vinifera];XP_007223646.2//mitochondrial import receptor subunit TOM40-1 [Prunus persica]
Maker00014897	1.53604	Up	-1.88749	Down	NA	NA	NA	NA	NA	NA	XP_019455219.1//PREDICTED: uncharacterized protein LOC109356352 [Lupinus angustifolius]
Maker00001991	-1.51023	Down	NA	NA	NA	NA	NA	NA	NA	NA	YP_009383098.1//hypothetical protein RF1 (chloroplast) [Archidendron lucyi]
Maker00009513	-2.13369	Down	3.42235	Up	NA	NA	NA	GO:0046872//metal ion binding;GO:0051213//dioxygenase activity;GO:0016707//gibberellin 3-beta-dioxygenase activity;GO:0016491//oxidoreductase activity	GO:0009416//response to light stimulus;GO:0009686//gibberellin biosynthetic process;GO:0009740//gibberellic acid mediated signaling pathway	K04124//gibberellin 3-beta-dioxygenase [EC:1.14.11.15]	XP_007161254.1//hypothetical protein PHAVU_001G055000g [Phaseolus vulgaris]
Maker00020730	1.22168	Up	-3.32593	Down	-2.07219	Down	GO:0016021//integral component of membrane	NA	NA	K22733;K02941//large subunit ribosomal protein LP0	XP_008236140.1//PREDICTED: uncharacterized protein At1g04910 isoform X2 [Prunus mume]
Maker00010482	1.20503	Up	NA	NA	1.66214	Up	NA	NA	NA	K21843//tetratricopeptide repeat protein 7	KRH61413.1//hypothetical protein GLYMA_04G045800 [Glycine max];XP_003523621.1//PREDICTED: uncharacterized protein LOC100780807 [Glycine max]
Maker00002024	3.14709	Up	NA	NA	NA	NA	NA	NA	NA	K08059//interferon, gamma-inducible protein 30	XP_006576222.1//PREDICTED: uncharacterized protein LOC100784702 isoform X1 [Glycine max]
Maker00010264	2.23653	Up	NA	NA	1.71093	Up	GO:0016021//integral component of membrane	NA	NA	NA	XP_007136064.1//hypothetical protein PHAVU_009G014800g [Phaseolus vulgaris]
Maker00006355	2.28166	Up	-3.98296	Down	NA	NA	GO:0000139//Golgi membrane	GO:0015018//galactosylgalactosylxylosylprotein 3-beta-glucuronosyltransferase activity;GO:0042285//xylosyltransferase activity	GO:0071555//cell wall organization;GO:0009834//plant-type secondary cell wall biogenesis;GO:0010417//glucuronoxylan biosynthetic process	K20869//putative beta-1,4-xylosyltransferase IRX9 [EC:2.4.2.-]	XP_007162726.1//hypothetical protein PHAVU_001G175200g [Phaseolus vulgaris]
Maker00000253	-8.85015	Down	NA	NA	NA	NA	GO:0005576//extracellular region	GO:0046872//metal ion binding;GO:0020037//heme binding;GO:0004601//peroxidase activity	GO:0006979//response to oxidative stress;GO:0042744//hydrogen peroxide catabolic process	K00430//peroxidase [EC:1.11.1.7]	XP_014624819.1//PREDICTED: cationic peroxidase 1-like [Glycine max]
Maker00020378	-1.68319	Down	NA	NA	NA	NA	GO:0016021//integral component of membrane	GO:0015079//potassium ion transmembrane transporter activity	NA	K03549//KUP system potassium uptake protein	XP_020218079.1//potassium transporter 6-like [Cajanus cajan]
Maker00009254	1.88763	Up	NA	NA	NA	NA	GO:0016021//integral component of membrane	NA	NA	NA	XP_020228813.1//uncharacterized protein LOC109809825 [Cajanus cajan]
Maker00020537	2.20571	Up	NA	NA	NA	NA	NA	GO:0016747//transferase activity, transferring acyl groups other than amino-acyl groups	NA	K22889	XP_004511082.1//PREDICTED: uncharacterized acetyltransferase At3g50280-like [Cicer arietinum]
Maker00008146	-1.24796	Down	NA	NA	NA	NA	GO:0016021//integral component of membrane	GO:0004674//protein serine/threonine kinase activity;GO:0005524//ATP binding;GO:0004672//protein kinase activity	NA	K04733//interleukin-1 receptor-associated kinase 4 [EC:2.7.11.1]	XP_016180270.1//receptor-like protein kinase FERONIA [Arachis ipaensis]
Maker00020709	1.25742	Up	NA	NA	NA	NA	GO:0005634//nucleus	GO:0003677//DNA binding	GO:0006355//regulation of transcription, DNA-templated;GO:0006351//transcription, DNA-templated	NA	XP_007157639.1//hypothetical protein PHAVU_002G086600g [Phaseolus vulgaris]
Maker00011842	2.88162	Up	-2.33162	Down	NA	NA	NA	NA	NA	K13679//granule-bound starch synthase [EC:2.4.1.242]	OIV89886.1//hypothetical protein TanjilG_14408 [Lupinus angustifolius];XP_015866198.1//PREDICTED: granule-bound starch synthase 1, chloroplastic/amyloplastic-like [Ziziphus jujuba]
Maker00018565	1.16476	Up	NA	NA	1.13011	Up	GO:0005634//nucleus	GO:0043565//sequence-specific DNA binding;GO:0003700//DNA binding transcription factor activity	NA	K09419//heat shock transcription factor, other eukaryote	KHN02551.1//Heat stress transcription factor A-6b [Glycine soja];KRG95588.1//hypothetical protein GLYMA_19G159500 [Glycine max]
Maker00023053	1.34238	Up	-3.70735	Down	-2.25721	Down	GO:0016021//integral component of membrane	NA	NA	NA	XP_007158201.1//hypothetical protein PHAVU_002G132600g [Phaseolus vulgaris]
Maker00008562	3.03119	Up	-3.77318	Down	NA	NA	NA	GO:0016157//sucrose synthase activity	GO:0009877//nodulation;GO:0005985//sucrose metabolic process	K00695//sucrose synthase [EC:2.4.1.13]	XP_015972770.1//sucrose synthase [Arachis duranensis]
BGI_novel_G001145	1.59669	Up	NA	NA	3.04534	Up	NA	GO:0016758//transferase activity, transferring hexosyl groups	GO:0008152//metabolic process	K18823//soyasaponin III rhamnosyltransferase [EC:2.4.1.273]	BAO45905.1//UDP-glycosyltransferase [Acacia mangium]
Maker00010156	1.43978	Up	-3.48829	Down	NA	NA	NA	NA	NA	K03860//phosphatidylinositol glycan, class Q;K20887//xyloglucan glycosyltransferase 4 [EC:2.4.1.-]	XP_010108998.1//hypothetical protein L484_027195 [Morus notabilis];XP_008460555.1//PREDICTED: protein RSI-1-like [Cucumis melo]
Maker00000410	1.12553	Up	NA	NA	NA	NA	NA	GO:0043565//sequence-specific DNA binding;GO:0003700//DNA binding transcription factor activity	GO:0006351//transcription, DNA-templated	K03686//molecular chaperone DnaJ;K14431//transcription factor TGA	XP_020234898.1//transcription factor TGA7-like [Cajanus cajan];XP_019417201.1//PREDICTED: uncharacterized protein LOC109328266 [Lupinus angustifolius]
Maker00001708	1.19352	Up	NA	NA	NA	NA	GO:0016021//integral component of membrane;GO:0005886//plasma membrane	GO:0005524//ATP binding;GO:0042626//ATPase activity, coupled to transmembrane movement of substances;GO:0016887//ATPase activity	NA	K05681//ATP-binding cassette, subfamily G (WHITE), member 2;K21396//ATP-binding cassette, subfamily G (WHITE), eye pigment precursor transporter	XP_004505642.1//PREDICTED: ABC transporter G family member 15-like [Cicer arietinum]
Maker00015077	-1.09131	Down	NA	NA	-1.0054	Down	NA	GO:0030170//pyridoxal phosphate binding	GO:0006520//cellular amino acid metabolic process	K01733//threonine synthase [EC:4.2.3.1]	XP_015935462.1//threonine synthase, chloroplastic [Arachis duranensis]
Maker00012477	3.25242	Up	-4.92304	Down	NA	NA	NA	NA	NA	K19519//transforming growth factor-beta-induced protein	XP_020215250.1//fasciclin-like arabinogalactan protein 12 [Cajanus cajan]
Maker00000588	2.61398	Up	-6.25883	Down	-3.52603	Down	GO:0016021//integral component of membrane;GO:0005886//plasma membrane	GO:0022857//transmembrane transporter activity	GO:0006810//transport	K17500//integrin-linked kinase-associated serine/threonine phosphatase 2C [EC:3.1.3.16];K07874//Ras-related protein Rab-1A	KHN22214.1//Auxin-induced protein 5NG4 [Glycine soja];XP_015876000.1//PREDICTED: protein WALLS ARE THIN 1-like [Ziziphus jujuba]
Maker00018286	1.93826	Up	NA	NA	1.24852	Up	NA	GO:0003713//transcription coactivator activity	NA	NA	XP_020205443.1//GRF1-interacting factor 1-like isoform X1 [Cajanus cajan]
Maker00019121	1.48518	Up	-2.65488	Down	NA	NA	GO:0005622//intracellular;GO:0016021//integral component of membrane	GO:0005215//transporter activity	NA	K19996//phosphatidylinositol transfer protein SFH5	XP_017422620.1//PREDICTED: patellin-3-like [Vigna angularis]
Maker00000112	1.65361	Up	-2.72221	Down	NA	NA	GO:0016021//integral component of membrane	GO:0005524//ATP binding;GO:0004672//protein kinase activity	NA	K00924//kinase [EC:2.7.1.-]	XP_008219158.1//PREDICTED: receptor-like protein kinase HSL1 [Prunus mume];XP_017422320.1//PREDICTED: receptor-like protein kinase HSL1 [Vigna angularis]
Maker00009527	1.40548	Up	NA	NA	NA	NA	GO:0016021//integral component of membrane;GO:0005886//plasma membrane	GO:0022857//transmembrane transporter activity	GO:0006810//transport	K17500//integrin-linked kinase-associated serine/threonine phosphatase 2C [EC:3.1.3.16];K07874//Ras-related protein Rab-1A	KHN45892.1//Auxin-induced protein 5NG4 [Glycine soja];KHN22214.1//Auxin-induced protein 5NG4 [Glycine soja]
BGI_novel_G002861	1.18488	Up	-1.52641	Down	NA	NA	NA	NA	NA	K13963//serpin B	XP_015880678.1//PREDICTED: serpin-ZX-like [Ziziphus jujuba]
Maker00015197	1.16911	Up	-2.34304	Down	NA	NA	NA	GO:0051287//NAD binding;GO:0004617//phosphoglycerate dehydrogenase activity	GO:0006564//L-serine biosynthetic process	K00058//D-3-phosphoglycerate dehydrogenase / 2-oxoglutarate reductase [EC:1.1.1.95 1.1.1.399]	XP_014489870.1//PREDICTED: D-3-phosphoglycerate dehydrogenase 2, chloroplastic-like [Vigna radiata var. radiata]
Maker00012020	2.08261	Up	-3.78697	Down	-1.5159	Down	GO:0048046//apoplast;GO:0005618//cell wall;GO:0016021//integral component of membrane	GO:0016762//xyloglucan:xyloglucosyl transferase activity;GO:0004553//hydrolase activity, hydrolyzing O-glycosyl compounds	GO:0010411//xyloglucan metabolic process;GO:0042546//cell wall biogenesis;GO:0071555//cell wall organization	K08235//xyloglucan:xyloglucosyl transferase [EC:2.4.1.207]	KHN36328.1//Putative xyloglucan endotransglucosylase/hydrolase protein 6 [Glycine soja]
BGI_novel_G001833	-2.24467	Down	2.97765	Up	NA	NA	GO:0016021//integral component of membrane	NA	NA	K13466//EIX receptor 1/2	GAU25972.1//hypothetical protein TSUD_166540 [Trifolium subterraneum]
BGI_novel_G002626	1.44035	Up	NA	NA	NA	NA	NA	NA	GO:0006952//defense response;GO:0009607//response to biotic stimulus	K10745//ribonuclease H2 subunit C	ACU19047.1//unknown [Glycine max]
Maker00023255	4.90735	Up	-8.88648	Down	-3.3947	Down	GO:0048046//apoplast;GO:0016021//integral component of membrane	GO:0016722//oxidoreductase activity, oxidizing metal ions;GO:0052716//hydroquinone:oxygen oxidoreductase activity;GO:0005507//copper ion binding	GO:0046274//lignin catabolic process	K05909//laccase [EC:1.10.3.2]	XP_020206920.1//laccase-2-like [Cajanus cajan];XP_017417391.1//PREDICTED: laccase-17-like [Vigna angularis];GAU38799.1//hypothetical protein TSUD_163740 [Trifolium subterraneum]
Maker00020985	1.52902	Up	NA	NA	1.29362	Up	NA	NA	NA	K14772//U3 small nucleolar RNA-associated protein 20	XP_013463836.1//calcineurin-like metallo-phosphoesterase superfamily protein [Medicago truncatula]
Maker00017831	2.0646	Up	-3.67317	Down	NA	NA	NA	NA	NA	K03350//anaphase-promoting complex subunit 3	XP_017439117.1//PREDICTED: uncharacterized protein LOC108345064 [Vigna angularis]
Maker00018943	-1.88156	Down	NA	NA	-2.80088	Down	NA	GO:0004842//ubiquitin-protein transferase activity	NA	K08332//vacuolar protein 8	XP_004508855.1//PREDICTED: U-box domain-containing protein 19-like [Cicer arietinum]
Maker00020724	1.09137	Up	-2.85994	Down	-1.67865	Down	GO:0009506//plasmodesma;GO:0016021//integral component of membrane;GO:0005886//plasma membrane	NA	GO:0009554//megasporogenesis;GO:0009934//regulation of meristem structural organization;GO:0010305//leaf vascular tissue pattern formation;GO:0009956//radial pattern formation;GO:0010015//root morphogenesis;GO:0009933//meristem structural organization	K01184//polygalacturonase [EC:3.2.1.15];K00128//aldehyde dehydrogenase (NAD+) [EC:1.2.1.3];K17345//tetraspanin-5;K17356//tetraspanin-13/31	XP_020217959.1//protein TORNADO 2 [Cajanus cajan]
BGI_novel_G002364	-1.20926	Down	NA	NA	-1.29644	Down	GO:0016021//integral component of membrane	GO:0005524//ATP binding;GO:0042626//ATPase activity, coupled to transmembrane movement of substances	NA	K05658//ATP-binding cassette, subfamily B (MDR/TAP), member 1 [EC:3.6.3.44]	XP_003591310.1//ABC transporter B family protein [Medicago truncatula]
Maker00011558	-1.52205	Down	NA	NA	NA	NA	GO:0016021//integral component of membrane	NA	GO:0055085//transmembrane transport	NA	XP_006587264.1//PREDICTED: SPX domain-containing membrane protein At4g22990-like isoform X2 [Glycine max]
Maker00006983	-1.96443	Down	NA	NA	-2.14495	Down	NA	NA	NA	K03006//DNA-directed RNA polymerase II subunit RPB1 [EC:2.7.7.6];K22832	XP_007145036.1//hypothetical protein PHAVU_007G204400g [Phaseolus vulgaris]
Maker00005717	1.71011	Up	NA	NA	NA	NA	GO:0016021//integral component of membrane	GO:0005524//ATP binding;GO:0004672//protein kinase activity	NA	K20718//LRR receptor-like serine/threonine-protein kinase ERECTA [EC:2.7.11.1]	XP_007140080.1//hypothetical protein PHAVU_008G082500g [Phaseolus vulgaris]
Maker00006471	1.40969	Up	-2.84815	Down	-1.38586	Down	GO:0016021//integral component of membrane	GO:0005524//ATP binding;GO:0042626//ATPase activity, coupled to transmembrane movement of substances	NA	K05658//ATP-binding cassette, subfamily B (MDR/TAP), member 1 [EC:3.6.3.44]	XP_021892726.1//ABC transporter B family member 1-like [Carica papaya];XP_017410024.1//PREDICTED: ABC transporter B family member 1 [Vigna angularis]
Maker00021275	1.85715	Up	NA	NA	1.45937	Up	GO:0016021//integral component of membrane	GO:0004674//protein serine/threonine kinase activity;GO:0005524//ATP binding	NA	K04733//interleukin-1 receptor-associated kinase 4 [EC:2.7.11.1];K13418//somatic embryogenesis receptor kinase 1 [EC:2.7.10.1 2.7.11.1];K13416//brassinosteroid insensitive 1-associated receptor kinase 1 [EC:2.7.10.1 2.7.11.1]	XP_016200532.1//probable LRR receptor-like serine/threonine-protein kinase At2g23950 [Arachis ipaensis];XP_012459782.1//PREDICTED: probable LRR receptor-like serine/threonine-protein kinase At2g23950 [Gossypium raimondii];XP_015933214.1//probable LRR receptor-like serine/threonine-protein kinase At2g23950 isoform X1 [Arachis duranensis];CDY39211.1//BnaA03g50230D [Brassica napus]
BGI_novel_G001202	-1.13006	Down	1.82934	Up	NA	NA	NA	GO:0008270//zinc ion binding	NA	K10144//RING finger and CHY zinc finger domain-containing protein 1 [EC:2.3.2.27]	XP_020228094.1//E3 ubiquitin-protein ligase MIEL1 [Cajanus cajan]
Maker00011734	1.0172	Up	-1.16547	Down	NA	NA	NA	NA	NA	K02433//aspartyl-tRNA(Asn)/glutamyl-tRNA(Gln) amidotransferase subunit A [EC:6.3.5.6 6.3.5.7]	XP_020188377.1//phosphatidylinositol/phosphatidylcholine transfer protein SFH11-like isoform X1 [Aegilops tauschii subsp. tauschii];XP_019424554.1//PREDICTED: phosphatidylinositol/phosphatidylcholine transfer protein SFH11 isoform X3 [Lupinus angustifolius];XP_019709245.1//PREDICTED: phosphatidylinositol/phosphatidylcholine transfer protein SFH11 isoform X2 [Elaeis guineensis]
Maker00015365	1.08862	Up	NA	NA	NA	NA	GO:0016021//integral component of membrane	NA	NA	K17345//tetraspanin-5;K17356//tetraspanin-13/31	XP_016200657.1//tetraspanin-8 [Arachis ipaensis]
Maker00010606	1.16244	Up	NA	NA	NA	NA	NA	NA	GO:0010223//secondary shoot formation;GO:1901601//strigolactone biosynthetic process	NA	XP_006601267.1//PREDICTED: probable strigolactone esterase DAD2 isoform X2 [Glycine max]
Maker00020811	1.58299	Up	-3.51724	Down	-1.73928	Down	NA	NA	NA	K18753//butyrate response factor	XP_015942154.1//zinc finger CCCH domain-containing protein 15 [Arachis duranensis]
Maker00022663	1.25454	Up	-2.04914	Down	NA	NA	NA	GO:0016301//kinase activity	NA	K13420//LRR receptor-like serine/threonine-protein kinase FLS2 [EC:2.7.11.1]	XP_006585994.1//PREDICTED: probable LRR receptor-like serine/threonine-protein kinase At1g34110 [Glycine max]
Maker00009904	1.42588	Up	NA	NA	2.14403	Up	GO:0016021//integral component of membrane	GO:0015171//amino acid transmembrane transporter activity	GO:0003333//amino acid transmembrane transport	K14993//solute carrier family 38 (sodium-coupled neutral amino acid transporter), member 6	XP_019433873.1//PREDICTED: probable sodium-coupled neutral amino acid transporter 6 [Lupinus angustifolius]
Maker00021581	-2.92501	Down	NA	NA	-1.53432	Down	NA	GO:0003979//UDP-glucose 6-dehydrogenase activity;GO:0051287//NAD binding	NA	K00012//UDPglucose 6-dehydrogenase [EC:1.1.1.22]	XP_010112421.1//UDP-glucose 6-dehydrogenase [Morus notabilis];XP_021634636.1//UDP-glucose 6-dehydrogenase 1 [Manihot esculenta]
Maker00022137	2.79306	Up	-5.82151	Down	-3.04349	Down	NA	GO:0005199//structural constituent of cell wall	GO:0009664//plant-type cell wall organization	K10955//mucin-2;K03006//DNA-directed RNA polymerase II subunit RPB1 [EC:2.7.7.6];K05747//Wiskott-Aldrich syndrome protein;K02184//formin 2	XP_007143522.1//hypothetical protein PHAVU_007G078600g [Phaseolus vulgaris];XP_015967320.1//extensin-2 isoform X1 [Arachis duranensis];OIV91433.1//hypothetical protein TanjilG_02051 [Lupinus angustifolius]
Maker00009737	1.71937	Up	NA	NA	NA	NA	GO:0005794//Golgi apparatus;GO:0016021//integral component of membrane	GO:0016413//O-acetyltransferase activity	GO:0071554//cell wall organization or biogenesis;GO:0050826//response to freezing	K11323//histone arginine demethylase JMJD6 [EC:1.14.11.-];K01414//oligopeptidase A [EC:3.4.24.70]	XP_020238741.1//protein ESKIMO 1-like [Cajanus cajan]
Maker00005967	2.27382	Up	-2.89829	Down	NA	NA	GO:0005885//Arp2/3 protein complex;GO:0005737//cytoplasm	GO:0003779//actin binding;GO:0051015//actin filament binding;GO:0005200//structural constituent of cytoskeleton	GO:0034314//Arp2/3 complex-mediated actin nucleation;GO:0030041//actin filament polymerization	K05758//actin related protein 2/3 complex, subunit 2	XP_020226004.1//actin-related protein 2/3 complex subunit 2B [Cajanus cajan];XP_004497823.1//PREDICTED: actin-related protein 2/3 complex subunit 2B isoform X1 [Cicer arietinum]
Maker00021142	1.22644	Up	-3.24175	Down	NA	NA	GO:0005741//mitochondrial outer membrane	NA	GO:0055085//transmembrane transport	K15040//voltage-dependent anion channel protein 2	XP_015942358.1//mitochondrial outer membrane protein porin of 36 kDa isoform X1 [Arachis duranensis]
BGI_novel_G001364	-2.63055	Down	NA	NA	NA	NA	NA	GO:0004555//alpha,alpha-trehalase activity;GO:0005509//calcium ion binding	GO:0005991//trehalose metabolic process	K01194//alpha,alpha-trehalase [EC:3.2.1.28]	XP_007160201.1//hypothetical protein PHAVU_002G301500g [Phaseolus vulgaris]
Maker00007864	1.6089	Up	NA	NA	NA	NA	NA	NA	NA	K14494//DELLA protein	KHN43455.1//DELLA protein GAI1 [Glycine soja]
Maker00009672	1.84	Up	NA	NA	2.64377	Up	NA	NA	NA	K21994//LOB domain-containing protein 18	XP_015945145.1//LOB domain-containing protein 15 [Arachis duranensis]
Maker00018951	1.59076	Up	NA	NA	1.66989	Up	GO:0005739//mitochondrion	NA	GO:0031426//polycistronic mRNA processing	NA	XP_019432078.1//PREDICTED: uncharacterized protein LOC109339137 [Lupinus angustifolius]
Maker00022322	1.65533	Up	NA	NA	NA	NA	GO:0016021//integral component of membrane	GO:0016301//kinase activity	NA	K15503//serine/threonine-protein phosphatase 6 regulatory ankyrin repeat subunit B;K15502//serine/threonine-protein phosphatase 6 regulatory ankyrin repeat subunit A	XP_014517450.1//PREDICTED: uncharacterized protein LOC106774938 [Vigna radiata var. radiata];XP_020202013.1//uncharacterized protein LOC109787847 [Cajanus cajan]
Maker00019593	1.2604	Up	NA	NA	NA	NA	NA	GO:0008233//peptidase activity	NA	K22684	XP_020222169.1//metacaspase-1-like [Cajanus cajan];XP_006585445.1//PREDICTED: metacaspase-3-like [Glycine max]
Maker00010059	1.42988	Up	NA	NA	1.84123	Up	GO:0016021//integral component of membrane	GO:0005215//transporter activity	NA	K09873//aquaporin TIP	XP_003522708.1//PREDICTED: aquaporin TIP4-1 [Glycine max]
Maker00018741	-1.78382	Down	3.63762	Up	1.86068	Up	GO:0016021//integral component of membrane	GO:0016705//oxidoreductase activity, acting on paired donors, with incorporation or reduction of molecular oxygen;GO:0020037//heme binding;GO:0005506//iron ion binding;GO:0004497//monooxygenase activity	NA	K20617//cytochrome P450 family 71 subfamily A;K07418//cytochrome P450 family 2 subfamily J [EC:1.14.14.1];K00512//steroid 17alpha-monooxygenase / 17alpha-hydroxyprogesterone deacetylase [EC:1.14.14.19 1.14.14.32];K07408//cytochrome P450 family 1 subfamily A polypeptide 1 [EC:1.14.14.1]	XP_020211125.1//cytochrome P450 71A1-like [Cajanus cajan];XP_020213693.1//cytochrome P450 71A1-like [Cajanus cajan]
Maker00022570	1.32795	Up	NA	NA	1.02224	Up	NA	GO:0004252//serine-type endopeptidase activity	NA	K12619//5'-3' exoribonuclease 2 [EC:3.1.13.-];K13199//plasminogen activator inhibitor 1 RNA-binding protein;K15333//tRNA guanosine-2'-O-methyltransferase [EC:2.1.1.34];K14568//rRNA small subunit pseudouridine methyltransferase Nep1 [EC:2.1.1.260]	GAU48418.1//hypothetical protein TSUD_186980 [Trifolium subterraneum];KHN38839.1//Subtilisin-like protease [Glycine soja]
Maker00022531	1.79146	Up	-2.68837	Down	NA	NA	GO:0016021//integral component of membrane	GO:0016705//oxidoreductase activity, acting on paired donors, with incorporation or reduction of molecular oxygen;GO:0020037//heme binding;GO:0005506//iron ion binding;GO:0004497//monooxygenase activity	NA	K15402//fatty acid omega-hydroxylase [EC:1.14.-.-]	XP_003538960.2//PREDICTED: cytochrome P450 86B1-like [Glycine max]
Maker00013561	2.74309	Up	-6.15385	Down	-2.91724	Down	GO:0005634//nucleus	GO:0003677//DNA binding	NA	K22390;K15397//3-ketoacyl-CoA synthase [EC:2.3.1.199];K09522//DnaJ homolog subfamily C member 2	XP_003537885.2//PREDICTED: protein RADIALIS-like 4 [Glycine max]
Maker00017913	1.34032	Up	-2.64124	Down	-1.2929	Down	GO:0005874//microtubule;GO:0005737//cytoplasm	GO:0005200//structural constituent of cytoskeleton;GO:0005525//GTP binding;GO:0003924//GTPase activity	GO:0007017//microtubule-based process	K07375//tubulin beta	PAN27942.1//hypothetical protein PAHAL_E01239 [Panicum hallii];EOY32988.1//Beta-6 tubulin isoform 1 [Theobroma cacao]
Maker00007463	3.15194	Up	-6.44305	Down	NA	NA	NA	NA	NA	K03860//phosphatidylinositol glycan, class Q;K02184//formin 2;K20887//xyloglucan glycosyltransferase 4 [EC:2.4.1.-]	XP_019442593.1//PREDICTED: gibberellin-regulated protein 14-like [Lupinus angustifolius]
Maker00020969	1.60494	Up	NA	NA	NA	NA	GO:0005634//nucleus	GO:0003680//AT DNA binding;GO:0003700//DNA binding transcription factor activity	NA	K23047	XP_019450684.1//PREDICTED: AT-hook motif nuclear-localized protein 20-like [Lupinus angustifolius]
Maker00007628	1.69445	Up	NA	NA	NA	NA	NA	NA	NA	K20285//Rab9 effector protein with kelch motifs	XP_006604789.1//PREDICTED: acyl-CoA-binding domain-containing protein 4-like isoform X2 [Glycine max]
BGI_novel_G001210	-1.06132	Down	-1.25209	Down	-2.34293	Down	GO:0016021//integral component of membrane;GO:0005886//plasma membrane	GO:0005524//ATP binding;GO:0042626//ATPase activity, coupled to transmembrane movement of substances;GO:0016887//ATPase activity	GO:0006810//transport	K05681//ATP-binding cassette, subfamily G (WHITE), member 2	XP_003545503.1//PREDICTED: pleiotropic drug resistance protein 1-like isoform X3 [Glycine max]
Maker00023982	2.16228	Up	NA	NA	NA	NA	NA	NA	NA	K03006//DNA-directed RNA polymerase II subunit RPB1 [EC:2.7.7.6]	XP_007159530.1//hypothetical protein PHAVU_002G245200g [Phaseolus vulgaris]
Maker00019918	1.09994	Up	NA	NA	1.31862	Up	GO:0016021//integral component of membrane;GO:0009654//photosystem II oxygen evolving complex	NA	GO:0015979//photosynthesis	K03541//photosystem II 10kDa protein	XP_015932271.1//photosystem II 10 kDa polypeptide, chloroplastic [Arachis duranensis]
Maker00019795	-3.01892	Down	NA	NA	-5.42537	Down	NA	NA	NA	K12403//AP-4 complex subunit sigma-1	XP_004488588.1//PREDICTED: uncharacterized protein LOC101495276 [Cicer arietinum]
Maker00018158	1.22274	Up	-5.12945	Down	-3.61678	Down	NA	NA	NA	K09422//transcription factor MYB, plant	KHN14179.1//Transcription factor MYB86 [Glycine soja]
Maker00018772	1.8501	Up	-2.66593	Down	NA	NA	NA	GO:0004190//aspartic-type endopeptidase activity	GO:0006508//proteolysis;GO:0030163//protein catabolic process	K01381//saccharopepsin [EC:3.4.23.25]	XP_003523200.1//PREDICTED: aspartic proteinase nepenthesin-1-like [Glycine max]
Maker00023698	1.39645	Up	NA	NA	NA	NA	GO:0005634//nucleus;GO:0005737//cytoplasm	NA	NA	K04733//interleukin-1 receptor-associated kinase 4 [EC:2.7.11.1];K00276//primary-amine oxidase [EC:1.4.3.21]	XP_019435475.1//PREDICTED: uncharacterized protein LOC109341962 [Lupinus angustifolius]
Maker00005737	1.37213	Up	-3.19565	Down	NA	NA	GO:0016021//integral component of membrane	GO:0004970//ionotropic glutamate receptor activity	NA	K05387//glutamate receptor, ionotropic, plant	XP_018838797.1//PREDICTED: glutamate receptor 2.1-like [Juglans regia]
Maker00013662	1.29883	Up	-3.97377	Down	-2.56964	Down	GO:0016021//integral component of membrane	NA	NA	K01180//endo-1,3(4)-beta-glucanase [EC:3.2.1.6];K21952//CASK-interacting protein	XP_007157221.1//hypothetical protein PHAVU_002G052800g [Phaseolus vulgaris];XP_003517601.1//PREDICTED: classical arabinogalactan protein 9-like [Glycine max]
Maker00011759	2.32264	Up	-3.05004	Down	NA	NA	NA	NA	NA	K11855//ubiquitin carboxyl-terminal hydrolase 36/42 [EC:3.4.19.12]	XP_009333675.1//PREDICTED: 14 kDa proline-rich protein DC2.15-like isoform X1 [Pyrus x bretschneideri]
Maker00012099	1.79062	Up	-2.93045	Down	NA	NA	NA	GO:0004553//hydrolase activity, hydrolyzing O-glycosyl compounds	GO:0005975//carbohydrate metabolic process	K19891//glucan endo-1,3-beta-glucosidase 1/2/3 [EC:3.2.1.39]	XP_019421021.1//PREDICTED: glucan endo-1,3-beta-glucosidase 1 [Lupinus angustifolius]
BGI_novel_G001178	1.67695	Up	-2.90553	Down	NA	NA	NA	GO:0003824//catalytic activity;GO:0050662//coenzyme binding	NA	K13082//bifunctional dihydroflavonol 4-reductase/flavanone 4-reductase [EC:1.1.1.219 1.1.1.234]	AOX49226.1//dihydroflavonol-4-reductase [Acacia koa]
Maker00021910	1.67164	Up	-3.07182	Down	NA	NA	GO:0005871//kinesin complex	GO:0005524//ATP binding;GO:0003777//microtubule motor activity;GO:0008017//microtubule binding;GO:0016887//ATPase activity	GO:0007018//microtubule-based movement	K10406//kinesin family member C2/C3	XP_003530813.1//PREDICTED: kinesin KP1-like [Glycine max];KHN31694.1//Kinesin-4 [Glycine soja]
Maker00000415	2.7199	Up	-5.55906	Down	NA	NA	GO:0016021//integral component of membrane	NA	NA	K19476//vacuolar protein sorting-associated protein IST1;K14209//solute carrier family 36 (proton-coupled amino acid transporter);K15015//solute carrier family 32 (vesicular inhibitory amino acid transporter)	XP_021284385.1//lysine histidine transporter-like 8 [Herrania umbratica]
Maker00014537	2.53364	Up	-5.32135	Down	-2.76378	Down	NA	GO:0004190//aspartic-type endopeptidase activity	NA	K01379//cathepsin D [EC:3.4.23.5];K02882//large subunit ribosomal protein L18Ae;K01381//saccharopepsin [EC:3.4.23.25];K06002//pepsin A [EC:3.4.23.1]	XP_020203915.1//aspartyl protease AED3-like [Cajanus cajan]
Maker00002125	2.75826	Up	-1.74717	Down	NA	NA	NA	GO:0004553//hydrolase activity, hydrolyzing O-glycosyl compounds;GO:0016985//mannan endo-1,4-beta-mannosidase activity	GO:0046355//mannan catabolic process;GO:0005975//carbohydrate metabolic process	K19355//mannan endo-1,4-beta-mannosidase [EC:3.2.1.78]	XP_004492573.1//PREDICTED: mannan endo-1,4-beta-mannosidase 6 [Cicer arietinum];XP_014496593.1//PREDICTED: mannan endo-1,4-beta-mannosidase 6-like [Vigna radiata var. radiata];XP_003552321.1//PREDICTED: mannan endo-1,4-beta-mannosidase 6-like [Glycine max]
Maker00022856	1.29209	Up	-2.63027	Down	-1.26754	Down	GO:0005576//extracellular region	GO:0046872//metal ion binding;GO:0020037//heme binding;GO:0004601//peroxidase activity	GO:0006979//response to oxidative stress;GO:0042744//hydrogen peroxide catabolic process	K00430//peroxidase [EC:1.11.1.7]	XP_012572636.1//PREDICTED: peroxidase 17-like [Cicer arietinum]
BGI_novel_G000599	1.13249	Up	-3.48558	Down	-2.22919	Down	NA	NA	NA	K03549//KUP system potassium uptake protein;K01599//uroporphyrinogen decarboxylase [EC:4.1.1.37]	XP_004514648.1//PREDICTED: peptide-N4-(N-acetyl-beta-glucosaminyl)asparagine amidase A [Cicer arietinum]
Maker00007255	-1.00243	Down	2.74599	Up	1.75413	Up	GO:0005634//nucleus	GO:0003677//DNA binding	GO:0006355//regulation of transcription, DNA-templated;GO:0006351//transcription, DNA-templated	K13126//polyadenylate-binding protein;K05941//glutathione gamma-glutamylcysteinyltransferase [EC:2.3.2.15]	XP_020219285.1//NAC transcription factor 47 [Cajanus cajan]
Maker00021179	1.49228	Up	-1.86245	Down	NA	NA	NA	GO:0005524//ATP binding;GO:0016301//kinase activity	NA	NA	XP_020222967.1//uncharacterized protein LOC109805338 [Cajanus cajan]
Maker00020293	-2.23169	Down	NA	NA	-3.45367	Down	GO:0005774//vacuolar membrane;GO:0016021//integral component of membrane	GO:0005384//manganese ion transmembrane transporter activity;GO:0005381//iron ion transmembrane transporter activity	GO:0071421//manganese ion transmembrane transport;GO:0030026//cellular manganese ion homeostasis;GO:0006880//intracellular sequestering of iron ion;GO:0071281//cellular response to iron ion	K22736	XP_002314775.1//integral membrane family protein [Populus trichocarpa];XP_018806324.1//PREDICTED: vacuolar iron transporter 1-like [Juglans regia]
Maker00016039	-1.53714	Down	NA	NA	-1.73024	Down	NA	GO:0008661//1-deoxy-D-xylulose-5-phosphate synthase activity	GO:0016114//terpenoid biosynthetic process	K01662//1-deoxy-D-xylulose-5-phosphate synthase [EC:2.2.1.7]	XP_010105036.1//putative 1-deoxy-D-xylulose-5-phosphate synthase [Morus notabilis];XP_018826015.1//PREDICTED: probable 1-deoxy-D-xylulose-5-phosphate synthase, chloroplastic isoform X2 [Juglans regia]
Maker00014682	1.0958	Up	-1.41397	Down	NA	NA	GO:0016021//integral component of membrane	NA	NA	K15382//solute carrier family 50 (sugar transporter);K04077//chaperonin GroEL	GAU22022.1//hypothetical protein TSUD_111620 [Trifolium subterraneum]
Maker00000042	1.41126	Up	-2.38785	Down	NA	NA	GO:0016021//integral component of membrane	NA	NA	K04733//interleukin-1 receptor-associated kinase 4 [EC:2.7.11.1]	XP_014504136.1//PREDICTED: pathogenesis-related protein 5 [Vigna radiata var. radiata]
Maker00010069	1.30646	Up	-1.93126	Down	NA	NA	GO:0005634//nucleus	GO:0003677//DNA binding;GO:0003700//DNA binding transcription factor activity	GO:0006351//transcription, DNA-templated	K09286//EREBP-like factor	XP_020213776.1//protein PPLZ02-like [Cajanus cajan]
BGI_novel_G001343	1.72223	Up	NA	NA	NA	NA	NA	GO:0046983//protein dimerization activity	NA	K16189//phytochrome-interacting factor 4;K12126//phytochrome-interacting factor 3	XP_019414021.1//PREDICTED: transcription factor UNE10 isoform X1 [Lupinus angustifolius]
Maker00003572	1.32644	Up	NA	NA	NA	NA	GO:0005634//nucleus	GO:0046872//metal ion binding;GO:0003677//DNA binding	NA	K20641//Rho GTPase-activating protein 20;K13415//protein brassinosteroid insensitive 1 [EC:2.7.10.1 2.7.11.1]	XP_015868798.1//PREDICTED: squamosa promoter-binding protein 1-like [Ziziphus jujuba]
Maker00009069	2.01946	Up	-4.5369	Down	-2.44142	Down	NA	NA	NA	NA	XP_020213593.1//uncharacterized protein LOC109797853 [Cajanus cajan]
Maker00021630	1.46944	Up	NA	NA	NA	NA	NA	GO:0047429//nucleoside-triphosphate diphosphatase activity	GO:0009143//nucleoside triphosphate catabolic process	K16904//dCTP diphosphatase [EC:3.6.1.12]	KRH54611.1//hypothetical protein GLYMA_06G197800 [Glycine max]
Maker00006824	2.01702	Up	-2.35364	Down	NA	NA	GO:0016021//integral component of membrane	GO:0046872//metal ion binding;GO:0030570//pectate lyase activity	GO:0045490//pectin catabolic process	K01728//pectate lyase [EC:4.2.2.2]	OIV92169.1//hypothetical protein TanjilG_30810 [Lupinus angustifolius]
Maker00018869	1.0661	Up	-1.39985	Down	NA	NA	NA	GO:0004190//aspartic-type endopeptidase activity	GO:0006508//proteolysis;GO:0030163//protein catabolic process	K00924//kinase [EC:2.7.1.-]	XP_020203965.1//aspartic proteinase Asp1-like [Cajanus cajan]
Maker00010236	2.22431	Up	-3.54564	Down	NA	NA	GO:0005737//cytoplasm	GO:0046872//metal ion binding;GO:0003872//6-phosphofructokinase activity;GO:0005524//ATP binding	GO:0006002//fructose 6-phosphate metabolic process	K00850//6-phosphofructokinase 1 [EC:2.7.1.11]	XP_003522720.1//PREDICTED: ATP-dependent 6-phosphofructokinase 6-like [Glycine max]
Maker00008373	1.59542	Up	-2.03639	Down	NA	NA	GO:0016021//integral component of membrane	NA	NA	K05747//Wiskott-Aldrich syndrome protein;K15174//RNA polymerase II-associated factor 1	OTF87188.1//putative HSP20-like chaperone [Helianthus annuus]
Maker00012755	-2.58429	Down	4.53978	Up	1.54951	Up	GO:0005886//plasma membrane	GO:0005524//ATP binding;GO:0004675//transmembrane receptor protein serine/threonine kinase activity	GO:0006468//protein phosphorylation;GO:0007166//cell surface receptor signaling pathway	K04733//interleukin-1 receptor-associated kinase 4 [EC:2.7.11.1];K18873//pathogen-induced protein kinase	XP_021889812.1//probable serine/threonine-protein kinase PBL5 [Carica papaya];XP_021609181.1//probable serine/threonine-protein kinase PBL5 [Manihot esculenta]
Maker00013143	-2.28917	Down	4.24651	Up	1.79908	Up	NA	NA	NA	K04733//interleukin-1 receptor-associated kinase 4 [EC:2.7.11.1]	XP_013465332.1//Ripening related protein family [Medicago truncatula]
Maker00023756	2.90585	Up	-2.98281	Down	NA	NA	NA	NA	NA	NA	XP_003547182.1//PREDICTED: fasciclin-like arabinogalactan protein 11 [Glycine max]
Maker00009944	4.75951	Up	-4.49667	Down	NA	NA	GO:0016021//integral component of membrane	NA	NA	K20858//calcium uniporter protein, mitochondrial	XP_004499124.1//PREDICTED: calcium uniporter protein 4, mitochondrial [Cicer arietinum]
Maker00009506	1.06357	Up	NA	NA	NA	NA	NA	GO:0046872//metal ion binding	NA	NA	XP_019427340.1//PREDICTED: protein yippee-like At4g27740 [Lupinus angustifolius]
BGI_novel_G003128	-1.06115	Down	NA	NA	-1.58593	Down	NA	GO:0008061//chitin binding;GO:0004568//chitinase activity	GO:0006032//chitin catabolic process;GO:0016998//cell wall macromolecule catabolic process;GO:0005975//carbohydrate metabolic process	K20547//basic endochitinase B [EC:3.2.1.14]	XP_020237672.1//endochitinase CH5B [Cajanus cajan]
Maker00019952	1.3255	Up	-1.51505	Down	NA	NA	GO:0016602//CCAAT-binding factor complex	GO:0003677//DNA binding;GO:0003700//DNA binding transcription factor activity	NA	K08064//nuclear transcription factor Y, alpha	XP_019449593.1//PREDICTED: nuclear transcription factor Y subunit A-1-like [Lupinus angustifolius]
BGI_novel_G002038	2.18471	Up	-3.30151	Down	NA	NA	NA	GO:0016747//transferase activity, transferring acyl groups other than amino-acyl groups	GO:0009058//biosynthetic process	K00660//chalcone synthase [EC:2.3.1.74]	AOX49211.1//chalcone synthase [Acacia koa]
Maker00016014	1.24676	Up	-1.88128	Down	NA	NA	GO:0005829//cytosol	GO:0004014//adenosylmethionine decarboxylase activity	GO:0006597//spermine biosynthetic process;GO:0006557//S-adenosylmethioninamine biosynthetic process;GO:0008295//spermidine biosynthetic process	K01611//S-adenosylmethionine decarboxylase [EC:4.1.1.50]	XP_016690347.1//PREDICTED: S-adenosylmethionine decarboxylase proenzyme-like [Gossypium hirsutum];XP_021902142.1//S-adenosylmethionine decarboxylase proenzyme-like [Carica papaya]
Maker00009908	1.68992	Up	-2.19216	Down	NA	NA	GO:0005634//nucleus;GO:0005667//transcription factor complex	GO:0001228//transcriptional activator activity, RNA polymerase II transcription regulatory region sequence-specific DNA binding;GO:0000977//RNA polymerase II regulatory region sequence-specific DNA binding;GO:0003682//chromatin binding;GO:0043565//sequence-specific DNA binding;GO:0008270//zinc ion binding;GO:0003700//DNA binding transcription factor activity;GO:0001085//RNA polymerase II transcri…	GO:0030154//cell differentiation;GO:0006351//transcription, DNA-templated;GO:0045893//positive regulation of transcription, DNA-templated	K17895//GATA-binding protein 3;K21630//GATA-type zinc finger protein 1	XP_003550120.1//PREDICTED: GATA transcription factor 12-like [Glycine max]
Maker00022654	1.77306	Up	NA	NA	NA	NA	NA	GO:0008661//1-deoxy-D-xylulose-5-phosphate synthase activity	GO:0016114//terpenoid biosynthetic process	K01662//1-deoxy-D-xylulose-5-phosphate synthase [EC:2.2.1.7]	XP_019421375.1//PREDICTED: probable 1-deoxy-D-xylulose-5-phosphate synthase 2, chloroplastic [Lupinus angustifolius];XP_014505550.1//PREDICTED: probable 1-deoxy-D-xylulose-5-phosphate synthase 2, chloroplastic [Vigna radiata var. radiata];XP_020240258.1//probable 1-deoxy-D-xylulose-5-phosphate synthase 2, chloroplastic [Cajanus cajan]
Maker00021571	-1.17234	Down	NA	NA	-2.53331	Down	GO:0016021//integral component of membrane	NA	NA	NA	XP_014490978.1//PREDICTED: protein RALF-like 32 [Vigna radiata var. radiata]
Maker00011365	1.91551	Up	-2.50289	Down	NA	NA	GO:0005774//vacuolar membrane;GO:0009506//plasmodesma;GO:0016021//integral component of membrane;GO:0005777//peroxisome;GO:0005739//mitochondrion;GO:0009941//chloroplast envelope;GO:0009507//chloroplast	GO:0020037//heme binding;GO:0004601//peroxidase activity;GO:0004130//cytochrome-c peroxidase activity	GO:0006979//response to oxidative stress;GO:0034599//cellular response to oxidative stress;GO:0009735//response to cytokinin;GO:0042744//hydrogen peroxide catabolic process;GO:0000302//response to reactive oxygen species	K00434//L-ascorbate peroxidase [EC:1.11.1.11]	XP_011046698.1//PREDICTED: L-ascorbate peroxidase 3, peroxisomal-like [Populus euphratica];XP_006422615.1//hypothetical protein CICLE_v10028990mg [Citrus clementina]
BGI_novel_G003140	-1.29688	Down	-1.83464	Down	-3.18136	Down	GO:0016021//integral component of membrane	NA	NA	K08150//MFS transporter, SP family, solute carrier family 2 (myo-inositol transporter), member 13	XP_019413726.1//PREDICTED: polyol transporter 5-like [Lupinus angustifolius]
Maker00004099	1.20865	Up	-1.77676	Down	NA	NA	NA	NA	NA	K03006//DNA-directed RNA polymerase II subunit RPB1 [EC:2.7.7.6]	XP_020228148.1//early nodulin-like protein 3 [Cajanus cajan]
Maker00018996	1.87729	Up	NA	NA	2.70083	Up	NA	NA	NA	K03860//phosphatidylinositol glycan, class Q;K20887//xyloglucan glycosyltransferase 4 [EC:2.4.1.-]	XP_003608962.2//gibberellin-regulated family protein [Medicago truncatula]
Maker00018010	1.48066	Up	NA	NA	NA	NA	NA	NA	NA	NA	XP_006604648.1//PREDICTED: uncharacterized protein LOC100783303 [Glycine max]
Maker00024381	1.88869	Up	-3.63831	Down	NA	NA	NA	GO:0008146//sulfotransferase activity	NA	K22312//hydroxyjasmonate sulfotransferase [EC:2.8.2.39]	XP_021629035.1//cytosolic sulfotransferase 15-like [Manihot esculenta]
Maker00007667	1.29072	Up	-3.65136	Down	-2.36283	Down	GO:0016021//integral component of membrane	NA	GO:0055085//transmembrane transport	K13754//solute carrier family 24 (sodium/potassium/calcium exchanger), member 6	XP_020239027.1//cation/calcium exchanger 1-like [Cajanus cajan];XP_007151476.1//hypothetical protein PHAVU_004G049800g [Phaseolus vulgaris]
Maker00010062	1.6007	Up	NA	NA	NA	NA	NA	GO:0008168//methyltransferase activity	NA	K08241//jasmonate O-methyltransferase [EC:2.1.1.141]	XP_018821082.1//PREDICTED: jasmonate O-methyltransferase [Juglans regia];XP_020221422.1//jasmonate O-methyltransferase [Cajanus cajan]
BGI_novel_G002714	1.99611	Up	NA	NA	2.39655	Up	NA	GO:0016747//transferase activity, transferring acyl groups other than amino-acyl groups	NA	K19861//benzyl alcohol O-benzoyltransferase [EC:2.3.1.196 2.3.1.232]	XP_019450077.1//PREDICTED: benzyl alcohol O-benzoyltransferase-like [Lupinus angustifolius]
Maker00000620	1.30886	Up	-2.38251	Down	NA	NA	GO:0005829//cytosol	NA	GO:0009904//chloroplast accumulation movement;GO:0009903//chloroplast avoidance movement	NA	XP_003538502.1//PREDICTED: WEB family protein At2g40480-like isoform X2 [Glycine max]
Maker00006862	2.36631	Up	-3.18195	Down	NA	NA	NA	NA	NA	NA	XP_015971436.1//protein SIEVE ELEMENT OCCLUSION B [Arachis duranensis]
BGI_novel_G001837	2.14603	Up	NA	NA	NA	NA	GO:0016021//integral component of membrane	NA	NA	NA	XP_020224456.1//uncharacterized protein LOC109806455 [Cajanus cajan]
Maker00010175	1.09842	Up	NA	NA	NA	NA	GO:0016021//integral component of membrane	NA	NA	K00472//prolyl 4-hydroxylase [EC:1.14.11.2];K19042//E3 ubiquitin-protein ligase BOI and related proteins [EC:2.3.2.27]	XP_021687504.1//uncharacterized protein LOC110669944 [Hevea brasiliensis]
Maker00009342	1.06543	Up	-2.91645	Down	-1.78821	Down	GO:0005634//nucleus	NA	GO:0006355//regulation of transcription, DNA-templated;GO:0009734//auxin-activated signaling pathway;GO:0006351//transcription, DNA-templated	K14484//auxin-responsive protein IAA	XP_020217840.1//auxin-responsive protein IAA27 [Cajanus cajan]
BGI_novel_G001799	2.52519	Up	-3.97706	Down	NA	NA	NA	NA	NA	K00703//starch synthase [EC:2.4.1.21]	KYP59768.1//hypothetical protein KK1_015209 [Cajanus cajan]
Maker00022294	-1.76202	Down	NA	NA	NA	NA	GO:0016021//integral component of membrane	GO:0009055//electron transfer activity	NA	K03006//DNA-directed RNA polymerase II subunit RPB1 [EC:2.7.7.6]	XP_003521063.1//PREDICTED: uclacyanin-3 [Glycine max]
Maker00012987	2.534	Up	NA	NA	NA	NA	NA	NA	NA	K15400//omega-hydroxypalmitate O-feruloyl transferase [EC:2.3.1.188];K01640//hydroxymethylglutaryl-CoA lyase [EC:4.1.3.4]	GAU27112.1//hypothetical protein TSUD_104210 [Trifolium subterraneum]
Maker00007921	-2.24252	Down	NA	NA	NA	NA	GO:0005634//nucleus	GO:0043565//sequence-specific DNA binding;GO:0003700//DNA binding transcription factor activity	GO:0006351//transcription, DNA-templated	K13425//WRKY transcription factor 22	XP_020220978.1//probable WRKY transcription factor 27 [Cajanus cajan]
BGI_novel_G001385	-5.47386	Down	2.83115	Up	-2.92365	Down	GO:0005576//extracellular region	NA	GO:0019953//sexual reproduction	K20628//expansin	XP_003549947.1//PREDICTED: expansin-like B1 [Glycine max]
BGI_novel_G001377	2.34555	Up	-5.19383	Down	-2.22709	Down	NA	NA	NA	K07375//tubulin beta	XP_020217199.1//tubulin beta-1 chain [Cajanus cajan]
BGI_novel_G001720	-2.94067	Down	NA	NA	NA	NA	NA	NA	NA	NA	NA
Maker00007400	2.64173	Up	-4.90174	Down	-2.10705	Down	NA	NA	NA	K17964//leucine-rich PPR motif-containing protein, mitochondrial	KHN30324.1//COBRA-like protein 4 [Glycine soja]
Maker00009812	1.17335	Up	NA	NA	1.72241	Up	GO:0005623//cell	GO:0015035//protein disulfide oxidoreductase activity;GO:0009055//electron transfer activity;GO:0008237//metallopeptidase activity	GO:0045454//cell redox homeostasis	K03676//glutaredoxin 3	XP_018844670.1//PREDICTED: glutaredoxin-C6 [Juglans regia];XP_016207857.1//glutaredoxin-C6 [Arachis ipaensis]
Maker00007576	1.75821	Up	-6.83139	Down	-4.7092	Down	NA	GO:0016614//oxidoreductase activity, acting on CH-OH group of donors;GO:0050660//flavin adenine dinucleotide binding	NA	K00108//choline dehydrogenase [EC:1.1.99.1];K21270//(R)-mandelonitrile oxidase [EC:1.1.3.49]	KHN15686.1//Protein HOTHEAD, partial [Glycine soja];XP_004496619.1//PREDICTED: protein HOTHEAD-like [Cicer arietinum]
Maker00008990	1.5944	Up	-1.9865	Down	NA	NA	GO:0016021//integral component of membrane	NA	NA	NA	XP_019415298.1//PREDICTED: uncharacterized protein LOC109326874 isoform X1 [Lupinus angustifolius]
Maker00001003	1.85218	Up	-2.07368	Down	NA	NA	NA	NA	NA	K03860//phosphatidylinositol glycan, class Q;K20887//xyloglucan glycosyltransferase 4 [EC:2.4.1.-]	XP_006595495.1//PREDICTED: uncharacterized protein LOC100305819 isoform X1 [Glycine max]
Maker00023225	-1.37855	Down	NA	NA	-1.59183	Down	NA	GO:0016740//transferase activity	NA	K00799//glutathione S-transferase [EC:2.5.1.18]	XP_014506981.1//PREDICTED: probable glutathione S-transferase [Vigna radiata var. radiata]
BGI_novel_G002766	1.16885	Up	NA	NA	NA	NA	NA	NA	NA	K14504//xyloglucan:xyloglucosyl transferase TCH4 [EC:2.4.1.207]	XP_015933730.1//xyloglucan endotransglucosylase/hydrolase protein 22 isoform X2 [Arachis duranensis]
BGI_novel_G003182	-2.62384	Down	NA	NA	-5.42517	Down	NA	GO:0046872//metal ion binding;GO:0051213//dioxygenase activity;GO:0016491//oxidoreductase activity	NA	K04125//gibberellin 2-oxidase [EC:1.14.11.13]	XP_004486022.1//PREDICTED: gibberellin 2-beta-dioxygenase-like [Cicer arietinum]
Maker00005971	-1.40438	Down	1.97981	Up	NA	NA	GO:0005886//plasma membrane	GO:0004674//protein serine/threonine kinase activity;GO:0005524//ATP binding	GO:0006468//protein phosphorylation	K04733//interleukin-1 receptor-associated kinase 4 [EC:2.7.11.1]	GAU37298.1//hypothetical protein TSUD_354540 [Trifolium subterraneum]
Maker00013628	-1.38963	Down	NA	NA	-1.89677	Down	GO:0016021//integral component of membrane	NA	NA	K01534//Cd2+/Zn2+-exporting ATPase [EC:3.6.3.3 3.6.3.5]	XP_004287065.1//PREDICTED: uncharacterized protein LOC101293334 [Fragaria vesca subsp. vesca]
Maker00001096	1.46031	Up	-2.84129	Down	-1.34032	Down	NA	GO:0004252//serine-type endopeptidase activity	NA	K12619//5'-3' exoribonuclease 2 [EC:3.1.13.-];K01188//beta-glucosidase [EC:3.2.1.21];K13199//plasminogen activator inhibitor 1 RNA-binding protein;K15333//tRNA guanosine-2'-O-methyltransferase [EC:2.1.1.34];K13124//mitogen-activated protein kinase organizer 1;K14568//rRNA small subunit pseudouridine methyltransferase Nep1 [EC:2.1.1.260]	XP_016194123.1//subtilisin-like protease Glyma18g48580 [Arachis ipaensis]
Maker00024434	1.26407	Up	-2.27244	Down	NA	NA	GO:0005789//endoplasmic reticulum membrane	GO:0005506//iron ion binding;GO:0016491//oxidoreductase activity	GO:0006629//lipid metabolic process;GO:0008610//lipid biosynthetic process	K15404//aldehyde decarbonylase [EC:4.1.99.5]	XP_019053090.1//PREDICTED: protein ECERIFERUM 1-like isoform X2 [Nelumbo nucifera];XP_020238854.1//protein ECERIFERUM 1-like [Cajanus cajan]
Maker00015569	1.29344	Up	-3.14468	Down	NA	NA	GO:0016020//membrane;GO:0009505//plant-type cell wall;GO:0016021//integral component of membrane	GO:0016798//hydrolase activity, acting on glycosyl bonds	NA	K07964//heparanase [EC:3.2.1.166]	XP_004488517.1//PREDICTED: heparanase-like protein 3 [Cicer arietinum]
BGI_novel_G002191	2.31069	Up	-1.90238	Down	NA	NA	NA	NA	NA	NA	XP_019422834.1//PREDICTED: metacaspase-3-like isoform X1 [Lupinus angustifolius]
BGI_novel_G002275	-1.03035	Down	-1.7064	Down	-2.75154	Down	NA	GO:0016747//transferase activity, transferring acyl groups other than amino-acyl groups	GO:0009058//biosynthetic process	K00660//chalcone synthase [EC:2.3.1.74]	AFA55180.1//chalcone synthase [Acacia confusa]
BGI_novel_G002906	-2.93963	Down	3.25573	Up	NA	NA	GO:0005615//extracellular space;GO:0005576//extracellular region	GO:0004553//hydrolase activity, hydrolyzing O-glycosyl compounds;GO:0008061//chitin binding;GO:0004568//chitinase activity	GO:0006032//chitin catabolic process;GO:0005975//carbohydrate metabolic process;GO:0000272//polysaccharide catabolic process	K01183//chitinase [EC:3.2.1.14]	P29024.1//RecName: Full=Acidic endochitinase; Flags: Precursor
Maker00006529	1.37564	Up	-2.45916	Down	NA	NA	GO:0005783//endoplasmic reticulum;GO:0009506//plasmodesma;GO:0016021//integral component of membrane;GO:0005886//plasma membrane	NA	NA	K20843//hydroxyproline O-galactosyltransferase 2/3/4/5/6 [EC:2.4.1.-];K04733//interleukin-1 receptor-associated kinase 4 [EC:2.7.11.1];K00549//5-methyltetrahydropteroyltriglutamate--homocysteine methyltransferase [EC:2.1.1.14];K14308//nuclear pore complex protein Nup54;K10601//E3 ubiquitin-protein ligase synoviolin [EC:2.3.2.27]	XP_016181298.1//protein QUIRKY [Arachis ipaensis]
BGI_novel_G001641	-4.17011	Down	NA	NA	NA	NA	NA	GO:0009055//electron transfer activity	NA	NA	XP_020218419.1//uncharacterized protein LOC109801681 [Cajanus cajan]
Maker00008034	1.60196	Up	NA	NA	2.70305	Up	NA	GO:0016851//magnesium chelatase activity	GO:0015995//chlorophyll biosynthetic process	K03403//magnesium chelatase subunit H [EC:6.6.1.1]	KHN13947.1//Magnesium-chelatase subunit H [Glycine soja]
Maker00021977	1.50034	Up	-2.01795	Down	NA	NA	NA	GO:0016787//hydrolase activity	GO:0006950//response to stress	NA	XP_020234148.1//universal stress protein PHOS32 [Cajanus cajan]
Maker00015903	2.18971	Up	-4.23995	Down	-2.03815	Down	GO:0005794//Golgi apparatus;GO:0016021//integral component of membrane;GO:0005886//plasma membrane	GO:0016760//cellulose synthase (UDP-forming) activity;GO:0046872//metal ion binding;GO:0016759//cellulose synthase activity	GO:0009833//plant-type primary cell wall biogenesis;GO:0030244//cellulose biosynthetic process;GO:0071555//cell wall organization	K10999//cellulose synthase A [EC:2.4.1.12]	XP_020208379.1//cellulose synthase A catalytic subunit 7 [UDP-forming] [Cajanus cajan];XP_017406490.1//PREDICTED: cellulose synthase A catalytic subunit 7 [UDP-forming]-like [Vigna angularis]
Maker00018418	1.61372	Up	-2.16898	Down	NA	NA	NA	NA	NA	K10523//speckle-type POZ protein	XP_003521551.2//PREDICTED: probable inactive serine/threonine-protein kinase fnkC [Glycine max];KHN28211.1//Ubiquitin carboxyl-terminal hydrolase 12 [Glycine soja]
Maker00008319	1.55946	Up	-6.48412	Down	-4.20833	Down	GO:0005829//cytosol	GO:0016614//oxidoreductase activity, acting on CH-OH group of donors;GO:0009055//electron transfer activity;GO:0051537//2 iron, 2 sulfur cluster binding;GO:0005506//iron ion binding;GO:0050660//flavin adenine dinucleotide binding;GO:0016903//oxidoreductase activity, acting on the aldehyde or oxo group of donors	NA	K09842//abscisic-aldehyde oxidase [EC:1.2.3.14]	KHM99113.1//Aldehyde oxidase 4 [Glycine soja]
Maker00017884	2.17331	Up	-3.55054	Down	NA	NA	GO:0016021//integral component of membrane;GO:0031225//anchored component of membrane	NA	GO:0010215//cellulose microfibril organization;GO:0016049//cell growth	K17964//leucine-rich PPR motif-containing protein, mitochondrial	XP_020240142.1//COBRA-like protein 4 [Cajanus cajan]
Maker00019638	1.09325	Up	-1.91069	Down	NA	NA	NA	GO:0016740//transferase activity	GO:0006541//glutamine metabolic process	K22314//glucosinolate gamma-glutamyl hydrolase [EC:3.4.19.16]	XP_019418260.1//PREDICTED: gamma-glutamyl peptidase 5-like [Lupinus angustifolius];XP_019425905.1//PREDICTED: gamma-glutamyl peptidase 5-like [Lupinus angustifolius]
Maker00014348	-2.41381	Down	NA	NA	-4.24749	Down	GO:0016021//integral component of membrane	GO:0005215//transporter activity	GO:0055085//transmembrane transport	K12818//ATP-dependent RNA helicase DHX8/PRP22 [EC:3.6.4.13]	XP_020240494.1//protein ZINC INDUCED FACILITATOR-LIKE 1 isoform X1 [Cajanus cajan];XP_020235833.1//protein ZINC INDUCED FACILITATOR-LIKE 1-like isoform X1 [Cajanus cajan]
Maker00001759	1.39136	Up	-4.25689	Down	NA	NA	GO:0016021//integral component of membrane	NA	GO:0055114//oxidation-reduction process	K02541//DNA replication licensing factor MCM3 [EC:3.6.4.12];K03189//urease accessory protein	KYP73335.1//hypothetical protein KK1_005955 [Cajanus cajan];XP_014522900.1//PREDICTED: cytochrome b561 domain-containing protein At4g18260-like isoform X2 [Vigna radiata var. radiata]
Maker00005384	-1.5071	Down	NA	NA	NA	NA	GO:0005634//nucleus	GO:0043565//sequence-specific DNA binding;GO:0003700//DNA binding transcription factor activity	NA	K09338//homeobox-leucine zipper protein	XP_017441838.1//PREDICTED: homeobox-leucine zipper protein ATHB-12-like [Vigna angularis]
Maker00006906	1.17611	Up	-4.1949	Down	-2.96552	Down	GO:0005871//kinesin complex	GO:0005524//ATP binding;GO:0003777//microtubule motor activity;GO:0008017//microtubule binding;GO:0016887//ATPase activity	GO:0007018//microtubule-based movement	K10406//kinesin family member C2/C3	XP_020238906.1//kinesin-like protein KIN-14I isoform X2 [Cajanus cajan]
Maker00016289	1.17432	Up	-3.31149	Down	-2.01745	Down	GO:0016021//integral component of membrane;GO:0005789//endoplasmic reticulum membrane	NA	NA	K20720//reticulon-4	XP_007138414.1//hypothetical protein PHAVU_009G206800g [Phaseolus vulgaris]
Maker00021080	2.18236	Up	-2.64324	Down	NA	NA	GO:0005576//extracellular region	NA	NA	K20412//peptidase inhibitor 16	XP_018820825.1//PREDICTED: pathogenesis-related protein PR-1-like [Juglans regia]
Maker00000965	1.69585	Up	-2.83354	Down	-1.09423	Down	GO:0048046//apoplast	GO:0016722//oxidoreductase activity, oxidizing metal ions;GO:0052716//hydroquinone:oxygen oxidoreductase activity;GO:0005507//copper ion binding	GO:0046274//lignin catabolic process	K05909//laccase [EC:1.10.3.2]	XP_014502751.1//PREDICTED: laccase-5 [Vigna radiata var. radiata]
Maker00015719	1.02461	Up	NA	NA	NA	NA	GO:0016021//integral component of membrane;GO:0005886//plasma membrane	GO:0004674//protein serine/threonine kinase activity;GO:0005524//ATP binding;GO:0004675//transmembrane receptor protein serine/threonine kinase activity	GO:0006468//protein phosphorylation;GO:0007166//cell surface receptor signaling pathway	K00924//kinase [EC:2.7.1.-]	XP_020226085.1//receptor-like kinase TMK4 [Cajanus cajan]
Maker00011887	1.00148	Up	NA	NA	NA	NA	GO:0016021//integral component of membrane	GO:0005524//ATP binding;GO:0004672//protein kinase activity	NA	K04733//interleukin-1 receptor-associated kinase 4 [EC:2.7.11.1]	XP_003525827.1//PREDICTED: probable LRR receptor-like serine/threonine-protein kinase At4g37250 [Glycine max]
BGI_novel_G003245	1.12156	Up	NA	NA	NA	NA	GO:0016021//integral component of membrane	GO:0043531//ADP binding	GO:0007165//signal transduction;GO:0006952//defense response	K22038//volume-regulated anion channel;K19613//leucine-rich repeat protein SHOC2	XP_004499788.1//PREDICTED: TMV resistance protein N-like [Cicer arietinum]
Maker00023479	1.39127	Up	-3.16324	Down	-1.73399	Down	NA	GO:0004674//protein serine/threonine kinase activity;GO:0005524//ATP binding	NA	K17535//serine/threonine-protein kinase TNNI3K [EC:2.7.11.1];K04365//B-Raf proto-oncogene serine/threonine-protein kinase [EC:2.7.11.1]	XP_009768190.1//PREDICTED: serine/threonine-protein kinase HT1-like isoform X2 [Nicotiana sylvestris];XP_007154003.1//hypothetical protein PHAVU_003G082800g [Phaseolus vulgaris]
Maker00007336	1.60098	Up	-1.32648	Down	NA	NA	NA	GO:0004674//protein serine/threonine kinase activity;GO:0005524//ATP binding	NA	K08790//serine/threonine kinase 38 [EC:2.7.11.1]	XP_020204788.1//serine/threonine-protein kinase tricorner-like [Cajanus cajan]
Maker00020876	-1.39625	Down	2.27277	Up	NA	NA	GO:0005634//nucleus	GO:0003677//DNA binding	GO:0006355//regulation of transcription, DNA-templated;GO:0006351//transcription, DNA-templated	K12862//pleiotropic regulator 1;K13126//polyadenylate-binding protein;K03094//S-phase kinase-associated protein 1;K00521//ferric-chelate reductase [EC:1.16.1.7];K05941//glutathione gamma-glutamylcysteinyltransferase [EC:2.3.2.15];K16296//serine carboxypeptidase-like clade I [EC:3.4.16.-]	XP_017427630.1//PREDICTED: NAC transcription factor 29-like [Vigna angularis];XP_020236734.1//NAC transcription factor 29-like isoform X2 [Cajanus cajan]
Maker00023523	2.304	Up	-3.4334	Down	NA	NA	GO:0016021//integral component of membrane	NA	NA	K15503//serine/threonine-protein phosphatase 6 regulatory ankyrin repeat subunit B;K15502//serine/threonine-protein phosphatase 6 regulatory ankyrin repeat subunit A;K00895//diphosphate-dependent phosphofructokinase [EC:2.7.1.90]	XP_020205315.1//ankyrin repeat-containing protein NPR4-like [Cajanus cajan];XP_003548612.2//PREDICTED: uncharacterized protein LOC100788731 isoform X1 [Glycine max]
Maker00006839	1.27359	Up	-2.29738	Down	NA	NA	NA	GO:0046872//metal ion binding;GO:0003676//nucleic acid binding	NA	K14794//ribosomal RNA-processing protein 12;K22410;K12309//beta-galactosidase [EC:3.2.1.23]	XP_007152626.1//hypothetical protein PHAVU_004G145900g [Phaseolus vulgaris]
Maker00001410	1.34754	Up	-2.45598	Down	-1.05855	Down	NA	GO:0005524//ATP binding	GO:0019538//protein metabolic process	K03695//ATP-dependent Clp protease ATP-binding subunit ClpB	XP_019415402.1//PREDICTED: protein SMAX1-LIKE 6-like isoform X1 [Lupinus angustifolius];XP_020223788.1//protein SMAX1-LIKE 8-like isoform X1 [Cajanus cajan]
Maker00006889	1.73489	Up	-2.79993	Down	NA	NA	NA	NA	NA	K17987//next to BRCA1 gene 1 protein;K04733//interleukin-1 receptor-associated kinase 4 [EC:2.7.11.1];K14306//nuclear pore complex protein Nup62	XP_016190780.1//thaumatin-like protein [Arachis ipaensis]
Maker00014839	1.3794	Up	NA	NA	NA	NA	GO:0016021//integral component of membrane;GO:0046658//anchored component of plasma membrane	GO:0004553//hydrolase activity, hydrolyzing O-glycosyl compounds;GO:0030247//polysaccharide binding	GO:0005975//carbohydrate metabolic process	K19891//glucan endo-1,3-beta-glucosidase 1/2/3 [EC:3.2.1.39]	XP_020228482.1//glucan endo-1,3-beta-glucosidase 14 [Cajanus cajan];XP_020228908.1//glucan endo-1,3-beta-glucosidase 14-like [Cajanus cajan]
Maker00006542	1.63075	Up	NA	NA	NA	NA	GO:0005576//extracellular region	GO:0045735//nutrient reservoir activity;GO:0030145//manganese ion binding	NA	K00384//thioredoxin reductase (NADPH) [EC:1.8.1.9]	XP_004489241.1//PREDICTED: putative germin-like protein 2-1 [Cicer arietinum]
Maker00020386	1.82581	Up	-3.85627	Down	-1.94618	Down	NA	GO:0005524//ATP binding;GO:0003824//catalytic activity	NA	K01648//ATP citrate (pro-S)-lyase [EC:2.3.3.8]	XP_019421515.1//PREDICTED: ATP-citrate synthase alpha chain protein 1-like isoform X1 [Lupinus angustifolius]
Maker00005742	1.7016	Up	NA	NA	NA	NA	GO:0016021//integral component of membrane	NA	NA	K02184//formin 2	XP_003548427.1//PREDICTED: formin-like protein 1 [Glycine max]
Maker00019851	1.5024	Up	-2.64678	Down	NA	NA	NA	NA	NA	K17710//pentatricopeptide repeat domain-containing protein 1;K11426//SET and MYND domain-containing protein	XP_006598227.1//PREDICTED: uncharacterized protein LOC100810457 [Glycine max]
Maker00023510	1.57185	Up	-1.32229	Down	NA	NA	NA	GO:0004252//serine-type endopeptidase activity	NA	K12619//5'-3' exoribonuclease 2 [EC:3.1.13.-];K13199//plasminogen activator inhibitor 1 RNA-binding protein;K15333//tRNA guanosine-2'-O-methyltransferase [EC:2.1.1.34];K14568//rRNA small subunit pseudouridine methyltransferase Nep1 [EC:2.1.1.260]	XP_003540860.1//PREDICTED: subtilisin-like protease SBT1.6 [Glycine max]
BGI_novel_G000256	1.37373	Up	NA	NA	NA	NA	NA	GO:0003824//catalytic activity;GO:0050662//coenzyme binding	NA	K09753//cinnamoyl-CoA reductase [EC:1.2.1.44]	XP_004491683.1//PREDICTED: cinnamoyl-CoA reductase 1-like [Cicer arietinum]
Maker00008217	1.05683	Up	-1.91123	Down	NA	NA	NA	GO:0046872//metal ion binding;GO:0005524//ATP binding;GO:0004478//methionine adenosyltransferase activity	GO:0006730//one-carbon metabolic process;GO:0006556//S-adenosylmethionine biosynthetic process	K00789//S-adenosylmethionine synthetase [EC:2.5.1.6]	XP_019254761.1//PREDICTED: S-adenosylmethionine synthase 1 [Nicotiana attenuata];XP_009589856.1//PREDICTED: S-adenosylmethionine synthase 1 [Nicotiana tomentosiformis]
Maker00003694	1.41129	Up	-1.8378	Down	NA	NA	GO:0005874//microtubule;GO:0005871//kinesin complex	GO:0005524//ATP binding;GO:0003777//microtubule motor activity;GO:0008017//microtubule binding;GO:0016887//ATPase activity	GO:0007018//microtubule-based movement	K10405//kinesin family member C1	XP_003540037.1//PREDICTED: kinesin-3-like [Glycine max]
Maker00008241	1.11408	Up	-2.70665	Down	NA	NA	GO:0009505//plant-type cell wall;GO:0005618//cell wall;GO:0005576//extracellular region	GO:0052793//pectin acetylesterase activity;GO:0016787//hydrolase activity	GO:0071555//cell wall organization	K19882//O-palmitoleoyl-L-serine hydrolase [EC:3.1.1.98]	XP_020226162.1//pectin acetylesterase 6-like [Cajanus cajan];KHN43400.1//Protein notum like [Glycine soja]
Maker00024130	1.98335	Up	-3.0043	Down	NA	NA	GO:0016021//integral component of membrane	NA	NA	NA	XP_017439461.1//PREDICTED: uncharacterized protein LOC108345374 [Vigna angularis];XP_003525756.1//PREDICTED: UPF0481 protein At3g47200-like [Glycine max]
Maker00008068	-2.73959	Down	NA	NA	-3.67134	Down	GO:0005618//cell wall	GO:0045330//aspartyl esterase activity;GO:0004857//enzyme inhibitor activity;GO:0030599//pectinesterase activity	GO:0045490//pectin catabolic process;GO:0042545//cell wall modification	K01051//pectinesterase [EC:3.1.1.11]	XP_019426827.1//PREDICTED: pectinesterase-like [Lupinus angustifolius]
Maker00000210	-3.18371	Down	NA	NA	-4.32735	Down	GO:0016020//membrane;GO:0016021//integral component of membrane	GO:0016709//oxidoreductase activity, acting on paired donors, with incorporation or reduction of molecular oxygen, NAD(P)H as one donor, and incorporation of one atom of oxygen;GO:0016705//oxidoreductase activity, acting on paired donors, with incorporation or reduction of molecular oxygen;GO:0020037//heme binding;GO:0005506//iron ion binding;GO:0004497//monooxygenase activity	GO:0044550//secondary metabolite biosynthetic process	K12153//phenylalanine N-monooxygenase [EC:1.14.14.40]	KHN24730.1//Isoleucine N-monooxygenase 2 [Glycine soja];XP_003543894.1//PREDICTED: isoleucine N-monooxygenase 2-like [Glycine max]
Maker00011050	-1.0447	Down	1.11293	Up	NA	NA	GO:0016021//integral component of membrane	NA	NA	K03252//translation initiation factor 3 subunit C	XP_016197312.1//uncharacterized protein LOC107638512 isoform X1 [Arachis ipaensis];XP_020976174.1//uncharacterized protein LOC107638512 isoform X2 [Arachis ipaensis]
Maker00017165	-1.65081	Down	NA	NA	NA	NA	GO:0016021//integral component of membrane	NA	NA	K13783//MFS transporter, OPA family, solute carrier family 37 (glycerol-3-phosphate transporter), member 1/2	KRH50017.1//hypothetical protein GLYMA_07G195300 [Glycine max]
Maker00009763	1.30027	Up	NA	NA	NA	NA	NA	NA	NA	K18327//RNA exonuclease 4 [EC:3.1.-.-]	XP_015887599.1//PREDICTED: uncharacterized protein LOC107422638 [Ziziphus jujuba]
Maker00023007	-1.85975	Down	3.30184	Up	NA	NA	NA	NA	NA	NA	XP_003613117.1//PB1 domain protein [Medicago truncatula]
Maker00002350	-1.40746	Down	NA	NA	-1.8256	Down	NA	NA	NA	NA	XP_018805490.1//PREDICTED: uncharacterized protein LOC108979291 [Juglans regia]
Maker00022719	2.93892	Up	-4.09002	Down	NA	NA	NA	GO:0016740//transferase activity	NA	K00799//glutathione S-transferase [EC:2.5.1.18]	XP_020975911.1//pentatricopeptide repeat-containing protein At1g05670, mitochondrial [Arachis ipaensis];KJB44315.1//hypothetical protein B456_007G245500 [Gossypium raimondii]
Maker00012531	4.21498	Up	-7.47363	Down	-2.65512	Down	NA	NA	NA	K19519//transforming growth factor-beta-induced protein	XP_003539721.1//PREDICTED: fasciclin-like arabinogalactan protein 12 [Glycine max]
Maker00014659	-1.21643	Down	NA	NA	NA	NA	NA	GO:0016702//oxidoreductase activity, acting on single donors with incorporation of molecular oxygen, incorporation of two atoms of oxygen;GO:0046872//metal ion binding	GO:0031408//oxylipin biosynthetic process	K15718//linoleate 9S-lipoxygenase [EC:1.13.11.58]	XP_019436509.1//PREDICTED: seed linoleate 9S-lipoxygenase-3 [Lupinus angustifolius]
Maker00000539	1.3774	Up	-1.71919	Down	NA	NA	NA	NA	NA	K23050	XP_021831915.1//isoflavone reductase-like protein [Prunus avium]
Maker00018726	2.28192	Up	-3.96243	Down	NA	NA	GO:0016021//integral component of membrane	NA	NA	NA	KYP70249.1//hypothetical protein KK1_009460 [Cajanus cajan];XP_020213593.1//uncharacterized protein LOC109797853 [Cajanus cajan]
BGI_novel_G000107	3.91411	Up	-5.56375	Down	NA	NA	NA	NA	NA	K13457//disease resistance protein RPM1	XP_020982664.1//disease resistance protein RPM1-like [Arachis duranensis]
Maker00013816	-1.75369	Down	3.975	Up	2.15065	Up	NA	GO:0016705//oxidoreductase activity, acting on paired donors, with incorporation or reduction of molecular oxygen;GO:0020037//heme binding;GO:0005506//iron ion binding	NA	K01723//hydroperoxide dehydratase [EC:4.2.1.92]	KRH29541.1//hypothetical protein GLYMA_11G122700 [Glycine max]
Maker00006051	1.33906	Up	NA	NA	NA	NA	NA	NA	NA	K14411//RNA-binding protein Musashi	XP_003546016.1//PREDICTED: protein IQ-DOMAIN 1 [Glycine max]
Maker00001186	-1.44291	Down	NA	NA	-2.5054	Down	GO:0005737//cytoplasm;GO:0031941//filamentous actin	GO:0051015//actin filament binding;GO:0004553//hydrolase activity, hydrolyzing O-glycosyl compounds	GO:0007015//actin filament organization;GO:0016477//cell migration;GO:0007163//establishment or maintenance of cell polarity;GO:0051017//actin filament bundle assembly;GO:0005975//carbohydrate metabolic process	K04733//interleukin-1 receptor-associated kinase 4 [EC:2.7.11.1];K01210//glucan 1,3-beta-glucosidase [EC:3.2.1.58]	XP_020210341.1//glucan 1,3-beta-glucosidase A-like [Cajanus cajan]
BGI_novel_G002563	-2.07372	Down	3.96883	Up	NA	NA	NA	GO:0008270//zinc ion binding;GO:0003676//nucleic acid binding	NA	NA	OTG34128.1//putative reverse transcriptase domain, Zinc finger, CCHC-type, Aspartic peptidase domain protein [Helianthus annuus]
Maker00011201	-1.39627	Down	1.7374	Up	NA	NA	GO:0016021//integral component of membrane;GO:0005886//plasma membrane	GO:0051536//iron-sulfur cluster binding	NA	K02923//large subunit ribosomal protein L38e;K20855//beta-1,3-galactosyltransferase 1/2/3/4/5/7/8 [EC:2.4.1.-]	XP_020209095.1//CASP-like protein 2D1 [Cajanus cajan];XP_008359283.1//PREDICTED: CASP-like protein 2D1 [Malus domestica]
BGI_novel_G002297	-1.09414	Down	NA	NA	NA	NA	GO:0005634//nucleus	GO:0003676//nucleic acid binding	NA	K12830//splicing factor 3B subunit 3	XP_019444144.1//PREDICTED: DNA damage-binding protein 1 isoform X2 [Lupinus angustifolius]
BGI_novel_G000368	-4.22724	Down	NA	NA	NA	NA	GO:0016021//integral component of membrane;GO:0005886//plasma membrane	GO:0004674//protein serine/threonine kinase activity;GO:0005524//ATP binding	GO:0048544//recognition of pollen;GO:0006468//protein phosphorylation	K04733//interleukin-1 receptor-associated kinase 4 [EC:2.7.11.1]	XP_020240469.1//putative receptor protein kinase ZmPK1 [Cajanus cajan]
Maker00007613	1.11536	Up	NA	NA	2.07696	Up	GO:0005634//nucleus	GO:0003677//DNA binding	GO:0006355//regulation of transcription, DNA-templated;GO:0006351//transcription, DNA-templated	K05941//glutathione gamma-glutamylcysteinyltransferase [EC:2.3.2.15]	XP_019434405.1//PREDICTED: NAC domain-containing protein 100-like [Lupinus angustifolius];OIV89539.1//hypothetical protein TanjilG_19906 [Lupinus angustifolius]
Maker00013517	1.0455	Up	-2.74617	Down	-1.65833	Down	NA	GO:0016157//sucrose synthase activity;GO:0046524//sucrose-phosphate synthase activity	GO:0005985//sucrose metabolic process	K00696//sucrose-phosphate synthase [EC:2.4.1.14]	XP_020223683.1//probable sucrose-phosphate synthase 4 isoform X2 [Cajanus cajan];XP_014501685.1//PREDICTED: probable sucrose-phosphate synthase 4 isoform X2 [Vigna radiata var. radiata]
Maker00013674	1.94035	Up	-1.51402	Down	NA	NA	GO:0016021//integral component of membrane	NA	NA	K06699//proteasome activator subunit 4;K12472//epidermal growth factor receptor substrate 15	XP_007136175.1//hypothetical protein PHAVU_009G024400g [Phaseolus vulgaris];AFK37637.1//unknown [Lotus japonicus]
Maker00014266	3.15109	Up	-2.90668	Down	NA	NA	NA	NA	NA	K13420//LRR receptor-like serine/threonine-protein kinase FLS2 [EC:2.7.11.1]	XP_004510977.1//PREDICTED: DNA-damage-repair/toleration protein DRT100 [Cicer arietinum]
Maker00000283	1.66009	Up	-3.7448	Down	NA	NA	GO:0005794//Golgi apparatus;GO:0016021//integral component of membrane	GO:0016413//O-acetyltransferase activity	GO:0071554//cell wall organization or biogenesis	NA	XP_019417468.1//PREDICTED: protein trichome berefringence-like 7 isoform X2 [Lupinus angustifolius]
Maker00014093	1.11218	Up	-1.29838	Down	NA	NA	NA	GO:0003676//nucleic acid binding	NA	K10773//endonuclease III [EC:4.2.99.18]	XP_020210128.1//zinc finger protein 4-like [Cajanus cajan]
BGI_novel_G000633	1.14699	Up	-4.78344	Down	-3.44052	Down	GO:0016021//integral component of membrane	GO:0046872//metal ion binding;GO:0030570//pectate lyase activity	GO:0045490//pectin catabolic process	K01728//pectate lyase [EC:4.2.2.2]	XP_006590673.1//PREDICTED: probable pectate lyase 4 [Glycine max]
Maker00002049	1.65324	Up	NA	NA	NA	NA	GO:0005794//Golgi apparatus;GO:0016021//integral component of membrane	GO:0016413//O-acetyltransferase activity	GO:0071554//cell wall organization or biogenesis	NA	XP_020219966.1//protein trichome birefringence-like 34 [Cajanus cajan]
Maker00013984	-1.15905	Down	NA	NA	-1.94875	Down	GO:0016021//integral component of membrane;GO:0005886//plasma membrane	GO:0004674//protein serine/threonine kinase activity;GO:0005524//ATP binding;GO:0004672//protein kinase activity	GO:0006468//protein phosphorylation	K04733//interleukin-1 receptor-associated kinase 4 [EC:2.7.11.1]	XP_014513795.1//PREDICTED: putative receptor-like protein kinase At4g00960 isoform X3 [Vigna radiata var. radiata];KHN15816.1//Cysteine-rich receptor-like protein kinase 25 [Glycine soja];XP_004496784.1//PREDICTED: putative receptor-like protein kinase At4g00960 isoform X1 [Cicer arietinum];XP_013469899.1//cysteine-rich receptor-kinase-like protein [Medicago truncatula]
Maker00012167	1.48341	Up	-3.34627	Down	NA	NA	GO:0005576//extracellular region	GO:0004650//polygalacturonase activity	GO:0005975//carbohydrate metabolic process;GO:0071555//cell wall organization	K01184//polygalacturonase [EC:3.2.1.15]	XP_003551949.1//PREDICTED: probable polygalacturonase [Glycine max]
Maker00002484	2.47166	Up	-3.15907	Down	NA	NA	GO:0048046//apoplast	GO:0052716//hydroquinone:oxygen oxidoreductase activity;GO:0005507//copper ion binding	GO:0046274//lignin catabolic process	K05909//laccase [EC:1.10.3.2]	XP_007208294.1//laccase-17 [Prunus persica]
Maker00015182	1.94774	Up	NA	NA	NA	NA	GO:0005634//nucleus	GO:0008270//zinc ion binding;GO:0043565//sequence-specific DNA binding;GO:0003700//DNA binding transcription factor activity	GO:0006351//transcription, DNA-templated;GO:0045893//positive regulation of transcription, DNA-templated	K17895//GATA-binding protein 3;K21630//GATA-type zinc finger protein 1	XP_007135644.1//hypothetical protein PHAVU_010G146300g [Phaseolus vulgaris]
Maker00005974	-3.36256	Down	2.85237	Up	NA	NA	GO:0005615//extracellular space;GO:0005576//extracellular region	GO:0004553//hydrolase activity, hydrolyzing O-glycosyl compounds;GO:0008061//chitin binding;GO:0004568//chitinase activity	GO:0006032//chitin catabolic process;GO:0005975//carbohydrate metabolic process;GO:0000272//polysaccharide catabolic process	K01183//chitinase [EC:3.2.1.14]	NP_001316758.1//acidic endochitinase precursor [Vigna angularis]
BGI_novel_G001265	1.74423	Up	-3.03215	Down	NA	NA	NA	GO:0004252//serine-type endopeptidase activity	NA	K12619//5'-3' exoribonuclease 2 [EC:3.1.13.-];K15333//tRNA guanosine-2'-O-methyltransferase [EC:2.1.1.34];K14568//rRNA small subunit pseudouridine methyltransferase Nep1 [EC:2.1.1.260]	XP_006590070.1//PREDICTED: cucumisin-like [Glycine max]
Maker00009819	1.12974	Up	-3.2181	Down	-1.9408	Down	NA	NA	NA	NA	XP_014501800.1//PREDICTED: uncharacterized protein LOC106762414 [Vigna radiata var. radiata]
Maker00020783	-1.24965	Down	1.17	Up	NA	NA	GO:0016021//integral component of membrane	GO:0015079//potassium ion transmembrane transporter activity	NA	K03549//KUP system potassium uptake protein	XP_015957928.1//probable potassium transporter 17 [Arachis duranensis]
Maker00017093	-1.204	Down	NA	NA	NA	NA	NA	NA	NA	K20855//beta-1,3-galactosyltransferase 1/2/3/4/5/7/8 [EC:2.4.1.-]	XP_004494210.1//PREDICTED: uncharacterized protein LOC101490790 [Cicer arietinum]
Maker00017961	2.27525	Up	-3.16306	Down	NA	NA	NA	GO:0003993//acid phosphatase activity	NA	K20728//vegetative storage protein 2;K02866//large subunit ribosomal protein L10e	XP_020220333.1//acid phosphatase 1 [Cajanus cajan]
Maker00000241	1.33296	Up	NA	NA	NA	NA	NA	GO:0016157//sucrose synthase activity	GO:0005985//sucrose metabolic process	K00695//sucrose synthase [EC:2.4.1.13]	KOM47097.1//hypothetical protein LR48_Vigan07g080100 [Vigna angularis];XP_007141969.1//hypothetical protein PHAVU_008G241300g [Phaseolus vulgaris]
Maker00009926	1.8767	Up	-4.35709	Down	-2.32471	Down	NA	GO:0004190//aspartic-type endopeptidase activity	NA	K01379//cathepsin D [EC:3.4.23.5];K01381//saccharopepsin [EC:3.4.23.25]	XP_016163698.1//aspartyl protease AED3 [Arachis ipaensis]
Maker00021240	1.02887	Up	NA	NA	NA	NA	NA	GO:0016628//oxidoreductase activity, acting on the CH-CH group of donors, NAD or NADP as acceptor;GO:0045550//geranylgeranyl reductase activity	GO:0015979//photosynthesis;GO:0015995//chlorophyll biosynthetic process	K10960//geranylgeranyl diphosphate/geranylgeranyl-bacteriochlorophyllide a reductase [EC:1.3.1.83 1.3.1.111]	XP_003549679.1//PREDICTED: geranylgeranyl diphosphate reductase, chloroplastic [Glycine max]
Maker00019824	-1.11909	Down	2.15195	Up	NA	NA	NA	GO:0016491//oxidoreductase activity	NA	NA	XP_019454376.1//PREDICTED: uncharacterized protein LOC109355597 isoform X1 [Lupinus angustifolius];KRH23883.1//hypothetical protein GLYMA_12G008700 [Glycine max];KRH23885.1//hypothetical protein GLYMA_12G008700 [Glycine max]
Maker00015660	2.1101	Up	-2.70871	Down	NA	NA	NA	NA	NA	K13346//peroxin-10	XP_015889360.1//PREDICTED: uncharacterized protein LOC107424135 [Ziziphus jujuba]
Maker00013289	1.25923	Up	NA	NA	NA	NA	GO:0031965//nuclear membrane;GO:0005887//integral component of plasma membrane;GO:0016021//integral component of membrane	GO:0005249//voltage-gated potassium channel activity;GO:0044325//ion channel binding	GO:0042391//regulation of membrane potential	K05391//cyclic nucleotide gated channel, plant	XP_004487089.1//PREDICTED: putative cyclic nucleotide-gated ion channel 15 [Cicer arietinum];XP_013465310.1//cyclic nucleotide-gated ion channel-like protein [Medicago truncatula]
Maker00008731	1.69642	Up	-1.5658	Down	NA	NA	GO:0016021//integral component of membrane	NA	NA	NA	XP_004501847.1//PREDICTED: protein SIEVE ELEMENT OCCLUSION B-like [Cicer arietinum]
Maker00008691	1.38565	Up	-2.55329	Down	NA	NA	GO:0005634//nucleus	GO:0003677//DNA binding	GO:0006355//regulation of transcription, DNA-templated	K04733//interleukin-1 receptor-associated kinase 4 [EC:2.7.11.1];K20043//clathrin coat assembly protein AP180;K09326//homeobox protein OTX1;K16222//Dof zinc finger protein DOF5.5	XP_017420790.1//PREDICTED: dof zinc finger protein DOF5.6-like [Vigna angularis]
Maker00003974	2.29225	Up	-5.14899	Down	NA	NA	GO:0016021//integral component of membrane	NA	NA	K13420//LRR receptor-like serine/threonine-protein kinase FLS2 [EC:2.7.11.1]	BAO45886.1//leucine-rich repeat extensin-like protein [Acacia mangium]
BGI_novel_G000451	2.07455	Up	NA	NA	NA	NA	GO:0009505//plant-type cell wall	GO:0052692//raffinose alpha-galactosidase activity	GO:0005975//carbohydrate metabolic process	K07407//alpha-galactosidase [EC:3.2.1.22]	KRH34285.1//hypothetical protein GLYMA_10G174600 [Glycine max]
Maker00018850	-1.17914	Down	NA	NA	-1.52274	Down	GO:0005783//endoplasmic reticulum	NA	NA	NA	KRH63622.1//hypothetical protein GLYMA_04G187900 [Glycine max]
Maker00005709	1.68215	Up	NA	NA	NA	NA	NA	GO:0004185//serine-type carboxypeptidase activity	NA	K16296//serine carboxypeptidase-like clade I [EC:3.4.16.-]	XP_004510209.1//PREDICTED: serine carboxypeptidase-like 20 [Cicer arietinum]
Maker00020981	-1.05232	Down	2.31798	Up	1.21668	Up	GO:0005634//nucleus	GO:0003677//DNA binding	GO:0006355//regulation of transcription, DNA-templated;GO:0006351//transcription, DNA-templated	K13126//polyadenylate-binding protein;K05941//glutathione gamma-glutamylcysteinyltransferase [EC:2.3.2.15]	XP_003549684.1//PREDICTED: NAC domain-containing protein 100 [Glycine max];KRH56897.1//hypothetical protein GLYMA_05G025500 [Glycine max]
BGI_novel_G002334	1.57595	Up	-4.72623	Down	-2.78531	Down	NA	NA	NA	NA	XP_021621437.1//uncharacterized protein LOC110621462 [Manihot esculenta]
Maker00007312	2.1663	Up	-3.31148	Down	NA	NA	GO:0016020//membrane;GO:0016021//integral component of membrane	GO:0016301//kinase activity	GO:0007165//signal transduction	K15503//serine/threonine-protein phosphatase 6 regulatory ankyrin repeat subunit B	XP_020202013.1//uncharacterized protein LOC109787847 [Cajanus cajan]
Maker00020275	1.05988	Up	NA	NA	1.24919	Up	NA	GO:0016740//transferase activity	NA	K19761//gamma-glutamylaminecyclotransferase [EC:2.3.2.-]	XP_003517678.1//PREDICTED: putative gamma-glutamylcyclotransferase At3g02910 [Glycine max]
Maker00010446	1.56153	Up	-2.34552	Down	NA	NA	GO:0016021//integral component of membrane;GO:0005773//vacuole	NA	NA	NA	XP_019435146.1//PREDICTED: uncharacterized protein LOC109341660 isoform X2 [Lupinus angustifolius]
Maker00010407	-3.69867	Down	NA	NA	-5.80725	Down	GO:0016021//integral component of membrane;GO:0005886//plasma membrane	GO:0051980//iron-nicotianamine transmembrane transporter activity	GO:0048316//seed development;GO:0055085//transmembrane transport;GO:0010039//response to iron ion	K15363//fanconi-associated nuclease 1 [EC:3.1.21.- 3.1.4.1];K01807//ribose 5-phosphate isomerase A [EC:5.3.1.6]	XP_007136481.1//hypothetical protein PHAVU_009G048800g [Phaseolus vulgaris];KHN19530.1//Metal-nicotianamine transporter YSL3 [Glycine soja]
Maker00005808	-1.86596	Down	NA	NA	NA	NA	GO:0016021//integral component of membrane	GO:0005345//purine nucleobase transmembrane transporter activity	NA	K06901//putative MFS transporter, AGZA family, xanthine/uracil permease	XP_020218657.1//adenine/guanine permease AZG1-like [Cajanus cajan]
BGI_novel_G002711	1.94633	Up	NA	NA	1.18185	Up	NA	GO:0016747//transferase activity, transferring acyl groups other than amino-acyl groups	NA	K19861//benzyl alcohol O-benzoyltransferase [EC:2.3.1.196 2.3.1.232]	XP_019413732.1//PREDICTED: benzyl alcohol O-benzoyltransferase-like [Lupinus angustifolius]
Maker00007347	1.28049	Up	NA	NA	NA	NA	GO:0005576//extracellular region	GO:0046872//metal ion binding;GO:0020037//heme binding;GO:0004601//peroxidase activity	GO:0006979//response to oxidative stress;GO:0042744//hydrogen peroxide catabolic process	K00430//peroxidase [EC:1.11.1.7]	XP_020213368.1//peroxidase A2-like [Cajanus cajan]
Maker00010182	2.32461	Up	-4.47527	Down	NA	NA	NA	NA	NA	K03695//ATP-dependent Clp protease ATP-binding subunit ClpB;K08332//vacuolar protein 8	XP_004498787.1//PREDICTED: U-box domain-containing protein 6 [Cicer arietinum]
BGI_novel_G001678	1.30392	Up	-1.842	Down	NA	NA	NA	NA	NA	NA	XP_022148226.1//non-specific lipid-transfer protein 2-like [Momordica charantia]
Maker00014219	2.09036	Up	-4.75022	Down	NA	NA	NA	GO:0004252//serine-type endopeptidase activity	NA	K12619//5'-3' exoribonuclease 2 [EC:3.1.13.-];K13199//plasminogen activator inhibitor 1 RNA-binding protein;K15333//tRNA guanosine-2'-O-methyltransferase [EC:2.1.1.34];K14568//rRNA small subunit pseudouridine methyltransferase Nep1 [EC:2.1.1.260]	XP_004514295.1//PREDICTED: CO(2)-response secreted protease-like [Cicer arietinum]
BGI_novel_G001477	1.19769	Up	-1.21521	Down	NA	NA	NA	GO:0008964//phosphoenolpyruvate carboxylase activity	GO:0006099//tricarboxylic acid cycle;GO:0015977//carbon fixation	K01595//phosphoenolpyruvate carboxylase [EC:4.1.1.31]	XP_016182677.1//phosphoenolpyruvate carboxylase 2 [Arachis ipaensis]
Maker00017347	1.79014	Up	NA	NA	NA	NA	GO:0016021//integral component of membrane	GO:0042284//sphingolipid delta-4 desaturase activity	GO:0030148//sphingolipid biosynthetic process	K04712//sphingolipid 4-desaturase/C4-monooxygenase [EC:1.14.19.17 1.14.18.5]	GAU47743.1//hypothetical protein TSUD_387020 [Trifolium subterraneum];EOY28285.1//Fatty acid desaturase family protein isoform 1 [Theobroma cacao]
Maker00005733	-1.35118	Down	-1.57689	Down	-2.90652	Down	GO:0005623//cell	GO:0004322//ferroxidase activity;GO:0008199//ferric iron binding	GO:0006879//cellular iron ion homeostasis;GO:0006826//iron ion transport	K00522//ferritin heavy chain [EC:1.16.3.2]	O65100.1//RecName: Full=Ferritin-3, chloroplastic; Flags: Precursor
Maker00003721	2.34689	Up	-4.1243	Down	NA	NA	GO:0016021//integral component of membrane	NA	NA	K15285//solute carrier family 35, member E3	XP_006488075.1//PREDICTED: uncharacterized membrane protein At1g06890 [Citrus sinensis];XP_002285229.1//PREDICTED: uncharacterized membrane protein At1g06890 [Vitis vinifera]
Maker00015739	1.22198	Up	NA	NA	NA	NA	GO:0005774//vacuolar membrane;GO:0016021//integral component of membrane;GO:0005886//plasma membrane	GO:0015386//potassium:proton antiporter activity;GO:0015385//sodium:proton antiporter activity	GO:0098719//sodium ion import across plasma membrane;GO:0055075//potassium ion homeostasis;GO:0009651//response to salt stress;GO:0006885//regulation of pH;GO:0051453//regulation of intracellular pH;GO:0071805//potassium ion transmembrane transport	K14724//solute carrier family 9 (sodium/hydrogen exchanger), member 8	XP_020226995.1//sodium/hydrogen exchanger 2-like [Cajanus cajan];XP_019450822.1//PREDICTED: sodium/hydrogen exchanger 2-like [Lupinus angustifolius]
BGI_novel_G001054	1.00861	Up	NA	NA	NA	NA	GO:0009506//plasmodesma;GO:0005829//cytosol	GO:0003939//L-iditol 2-dehydrogenase activity;GO:0008270//zinc ion binding;GO:0016491//oxidoreductase activity	NA	K00008//L-iditol 2-dehydrogenase [EC:1.1.1.14]	XP_020203742.1//sorbitol dehydrogenase [Cajanus cajan]
Maker00024499	1.16711	Up	-3.12854	Down	-1.91981	Down	NA	GO:0016866//intramolecular transferase activity	NA	K20659//lupeol synthase [EC:5.4.99.41]	XP_006606308.1//PREDICTED: lupeol synthase [Glycine max];KRG92127.1//hypothetical protein GLYMA_20G192700 [Glycine max]
Maker00004485	1.51785	Up	-4.15741	Down	-2.56467	Down	NA	NA	NA	K14611//solute carrier family 23 (nucleobase transporter), member 1/2;K08234//glyoxylase I family protein	XP_010113383.1//hypothetical protein L484_026715 [Morus notabilis]
Maker00023855	2.51453	Up	NA	NA	NA	NA	GO:0005622//intracellular	GO:0005215//transporter activity	NA	K19996//phosphatidylinositol transfer protein SFH5;K02433//aspartyl-tRNA(Asn)/glutamyl-tRNA(Gln) amidotransferase subunit A [EC:6.3.5.6 6.3.5.7]	XP_012571476.1//PREDICTED: phosphatidylinositol/phosphatidylcholine transfer protein SFH3-like isoform X2 [Cicer arietinum]
Maker00018624	1.30927	Up	NA	NA	1.35139	Up	NA	NA	NA	K17710//pentatricopeptide repeat domain-containing protein 1;K11426//SET and MYND domain-containing protein	XP_012575212.1//PREDICTED: uncharacterized protein LOC101510450 [Cicer arietinum];KHN43571.1//hypothetical protein glysoja_002154 [Glycine soja]
Maker00023456	2.24849	Up	-4.29186	Down	NA	NA	GO:0016021//integral component of membrane	NA	GO:0055114//oxidation-reduction process	K02541//DNA replication licensing factor MCM3 [EC:3.6.4.12];K03189//urease accessory protein	XP_004504684.1//PREDICTED: cytochrome b561 domain-containing protein At4g18260-like isoform X1 [Cicer arietinum]
Maker00001336	2.21385	Up	-2.60037	Down	NA	NA	NA	GO:0005509//calcium ion binding	NA	K13448//calcium-binding protein CML	XP_003542750.1//PREDICTED: probable calcium-binding protein CML29 [Glycine max]
Maker00001675	2.3223	Up	-3.18327	Down	NA	NA	NA	NA	NA	K07199//5'-AMP-activated protein kinase, regulatory beta subunit	XP_020234314.1//SNF1-related protein kinase regulatory subunit beta-2-like isoform X1 [Cajanus cajan];KRH14057.1//hypothetical protein GLYMA_14G004100 [Glycine max]
Maker00010905	-2.34322	Down	NA	NA	NA	NA	NA	GO:0016702//oxidoreductase activity, acting on single donors with incorporation of molecular oxygen, incorporation of two atoms of oxygen;GO:0046872//metal ion binding	NA	K09840//9-cis-epoxycarotenoid dioxygenase [EC:1.13.11.51]	XP_017644952.1//PREDICTED: probable 9-cis-epoxycarotenoid dioxygenase NCED5, chloroplastic [Gossypium arboreum]
Maker00016901	-1.4363	Down	NA	NA	-2.38042	Down	NA	GO:0016757//transferase activity, transferring glycosyl groups;GO:0003824//catalytic activity	NA	K06617//raffinose synthase [EC:2.4.1.82]	KJB14884.1//hypothetical protein B456_002G147800 [Gossypium raimondii];OMO71264.1//Raffinose synthase [Corchorus capsularis]
Maker00008676	1.51683	Up	-2.27799	Down	NA	NA	GO:0046658//anchored component of plasma membrane	GO:0004553//hydrolase activity, hydrolyzing O-glycosyl compounds;GO:0030247//polysaccharide binding	GO:0005975//carbohydrate metabolic process	K19893//glucan endo-1,3-beta-glucosidase 5/6 [EC:3.2.1.39]	XP_003541322.1//PREDICTED: glucan endo-1,3-beta-glucosidase 5-like [Glycine max]
Maker00016959	4.72437	Up	-7.45146	Down	-2.27959	Down	GO:0005576//extracellular region	GO:0045735//nutrient reservoir activity;GO:0030145//manganese ion binding	NA	NA	XP_020227885.1//germin-like protein subfamily 2 member 4 [Cajanus cajan]
Maker00021727	-1.05896	Down	NA	NA	NA	NA	GO:0016021//integral component of membrane;GO:0005789//endoplasmic reticulum membrane	GO:0000155//phosphorelay sensor kinase activity;GO:0051740//ethylene binding;GO:0046872//metal ion binding;GO:0005524//ATP binding;GO:0038199//ethylene receptor activity	GO:0010105//negative regulation of ethylene-activated signaling pathway	K14509//ethylene receptor [EC:2.7.13.-]	XP_019428230.1//PREDICTED: ethylene receptor 2-like [Lupinus angustifolius];XP_020222143.1//ethylene receptor 2-like [Cajanus cajan]
BGI_novel_G000566	-1.27175	Down	2.70748	Up	NA	NA	NA	NA	NA	K19041//E3 ubiquitin-protein ligase RNF38/44 [EC:2.3.2.27]	XP_016188711.1//E3 ubiquitin-protein ligase RING1 [Arachis ipaensis]
BGI_novel_G001630	1.45927	Up	NA	NA	NA	NA	GO:0005887//integral component of plasma membrane	GO:0015179//L-amino acid transmembrane transporter activity;GO:0015297//antiporter activity	NA	K11584//serine/threonine-protein phosphatase 2A regulatory subunit B'	XP_016174221.1//probable polyamine transporter At1g31830 [Arachis ipaensis]
Maker00015001	-2.56499	Down	NA	NA	NA	NA	NA	NA	NA	NA	XP_017417828.1//PREDICTED: protein LITTLE ZIPPER 2 [Vigna angularis]
Maker00016316	2.72132	Up	-2.34427	Down	NA	NA	NA	NA	NA	K13346//peroxin-10	XP_019443171.1//PREDICTED: stress-response A/B barrel domain-containing protein UP3 [Lupinus angustifolius]
Maker00023835	2.33406	Up	-4.44892	Down	NA	NA	NA	GO:0008017//microtubule binding	GO:0007010//cytoskeleton organization	K10352//myosin heavy chain;K22733;K20283//golgin subfamily A member 4;K09291//nucleoprotein TPR;K20478//golgin subfamily B member 1	XP_006597612.1//PREDICTED: microtubule-associated protein 70-5 [Glycine max];XP_020230647.1//microtubule-associated protein 70-5-like [Cajanus cajan]
Maker00003744	2.77345	Up	-3.91866	Down	NA	NA	NA	NA	NA	K14506//jasmonic acid-amino synthetase	XP_020204754.1//uncharacterized protein LOC109790068 [Cajanus cajan]
Maker00013133	2.3369	Up	-3.57536	Down	NA	NA	NA	GO:0046872//metal ion binding	GO:0030001//metal ion transport	K18626//trichohyalin	XP_021897678.1//heavy metal-associated isoprenylated plant protein 3 [Carica papaya];XP_008385370.1//PREDICTED: heavy metal-associated isoprenylated plant protein 3 [Malus domestica]
Maker00021090	1.21344	Up	NA	NA	NA	NA	NA	NA	NA	K15404//aldehyde decarbonylase [EC:4.1.99.5]	XP_019453849.1//PREDICTED: protein ECERIFERUM 3-like isoform X1 [Lupinus angustifolius]
BGI_novel_G002902	-3.46469	Down	NA	NA	-1.81549	Down	GO:0005615//extracellular space;GO:0005576//extracellular region	GO:0004553//hydrolase activity, hydrolyzing O-glycosyl compounds;GO:0008061//chitin binding;GO:0004568//chitinase activity	GO:0006032//chitin catabolic process;GO:0005975//carbohydrate metabolic process;GO:0000272//polysaccharide catabolic process	K01183//chitinase [EC:3.2.1.14]	NP_001316758.1//acidic endochitinase precursor [Vigna angularis]
Maker00012789	3.68869	Up	-5.48298	Down	NA	NA	NA	NA	NA	NA	XP_003539213.1//PREDICTED: fasciclin-like arabinogalactan protein 12 [Glycine max]
Maker00000515	1.14177	Up	NA	NA	NA	NA	GO:0005634//nucleus	GO:0043565//sequence-specific DNA binding	GO:0006355//regulation of transcription, DNA-templated	K16670//homeobox protein Meis2;K15613//homeobox protein Meis1	NP_001253999.1//homeobox protein knotted-1-like 2-like [Glycine max]
Maker00009805	1.56465	Up	-2.71886	Down	NA	NA	NA	NA	NA	NA	XP_020216533.1//VAN3-binding protein isoform X2 [Cajanus cajan];XP_017409230.1//PREDICTED: VAN3-binding protein-like isoform X3 [Vigna angularis];XP_020216532.1//VAN3-binding protein isoform X1 [Cajanus cajan]
Maker00005480	-2.76368	Down	3.15821	Up	NA	NA	NA	NA	NA	NA	XP_007135770.1//hypothetical protein PHAVU_010G157300g [Phaseolus vulgaris]
Maker00023726	1.66808	Up	-2.70593	Down	NA	NA	GO:0005634//nucleus	NA	NA	K14505//cyclin D3, plant	XP_020239440.1//cyclin-D3-1 [Cajanus cajan]
Maker00021205	2.60221	Up	-3.01769	Down	NA	NA	GO:0005618//cell wall;GO:0005773//vacuole	GO:0030246//carbohydrate binding;GO:0004565//beta-galactosidase activity	GO:0005975//carbohydrate metabolic process	K12309//beta-galactosidase [EC:3.2.1.23]	XP_014620886.1//PREDICTED: beta-galactosidase-like [Glycine max]
Maker00016016	1.14837	Up	-2.14529	Down	NA	NA	NA	GO:0005509//calcium ion binding	NA	K13448//calcium-binding protein CML	XP_019450043.1//PREDICTED: probable calcium-binding protein CML22 isoform X2 [Lupinus angustifolius]
Maker00014294	2.92525	Up	-2.79232	Down	NA	NA	GO:0005634//nucleus	GO:0001228//transcriptional activator activity, RNA polymerase II transcription regulatory region sequence-specific DNA binding;GO:0001046//core promoter sequence-specific DNA binding;GO:0046983//protein dimerization activity	GO:0006366//transcription from RNA polymerase II promoter	NA	KHN29208.1//Transcription factor bHLH130 [Glycine soja]
Maker00016279	-1.24513	Down	NA	NA	-1.79499	Down	GO:0005634//nucleus;GO:0022627//cytosolic small ribosomal subunit;GO:0015935//small ribosomal subunit	GO:0003723//RNA binding;GO:0003684//damaged DNA binding;GO:0003735//structural constituent of ribosome;GO:0008534//oxidized purine nucleobase lesion DNA N-glycosylase activity	GO:0006281//DNA repair;GO:0002181//cytoplasmic translation;GO:0006412//translation	K02985//small subunit ribosomal protein S3e	XP_007145342.1//hypothetical protein PHAVU_007G231200g [Phaseolus vulgaris]
Maker00013705	1.28082	Up	-2.08567	Down	NA	NA	GO:0016021//integral component of membrane;GO:0005886//plasma membrane	GO:0004674//protein serine/threonine kinase activity;GO:0005524//ATP binding;GO:0004675//transmembrane receptor protein serine/threonine kinase activity	GO:0006468//protein phosphorylation;GO:0007166//cell surface receptor signaling pathway	K04733//interleukin-1 receptor-associated kinase 4 [EC:2.7.11.1]	XP_002306101.2//hypothetical protein POPTR_0004s16140g [Populus trichocarpa];XP_020227000.1//probable receptor-like serine/threonine-protein kinase At4g34500 [Cajanus cajan]
Maker00018547	2.43002	Up	-3.08262	Down	NA	NA	NA	NA	NA	K00688//glycogen phosphorylase [EC:2.4.1.1]	XP_018505062.1//PREDICTED: alpha-glucan phosphorylase 1-like isoform X2 [Pyrus x bretschneideri]
Maker00000778	1.47475	Up	-2.2209	Down	NA	NA	GO:0016021//integral component of membrane	NA	NA	K04733//interleukin-1 receptor-associated kinase 4 [EC:2.7.11.1]	XP_015881369.1//PREDICTED: cysteine-rich repeat secretory protein 60-like isoform X2 [Ziziphus jujuba]
Maker00011343	1.67622	Up	-3.81724	Down	-2.0601	Down	GO:0005634//nucleus	GO:0046872//metal ion binding;GO:0003677//DNA binding	NA	K20641//Rho GTPase-activating protein 20;K13415//protein brassinosteroid insensitive 1 [EC:2.7.10.1 2.7.11.1]	XP_017441688.1//PREDICTED: squamosa promoter-binding-like protein 8 [Vigna angularis];BAT96772.1//hypothetical protein VIGAN_09006800 [Vigna angularis var. angularis]
BGI_novel_G000339	-1.57402	Down	3.38455	Up	1.70644	Up	NA	NA	NA	K04733//interleukin-1 receptor-associated kinase 4 [EC:2.7.11.1]	XP_020204879.1//lectin-domain containing receptor kinase VI.3-like [Cajanus cajan]
Maker00018455	1.81896	Up	NA	NA	NA	NA	GO:0016021//integral component of membrane	GO:0005524//ATP binding	NA	K08900//mitochondrial chaperone BCS1	XP_015945996.1//AAA-ATPase ASD, mitochondrial [Arachis duranensis]
Maker00004548	1.39408	Up	-3.04331	Down	NA	NA	NA	GO:0005509//calcium ion binding	NA	K13448//calcium-binding protein CML	XP_012079101.1//probable calcium-binding protein CML41 [Jatropha curcas]
BGI_novel_G000414	-2.16779	Down	NA	NA	-3.83252	Down	NA	NA	NA	K05747//Wiskott-Aldrich syndrome protein;K20547//basic endochitinase B [EC:3.2.1.14]	XP_002964164.1//hypothetical protein SELMODRAFT_438863 [Selaginella moellendorffii]
Maker00024286	-1.09296	Down	NA	NA	-1.41602	Down	GO:0005622//intracellular;GO:0016021//integral component of membrane	GO:0000155//phosphorelay sensor kinase activity	NA	K14509//ethylene receptor [EC:2.7.13.-]	XP_004494397.1//PREDICTED: ethylene response sensor 1 [Cicer arietinum]
Maker00011879	2.51053	Up	-1.48366	Down	NA	NA	GO:0005874//microtubule;GO:0005737//cytoplasm	GO:0005200//structural constituent of cytoskeleton;GO:0005525//GTP binding;GO:0003924//GTPase activity	GO:0007017//microtubule-based process	K07374//tubulin alpha	XP_020240914.1//tubulin alpha chain-like [Asparagus officinalis];KXG37667.1//hypothetical protein SORBI_3001G107100 [Sorghum bicolor]
Maker00008248	1.96958	Up	NA	NA	NA	NA	GO:0016021//integral component of membrane	GO:0008289//lipid binding	GO:0006869//lipid transport	NA	XP_020236255.1//non-specific lipid-transfer protein 3-like [Cajanus cajan]
Maker00012808	1.13286	Up	NA	NA	NA	NA	NA	GO:0008441//3'(2'),5'-bisphosphate nucleotidase activity	GO:0006790//sulfur compound metabolic process;GO:0046854//phosphatidylinositol phosphorylation	K01082//3'(2'), 5'-bisphosphate nucleotidase [EC:3.1.3.7]	XP_019451065.1//PREDICTED: PAP-specific phosphatase HAL2-like [Lupinus angustifolius]
Maker00020016	-1.02262	Down	NA	NA	NA	NA	NA	NA	NA	K03029//26S proteasome regulatory subunit N10	XP_019416985.1//PREDICTED: uncharacterized protein LOC109328136 [Lupinus angustifolius]
Maker00002476	2.58123	Up	-4.56196	Down	-1.99106	Down	GO:0048046//apoplast	GO:0016722//oxidoreductase activity, oxidizing metal ions;GO:0052716//hydroquinone:oxygen oxidoreductase activity;GO:0005507//copper ion binding	GO:0046274//lignin catabolic process	K05909//laccase [EC:1.10.3.2]	XP_019462637.1//PREDICTED: laccase-4-like [Lupinus angustifolius]
Maker00009948	-1.44307	Down	-2.89795	Down	-4.38483	Down	GO:0046658//anchored component of plasma membrane	GO:0009055//electron transfer activity	NA	K03006//DNA-directed RNA polymerase II subunit RPB1 [EC:2.7.7.6];K01426//amidase [EC:3.5.1.4]	KHN44270.1//Basic blue protein [Glycine soja]
Maker00000262	1.91496	Up	-3.90171	Down	NA	NA	GO:0016021//integral component of membrane	GO:0016614//oxidoreductase activity, acting on CH-OH group of donors;GO:0019139//cytokinin dehydrogenase activity;GO:0050660//flavin adenine dinucleotide binding	GO:0009690//cytokinin metabolic process	K00279//cytokinin dehydrogenase [EC:1.5.99.12]	XP_014498415.1//PREDICTED: cytokinin dehydrogenase 5 [Vigna radiata var. radiata];CBI19763.3//unnamed protein product, partial [Vitis vinifera]
Maker00024742	2.0631	Up	-3.33537	Down	NA	NA	GO:0016021//integral component of membrane	GO:0005524//ATP binding;GO:0016887//ATPase activity	NA	K05681//ATP-binding cassette, subfamily G (WHITE), member 2	XP_014512637.1//PREDICTED: ABC transporter G family member 6-like [Vigna radiata var. radiata]
Maker00007482	1.48708	Up	-1.11179	Down	NA	NA	GO:0016021//integral component of membrane	NA	NA	NA	XP_019452339.1//PREDICTED: uncharacterized protein LOC109354352 [Lupinus angustifolius]
BGI_novel_G001748	-1.142	Down	NA	NA	NA	NA	NA	GO:0046872//metal ion binding	NA	K15687//E3 ubiquitin-protein ligase makorin [EC:2.3.2.27]	XP_020208146.1//putative RING-type E3 ubiquitin transferase C3H69 [Cajanus cajan]
Maker00005149	-1.07285	Down	1.62131	Up	NA	NA	GO:0005634//nucleus	NA	GO:0006355//regulation of transcription, DNA-templated;GO:0009734//auxin-activated signaling pathway;GO:0006351//transcription, DNA-templated	K14484//auxin-responsive protein IAA	XP_017425507.1//PREDICTED: auxin-responsive protein IAA26-like [Vigna angularis]
Maker00022556	2.56491	Up	-4.9399	Down	NA	NA	NA	GO:0008810//cellulase activity	GO:0030245//cellulose catabolic process	K01179//endoglucanase [EC:3.2.1.4]	PAN25140.1//hypothetical protein PAHAL_D02770 [Panicum hallii];XP_021910006.1//endoglucanase 8 [Carica papaya]
Maker00009604	1.51775	Up	-4.07916	Down	-2.54285	Down	GO:0005634//nucleus	NA	GO:0006355//regulation of transcription, DNA-templated;GO:0009734//auxin-activated signaling pathway;GO:0006351//transcription, DNA-templated	K14484//auxin-responsive protein IAA	XP_020236108.1//auxin-responsive protein IAA9-like [Cajanus cajan]
BGI_novel_G001418	-5.39265	Down	NA	NA	-6.36583	Down	NA	NA	NA	K20547//basic endochitinase B [EC:3.2.1.14]	ASL69226.1//basic chitinase 1 [Diospyros kaki]
Maker00003378	2.67536	Up	NA	NA	NA	NA	NA	NA	NA	NA	XP_018850819.1//PREDICTED: uncharacterized protein LOC109013247 [Juglans regia]
BGI_novel_G002247	1.5304	Up	-2.09708	Down	NA	NA	GO:0016021//integral component of membrane	NA	NA	NA	KYP49655.1//hypothetical protein KK1_028627 [Cajanus cajan]
Maker00004142	2.19273	Up	-1.78328	Down	NA	NA	GO:0005634//nucleus	GO:0003677//DNA binding	GO:0006355//regulation of transcription, DNA-templated;GO:0006351//transcription, DNA-templated	K12741//heterogeneous nuclear ribonucleoprotein A1/A3;K06236//collagen, type I, alpha;K14491//two-component response regulator ARR-B family	XP_017424137.1//PREDICTED: myb-related protein 2-like [Vigna angularis]
BGI_novel_G000222	-2.25031	Down	NA	NA	NA	NA	NA	NA	NA	K04733//interleukin-1 receptor-associated kinase 4 [EC:2.7.11.1]	AJW67289.1//thaumatin-like protein [Pinus massoniana]
Maker00007686	2.45516	Up	-3.11592	Down	NA	NA	NA	GO:0008429//phosphatidylethanolamine binding	GO:0009909//regulation of flower development;GO:0048573//photoperiodism, flowering	K16223//protein FLOWERING LOCUS T	XP_019193813.1//PREDICTED: protein HEADING DATE 3A-like [Ipomoea nil]
Maker00009883	1.56906	Up	-1.73773	Down	NA	NA	NA	NA	NA	K05747//Wiskott-Aldrich syndrome protein;K15095//(+)-neomenthol dehydrogenase [EC:1.1.1.208];K03626//nascent polypeptide-associated complex subunit alpha	XP_004502768.1//PREDICTED: uncharacterized protein LOC101489318 [Cicer arietinum]
BGI_novel_G002053	1.66033	Up	NA	NA	1.14703	Up	GO:0048046//apoplast;GO:0005618//cell wall;GO:0016021//integral component of membrane	GO:0016762//xyloglucan:xyloglucosyl transferase activity;GO:0004553//hydrolase activity, hydrolyzing O-glycosyl compounds	GO:0010411//xyloglucan metabolic process;GO:0042546//cell wall biogenesis;GO:0071555//cell wall organization	K08235//xyloglucan:xyloglucosyl transferase [EC:2.4.1.207]	XP_019434302.1//PREDICTED: xyloglucan endotransglucosylase/hydrolase 2 [Lupinus angustifolius]
Maker00001677	-1.70944	Down	4.45207	Up	2.68624	Up	GO:0005737//cytoplasm	GO:0004364//glutathione transferase activity	GO:0006749//glutathione metabolic process	K00799//glutathione S-transferase [EC:2.5.1.18]	XP_016167308.1//glutathione S-transferase F9 [Arachis ipaensis]
Maker00006584	1.81476	Up	NA	NA	NA	NA	NA	GO:0003713//transcription coactivator activity	NA	NA	XP_014512341.1//PREDICTED: GRF1-interacting factor 1-like [Vigna radiata var. radiata];XP_018832751.1//PREDICTED: GRF1-interacting factor 1-like [Juglans regia]
Maker00003947	-1.88845	Down	-2.19933	Down	-4.28815	Down	NA	GO:0008236//serine-type peptidase activity;GO:0008239//dipeptidyl-peptidase activity	GO:0006508//proteolysis	K01285//lysosomal Pro-X carboxypeptidase [EC:3.4.16.2]	KYP51817.1//Lysosomal Pro-X carboxypeptidase [Cajanus cajan]
Maker00010045	1.12598	Up	NA	NA	1.4832	Up	NA	NA	NA	K10614;K10615//E3 ubiquitin-protein ligase HERC4 [EC:2.3.2.26]	XP_003538429.1//PREDICTED: ultraviolet-B receptor UVR8-like isoform X1 [Glycine max];KNA17514.1//hypothetical protein SOVF_079260 isoform B [Spinacia oleracea]
Maker00014120	1.88229	Up	NA	NA	NA	NA	GO:0046658//anchored component of plasma membrane	GO:0004553//hydrolase activity, hydrolyzing O-glycosyl compounds;GO:0030247//polysaccharide binding	NA	K03006//DNA-directed RNA polymerase II subunit RPB1 [EC:2.7.7.6];K22832	KHN21377.1//Glucan endo-1,3-beta-glucosidase 4 [Glycine soja]
Maker00021417	-1.00606	Down	1.93725	Up	NA	NA	GO:0005737//cytoplasm	GO:0003824//catalytic activity;GO:0016791//phosphatase activity	GO:0005992//trehalose biosynthetic process;GO:0070413//trehalose metabolism in response to stress	K16055//trehalose 6-phosphate synthase/phosphatase [EC:2.4.1.15 3.1.3.12]	XP_015933477.1//probable alpha,alpha-trehalose-phosphate synthase [UDP-forming] 11 [Arachis duranensis]
Maker00000557	1.68661	Up	NA	NA	NA	NA	NA	GO:0016787//hydrolase activity	NA	K13051//beta-aspartyl-peptidase (threonine type) [EC:3.4.19.5]	NP_001236606.2//L-asparaginase [Glycine max]
BGI_novel_G002905	-4.46201	Down	4.9388	Up	NA	NA	GO:0005615//extracellular space;GO:0005576//extracellular region	GO:0004553//hydrolase activity, hydrolyzing O-glycosyl compounds;GO:0008061//chitin binding;GO:0004568//chitinase activity	GO:0006032//chitin catabolic process;GO:0005975//carbohydrate metabolic process;GO:0000272//polysaccharide catabolic process	K01183//chitinase [EC:3.2.1.14]	NP_001316758.1//acidic endochitinase precursor [Vigna angularis]
Maker00003484	1.91437	Up	-4.49763	Down	NA	NA	NA	GO:0008017//microtubule binding	GO:0000226//microtubule cytoskeleton organization;GO:0000910//cytokinesis	K16732//protein regulator of cytokinesis 1	XP_014626723.1//PREDICTED: 65-kDa microtubule-associated protein 8-like isoform X1 [Glycine max]
Maker00020828	-1.36222	Down	1.13294	Up	NA	NA	NA	GO:0008131//primary amine oxidase activity;GO:0005507//copper ion binding;GO:0048038//quinone binding	GO:0009308//amine metabolic process	K00276//primary-amine oxidase [EC:1.4.3.21]	XP_003519633.1//PREDICTED: copper methylamine oxidase [Glycine max];KYP49362.1//Primary amine oxidase [Cajanus cajan]
BGI_novel_G001891	-1.26586	Down	NA	NA	NA	NA	GO:0016020//membrane;GO:0016021//integral component of membrane	GO:0016709//oxidoreductase activity, acting on paired donors, with incorporation or reduction of molecular oxygen, NAD(P)H as one donor, and incorporation of one atom of oxygen;GO:0016705//oxidoreductase activity, acting on paired donors, with incorporation or reduction of molecular oxygen;GO:0020037//heme binding;GO:0005506//iron ion binding;GO:0004497//monooxygenase activity	GO:0044550//secondary metabolite biosynthetic process	K20623//typhasterol/6-deoxotyphasterol 2alpha-hydroxylase	XP_017440931.1//PREDICTED: cytochrome P450 71A1-like [Vigna angularis]
Maker00022505	1.72428	Up	NA	NA	1.89853	Up	GO:0005887//integral component of plasma membrane;GO:0016021//integral component of membrane	GO:0015116//sulfate transmembrane transporter activity;GO:0008271//secondary active sulfate transmembrane transporter activity	NA	K17471//sulfate transporter 3	KHN08075.1//Putative sulfate transporter 3.3 [Glycine soja];XP_020996054.1//probable sulfate transporter 3.3 isoform X2 [Arachis duranensis];XP_003556073.1//PREDICTED: probable sulfate transporter 3.3 isoform X1 [Glycine max]
Maker00000908	1.37123	Up	-3.18116	Down	-1.80269	Down	GO:0005874//microtubule;GO:0005819//spindle	NA	GO:0060236//regulation of mitotic spindle organization;GO:0032147//activation of protein kinase activity	K16812//targeting protein for Xklp2	XP_004503103.1//PREDICTED: uncharacterized protein LOC101493967 [Cicer arietinum];XP_019439083.1//PREDICTED: uncharacterized protein LOC109344791 [Lupinus angustifolius]
Maker00009922	1.47926	Up	-2.58577	Down	-1.04184	Down	GO:0016021//integral component of membrane	GO:0016491//oxidoreductase activity	GO:0006629//lipid metabolic process	K21737//acyl-lipid Delta6-acetylenase / acyl-lipid (9-3)-desaturase [EC:1.14.19.38 1.14.19.47]	XP_007012291.1//PREDICTED: acyl-lipid (9-3)-desaturase [Theobroma cacao]
Maker00009893	1.09186	Up	NA	NA	NA	NA	GO:0005829//cytosol	NA	GO:0009904//chloroplast accumulation movement;GO:0009903//chloroplast avoidance movement	NA	XP_020214795.1//WEB family protein At2g40480-like [Cajanus cajan]
Maker00012440	1.15459	Up	NA	NA	1.96213	Up	GO:0016021//integral component of membrane	GO:0030246//carbohydrate binding;GO:0004674//protein serine/threonine kinase activity;GO:0005524//ATP binding	GO:0048544//recognition of pollen	K04733//interleukin-1 receptor-associated kinase 4 [EC:2.7.11.1]	OMP10605.1//S-locus glycoprotein [Corchorus olitorius];XP_004487351.1//PREDICTED: G-type lectin S-receptor-like serine/threonine-protein kinase At2g19130 [Cicer arietinum]
Maker00004066	1.07987	Up	NA	NA	NA	NA	GO:0005634//nucleus;GO:0005886//plasma membrane;GO:0005737//cytoplasm	GO:0000155//phosphorelay sensor kinase activity;GO:0004674//protein serine/threonine kinase activity;GO:0005524//ATP binding	GO:0035556//intracellular signal transduction	K20715//phototropin [EC:2.7.11.1]	AML79574.1//putative LOV domain-containing protein [Acacia argyrophylla];AML78240.1//putative LOV domain-containing protein [Acacia pycnantha]
Maker00019100	1.2437	Up	-2.59123	Down	-1.26413	Down	NA	NA	NA	K19613//leucine-rich repeat protein SHOC2	XP_016187660.1//plant intracellular Ras-group-related LRR protein 9 [Arachis ipaensis]
Maker00003615	3.45535	Up	-4.01249	Down	NA	NA	NA	NA	NA	NA	XP_017424459.1//PREDICTED: stress-response A/B barrel domain-containing protein At5g22580 [Vigna angularis]
Maker00020924	2.22851	Up	-3.56983	Down	NA	NA	GO:0005737//cytoplasm	GO:0047134//protein-disulfide reductase activity;GO:0015035//protein disulfide oxidoreductase activity;GO:0016671//oxidoreductase activity, acting on a sulfur group of donors, disulfide as acceptor;GO:0004791//thioredoxin-disulfide reductase activity	GO:0006662//glycerol ether metabolic process;GO:0034599//cellular response to oxidative stress;GO:0045454//cell redox homeostasis	K03671//thioredoxin 1	XP_015956872.1//thioredoxin H2 [Arachis duranensis]
Maker00006351	3.83229	Up	-5.41431	Down	NA	NA	GO:0016021//integral component of membrane	NA	NA	NA	XP_003625182.1//transmembrane protein, putative [Medicago truncatula]
Maker00009736	1.30388	Up	NA	NA	NA	NA	GO:0005887//integral component of plasma membrane;GO:0016021//integral component of membrane	GO:0005249//voltage-gated potassium channel activity	GO:0042391//regulation of membrane potential	K21867//potassium channel	XP_006579054.1//PREDICTED: potassium channel AKT1-like [Glycine max];XP_003526425.1//PREDICTED: potassium channel AKT1-like [Glycine max]
Maker00004482	2.0549	Up	-4.68932	Down	NA	NA	GO:0005634//nucleus	GO:0003677//DNA binding	NA	K22390;K15397//3-ketoacyl-CoA synthase [EC:2.3.1.199]	KHN00535.1//hypothetical protein glysoja_000203 [Glycine soja]
Maker00001538	-1.32823	Down	NA	NA	-1.48671	Down	NA	NA	NA	NA	XP_015887599.1//PREDICTED: uncharacterized protein LOC107422638 [Ziziphus jujuba];XP_011027643.1//PREDICTED: uncharacterized protein LOC105127877 [Populus euphratica]
Maker00011859	1.76015	Up	-2.11426	Down	NA	NA	GO:0016021//integral component of membrane	GO:0005355//glucose transmembrane transporter activity;GO:0005351//sugar:proton symporter activity	GO:0008643//carbohydrate transport;GO:0035428//hexose transmembrane transport;GO:0046323//glucose import	K08145//MFS transporter, SP family, solute carrier family 2 (facilitated glucose transporter), member 8	XP_020229565.1//sugar transporter ERD6-like 6 [Cajanus cajan]
BGI_novel_G003216	1.48138	Up	-1.52723	Down	NA	NA	GO:0005737//cytoplasm	GO:0005525//GTP binding;GO:0008017//microtubule binding;GO:0003924//GTPase activity	GO:0000266//mitochondrial fission	K14754//interferon-induced GTP-binding protein Mx1	XP_003629867.1//dynamin 4C-like protein [Medicago truncatula]
Maker00023421	1.13476	Up	-1.59181	Down	NA	NA	GO:0016021//integral component of membrane	GO:0016747//transferase activity, transferring acyl groups other than amino-acyl groups	GO:0006633//fatty acid biosynthetic process	K15397//3-ketoacyl-CoA synthase [EC:2.3.1.199]	XP_019074547.1//PREDICTED: 3-ketoacyl-CoA synthase 4 isoform X2 [Vitis vinifera];XP_010028602.1//PREDICTED: 3-ketoacyl-CoA synthase 4 [Eucalyptus grandis];KDO49072.1//hypothetical protein CISIN_1g010687mg [Citrus sinensis]
Maker00004424	-1.02575	Down	NA	NA	NA	NA	GO:0005634//nucleus	GO:0043565//sequence-specific DNA binding;GO:0003700//DNA binding transcription factor activity	NA	K09419//heat shock transcription factor, other eukaryote	XP_021633190.1//heat shock factor protein HSF24-like [Manihot esculenta]
Maker00019354	2.25774	Up	-7.04126	Down	-4.15454	Down	NA	NA	NA	K11855//ubiquitin carboxyl-terminal hydrolase 36/42 [EC:3.4.19.12]	XP_011100461.2//LOW QUALITY PROTEIN: 36.4 kDa proline-rich protein-like [Sesamum indicum]
Maker00012275	1.83609	Up	NA	NA	2.71784	Up	GO:0016021//integral component of membrane	GO:0005215//transporter activity	NA	K14638//solute carrier family 15 (peptide/histidine transporter), member 3/4	XP_020227483.1//protein NRT1/ PTR FAMILY 7.3-like [Cajanus cajan]
Maker00010115	2.368	Up	-4.63025	Down	-2.14801	Down	GO:0048046//apoplast	GO:0052716//hydroquinone:oxygen oxidoreductase activity;GO:0005507//copper ion binding	GO:0046274//lignin catabolic process	K05909//laccase [EC:1.10.3.2]	KRG97675.1//hypothetical protein GLYMA_18G023600 [Glycine max];XP_020208524.1//laccase-5-like [Cajanus cajan]
Maker00018275	1.85157	Up	-6.08365	Down	-3.59921	Down	GO:0016021//integral component of membrane	NA	NA	K13680//beta-mannan synthase [EC:2.4.1.32]	XP_020211902.1//glucomannan 4-beta-mannosyltransferase 9-like [Cajanus cajan]
Maker00008791	1.74627	Up	-3.62336	Down	NA	NA	NA	NA	NA	K20241//WD repeat-containing protein 44	XP_020215492.1//WD repeat-containing protein 44-like [Cajanus cajan];XP_006581755.1//PREDICTED: WD repeat-containing protein YMR102C-like [Glycine max]
Maker00006810	1.29854	Up	NA	NA	NA	NA	GO:0005622//intracellular	GO:0005524//ATP binding;GO:0004672//protein kinase activity;GO:0004871//signal transducer activity	GO:0006468//protein phosphorylation;GO:0035556//intracellular signal transduction	K17535//serine/threonine-protein kinase TNNI3K [EC:2.7.11.1];K01968//3-methylcrotonyl-CoA carboxylase alpha subunit [EC:6.4.1.4]	BAU01043.1//hypothetical protein VIGAN_11019700 [Vigna angularis var. angularis];EOY02366.1//Kinase superfamily protein isoform 2 [Theobroma cacao];XP_007031441.2//PREDICTED: serine/threonine-protein kinase HT1 isoform X1 [Theobroma cacao]
BGI_novel_G000330	1.61231	Up	1.50171	Up	3.08895	Up	NA	GO:0008289//lipid binding	GO:0090378//seed trichome elongation;GO:0006869//lipid transport	NA	AAF35186.1//lipid transfer protein precursor [Gossypium hirsutum]
Maker00008531	1.17574	Up	NA	NA	NA	NA	NA	GO:0020037//heme binding;GO:0004601//peroxidase activity;GO:0051213//dioxygenase activity	GO:0006979//response to oxidative stress	K10529//alpha-dioxygenase [EC:1.-.-.-]	XP_020215718.1//alpha-dioxygenase 2 [Cajanus cajan];XP_015866956.1//PREDICTED: alpha-dioxygenase 2-like [Ziziphus jujuba]
Maker00022539	1.98573	Up	-2.79222	Down	NA	NA	NA	GO:0004185//serine-type carboxypeptidase activity	GO:0051603//proteolysis involved in cellular protein catabolic process	K16297//serine carboxypeptidase-like clade II [EC:3.4.16.-]	XP_019413360.1//PREDICTED: serine carboxypeptidase-like 35 [Lupinus angustifolius];XP_021811396.1//serine carboxypeptidase-like 35 [Prunus avium]
Maker00011049	-1.81179	Down	NA	NA	-2.26745	Down	GO:0016021//integral component of membrane	GO:0005215//transporter activity	GO:0006857//oligopeptide transport	K14638//solute carrier family 15 (peptide/histidine transporter), member 3/4	XP_012066760.1//protein NRT1/ PTR FAMILY 4.3 [Jatropha curcas]
BGI_novel_G000152	-1.04774	Down	NA	NA	NA	NA	GO:0016021//integral component of membrane	NA	NA	K13466//EIX receptor 1/2;K03021//DNA-directed RNA polymerase III subunit RPC2 [EC:2.7.7.6]	KHN29479.1//Receptor-like protein 12 [Glycine soja]
Maker00020416	2.47679	Up	-5.18757	Down	NA	NA	GO:0016021//integral component of membrane	NA	NA	K12121//phytochrome B	KYP66412.1//Glycine-rich cell wall structural protein 1.8 [Cajanus cajan];XP_020216808.1//glycine-rich cell wall structural protein 1.8-like [Cajanus cajan]
Maker00004120	1.91953	Up	-2.05717	Down	NA	NA	GO:0048046//apoplast;GO:0005618//cell wall	GO:0016762//xyloglucan:xyloglucosyl transferase activity;GO:0004553//hydrolase activity, hydrolyzing O-glycosyl compounds	GO:0010411//xyloglucan metabolic process;GO:0042546//cell wall biogenesis;GO:0071555//cell wall organization	K08235//xyloglucan:xyloglucosyl transferase [EC:2.4.1.207]	XP_015936123.1//xyloglucan endotransglucosylase/hydrolase protein 9 [Arachis duranensis];AFK36629.1//unknown [Lotus japonicus]
Maker00020849	1.11086	Up	-1.71785	Down	NA	NA	GO:0016021//integral component of membrane	GO:0016780//phosphotransferase activity, for other substituted phosphate groups	GO:0008654//phospholipid biosynthetic process	K00993//ethanolaminephosphotransferase [EC:2.7.8.1]	XP_007153539.1//hypothetical protein PHAVU_003G044000g [Phaseolus vulgaris];XP_003518818.1//PREDICTED: choline/ethanolaminephosphotransferase 1-like [Glycine max]
Maker00013952	1.98622	Up	-1.69462	Down	NA	NA	NA	GO:0008810//cellulase activity	GO:0030245//cellulose catabolic process	K01179//endoglucanase [EC:3.2.1.4]	XP_019451001.1//PREDICTED: endoglucanase 24-like [Lupinus angustifolius];ONK58822.1//uncharacterized protein A4U43_C08F100 [Asparagus officinalis]
Maker00014553	2.03835	Up	-3.28717	Down	NA	NA	GO:0005634//nucleus	NA	NA	K22377;K03539//ribonuclease P/MRP protein subunit RPP1 [EC:3.1.26.5]	XP_020230942.1//uncharacterized protein LOC109811572 [Cajanus cajan]
Maker00021743	-2.60552	Down	NA	NA	-2.69471	Down	NA	NA	NA	NA	KRH00586.1//hypothetical protein GLYMA_18G2218002 [Glycine max];XP_007139987.1//hypothetical protein PHAVU_008G075300g [Phaseolus vulgaris]
Maker00008353	1.2408	Up	-2.2142	Down	NA	NA	GO:0005576//extracellular region	GO:0005507//copper ion binding;GO:0016491//oxidoreductase activity	NA	K00423//L-ascorbate oxidase [EC:1.10.3.3]	XP_007146090.1//hypothetical protein PHAVU_006G011700g [Phaseolus vulgaris];XP_007146089.1//hypothetical protein PHAVU_006G011600g [Phaseolus vulgaris]
Maker00005095	1.80947	Up	-2.42293	Down	NA	NA	GO:0016021//integral component of membrane	GO:0008168//methyltransferase activity	NA	K12175//COP9 signalosome complex subunit 1;K15449//tRNA wybutosine-synthesizing protein 1 [EC:4.1.3.44]	XP_019461408.1//PREDICTED: probable methyltransferase PMT15 isoform X1 [Lupinus angustifolius]
Maker00024582	-1.17798	Down	NA	NA	-1.81709	Down	NA	NA	NA	NA	XP_006384178.1//hypothetical protein POPTR_0004s09260g, partial [Populus trichocarpa]
Maker00019742	2.69213	Up	-2.75544	Down	NA	NA	GO:0016021//integral component of membrane	GO:0005524//ATP binding;GO:0004672//protein kinase activity	NA	K20718//LRR receptor-like serine/threonine-protein kinase ERECTA [EC:2.7.11.1];K13420//LRR receptor-like serine/threonine-protein kinase FLS2 [EC:2.7.11.1]	XP_006598006.1//PREDICTED: probable inactive leucine-rich repeat receptor-like protein kinase At3g03770 [Glycine max]
Maker00020207	1.39734	Up	-2.26157	Down	NA	NA	GO:0016021//integral component of membrane;GO:0046658//anchored component of plasma membrane	GO:0009055//electron transfer activity	NA	K03006//DNA-directed RNA polymerase II subunit RPB1 [EC:2.7.7.6]	XP_003546178.1//PREDICTED: cucumber peeling cupredoxin-like [Glycine max]
Maker00024150	1.49059	Up	NA	NA	2.76337	Up	GO:0009505//plant-type cell wall	GO:0052692//raffinose alpha-galactosidase activity	GO:0005975//carbohydrate metabolic process	K07407//alpha-galactosidase [EC:3.2.1.22]	XP_020210010.1//alpha-galactosidase 1-like [Cajanus cajan]
Maker00001824	2.28647	Up	-4.02059	Down	NA	NA	NA	GO:0005199//structural constituent of cell wall	NA	K21952//CASK-interacting protein	XP_007216673.1//36.4 kDa proline-rich protein isoform X1 [Prunus persica]
Maker00013785	1.37172	Up	NA	NA	NA	NA	NA	GO:0004842//ubiquitin-protein transferase activity	NA	K04733//interleukin-1 receptor-associated kinase 4 [EC:2.7.11.1];K08332//vacuolar protein 8	KOM52059.1//hypothetical protein LR48_Vigan09g071800 [Vigna angularis]
Maker00005905	1.23522	Up	-1.78559	Down	NA	NA	NA	NA	NA	K15283//solute carrier family 35, member E1	XP_022018783.1//uncharacterized protein LOC110918805 [Helianthus annuus]
Maker00008533	1.91444	Up	NA	NA	NA	NA	NA	GO:0005524//ATP binding;GO:0004672//protein kinase activity	NA	K17535//serine/threonine-protein kinase TNNI3K [EC:2.7.11.1];K04365//B-Raf proto-oncogene serine/threonine-protein kinase [EC:2.7.11.1]	XP_017973833.1//PREDICTED: serine/threonine-protein kinase HT1 [Theobroma cacao];XP_020537419.1//serine/threonine-protein kinase HT1 isoform X2 [Jatropha curcas]
BGI_novel_G000476	2.93239	Up	-4.55984	Down	NA	NA	NA	GO:0004866//endopeptidase inhibitor activity	NA	NA	AFG28551.1//Kunitz trypsin inhibitor, partial [Inga laurina]
Maker00002498	1.54176	Up	-2.96621	Down	NA	NA	GO:0005634//nucleus	GO:0003677//DNA binding	GO:0006355//regulation of transcription, DNA-templated;GO:0006351//transcription, DNA-templated	K08869//aarF domain-containing kinase;K12133//MYB-related transcription factor LHY;K17613//calcineurin-binding protein cabin-1	XP_020207049.1//transcription factor DIVARICATA-like [Cajanus cajan]
Maker00003568	1.09773	Up	NA	NA	NA	NA	GO:0005634//nucleus	GO:0003677//DNA binding	GO:0006355//regulation of transcription, DNA-templated	K04733//interleukin-1 receptor-associated kinase 4 [EC:2.7.11.1];K20043//clathrin coat assembly protein AP180;K09326//homeobox protein OTX1;K16222//Dof zinc finger protein DOF5.5	XP_020214603.1//dof zinc finger protein DOF2.1-like [Cajanus cajan]
Maker00021264	2.98663	Up	NA	NA	NA	NA	NA	NA	NA	NA	KHN14131.1//hypothetical protein glysoja_048433 [Glycine soja]
Maker00013548	3.18063	Up	-5.63617	Down	NA	NA	GO:0016021//integral component of membrane	NA	NA	K13946//auxin influx carrier (AUX1 LAX family)	NP_001340844.1//auxin influx carrier LAX10 [Glycine max]
Maker00023459	3.47604	Up	-4.93118	Down	-1.29262	Down	GO:0005794//Golgi apparatus;GO:0016021//integral component of membrane;GO:0005886//plasma membrane	GO:0016760//cellulose synthase (UDP-forming) activity;GO:0046872//metal ion binding;GO:0016759//cellulose synthase activity	GO:0009833//plant-type primary cell wall biogenesis;GO:0030244//cellulose biosynthetic process;GO:0071555//cell wall organization	K10999//cellulose synthase A [EC:2.4.1.12]	XP_006578126.1//PREDICTED: cellulose synthase A catalytic subunit 8 [UDP-forming]-like [Glycine max]
BGI_novel_G002189	-1.88202	Down	NA	NA	-4.11445	Down	NA	NA	NA	NA	XP_019422834.1//PREDICTED: metacaspase-3-like isoform X1 [Lupinus angustifolius]
BGI_novel_G000316	1.24814	Up	-2.45915	Down	NA	NA	GO:0016021//integral component of membrane	NA	NA	K13993//HSP20 family protein	XP_020213787.1//inactive protein RESTRICTED TEV MOVEMENT 2-like [Cajanus cajan]
Maker00020146	1.19623	Up	NA	NA	NA	NA	GO:0005783//endoplasmic reticulum;GO:0016021//integral component of membrane	GO:0005506//iron ion binding;GO:0080132//fatty acid alpha-hydroxylase activity;GO:0016491//oxidoreductase activity	GO:0006631//fatty acid metabolic process;GO:0008610//lipid biosynthetic process	K19706//dihydroceramide fatty acyl 2-hydroxylase [EC:1.14.18.7]	KHN14310.1//Fatty acid 2-hydroxylase [Glycine soja];BAT87701.1//hypothetical protein VIGAN_05109700 [Vigna angularis var. angularis];XP_002523169.1//PREDICTED: dihydroceramide fatty acyl 2-hydroxylase FAH1 [Ricinus communis];XP_017436743.1//PREDICTED: dihydroceramide fatty acyl 2-hydroxylase FAH1-like [Vigna angularis]
Maker00013593	1.58727	Up	NA	NA	1.76028	Up	GO:0016021//integral component of membrane	GO:0005215//transporter activity	GO:0055085//transmembrane transport	NA	XP_003555206.1//PREDICTED: hippocampus abundant transcript-like protein 1 [Glycine max]
Maker00015203	3.6433	Up	-3.40661	Down	NA	NA	GO:0016021//integral component of membrane	GO:0016705//oxidoreductase activity, acting on paired donors, with incorporation or reduction of molecular oxygen;GO:0020037//heme binding;GO:0005506//iron ion binding;GO:0004497//monooxygenase activity	NA	K20619//cytochrome P450 family 78 subfamily A	XP_021612271.1//cytochrome P450 78A9 [Manihot esculenta]
Maker00003084	-1.11375	Down	NA	NA	-1.21365	Down	GO:0005730//nucleolus	GO:0003729//mRNA binding	GO:0006417//regulation of translation	K14844//pumilio homology domain family member 6	XP_016197725.1//pumilio homolog 24 [Arachis ipaensis]
Maker00002367	2.18457	Up	-3.03463	Down	NA	NA	GO:0005794//Golgi apparatus;GO:0016021//integral component of membrane	GO:0016413//O-acetyltransferase activity	GO:0071554//cell wall organization or biogenesis	NA	XP_014515856.1//PREDICTED: protein trichome birefringence-like 3 [Vigna radiata var. radiata]
Maker00000991	1.71625	Up	-4.2171	Down	-2.27687	Down	GO:0016021//integral component of membrane	NA	NA	K15082//DNA repair protein RAD7	XP_015945558.1//uncharacterized protein LOC107470667 [Arachis duranensis]
Maker00001810	1.70194	Up	-4.55699	Down	-2.81834	Down	GO:0016021//integral component of membrane	NA	GO:0055114//oxidation-reduction process	K01180//endo-1,3(4)-beta-glucanase [EC:3.2.1.6];K02184//formin 2	XP_015972947.1//cytochrome b561 and DOMON domain-containing protein At2g04850 [Arachis duranensis]
Maker00009637	3.22995	Up	-5.11073	Down	NA	NA	GO:0005737//cytoplasm	GO:0016787//hydrolase activity;GO:0008474//palmitoyl-(protein) hydrolase activity;GO:0052689//carboxylic ester hydrolase activity	GO:0002084//protein depalmitoylation	K06130//lysophospholipase II [EC:3.1.1.5]	XP_020213909.1//acyl-protein thioesterase 2-like [Cajanus cajan];KOM41962.1//hypothetical protein LR48_Vigan04g216000 [Vigna angularis]
Maker00014143	-1.51914	Down	2.39015	Up	NA	NA	NA	NA	NA	NA	XP_020213665.1//UPF0481 protein At3g47200 [Cajanus cajan]
Maker00014228	-1.7608	Down	NA	NA	NA	NA	NA	GO:0050661//NADP binding;GO:0004499//N,N-dimethylaniline monooxygenase activity;GO:0050660//flavin adenine dinucleotide binding;GO:0004497//monooxygenase activity	GO:0055114//oxidation-reduction process	K22324;K00485//dimethylaniline monooxygenase (N-oxide forming) [EC:1.14.13.8];K11816//indole-3-pyruvate monooxygenase [EC:1.14.13.168]	GAU23593.1//hypothetical protein TSUD_385820 [Trifolium subterraneum];XP_003542842.1//PREDICTED: flavin-containing monooxygenase FMO GS-OX5-like [Glycine max];XP_004511006.1//PREDICTED: flavin-containing monooxygenase FMO GS-OX5-like [Cicer arietinum]
Maker00002801	1.66621	Up	NA	NA	NA	NA	NA	NA	NA	K21867//potassium channel	ALX27201.1//outward rectifying K+ channel [Ammopiptanthus mongolicus]
Maker00021959	2.7285	Up	-7.41585	Down	-4.39983	Down	NA	GO:0004252//serine-type endopeptidase activity	NA	K12619//5'-3' exoribonuclease 2 [EC:3.1.13.-];K13199//plasminogen activator inhibitor 1 RNA-binding protein;K15333//tRNA guanosine-2'-O-methyltransferase [EC:2.1.1.34];K14568//rRNA small subunit pseudouridine methyltransferase Nep1 [EC:2.1.1.260]	XP_006590070.1//PREDICTED: cucumisin-like [Glycine max]
Maker00003685	1.85402	Up	-3.38332	Down	-1.46351	Down	NA	GO:0004674//protein serine/threonine kinase activity;GO:0005524//ATP binding	NA	K20714//serine/threonine-protein kinase OXI1 [EC:2.7.11.1]	CBI16412.3//unnamed protein product, partial [Vitis vinifera]
Maker00006686	1.59302	Up	-2.47171	Down	NA	NA	GO:0005634//nucleus;GO:0005667//transcription factor complex	GO:0001228//transcriptional activator activity, RNA polymerase II transcription regulatory region sequence-specific DNA binding;GO:0000977//RNA polymerase II regulatory region sequence-specific DNA binding;GO:0003682//chromatin binding;GO:0043565//sequence-specific DNA binding;GO:0008270//zinc ion binding;GO:0003700//DNA binding transcription factor activity;GO:0001085//RNA polymerase II transcri…	GO:0030154//cell differentiation	K21630//GATA-type zinc finger protein 1	XP_007161927.1//hypothetical protein PHAVU_001G109500g [Phaseolus vulgaris]
Maker00009475	1.08683	Up	-1.70958	Down	NA	NA	NA	NA	NA	K14399//polyribonucleotide 5'-hydroxyl-kinase [EC:2.7.1.78]	XP_016163202.1//random slug protein 5 [Arachis ipaensis];XP_016752245.1//PREDICTED: random slug protein 5-like isoform X1 [Gossypium hirsutum]
Maker00014125	-3.42528	Down	NA	NA	NA	NA	GO:0005576//extracellular region	GO:0004650//polygalacturonase activity	GO:0005975//carbohydrate metabolic process;GO:0071555//cell wall organization	K01184//polygalacturonase [EC:3.2.1.15];K01213//galacturan 1,4-alpha-galacturonidase [EC:3.2.1.67]	XP_019450530.1//PREDICTED: polygalacturonase-like isoform X2 [Lupinus angustifolius];XP_003545985.2//PREDICTED: polygalacturonase [Glycine max]
Maker00008251	2.58659	Up	-3.4582	Down	NA	NA	NA	NA	NA	K03363//cell division cycle 20, cofactor of APC complex	XP_006594209.1//PREDICTED: uncharacterized protein LOC100786697 [Glycine max]
Maker00009102	1.62355	Up	-2.27396	Down	NA	NA	GO:0016021//integral component of membrane	GO:0005524//ATP binding;GO:0004672//protein kinase activity	NA	K04733//interleukin-1 receptor-associated kinase 4 [EC:2.7.11.1]	XP_021903188.1//probable inactive receptor kinase At2g26730 [Carica papaya]
Maker00024360	-2.77724	Down	NA	NA	-4.3429	Down	NA	NA	NA	NA	XP_003598516.1//LRP1 carboxy-terminal domain protein [Medicago truncatula]
Maker00004625	1.20941	Up	NA	NA	2.25911	Up	GO:0005634//nucleus	GO:0000989//transcription factor activity, transcription factor binding;GO:0008270//zinc ion binding	GO:0006355//regulation of transcription, DNA-templated;GO:0009640//photomorphogenesis	K12135//zinc finger protein CONSTANS	KHN36052.1//Putative salt tolerance-like protein [Glycine soja];XP_020978711.1//B-box zinc finger protein 18 isoform X1 [Arachis ipaensis];XP_015964224.1//B-box zinc finger protein 18 [Arachis duranensis]
Maker00020742	-1.746	Down	1.61974	Up	NA	NA	NA	NA	NA	K01179//endoglucanase [EC:3.2.1.4];K11855//ubiquitin carboxyl-terminal hydrolase 36/42 [EC:3.4.19.12]	XP_018820993.1//PREDICTED: classical arabinogalactan protein 4-like [Juglans regia]
Maker00024009	1.11772	Up	-1.45922	Down	NA	NA	GO:0005634//nucleus	GO:0003677//DNA binding	GO:0006355//regulation of transcription, DNA-templated	K16670//homeobox protein Meis2;K15613//homeobox protein Meis1	XP_006577910.1//PREDICTED: BEL1-like homeodomain protein 6 [Glycine max]
Maker00011608	1.0414	Up	NA	NA	NA	NA	NA	NA	NA	K00688//glycogen phosphorylase [EC:2.4.1.1]	XP_020218048.1//ACT domain-containing protein ACR8-like [Cajanus cajan]
BGI_novel_G002528	1.68354	Up	-5.88377	Down	-3.82758	Down	NA	GO:0016758//transferase activity, transferring hexosyl groups	GO:0008152//metabolic process	K10757//flavonol 3-O-glucosyltransferase [EC:2.4.1.91];K12930//anthocyanidin 3-O-glucosyltransferase [EC:2.4.1.115]	XP_004485617.1//PREDICTED: anthocyanidin 3-O-glucosyltransferase 7 [Cicer arietinum]
Maker00005227	1.62365	Up	-3.93532	Down	-2.21388	Down	GO:0016021//integral component of membrane	NA	GO:0055114//oxidation-reduction process	NA	XP_020212934.1//cytochrome b561 and DOMON domain-containing protein At3g61750-like isoform X2 [Cajanus cajan]
Maker00017006	-1.64128	Down	2.77336	Up	NA	NA	GO:0016021//integral component of membrane	GO:0022857//transmembrane transporter activity	NA	K17500//integrin-linked kinase-associated serine/threonine phosphatase 2C [EC:3.1.3.16];K07874//Ras-related protein Rab-1A	XP_017438563.1//PREDICTED: WAT1-related protein At5g07050-like [Vigna angularis];XP_019458960.1//PREDICTED: WAT1-related protein At5g07050-like [Lupinus angustifolius]
Maker00008308	1.05145	Up	-1.34013	Down	NA	NA	NA	NA	NA	K06889//uncharacterized protein;K01076	XP_018814337.1//PREDICTED: protein ABHD17B-like [Juglans regia]
Maker00005621	1.81507	Up	-2.1854	Down	NA	NA	GO:0016021//integral component of membrane	NA	GO:0006810//transport	K19996//phosphatidylinositol transfer protein SFH5	XP_002264479.1//PREDICTED: patellin-6 [Vitis vinifera];XP_018826152.1//PREDICTED: patellin-6-like [Juglans regia]
Maker00004128	3.60584	Up	-4.69487	Down	NA	NA	NA	NA	NA	K19519//transforming growth factor-beta-induced protein	XP_007152043.1//hypothetical protein PHAVU_004G096900g [Phaseolus vulgaris]
Maker00017362	1.62864	Up	-2.1035	Down	NA	NA	NA	NA	NA	K11714//rhamnogalacturonan II specific xylosyltransferase [EC:2.4.2.-]	XP_008243121.1//PREDICTED: uncharacterized protein LOC103341387 isoform X2 [Prunus mume]
Maker00007926	1.1932	Up	-2.12908	Down	NA	NA	NA	NA	GO:0019538//protein metabolic process	K03695//ATP-dependent Clp protease ATP-binding subunit ClpB	XP_014514942.1//PREDICTED: uncharacterized protein LOC106772844 [Vigna radiata var. radiata]
Maker00012207	1.62707	Up	NA	NA	2.36609	Up	NA	NA	NA	K22013//magnesium dechelatase [EC:4.99.1.10]	XP_016201992.1//protein STAY-GREEN, chloroplastic [Arachis ipaensis];XP_021803389.1//protein STAY-GREEN, chloroplastic-like [Prunus avium]
Maker00013999	1.30409	Up	-4.57004	Down	-3.00218	Down	GO:0005634//nucleus;GO:0005737//cytoplasm	NA	NA	K04733//interleukin-1 receptor-associated kinase 4 [EC:2.7.11.1];K00276//primary-amine oxidase [EC:1.4.3.21]	XP_019435475.1//PREDICTED: uncharacterized protein LOC109341962 [Lupinus angustifolius]
Maker00002380	1.28466	Up	NA	NA	NA	NA	GO:0009705//plant-type vacuole membrane;GO:0016021//integral component of membrane	GO:0015369//calcium:proton antiporter activity	NA	K07300//Ca2+:H+ antiporter	XP_018826230.1//PREDICTED: vacuolar cation/proton exchanger 3-like [Juglans regia]
BGI_novel_G001800	1.32053	Up	-4.21589	Down	-2.92265	Down	NA	GO:0005544//calcium-dependent phospholipid binding;GO:0005509//calcium ion binding	NA	K17098//annexin D	XP_015937120.1//annexin-like protein RJ4 [Arachis duranensis]
BGI_novel_G001264	1.50361	Up	-4.06005	Down	-2.51771	Down	NA	GO:0004252//serine-type endopeptidase activity	NA	K12619//5'-3' exoribonuclease 2 [EC:3.1.13.-];K13199//plasminogen activator inhibitor 1 RNA-binding protein;K15333//tRNA guanosine-2'-O-methyltransferase [EC:2.1.1.34];K14568//rRNA small subunit pseudouridine methyltransferase Nep1 [EC:2.1.1.260]	XP_020203503.1//cucumisin-like [Cajanus cajan]
Maker00010526	2.40878	Up	-3.26673	Down	NA	NA	NA	GO:0017057//6-phosphogluconolactonase activity;GO:0016853//isomerase activity	GO:0006098//pentose-phosphate shunt;GO:0005975//carbohydrate metabolic process	K01057//6-phosphogluconolactonase [EC:3.1.1.31]	XP_020210007.1//probable 6-phosphogluconolactonase 4, chloroplastic [Cajanus cajan]
Maker00001001	3.896	Up	-5.38836	Down	NA	NA	GO:0005783//endoplasmic reticulum;GO:0016021//integral component of membrane;GO:0005886//plasma membrane	GO:0010329//auxin efflux transmembrane transporter activity	GO:0055085//transmembrane transport;GO:0009926//auxin polar transport;GO:0009734//auxin-activated signaling pathway;GO:0010252//auxin homeostasis	K13947//auxin efflux carrier family	XP_010664880.1//PREDICTED: auxin efflux carrier component 6 [Vitis vinifera];XP_020206123.1//auxin efflux carrier component 6 [Cajanus cajan]
Maker00005316	1.73853	Up	NA	NA	NA	NA	GO:0016021//integral component of membrane;GO:0005886//plasma membrane	GO:0005524//ATP binding;GO:0004672//protein kinase activity;GO:0004675//transmembrane receptor protein serine/threonine kinase activity	GO:0006468//protein phosphorylation;GO:0007166//cell surface receptor signaling pathway	K04733//interleukin-1 receptor-associated kinase 4 [EC:2.7.11.1]	XP_003546919.1//PREDICTED: probable receptor-like protein kinase At1g80640 isoform X2 [Glycine max];KHN22414.1//Putative receptor-like protein kinase [Glycine soja]
Maker00001528	2.36537	Up	-4.19187	Down	NA	NA	GO:0016021//integral component of membrane;GO:0005886//plasma membrane	GO:0051119//sugar transmembrane transporter activity	GO:0008643//carbohydrate transport	K15382//solute carrier family 50 (sugar transporter)	XP_019416107.1//PREDICTED: bidirectional sugar transporter SWEET3-like [Lupinus angustifolius];XP_004498397.1//PREDICTED: bidirectional sugar transporter SWEET3 [Cicer arietinum];ACU24301.1//unknown [Glycine max]
Maker00014799	2.10672	Up	-2.18617	Down	NA	NA	NA	GO:0003723//RNA binding	NA	K12741//heterogeneous nuclear ribonucleoprotein A1/A3	XP_020538521.1//RNA-binding protein 38 isoform X2 [Jatropha curcas]
Maker00001275	1.33277	Up	-4.52756	Down	-3.17348	Down	GO:0009705//plant-type vacuole membrane;GO:0016021//integral component of membrane	GO:0015369//calcium:proton antiporter activity	NA	K07300//Ca2+:H+ antiporter	KRH17033.1//hypothetical protein GLYMA_14G193400 [Glycine max];XP_003518305.2//PREDICTED: vacuolar cation/proton exchanger 3-like [Glycine max]
Maker00002569	1.05527	Up	NA	NA	2.09103	Up	NA	NA	GO:0010112//regulation of systemic acquired resistance	NA	OMP06779.1//hypothetical protein COLO4_07914 [Corchorus olitorius]
Maker00006905	-1.12516	Down	1.8731	Up	NA	NA	NA	GO:0050661//NADP binding;GO:0004499//N,N-dimethylaniline monooxygenase activity;GO:0050660//flavin adenine dinucleotide binding	NA	K11816//indole-3-pyruvate monooxygenase [EC:1.14.13.168]	XP_019440842.1//PREDICTED: probable indole-3-pyruvate monooxygenase YUCCA10 [Lupinus angustifolius]
Maker00000895	2.0075	Up	NA	NA	NA	NA	GO:0005634//nucleus	GO:0003677//DNA binding;GO:0003700//DNA binding transcription factor activity	GO:0006351//transcription, DNA-templated	K09286//EREBP-like factor	XP_003522460.1//PREDICTED: protein PPLZ02 [Glycine max]
Maker00013929	-1.85791	Down	1.6036	Up	NA	NA	NA	NA	NA	K12868//pre-mRNA-splicing factor SYF2	XP_015942063.1//uncharacterized protein LOC107467469 isoform X1 [Arachis duranensis]
BGI_novel_G000611	-1.89791	Down	1.52824	Up	NA	NA	NA	NA	GO:0009817//defense response to fungus, incompatible interaction;GO:0009651//response to salt stress	K04733//interleukin-1 receptor-associated kinase 4 [EC:2.7.11.1]	NP_001235877.1//PR-5b protein precursor [Glycine max]
Maker00006428	1.37711	Up	NA	NA	NA	NA	GO:0016021//integral component of membrane	NA	NA	K20887//xyloglucan glycosyltransferase 4 [EC:2.4.1.-]	XP_020206995.1//xyloglucan glycosyltransferase 4 [Cajanus cajan]
Maker00008667	-1.7207	Down	3.81874	Up	2.03486	Up	NA	GO:0008131//primary amine oxidase activity;GO:0005507//copper ion binding;GO:0048038//quinone binding	GO:0009308//amine metabolic process	K00276//primary-amine oxidase [EC:1.4.3.21]	XP_021592193.1//uncharacterized protein LOC110599894 [Manihot esculenta];XP_021650371.1//uncharacterized protein LOC110642586 isoform X1 [Hevea brasiliensis]
Maker00004073	1.1791	Up	-5.76422	Down	-4.47689	Down	NA	NA	NA	NA	XP_017982915.1//PREDICTED: protein FAF-like, chloroplastic isoform X1 [Theobroma cacao];XP_021674343.1//protein FAF-like, chloroplastic [Hevea brasiliensis]
Maker00012013	1.08798	Up	-1.22792	Down	NA	NA	GO:0005622//intracellular;GO:0016021//integral component of membrane	GO:0000155//phosphorelay sensor kinase activity	NA	K14489//arabidopsis histidine kinase 2/3/4 (cytokinin receptor) [EC:2.7.13.3]	XP_020217820.1//histidine kinase 1-like isoform X1 [Cajanus cajan];XP_006573548.1//PREDICTED: histidine kinase 1-like isoform X2 [Glycine max];XP_014631163.1//PREDICTED: histidine kinase 1-like isoform X1 [Glycine max]
Maker00015288	1.57001	Up	-2.5717	Down	NA	NA	GO:0005634//nucleus	GO:0043565//sequence-specific DNA binding;GO:0003700//DNA binding transcription factor activity	NA	K09338//homeobox-leucine zipper protein	XP_018854401.1//PREDICTED: homeobox-leucine zipper protein HAT3 [Juglans regia];XP_006445396.1//hypothetical protein CICLE_v10021501mg [Citrus clementina]
Maker00007009	2.6211	Up	-4.32427	Down	NA	NA	NA	NA	NA	K03350//anaphase-promoting complex subunit 3	XP_017439117.1//PREDICTED: uncharacterized protein LOC108345064 [Vigna angularis]
Maker00010135	1.11593	Up	NA	NA	NA	NA	NA	GO:0016740//transferase activity	NA	K21888//glutathione dehydrogenase/transferase [EC:1.8.5.1 2.5.1.18]	XP_013460594.1//glutathione S-transferase, amino-terminal domain protein [Medicago truncatula];XP_015956745.1//glutathione S-transferase DHAR3, chloroplastic [Arachis duranensis]
Maker00016169	1.55289	Up	-1.33167	Down	NA	NA	GO:0016021//integral component of membrane;GO:0005886//plasma membrane	GO:0004674//protein serine/threonine kinase activity;GO:0005524//ATP binding;GO:0004675//transmembrane receptor protein serine/threonine kinase activity	GO:0006468//protein phosphorylation;GO:0007166//cell surface receptor signaling pathway	K04733//interleukin-1 receptor-associated kinase 4 [EC:2.7.11.1];K13418//somatic embryogenesis receptor kinase 1 [EC:2.7.10.1 2.7.11.1]	XP_016200532.1//probable LRR receptor-like serine/threonine-protein kinase At2g23950 [Arachis ipaensis];XP_007154851.1//hypothetical protein PHAVU_003G152900g [Phaseolus vulgaris]
Maker00012043	-1.08051	Down	2.22443	Up	1.12166	Up	NA	NA	NA	K00688//glycogen phosphorylase [EC:2.4.1.1]	XP_020978580.1//ACT domain-containing protein ACR1 isoform X3 [Arachis ipaensis];XP_016201603.1//ACT domain-containing protein ACR1 isoform X2 [Arachis ipaensis];XP_016201599.1//ACT domain-containing protein ACR1 isoform X1 [Arachis ipaensis]
Maker00000294	1.08247	Up	-1.26521	Down	NA	NA	GO:0009507//chloroplast	GO:0008878//glucose-1-phosphate adenylyltransferase activity;GO:0005524//ATP binding	GO:0019252//starch biosynthetic process;GO:0005978//glycogen biosynthetic process	K00975//glucose-1-phosphate adenylyltransferase [EC:2.7.7.27]	XP_017436529.1//PREDICTED: glucose-1-phosphate adenylyltransferase large subunit 1-like [Vigna angularis]
Maker00006696	1.74585	Up	-4.71331	Down	-2.83056	Down	GO:0012505//endomembrane system;GO:0005622//intracellular;GO:0031201//SNARE complex;GO:0016021//integral component of membrane;GO:0005886//plasma membrane	GO:0000149//SNARE binding;GO:0005484//SNAP receptor activity	GO:0006886//intracellular protein transport;GO:0006906//vesicle fusion;GO:0048278//vesicle docking;GO:0016192//vesicle-mediated transport;GO:0006887//exocytosis	K08486//syntaxin 1B/2/3	XP_020240337.1//syntaxin-121-like [Cajanus cajan]
Maker00021607	-2.34026	Down	NA	NA	-3.47306	Down	GO:0005634//nucleus	GO:0003677//DNA binding;GO:0000981//RNA polymerase II transcription factor activity, sequence-specific DNA binding;GO:0043565//sequence-specific DNA binding;GO:0044212//transcription regulatory region DNA binding;GO:0001135//transcription factor activity, RNA polymerase II transcription factor recruiting	GO:0006357//regulation of transcription from RNA polymerase II promoter;GO:0030154//cell differentiation	K09422//transcription factor MYB, plant	XP_006593553.1//PREDICTED: transcription factor RAX1 [Glycine max]
Maker00024431	1.32842	Up	-1.81736	Down	NA	NA	GO:0016020//membrane;GO:0016021//integral component of membrane	GO:0016709//oxidoreductase activity, acting on paired donors, with incorporation or reduction of molecular oxygen, NAD(P)H as one donor, and incorporation of one atom of oxygen;GO:0016705//oxidoreductase activity, acting on paired donors, with incorporation or reduction of molecular oxygen;GO:0020037//heme binding;GO:0005506//iron ion binding;GO:0004497//monooxygenase activity	GO:0044550//secondary metabolite biosynthetic process	K00487//trans-cinnamate 4-monooxygenase [EC:1.14.13.11]	AOX49213.1//cinnamate 4-hydroxylase 2 [Acacia koa]
Maker00019368	-1.21657	Down	3.17051	Up	1.95318	Up	GO:0016021//integral component of membrane	GO:0016301//kinase activity	NA	K08869//aarF domain-containing kinase;K13457//disease resistance protein RPM1	XP_004502149.1//PREDICTED: uncharacterized aarF domain-containing protein kinase At1g79600, chloroplastic [Cicer arietinum];XP_020231095.1//uncharacterized protein LOC109811700 [Cajanus cajan]
Maker00012245	2.06532	Up	-2.17945	Down	NA	NA	NA	NA	NA	NA	XP_020236663.1//uncharacterized protein LOC109816178 [Cajanus cajan];KYP66697.1//hypothetical protein KK1_013003 [Cajanus cajan]
BGI_novel_G001736	1.80814	Up	NA	NA	NA	NA	NA	GO:0004190//aspartic-type endopeptidase activity	NA	K02882//large subunit ribosomal protein L18Ae;K01381//saccharopepsin [EC:3.4.23.25];K06002//pepsin A [EC:3.4.23.1]	XP_015932248.1//aspartic proteinase CDR1-like [Arachis duranensis]
Maker00011387	1.42668	Up	-2.56617	Down	NA	NA	GO:0005634//nucleus	GO:0003677//DNA binding	GO:0006355//regulation of transcription, DNA-templated	K04733//interleukin-1 receptor-associated kinase 4 [EC:2.7.11.1];K20043//clathrin coat assembly protein AP180;K09326//homeobox protein OTX1;K16222//Dof zinc finger protein DOF5.5	XP_007161571.1//hypothetical protein PHAVU_001G080800g, partial [Phaseolus vulgaris];KRH34272.1//hypothetical protein GLYMA_10G173700 [Glycine max]
Maker00013026	2.60464	Up	NA	NA	NA	NA	GO:0016021//integral component of membrane	NA	NA	K15503//serine/threonine-protein phosphatase 6 regulatory ankyrin repeat subunit B;K11984//U4/U6.U5 tri-snRNP-associated protein 1;K15923//alpha-L-fucosidase 2 [EC:3.2.1.51]	XP_019051622.1//PREDICTED: uncharacterized protein LOC104587959 [Nelumbo nucifera];XP_005832181.1//hypothetical protein GUITHDRAFT_139125 [Guillardia theta CCMP2712]
Maker00001346	2.54391	Up	-2.53491	Down	NA	NA	NA	NA	NA	K07297//adiponectin receptor	BAT77925.1//hypothetical protein VIGAN_02053900 [Vigna angularis var. angularis];XP_017421309.1//PREDICTED: uncharacterized protein LOC108331178 isoform X2 [Vigna angularis]
Maker00005004	1.78359	Up	-3.10653	Down	NA	NA	GO:0016021//integral component of membrane	GO:0005524//ATP binding;GO:0008553//hydrogen-exporting ATPase activity, phosphorylative mechanism	GO:0006754//ATP biosynthetic process	K01535//H+-transporting ATPase [EC:3.6.3.6]	KHG14131.1//ATPase 4, plasma membrane-type -like protein [Gossypium arboreum];KJB70025.1//hypothetical protein B456_011G053900 [Gossypium raimondii]
Maker00014065	1.56002	Up	-3.24841	Down	NA	NA	GO:0016021//integral component of membrane	GO:0005215//transporter activity	GO:0055085//transmembrane transport	K14611//solute carrier family 23 (nucleobase transporter), member 1/2	XP_003555298.1//PREDICTED: nucleobase-ascorbate transporter 4-like [Glycine max]
Maker00006341	2.55306	Up	-4.54282	Down	NA	NA	GO:0016021//integral component of membrane	GO:0005524//ATP binding;GO:0004672//protein kinase activity	NA	K04733//interleukin-1 receptor-associated kinase 4 [EC:2.7.11.1]	XP_022144614.1//leucine-rich repeat receptor-like protein kinase PXC1 [Momordica charantia]
Maker00008073	2.11161	Up	-3.81559	Down	-1.57197	Down	NA	GO:0016788//hydrolase activity, acting on ester bonds	NA	K01206//alpha-L-fucosidase [EC:3.2.1.51]	NP_001242659.1//uncharacterized protein LOC100805314 precursor [Glycine max]
Maker00024853	2.86956	Up	-3.10913	Down	NA	NA	GO:0005794//Golgi apparatus	GO:0016413//O-acetyltransferase activity	GO:0071554//cell wall organization or biogenesis	NA	XP_020213426.1//protein trichome birefringence-like 36 [Cajanus cajan]
Maker00022998	-1.48433	Down	1.82228	Up	NA	NA	GO:0016021//integral component of membrane	NA	NA	NA	BAO45897.1//hypothetical protein [Acacia mangium]
Maker00011458	1.92933	Up	-3.2138	Down	NA	NA	NA	GO:0030246//carbohydrate binding;GO:0008810//cellulase activity	GO:0030245//cellulose catabolic process	K01179//endoglucanase [EC:3.2.1.4]	XP_003525345.1//PREDICTED: endoglucanase 6 [Glycine max]
Maker00012754	1.44318	Up	NA	NA	NA	NA	NA	NA	NA	K11804//WD repeat-containing protein 42A	XP_020224741.1//DDB1- and CUL4-associated factor 8 [Cajanus cajan]
BGI_novel_G001146	-1.31712	Down	NA	NA	NA	NA	NA	NA	NA	NA	XP_020890732.1//uncharacterized protein LOC110230872 [Arabidopsis lyrata subsp. lyrata]
Maker00017425	1.85826	Up	-4.22864	Down	-2.23545	Down	GO:0005871//kinesin complex	GO:0005524//ATP binding;GO:0003777//microtubule motor activity;GO:0008017//microtubule binding;GO:0016887//ATPase activity	GO:0007018//microtubule-based movement	K10406//kinesin family member C2/C3	XP_020238906.1//kinesin-like protein KIN-14I isoform X2 [Cajanus cajan]
Maker00020287	-1.20689	Down	NA	NA	NA	NA	GO:0016021//integral component of membrane;GO:0005886//plasma membrane	GO:0005524//ATP binding;GO:0042626//ATPase activity, coupled to transmembrane movement of substances;GO:0016887//ATPase activity	NA	K05681//ATP-binding cassette, subfamily G (WHITE), member 2;K21396//ATP-binding cassette, subfamily G (WHITE), eye pigment precursor transporter	XP_003520157.2//PREDICTED: ABC transporter G family member 21-like isoform X2 [Glycine max]
Maker00015405	1.15696	Up	NA	NA	NA	NA	NA	NA	NA	NA	NA
Maker00017088	2.05685	Up	-4.33217	Down	-2.09411	Down	GO:0016021//integral component of membrane	NA	NA	K22733	XP_020232335.1//uncharacterized protein At1g04910 isoform X2 [Cajanus cajan]
Maker00022910	1.35231	Up	-1.87284	Down	NA	NA	GO:0016021//integral component of membrane	NA	NA	K03549//KUP system potassium uptake protein;K11593//eukaryotic translation initiation factor 2C	KHN24136.1//hypothetical protein glysoja_046686 [Glycine soja]
Maker00005508	1.28498	Up	-2.71957	Down	-1.3877	Down	GO:0016021//integral component of membrane	NA	NA	NA	XP_018818271.1//PREDICTED: uncharacterized protein LOC108989191 [Juglans regia]
Maker00012855	1.164	Up	-2.62543	Down	NA	NA	GO:0048046//apoplast	GO:0016722//oxidoreductase activity, oxidizing metal ions;GO:0052716//hydroquinone:oxygen oxidoreductase activity;GO:0005507//copper ion binding	GO:0046274//lignin catabolic process	K05909//laccase [EC:1.10.3.2]	XP_006592189.1//PREDICTED: laccase-2-like [Glycine max]
Maker00023765	2.63947	Up	-3.24759	Down	NA	NA	GO:0005634//nucleus	NA	NA	K18810//cyclin D1/2/4, plant	XP_017970111.1//PREDICTED: cyclin-D4-1 [Theobroma cacao]
Maker00012463	2.14194	Up	NA	NA	NA	NA	GO:0016021//integral component of membrane	GO:0005215//transporter activity	NA	K09872//aquaporin PIP	XP_017433699.1//PREDICTED: aquaporin PIP2-7-like [Vigna angularis]
Maker00024889	-1.1486	Down	NA	NA	NA	NA	NA	GO:0004616//phosphogluconate dehydrogenase (decarboxylating) activity	GO:0006098//pentose-phosphate shunt;GO:0019521//D-gluconate metabolic process	K00033//6-phosphogluconate dehydrogenase [EC:1.1.1.44 1.1.1.343]	NP_001236726.2//6-phosphogluconate dehydrogenase [Glycine max];XP_015946452.1//6-phosphogluconate dehydrogenase, decarboxylating 3 [Arachis duranensis]
Maker00015882	-1.40202	Down	NA	NA	NA	NA	NA	GO:0016491//oxidoreductase activity	NA	K14521//N-acetyltransferase 10 [EC:2.3.1.-];K05275//pyridoxine 4-dehydrogenase [EC:1.1.1.65];K17744//L-galactose dehydrogenase [EC:1.1.1.316]	XP_016183288.1//uncharacterized protein LOC107625222 [Arachis ipaensis]
Maker00019847	1.16361	Up	NA	NA	NA	NA	NA	GO:0008422//beta-glucosidase activity;GO:0102483//scopolin beta-glucosidase activity	GO:0030245//cellulose catabolic process	K01188//beta-glucosidase [EC:3.2.1.21]	XP_003538061.1//PREDICTED: beta-glucosidase 42 [Glycine max]
Maker00013036	1.64905	Up	-3.85514	Down	NA	NA	NA	NA	NA	K04733//interleukin-1 receptor-associated kinase 4 [EC:2.7.11.1]	KHG20383.1//Inactive protein kinase [Gossypium arboreum];XP_019422524.1//PREDICTED: probable serine/threonine-protein kinase PBL7 isoform X2 [Lupinus angustifolius]
BGI_novel_G001180	-1.11436	Down	NA	NA	NA	NA	GO:0016021//integral component of membrane	GO:0004185//serine-type carboxypeptidase activity	GO:0051603//proteolysis involved in cellular protein catabolic process	K16297//serine carboxypeptidase-like clade II [EC:3.4.16.-]	XP_020217575.1//serine carboxypeptidase-like 42 [Cajanus cajan]
BGI_novel_G002039	1.90936	Up	-2.56112	Down	NA	NA	NA	NA	NA	K00660//chalcone synthase [EC:2.3.1.74]	AOX49211.1//chalcone synthase [Acacia koa]
Maker00021124	1.88895	Up	-2.77554	Down	NA	NA	NA	NA	NA	NA	XP_016184907.1//protein SIEVE ELEMENT OCCLUSION B [Arachis ipaensis];XP_017412280.1//PREDICTED: protein SIEVE ELEMENT OCCLUSION B-like [Vigna angularis]
Maker00003197	2.23606	Up	-4.66839	Down	NA	NA	GO:0005794//Golgi apparatus;GO:0016021//integral component of membrane	GO:0015020//glucuronosyltransferase activity	GO:0045492//xylan biosynthetic process;GO:0009834//plant-type secondary cell wall biogenesis	K20890//xylan alpha-glucuronosyltransferase [EC:2.4.1.-]	XP_017420123.1//PREDICTED: UDP-glucuronate:xylan alpha-glucuronosyltransferase 1-like isoform X1 [Vigna angularis]
Maker00011230	1.48156	Up	-2.38899	Down	NA	NA	GO:0016021//integral component of membrane	NA	NA	NA	XP_014513813.1//PREDICTED: transmembrane protein 45B-like [Vigna radiata var. radiata]
Maker00002576	1.68238	Up	NA	NA	NA	NA	GO:0005634//nucleus	GO:0003676//nucleic acid binding	NA	K05747//Wiskott-Aldrich syndrome protein;K10773//endonuclease III [EC:4.2.99.18]	XP_019445577.1//PREDICTED: zinc finger protein 6-like isoform X1 [Lupinus angustifolius]
Maker00013194	-1.5551	Down	2.56223	Up	NA	NA	NA	GO:0009055//electron transfer activity	NA	K03006//DNA-directed RNA polymerase II subunit RPB1 [EC:2.7.7.6]	XP_017423833.1//PREDICTED: extensin [Vigna angularis]
Maker00024805	1.85608	Up	-1.82143	Down	NA	NA	GO:0005887//integral component of plasma membrane	GO:0008515//sucrose transmembrane transporter activity	NA	K15378//solute carrier family 45, member 1/2/4	NP_001335852.1//sucrose transporter [Glycine max]
Maker00011528	1.57992	Up	-2.82587	Down	NA	NA	GO:0016021//integral component of membrane;GO:0005886//plasma membrane	GO:0005524//ATP binding;GO:0042626//ATPase activity, coupled to transmembrane movement of substances;GO:0016887//ATPase activity	NA	K05681//ATP-binding cassette, subfamily G (WHITE), member 2	XP_003517105.2//PREDICTED: ABC transporter G family member 14 [Glycine max]
Maker00015678	1.36265	Up	-1.88341	Down	NA	NA	GO:0016020//membrane;GO:0005618//cell wall	GO:0004252//serine-type endopeptidase activity	NA	K12619//5'-3' exoribonuclease 2 [EC:3.1.13.-];K13199//plasminogen activator inhibitor 1 RNA-binding protein;K15333//tRNA guanosine-2'-O-methyltransferase [EC:2.1.1.34];K09338//homeobox-leucine zipper protein;K13124//mitogen-activated protein kinase organizer 1	XP_012573412.1//PREDICTED: subtilisin-like protease SBT2.5 [Cicer arietinum];XP_020227255.1//subtilisin-like protease SBT2.5 [Cajanus cajan]
Maker00006012	3.09753	Up	-5.10065	Down	NA	NA	NA	NA	NA	NA	XP_020239813.1//protein E6-like [Cajanus cajan]
BGI_novel_G002792	2.01228	Up	NA	NA	NA	NA	GO:0016021//integral component of membrane	GO:0005524//ATP binding;GO:0004672//protein kinase activity	NA	K04733//interleukin-1 receptor-associated kinase 4 [EC:2.7.11.1]	XP_016207337.1//rust resistance kinase Lr10-like [Arachis ipaensis]
Maker00012842	1.71689	Up	-3.25446	Down	NA	NA	GO:0016021//integral component of membrane;GO:0000139//Golgi membrane	GO:0047262//polygalacturonate 4-alpha-galacturonosyltransferase activity	GO:0045489//pectin biosynthetic process;GO:0071555//cell wall organization	K20867//galacturonosyltransferase 12/13/14/15 [EC:2.4.1.-]	XP_016170753.1//probable galacturonosyltransferase 12 [Arachis ipaensis];XP_022154951.1//probable galacturonosyltransferase 12 [Momordica charantia]
Maker00020552	-1.43714	Down	3.78274	Up	2.26695	Up	NA	NA	NA	K00993//ethanolaminephosphotransferase [EC:2.7.8.1]	XP_019429337.1//PREDICTED: uncharacterized protein LOC109336946 [Lupinus angustifolius]
Maker00013516	-2.75466	Down	NA	NA	NA	NA	NA	GO:0030246//carbohydrate binding	NA	K04733//interleukin-1 receptor-associated kinase 4 [EC:2.7.11.1]	XP_011015045.1//PREDICTED: mannose/glucose-specific lectin-like isoform X1 [Populus euphratica];XP_011001798.1//PREDICTED: mannose/glucose-specific lectin-like isoform X3 [Populus euphratica]
Maker00013050	1.29215	Up	-4.42935	Down	-2.97465	Down	GO:0016021//integral component of membrane	NA	NA	NA	XP_007211501.1//uncharacterized protein LOC18778790 [Prunus persica]
Maker00013892	1.4169	Up	-2.45469	Down	-1.00342	Down	GO:0005737//cytoplasm	GO:0008270//zinc ion binding;GO:0004476//mannose-6-phosphate isomerase activity	GO:0000032//cell wall mannoprotein biosynthetic process;GO:0006486//protein glycosylation;GO:0005975//carbohydrate metabolic process;GO:0009298//GDP-mannose biosynthetic process	K01809//mannose-6-phosphate isomerase [EC:5.3.1.8]	XP_003552724.1//PREDICTED: mannose-6-phosphate isomerase 1 [Glycine max]
BGI_novel_G000783	2.20556	Up	NA	NA	3.20487	Up	GO:0016021//integral component of membrane	NA	NA	K13420//LRR receptor-like serine/threonine-protein kinase FLS2 [EC:2.7.11.1]	XP_006389187.1//hypothetical protein POPTR_0039s00380g [Populus trichocarpa]
Maker00018403	1.45682	Up	-1.43979	Down	NA	NA	GO:0016021//integral component of membrane	GO:0008270//zinc ion binding;GO:0003676//nucleic acid binding	NA	K10569//endonuclease VIII-like 3;K07390//monothiol glutaredoxin;K06941//23S rRNA (adenine2503-C2)-methyltransferase [EC:2.1.1.192]	XP_019430822.1//PREDICTED: uncharacterized protein LOC109338132 [Lupinus angustifolius]
Maker00024593	1.28062	Up	-1.98091	Down	NA	NA	NA	NA	NA	K00430//peroxidase [EC:1.11.1.7];K10799	XP_015942091.1//uncharacterized protein LOC107467490 [Arachis duranensis];XP_003555882.1//PREDICTED: uncharacterized protein LOC100807364 [Glycine max]
Maker00008842	2.42688	Up	-5.27435	Down	NA	NA	GO:0005576//extracellular region	GO:0004650//polygalacturonase activity	GO:0005975//carbohydrate metabolic process;GO:0071555//cell wall organization	K01213//galacturan 1,4-alpha-galacturonidase [EC:3.2.1.67]	XP_014517599.1//PREDICTED: polygalacturonase At1g48100-like [Vigna radiata var. radiata]
Maker00017717	-2.45268	Down	NA	NA	NA	NA	GO:0005634//nucleus	GO:0003677//DNA binding;GO:0000981//RNA polymerase II transcription factor activity, sequence-specific DNA binding;GO:0043565//sequence-specific DNA binding;GO:0044212//transcription regulatory region DNA binding;GO:0001135//transcription factor activity, RNA polymerase II transcription factor recruiting	GO:0006357//regulation of transcription from RNA polymerase II promoter;GO:0030154//cell differentiation	K09422//transcription factor MYB, plant	XP_020213217.1//transcription factor MYB14-like [Cajanus cajan]
Maker00008462	1.78592	Up	NA	NA	1.59168	Up	GO:0010287//plastoglobule;GO:0009535//chloroplast thylakoid membrane;GO:0009523//photosystem II;GO:0016021//integral component of membrane;GO:0009941//chloroplast envelope;GO:0009522//photosystem I	GO:0031409//pigment binding;GO:0016168//chlorophyll binding	GO:0009768//photosynthesis, light harvesting in photosystem I;GO:0009765//photosynthesis, light harvesting;GO:0009416//response to light stimulus;GO:0018298//protein-chromophore linkage	K08913//light-harvesting complex II chlorophyll a/b binding protein 2	XP_004144543.1//PREDICTED: chlorophyll a-b binding protein 151, chloroplastic [Cucumis sativus]
Maker00014552	-1.47472	Down	NA	NA	-1.04494	Down	GO:0016021//integral component of membrane	GO:0005215//transporter activity	GO:0006857//oligopeptide transport	K14638//solute carrier family 15 (peptide/histidine transporter), member 3/4	XP_014522793.1//PREDICTED: protein NRT1/ PTR FAMILY 5.4 [Vigna radiata var. radiata]
Maker00021115	1.25986	Up	NA	NA	2.0678	Up	NA	NA	NA	K06617//raffinose synthase [EC:2.4.1.82]	XP_015935852.2//probable galactinol--sucrose galactosyltransferase 6 [Arachis duranensis]
Maker00004746	1.56848	Up	-1.49493	Down	NA	NA	GO:0016021//integral component of membrane	NA	NA	NA	KDO61349.1//hypothetical protein CISIN_1g009613mg [Citrus sinensis]
Maker00009662	1.21909	Up	-1.24093	Down	NA	NA	NA	GO:0003676//nucleic acid binding	NA	NA	XP_003550423.1//PREDICTED: uncharacterized protein LOC100816726 [Glycine max];XP_017430718.1//PREDICTED: uncharacterized protein LOC108338387 [Vigna angularis]
Maker00011686	1.18031	Up	NA	NA	NA	NA	GO:0005634//nucleus	GO:0003677//DNA binding;GO:0044212//transcription regulatory region DNA binding	GO:0048481//plant ovule development;GO:0006355//regulation of transcription, DNA-templated;GO:0006351//transcription, DNA-templated;GO:0009944//polarity specification of adaxial/abaxial axis	K02184//formin 2	XP_003612825.1//transcription factor KAN2 [Medicago truncatula]
Maker00023963	1.07203	Up	-1.0653	Down	NA	NA	NA	NA	NA	K00860//adenylylsulfate kinase [EC:2.7.1.25]	XP_016202383.1//adenylyl-sulfate kinase 3 isoform X2 [Arachis ipaensis];XP_016202381.1//adenylyl-sulfate kinase 3 isoform X1 [Arachis ipaensis]
Maker00017118	1.19455	Up	-2.02065	Down	NA	NA	GO:0016021//integral component of membrane	GO:0004180//carboxypeptidase activity	NA	K01301//N-acetylated-alpha-linked acidic dipeptidase [EC:3.4.17.21]	XP_019426396.1//PREDICTED: probable glutamate carboxypeptidase 2 [Lupinus angustifolius];XP_014496352.1//PREDICTED: probable glutamate carboxypeptidase 2 [Vigna radiata var. radiata]
Maker00010511	1.36163	Up	-2.33356	Down	NA	NA	NA	NA	NA	K14505//cyclin D3, plant	XP_021284290.1//cyclin-D3-1-like isoform X2 [Herrania umbratica]
Maker00010815	-1.38871	Down	NA	NA	NA	NA	NA	NA	NA	K08869//aarF domain-containing kinase	XP_015969222.1//putative methyltransferase DDB_G0268948 [Arachis duranensis];AFK45765.1//unknown [Lotus japonicus]
Maker00013236	1.50584	Up	-3.19726	Down	NA	NA	GO:0005634//nucleus	GO:0003677//DNA binding;GO:0000981//RNA polymerase II transcription factor activity, sequence-specific DNA binding;GO:0043565//sequence-specific DNA binding;GO:0044212//transcription regulatory region DNA binding;GO:0001135//transcription factor activity, RNA polymerase II transcription factor recruiting	GO:0006357//regulation of transcription from RNA polymerase II promoter;GO:0030154//cell differentiation	K09422//transcription factor MYB, plant	XP_006590966.1//PREDICTED: transcription factor MYB46-like [Glycine max]
Maker00011453	1.22617	Up	-2.69566	Down	NA	NA	GO:0005618//cell wall;GO:0005773//vacuole	GO:0030246//carbohydrate binding;GO:0004565//beta-galactosidase activity	GO:0005975//carbohydrate metabolic process	K12309//beta-galactosidase [EC:3.2.1.23]	XP_020234057.1//beta-galactosidase 3-like [Cajanus cajan]
Maker00003985	1.80416	Up	-4.20158	Down	-2.45598	Down	NA	GO:0004185//serine-type carboxypeptidase activity	NA	K09646//serine carboxypeptidase 1 [EC:3.4.16.-]	XP_014621518.1//PREDICTED: serine carboxypeptidase-like 51 isoform X1 [Glycine max]
Maker00023249	1.2663	Up	-2.43306	Down	NA	NA	GO:0005886//plasma membrane	GO:0005524//ATP binding;GO:0004672//protein kinase activity;GO:0004675//transmembrane receptor protein serine/threonine kinase activity	GO:0006468//protein phosphorylation;GO:0007166//cell surface receptor signaling pathway;GO:0009742//brassinosteroid mediated signaling pathway	K14500//BR-signaling kinase [EC:2.7.11.1]	KHN32516.1//Putative serine/threonine-protein kinase [Glycine soja];BAT97261.1//hypothetical protein VIGAN_09065300 [Vigna angularis var. angularis]
Maker00023352	2.93951	Up	-3.30692	Down	NA	NA	GO:0016021//integral component of membrane	NA	NA	K13946//auxin influx carrier (AUX1 LAX family)	XP_021285694.1//auxin transporter-like protein 5 [Herrania umbratica];XP_003540652.1//PREDICTED: auxin transporter-like protein 5 [Glycine max]
Maker00009116	-1.94804	Down	4.07315	Up	2.02978	Up	GO:0016021//integral component of membrane	GO:0005215//transporter activity	GO:0006857//oligopeptide transport	K14638//solute carrier family 15 (peptide/histidine transporter), member 3/4	XP_007154995.1//hypothetical protein PHAVU_003G164000g [Phaseolus vulgaris]
Maker00002432	1.63485	Up	-4.03555	Down	-2.25388	Down	NA	NA	NA	K03063//26S proteasome regulatory subunit T3	XP_020208432.1//BTB/POZ domain-containing protein At5g48800 isoform X2 [Cajanus cajan];XP_015949907.1//BTB/POZ domain-containing protein At5g48800 [Arachis duranensis]
Maker00024749	-1.10095	Down	NA	NA	NA	NA	GO:0016021//integral component of membrane;GO:0005886//plasma membrane	GO:0051536//iron-sulfur cluster binding	NA	K02923//large subunit ribosomal protein L38e	KHN23137.1//CASP-like protein [Glycine soja];XP_004497293.1//PREDICTED: CASP-like protein 4C2 [Cicer arietinum];XP_019451118.1//PREDICTED: CASP-like protein 4C2 [Lupinus angustifolius]
Maker00004011	-1.50478	Down	NA	NA	NA	NA	GO:0016021//integral component of membrane	NA	NA	NA	XP_010101792.1//hypothetical protein L484_018748 [Morus notabilis]
Maker00018587	-1.69301	Down	-2.86575	Down	-4.52279	Down	NA	NA	NA	K16223//protein FLOWERING LOCUS T	XP_008441938.1//PREDICTED: protein MOTHER of FT and TFL1-like [Cucumis melo];XP_018820141.1//PREDICTED: protein MOTHER of FT and TFL1-like [Juglans regia];AQK89898.1//Protein MOTHER of FT and TFL1 [Zea mays]
Maker00003082	2.76338	Up	-2.89652	Down	NA	NA	NA	GO:0004568//chitinase activity	GO:0006032//chitin catabolic process;GO:0016998//cell wall macromolecule catabolic process;GO:0005975//carbohydrate metabolic process	K20547//basic endochitinase B [EC:3.2.1.14]	XP_019440177.1//PREDICTED: chitinase-like protein 2 [Lupinus angustifolius]
Maker00022568	-1.81611	Down	2.82496	Up	NA	NA	NA	GO:0003677//DNA binding	NA	K15777//4,5-DOPA dioxygenase extradiol [EC:1.13.11.-];K15601//lysine-specific demethylase 3 [EC:1.14.11.-];K02184//formin 2	XP_007158652.1//hypothetical protein PHAVU_002G171000g [Phaseolus vulgaris]
Maker00023113	1.32331	Up	-3.14103	Down	NA	NA	NA	NA	NA	K19041//E3 ubiquitin-protein ligase RNF38/44 [EC:2.3.2.27]	NP_001304580.2//putative E3 ubiquitin-protein ligase [Glycine max];KHN38932.1//E3 ubiquitin-protein ligase [Glycine soja]
Maker00004807	1.66142	Up	-1.6585	Down	NA	NA	NA	GO:0004190//aspartic-type endopeptidase activity	GO:0006508//proteolysis;GO:0030163//protein catabolic process	K05909//laccase [EC:1.10.3.2];K22683	XP_021592252.1//aspartic proteinase PCS1 [Manihot esculenta]
Maker00008750	-1.10667	Down	NA	NA	-1.43879	Down	GO:0008541//proteasome regulatory particle, lid subcomplex	GO:0004842//ubiquitin-protein transferase activity	GO:0006406//mRNA export from nucleus;GO:0043248//proteasome assembly	K08332//vacuolar protein 8;K10881//26 proteasome complex subunit DSS1	XP_003527024.1//PREDICTED: probable 26S proteasome complex subunit sem1-2 [Glycine max];XP_006476756.2//PREDICTED: U-box domain-containing protein 19-like [Citrus sinensis]
Maker00011936	1.26031	Up	-2.06888	Down	NA	NA	NA	NA	NA	K00475//naringenin 3-dioxygenase [EC:1.14.11.9]	XP_016180725.1//naringenin,2-oxoglutarate 3-dioxygenase [Arachis ipaensis]
Maker00004706	1.41188	Up	-2.35586	Down	NA	NA	NA	GO:0016757//transferase activity, transferring glycosyl groups	NA	K20893//probable galacturonosyltransferase-like 1 [EC:2.4.1.-]	XP_007156891.1//hypothetical protein PHAVU_002G026000g [Phaseolus vulgaris]
Maker00001861	2.12839	Up	-2.44809	Down	NA	NA	NA	NA	NA	K02184//formin 2	XP_014512231.1//PREDICTED: leucine-rich repeat extensin-like protein 4 [Vigna radiata var. radiata]
BGI_novel_G001233	1.65384	Up	-2.75309	Down	NA	NA	GO:0005737//cytoplasm	GO:0017057//6-phosphogluconolactonase activity;GO:0016853//isomerase activity	GO:0006098//pentose-phosphate shunt;GO:0005975//carbohydrate metabolic process;GO:0009051//pentose-phosphate shunt, oxidative branch	K01057//6-phosphogluconolactonase [EC:3.1.1.31]	XP_003544132.1//PREDICTED: probable 6-phosphogluconolactonase 4, chloroplastic [Glycine max]
Maker00020936	1.21381	Up	1.52801	Up	2.81417	Up	NA	GO:0008270//zinc ion binding	NA	K16282//E3 ubiquitin-protein ligase RHA2 [EC:2.3.2.27]	AFK42024.1//unknown [Lotus japonicus]
Maker00000044	1.03477	Up	-1.73469	Down	NA	NA	GO:0016021//integral component of membrane	GO:0003676//nucleic acid binding	NA	NA	XP_004500239.1//PREDICTED: uncharacterized protein LOC101489748 [Cicer arietinum];XP_018812797.1//PREDICTED: uncharacterized protein LOC108985086 [Juglans regia]
Maker00018155	1.4168	Up	NA	NA	NA	NA	NA	NA	NA	K22706;K13030//cyanohydrin beta-glucosyltransferase [EC:2.4.1.85];K21374//7-deoxyloganetin glucosyltransferase [EC:2.4.1.324]	OVA07951.1//UDP-glucuronosyl/UDP-glucosyltransferase [Macleaya cordata]
Maker00018539	1.42618	Up	-4.39608	Down	-2.6929	Down	GO:0005618//cell wall;GO:0016021//integral component of membrane	GO:0045330//aspartyl esterase activity;GO:0004857//enzyme inhibitor activity;GO:0030599//pectinesterase activity	GO:0045490//pectin catabolic process;GO:0042545//cell wall modification	K01051//pectinesterase [EC:3.1.1.11]	XP_017437868.1//PREDICTED: pectinesterase-like isoform X1 [Vigna angularis];XP_019428700.1//PREDICTED: pectinesterase-like [Lupinus angustifolius]
Maker00008150	1.28651	Up	NA	NA	NA	NA	NA	GO:0005524//ATP binding	NA	K10355//actin, other eukaryote	XP_007016432.1//PREDICTED: actin [Theobroma cacao]
Maker00002613	1.44706	Up	-2.84784	Down	NA	NA	GO:0016021//integral component of membrane	GO:0016747//transferase activity, transferring acyl groups other than amino-acyl groups	GO:0006633//fatty acid biosynthetic process	K15397//3-ketoacyl-CoA synthase [EC:2.3.1.199]	XP_003536684.1//PREDICTED: 3-ketoacyl-CoA synthase 6 [Glycine max]
Maker00009224	1.72891	Up	-2.1715	Down	NA	NA	NA	GO:0004252//serine-type endopeptidase activity	NA	K12619//5'-3' exoribonuclease 2 [EC:3.1.13.-];K15333//tRNA guanosine-2'-O-methyltransferase [EC:2.1.1.34];K14568//rRNA small subunit pseudouridine methyltransferase Nep1 [EC:2.1.1.260]	XP_017410252.1//PREDICTED: cucumisin-like [Vigna angularis];XP_006590070.1//PREDICTED: cucumisin-like [Glycine max]
Maker00007539	1.40198	Up	-3.98256	Down	-2.38415	Down	GO:0016021//integral component of membrane	GO:0005524//ATP binding;GO:0004672//protein kinase activity	NA	K04733//interleukin-1 receptor-associated kinase 4 [EC:2.7.11.1]	XP_003548248.1//PREDICTED: LRR receptor-like serine/threonine-protein kinase GSO2 [Glycine max]
Maker00015803	-2.69093	Down	1.72037	Up	NA	NA	GO:0005634//nucleus	GO:0003677//DNA binding;GO:0000981//RNA polymerase II transcription factor activity, sequence-specific DNA binding;GO:0043565//sequence-specific DNA binding;GO:0044212//transcription regulatory region DNA binding;GO:0001135//transcription factor activity, RNA polymerase II transcription factor recruiting	GO:0006357//regulation of transcription from RNA polymerase II promoter;GO:0030154//cell differentiation	K09422//transcription factor MYB, plant	XP_020206050.1//transcription factor MYB14-like [Cajanus cajan]
Maker00004238	-1.44283	Down	2.08904	Up	NA	NA	NA	GO:0046983//protein dimerization activity	NA	K01772//protoporphyrin/coproporphyrin ferrochelatase [EC:4.99.1.1 4.99.1.9];K13422//transcription factor MYC2	XP_019446579.1//PREDICTED: transcription factor EGL1 [Lupinus angustifolius];OIW09872.1//hypothetical protein TanjilG_24527 [Lupinus angustifolius]
Maker00000911	2.54412	Up	-2.93895	Down	NA	NA	GO:0016021//integral component of membrane	GO:0004674//protein serine/threonine kinase activity;GO:0005524//ATP binding	NA	K00924//kinase [EC:2.7.1.-];K17422//large subunit ribosomal protein L41;K13420//LRR receptor-like serine/threonine-protein kinase FLS2 [EC:2.7.11.1]	XP_020222066.1//probable LRR receptor-like serine/threonine-protein kinase At4g26540 [Cajanus cajan];KHN31693.1//Putative LRR receptor-like serine/threonine-protein kinase [Glycine soja]
BGI_novel_G000277	2.07133	Up	-3.41662	Down	NA	NA	NA	NA	NA	K13473//chitin elicitor-binding protein;K13429//chitin elicitor receptor kinase 1	XP_017419782.1//PREDICTED: lysM domain-containing GPI-anchored protein 1 [Vigna angularis]
BGI_novel_G003019	-2.25048	Down	NA	NA	NA	NA	NA	NA	GO:0007165//signal transduction	K07466//replication factor A1;K22038//volume-regulated anion channel;K13414//mitogen-activated protein kinase kinase kinase 1 [EC:2.7.11.25]	XP_019461645.1//PREDICTED: TMV resistance protein N-like [Lupinus angustifolius]
BGI_novel_G003033	1.68058	Up	-3.99981	Down	NA	NA	GO:0016021//integral component of membrane;GO:0005802//trans-Golgi network;GO:0005886//plasma membrane	NA	NA	K14514//ethylene-insensitive protein 3	XP_020239767.1//phosphate transporter PHO1 homolog 3-like [Cajanus cajan]
Maker00013446	-1.06492	Down	NA	NA	NA	NA	GO:0005759//mitochondrial matrix;GO:0009535//chloroplast thylakoid membrane;GO:0005739//mitochondrion	GO:0046872//metal ion binding;GO:0004222//metalloendopeptidase activity	GO:0006627//protein processing involved in protein targeting to mitochondrion;GO:0006518//peptide metabolic process	K01410//mitochondrial intermediate peptidase [EC:3.4.24.59]	KRH62580.1//hypothetical protein GLYMA_04G117400 [Glycine max];XP_017425274.1//PREDICTED: probable mitochondrial intermediate peptidase, mitochondrial isoform X3 [Vigna angularis];XP_007148694.1//hypothetical protein PHAVU_005G006700g [Phaseolus vulgaris];XP_003523867.2//PREDICTED: probable mitochondrial intermediate peptidase, mitochondrial [Glycine max];KRH62582.1//hypothetical protein GLYMA_04…
BGI_novel_G000740	-1.79539	Down	NA	NA	NA	NA	NA	GO:0016301//kinase activity;GO:0016773//phosphotransferase activity, alcohol group as acceptor	NA	K17279//receptor expression-enhancing protein 5/6	XP_019424505.1//PREDICTED: uncharacterized protein LOC109333467 [Lupinus angustifolius]
Maker00013009	-1.60175	Down	2.94892	Up	1.19889	Up	NA	GO:0003677//DNA binding	NA	K09422//transcription factor MYB, plant	XP_014491740.1//PREDICTED: transcription factor MYB39-like [Vigna radiata var. radiata]
Maker00003079	3.00507	Up	-4.41348	Down	NA	NA	NA	GO:0046872//metal ion binding;GO:0045544//gibberellin 20-oxidase activity;GO:0016491//oxidoreductase activity	GO:0009908//flower development;GO:0009826//unidimensional cell growth;GO:0009416//response to light stimulus;GO:0009686//gibberellin biosynthetic process;GO:0009740//gibberellic acid mediated signaling pathway	K05282//gibberellin 20-oxidase [EC:1.14.11.12]	XP_007152362.1//hypothetical protein PHAVU_004G123600g [Phaseolus vulgaris]
Maker00010147	1.53256	Up	-4.59432	Down	-3.03045	Down	GO:0005622//intracellular	NA	GO:0000160//phosphorelay signal transduction system	K14492//two-component response regulator ARR-A family	AFK43691.1//unknown [Lotus japonicus]
Maker00021785	1.42453	Up	-4.30969	Down	-2.84792	Down	NA	NA	NA	NA	XP_015973000.1//uncharacterized protein LOC107496290 [Arachis duranensis];XP_019435665.1//PREDICTED: uncharacterized protein LOC109342106 [Lupinus angustifolius]
BGI_novel_G003127	-2.23015	Down	NA	NA	-5.49271	Down	NA	GO:0008061//chitin binding;GO:0004568//chitinase activity	GO:0006032//chitin catabolic process;GO:0016998//cell wall macromolecule catabolic process;GO:0005975//carbohydrate metabolic process	K20547//basic endochitinase B [EC:3.2.1.14]	XP_020237672.1//endochitinase CH5B [Cajanus cajan]
Maker00022777	-1.0351	Down	-1.77079	Down	-2.78355	Down	GO:0005634//nucleus	NA	NA	K18810//cyclin D1/2/4, plant	XP_020218284.1//cyclin-D1-1 [Cajanus cajan]
Maker00000491	2.59027	Up	-3.82176	Down	NA	NA	NA	NA	NA	NA	XP_015935683.1//fasciclin-like arabinogalactan protein 1 [Arachis duranensis];XP_016173804.1//fasciclin-like arabinogalactan protein 1 [Arachis ipaensis];XP_014523244.1//PREDICTED: fasciclin-like arabinogalactan protein 1 [Vigna radiata var. radiata]
Maker00012379	1.82191	Up	-3.73921	Down	-1.80425	Down	GO:0016021//integral component of membrane;GO:0005886//plasma membrane	GO:0051536//iron-sulfur cluster binding	NA	K11855//ubiquitin carboxyl-terminal hydrolase 36/42 [EC:3.4.19.12];K11000//callose synthase [EC:2.4.1.-]	XP_013443594.1//CASP POPTRDRAFT-like protein [Medicago truncatula]
Maker00000767	1.33579	Up	NA	NA	1.72824	Up	NA	NA	NA	K00688//glycogen phosphorylase [EC:2.4.1.1]	XP_019417421.1//PREDICTED: ACT domain-containing protein ACR3 [Lupinus angustifolius]
Maker00020523	-1.09069	Down	-1.23692	Down	-2.31207	Down	GO:0005634//nucleus	GO:0043565//sequence-specific DNA binding;GO:0003700//DNA binding transcription factor activity	NA	K09338//homeobox-leucine zipper protein	KOM56384.1//hypothetical protein LR48_Vigan10g227600 [Vigna angularis]
BGI_novel_G001117	-1.33487	Down	NA	NA	NA	NA	GO:0009570//chloroplast stroma	GO:0004252//serine-type endopeptidase activity	NA	K01358//ATP-dependent Clp protease, protease subunit [EC:3.4.21.92]	YP_009176028.1//clp protease proteolytic subunit (chloroplast) [Ficus racemosa]
Maker00008917	1.81863	Up	NA	NA	NA	NA	GO:0016021//integral component of membrane;GO:0005886//plasma membrane	NA	GO:0008643//carbohydrate transport	K15382//solute carrier family 50 (sugar transporter)	XP_017419902.1//PREDICTED: bidirectional sugar transporter SWEET10-like [Vigna angularis]
BGI_novel_G002193	2.21621	Up	NA	NA	3.83915	Up	NA	GO:0016758//transferase activity, transferring hexosyl groups	GO:0008152//metabolic process	K21374//7-deoxyloganetin glucosyltransferase [EC:2.4.1.324]	XP_007148403.1//hypothetical protein PHAVU_006G205600g [Phaseolus vulgaris]
Maker00020067	1.52116	Up	-1.32674	Down	NA	NA	NA	NA	NA	K03063//26S proteasome regulatory subunit T3	XP_015940375.1//BTB/POZ domain-containing protein At5g47800 isoform X2 [Arachis duranensis];XP_016195992.1//BTB/POZ domain-containing protein At5g47800 isoform X2 [Arachis ipaensis]
Maker00013140	2.06265	Up	-4.68569	Down	-2.54235	Down	NA	GO:0016757//transferase activity, transferring glycosyl groups	GO:0006486//protein glycosylation	K20889//probable glucuronoxylan glucuronosyltransferase IRX7 [EC2.4.1.-]	BAT90509.1//hypothetical protein VIGAN_06176500 [Vigna angularis var. angularis];XP_014494609.1//PREDICTED: probable glucuronoxylan glucuronosyltransferase IRX7 [Vigna radiata var. radiata]
Maker00001734	2.32044	Up	-6.64933	Down	-3.5178	Down	NA	NA	NA	K01179//endoglucanase [EC:3.2.1.4]	XP_019457114.1//PREDICTED: endoglucanase 11-like [Lupinus angustifolius]
Maker00004381	-1.15074	Down	NA	NA	NA	NA	GO:0016021//integral component of membrane	GO:0015238//drug transmembrane transporter activity;GO:0015297//antiporter activity	GO:0006855//drug transmembrane transport	K03327//multidrug resistance protein, MATE family	XP_015942052.1//protein DETOXIFICATION 12 [Arachis duranensis]
Maker00004505	1.54423	Up	-3.00003	Down	NA	NA	NA	NA	NA	K03006//DNA-directed RNA polymerase II subunit RPB1 [EC:2.7.7.6];K21952//CASK-interacting protein	XP_017441497.1//PREDICTED: lysine-rich arabinogalactan protein 18-like [Vigna angularis]
Maker00022043	-1.28896	Down	1.83525	Up	NA	NA	NA	NA	NA	K14861//nucleolar pre-ribosomal-associated protein 1	XP_019455734.1//PREDICTED: uncharacterized protein LOC109356706 isoform X1 [Lupinus angustifolius];XP_020230562.1//uncharacterized protein LOC109811280 isoform X2 [Cajanus cajan]
Maker00022270	-1.72554	Down	2.38328	Up	NA	NA	NA	NA	NA	NA	XP_019460329.1//PREDICTED: BON1-associated protein 2-like [Lupinus angustifolius]
Maker00004096	1.00999	Up	2.43183	Up	3.48118	Up	GO:0005634//nucleus	GO:0003677//DNA binding;GO:0000981//RNA polymerase II transcription factor activity, sequence-specific DNA binding;GO:0043565//sequence-specific DNA binding;GO:0044212//transcription regulatory region DNA binding;GO:0001135//transcription factor activity, RNA polymerase II transcription factor recruiting	GO:0006357//regulation of transcription from RNA polymerase II promoter;GO:0030154//cell differentiation	K09422//transcription factor MYB, plant	XP_019448660.1//PREDICTED: transcription factor MYB59-like isoform X1 [Lupinus angustifolius];XP_019076057.1//PREDICTED: transcription factor MYB59 [Vitis vinifera]
Maker00019292	1.8598	Up	-3.18191	Down	NA	NA	NA	GO:0003824//catalytic activity;GO:0050662//coenzyme binding	NA	K08695//anthocyanidin reductase [EC:1.3.1.77]	XP_015886147.1//PREDICTED: anthocyanidin reductase [Ziziphus jujuba];AEL79860.1//anthocyanidin reductase [Malus domestica]
Maker00007226	1.12348	Up	NA	NA	1.69469	Up	NA	GO:0016620//oxidoreductase activity, acting on the aldehyde or oxo group of donors, NAD or NADP as acceptor;GO:0050661//NADP binding;GO:0051287//NAD binding	GO:0006006//glucose metabolic process	K05298//glyceraldehyde-3-phosphate dehydrogenase (NADP+) (phosphorylating) [EC:1.2.1.13]	NP_001238484.2//glyceraldehyde-3-phosphate dehydrogenase A subunit [Glycine max];XP_019427588.1//PREDICTED: glyceraldehyde-3-phosphate dehydrogenase A, chloroplastic-like [Lupinus angustifolius]
BGI_novel_G000180	2.15499	Up	-6.2959	Down	-3.66527	Down	NA	GO:0004252//serine-type endopeptidase activity	NA	K12619//5'-3' exoribonuclease 2 [EC:3.1.13.-];K13199//plasminogen activator inhibitor 1 RNA-binding protein;K15333//tRNA guanosine-2'-O-methyltransferase [EC:2.1.1.34];K14568//rRNA small subunit pseudouridine methyltransferase Nep1 [EC:2.1.1.260]	XP_015962086.1//subtilisin-like protease Glyma18g48580 [Arachis duranensis]
Maker00005512	-2.21377	Down	2.29999	Up	NA	NA	NA	NA	NA	NA	XP_020202907.1//uncharacterized protein LOC109788566 [Cajanus cajan];XP_019427011.1//PREDICTED: uncharacterized protein LOC109335326 [Lupinus angustifolius]
Maker00023727	1.76982	Up	NA	NA	NA	NA	GO:0048046//apoplast;GO:0005618//cell wall	GO:0016762//xyloglucan:xyloglucosyl transferase activity;GO:0004553//hydrolase activity, hydrolyzing O-glycosyl compounds	GO:0010411//xyloglucan metabolic process;GO:0042546//cell wall biogenesis;GO:0071555//cell wall organization	K08235//xyloglucan:xyloglucosyl transferase [EC:2.4.1.207]	XP_003555312.1//PREDICTED: probable xyloglucan endotransglucosylase/hydrolase protein 10 [Glycine max];XP_019427252.1//PREDICTED: probable xyloglucan endotransglucosylase/hydrolase protein 10 [Lupinus angustifolius]
Maker00010908	-2.38803	Down	NA	NA	-5.44999	Down	GO:0005886//plasma membrane	GO:0043531//ADP binding	GO:0007165//signal transduction;GO:0006952//defense response	K13459//disease resistance protein RPS2	XP_015943669.1//probable disease resistance protein At4g27220 [Arachis duranensis]
Maker00008148	1.3468	Up	-4.11917	Down	-2.627	Down	NA	NA	NA	K17964//leucine-rich PPR motif-containing protein, mitochondrial	KRH60501.1//hypothetical protein GLYMA_05G244200 [Glycine max]
BGI_novel_G000065	-2.06295	Down	3.76694	Up	NA	NA	GO:0016020//membrane	GO:0016709//oxidoreductase activity, acting on paired donors, with incorporation or reduction of molecular oxygen, NAD(P)H as one donor, and incorporation of one atom of oxygen;GO:0020037//heme binding;GO:0005506//iron ion binding	GO:0044550//secondary metabolite biosynthetic process	K20617//cytochrome P450 family 71 subfamily A	CBI19823.3//unnamed protein product, partial [Vitis vinifera]
Maker00001201	1.74221	Up	-4.27593	Down	NA	NA	GO:0009707//chloroplast outer membrane	NA	GO:0009658//chloroplast organization	K05747//Wiskott-Aldrich syndrome protein	XP_003544301.2//PREDICTED: protein CHUP1, chloroplastic-like isoform X1 [Glycine max]
BGI_novel_G001355	1.18969	Up	NA	NA	NA	NA	NA	NA	NA	K18195//rhamnogalacturonan endolyase [EC:4.2.2.23];K22048//mechanosensitive ion channel protein 4/5/6/7/8/9/10	OMO94467.1//reverse transcriptase [Corchorus capsularis]
Maker00004471	1.12377	Up	NA	NA	NA	NA	NA	GO:0016722//oxidoreductase activity, oxidizing metal ions;GO:0005507//copper ion binding;GO:0016491//oxidoreductase activity	NA	K05909//laccase [EC:1.10.3.2]	XP_003555951.1//PREDICTED: multicopper oxidase LPR2-like isoform X1 [Glycine max]
Maker00019026	2.00694	Up	-3.22459	Down	NA	NA	NA	NA	NA	NA	XP_019463862.1//PREDICTED: uncharacterized protein LOC109362492 isoform X2 [Lupinus angustifolius];OIW00343.1//hypothetical protein TanjilG_27594 [Lupinus angustifolius];XP_019464316.1//PREDICTED: uncharacterized protein LOC109362753 [Lupinus angustifolius]
Maker00004675	1.95737	Up	-4.35938	Down	-2.40994	Down	GO:0016021//integral component of membrane	NA	GO:0045492//xylan biosynthetic process	K18801//glucuronoxylan 4-O-methyltransferase [EC:2.1.1.112]	XP_003517315.1//PREDICTED: protein IRREGULAR XYLEM 15-like [Glycine max]
Maker00008941	1.85681	Up	NA	NA	NA	NA	GO:0005634//nucleus	GO:0043565//sequence-specific DNA binding;GO:0046982//protein heterodimerization activity	GO:0006355//regulation of transcription, DNA-templated	K08065//nuclear transcription Y subunit beta	XP_007159754.1//hypothetical protein PHAVU_002G264300g [Phaseolus vulgaris]
BGI_novel_G002339	1.24038	Up	NA	NA	NA	NA	NA	NA	NA	K01513//ectonucleotide pyrophosphatase/phosphodiesterase family member 1/3 [EC:3.1.4.1 3.6.1.9]	XP_003521351.1//PREDICTED: uncharacterized protein LOC100808933 [Glycine max]
Maker00012768	-2.57176	Down	3.43161	Up	NA	NA	NA	GO:0004866//endopeptidase inhibitor activity	NA	NA	XP_004488980.1//PREDICTED: alpha-amylase/subtilisin inhibitor-like [Cicer arietinum]
Maker00012674	1.53648	Up	NA	NA	1.33304	Up	GO:0016021//integral component of membrane	NA	NA	K15503//serine/threonine-protein phosphatase 6 regulatory ankyrin repeat subunit B;K15502//serine/threonine-protein phosphatase 6 regulatory ankyrin repeat subunit A	XP_019077531.1//PREDICTED: ankyrin repeat-containing protein At5g02620-like isoform X3 [Vitis vinifera];XP_007147982.1//hypothetical protein PHAVU_006G170700g [Phaseolus vulgaris];EYU40899.1//hypothetical protein MIMGU_mgv1a020415mg [Erythranthe guttata];KOM53636.1//hypothetical protein LR48_Vigan09g229500 [Vigna angularis]
Maker00009406	-3.81332	Down	NA	NA	-5.78343	Down	NA	NA	NA	K13420//LRR receptor-like serine/threonine-protein kinase FLS2 [EC:2.7.11.1]	XP_004513070.1//PREDICTED: leucine-rich repeat extensin-like protein 6 [Cicer arietinum]
Maker00018784	1.76807	Up	NA	NA	NA	NA	GO:0016021//integral component of membrane	GO:0004040//amidase activity	NA	K02433//aspartyl-tRNA(Asn)/glutamyl-tRNA(Gln) amidotransferase subunit A [EC:6.3.5.6 6.3.5.7]	XP_020203971.1//fatty acid amide hydrolase-like isoform X1 [Cajanus cajan];XP_020203972.1//fatty acid amide hydrolase-like isoform X2 [Cajanus cajan]
Maker00007704	1.11181	Up	NA	NA	NA	NA	GO:0005576//extracellular region	GO:0004650//polygalacturonase activity	GO:0005975//carbohydrate metabolic process;GO:0071555//cell wall organization	K01184//polygalacturonase [EC:3.2.1.15];K01213//galacturan 1,4-alpha-galacturonidase [EC:3.2.1.67]	KYP71721.1//putative polygalacturonase [Cajanus cajan];XP_020213176.1//probable polygalacturonase isoform X2 [Cajanus cajan]
Maker00010898	2.01216	Up	-2.57177	Down	NA	NA	GO:0005794//Golgi apparatus;GO:0016021//integral component of membrane;GO:0005886//plasma membrane	GO:0016760//cellulose synthase (UDP-forming) activity;GO:0046872//metal ion binding;GO:0016759//cellulose synthase activity	GO:0009833//plant-type primary cell wall biogenesis;GO:0030244//cellulose biosynthetic process;GO:0071555//cell wall organization	K10999//cellulose synthase A [EC:2.4.1.12]	XP_020238299.1//cellulose synthase A catalytic subunit 4 [UDP-forming]-like [Cajanus cajan]
Maker00019122	1.73751	Up	-2.51549	Down	NA	NA	NA	NA	NA	K18726//FAS-associated factor 2	XP_020213049.1//plant UBX domain-containing protein 10-like [Cajanus cajan];XP_014490585.1//PREDICTED: plant UBX domain-containing protein 10-like [Vigna radiata var. radiata]
Maker00004362	1.33194	Up	-2.34192	Down	NA	NA	NA	GO:0008234//cysteine-type peptidase activity	NA	K01365//cathepsin L [EC:3.4.22.15]	KHN12823.1//Cysteine proteinase RD21a [Glycine soja]
Maker00024405	1.1333	Up	NA	NA	1.46685	Up	NA	NA	NA	NA	XP_020989284.1//protein LNK3 isoform X2 [Arachis duranensis];XP_014492667.1//PREDICTED: uncharacterized protein LOC106755083 isoform X2 [Vigna radiata var. radiata];XP_020202488.1//protein LNK3-like [Cajanus cajan]
Maker00007358	1.14883	Up	NA	NA	1.8572	Up	GO:0016021//integral component of membrane	GO:0015079//potassium ion transmembrane transporter activity	NA	K03549//KUP system potassium uptake protein	BAO45900.1//potassium transporter [Acacia mangium]
Maker00009779	1.16078	Up	-1.55839	Down	NA	NA	GO:0016021//integral component of membrane	GO:0004674//protein serine/threonine kinase activity;GO:0005524//ATP binding	NA	K20718//LRR receptor-like serine/threonine-protein kinase ERECTA [EC:2.7.11.1]	XP_020234273.1//LRR receptor-like serine/threonine-protein kinase ERECTA [Cajanus cajan];KHN37058.1//LRR receptor-like serine/threonine-protein kinase ERECTA [Glycine soja]
BGI_novel_G001260	4.65655	Up	-5.91892	Down	NA	NA	NA	NA	NA	K13993//HSP20 family protein	XP_015931443.1//17.3 kDa class I heat shock protein [Arachis duranensis]
Maker00011227	2.24485	Up	-5.87994	Down	-2.64225	Down	NA	GO:0004866//endopeptidase inhibitor activity	NA	NA	KHN04363.1//Trypsin inhibitor A [Glycine soja]
BGI_novel_G002188	1.89822	Up	NA	NA	NA	NA	NA	NA	NA	NA	XP_019422834.1//PREDICTED: metacaspase-3-like isoform X1 [Lupinus angustifolius]
Maker00014676	1.76305	Up	-2.38906	Down	NA	NA	GO:0016021//integral component of membrane	GO:0016787//hydrolase activity;GO:0003824//catalytic activity	NA	NA	XP_020228405.1//uncharacterized protein LOC109809485 [Cajanus cajan]
Maker00002329	1.33937	Up	NA	NA	1.75799	Up	NA	GO:0016788//hydrolase activity, acting on ester bonds	NA	K01510//apyrase [EC:3.6.1.5]	AFK45991.1//unknown [Lotus japonicus];XP_021622536.1//uncharacterized protein LOC110622358 [Manihot esculenta]
Maker00013968	2.11387	Up	-3.15786	Down	NA	NA	GO:0016021//integral component of membrane	NA	NA	NA	XP_015883283.1//PREDICTED: CRIB domain-containing protein RIC10 [Ziziphus jujuba]
Maker00018998	1.47071	Up	NA	NA	1.6198	Up	GO:0005634//nucleus	GO:0003677//DNA binding	GO:0006355//regulation of transcription, DNA-templated;GO:0006351//transcription, DNA-templated	K08869//aarF domain-containing kinase;K17613//calcineurin-binding protein cabin-1	XP_007155372.1//hypothetical protein PHAVU_003G195700g [Phaseolus vulgaris]
Maker00014028	1.54968	Up	NA	NA	NA	NA	NA	NA	NA	NA	XP_016186976.1//uncharacterized protein LOC107628868 [Arachis ipaensis]
Maker00005862	1.23216	Up	NA	NA	NA	NA	NA	GO:0005524//ATP binding;GO:0004672//protein kinase activity	NA	K08819//cyclin-dependent kinase 12/13 [EC:2.7.11.22 2.7.11.23];K04515//calcium/calmodulin-dependent protein kinase (CaM kinase) II [EC:2.7.11.17];K08794//calcium/calmodulin-dependent protein kinase I [EC:2.7.11.17];K08789//microtubule-associated serine/threonine kinase [EC:2.7.11.1]	XP_020205103.1//serine/threonine-protein kinase STN8, chloroplastic-like [Cajanus cajan]
Maker00019726	1.95219	Up	-2.41047	Down	NA	NA	GO:0016021//integral component of membrane	GO:0004553//hydrolase activity, hydrolyzing O-glycosyl compounds	GO:0005975//carbohydrate metabolic process	K05349//beta-glucosidase [EC:3.2.1.21]	XP_007147489.1//hypothetical protein PHAVU_006G128800g [Phaseolus vulgaris];KYP38477.1//Lysosomal beta glucosidase [Cajanus cajan]
Maker00012885	3.19511	Up	NA	NA	NA	NA	GO:0016020//membrane;GO:0005618//cell wall;GO:0005576//extracellular region	NA	GO:0009664//plant-type cell wall organization	K20628//expansin	NP_001242978.1//expansin-A4-like precursor [Glycine max]
Maker00005098	-1.06797	Down	NA	NA	NA	NA	GO:0005737//cytoplasm	GO:0046914//transition metal ion binding	GO:0030001//metal ion transport;GO:0046916//cellular transition metal ion homeostasis	K09486//hypoxia up-regulated 1	XP_021683415.1//heavy metal-associated isoprenylated plant protein 39-like [Hevea brasiliensis];NP_001236802.1//uncharacterized protein LOC100305540 [Glycine max]
Maker00009951	1.8199	Up	-4.47735	Down	-2.45098	Down	GO:0016021//integral component of membrane	GO:0008270//zinc ion binding	NA	K15407//queuine tRNA-ribosyltransferase subunit QTRTD1 [EC:2.4.2.29]	XP_020233779.1//uncharacterized protein LOC109813901 [Cajanus cajan]
Maker00014744	-3.2359	Down	NA	NA	-2.36826	Down	GO:0005739//mitochondrion	GO:0004124//cysteine synthase activity;GO:0016740//transferase activity;GO:0050017//L-3-cyanoalanine synthase activity	GO:0006535//cysteine biosynthetic process from serine;GO:0019499//cyanide metabolic process	K13034//L-3-cyanoalanine synthase/ cysteine synthase [EC:2.5.1.47 4.4.1.9]	AFK37031.1//unknown [Lotus japonicus];XP_020219483.1//bifunctional L-3-cyanoalanine synthase/cysteine synthase 1, mitochondrial [Cajanus cajan]
Maker00009246	-1.0369	Down	NA	NA	-1.32239	Down	GO:0005840//ribosome	GO:0003735//structural constituent of ribosome	GO:0006412//translation	K02957//small subunit ribosomal protein S15Ae	XP_014505890.1//PREDICTED: 40S ribosomal protein S15a [Vigna radiata var. radiata];XP_007154165.1//hypothetical protein PHAVU_003G095800g [Phaseolus vulgaris]
Maker00020641	2.80626	Up	-2.3042	Down	NA	NA	GO:0016021//integral component of membrane	GO:0005524//ATP binding;GO:0004672//protein kinase activity	NA	K13420//LRR receptor-like serine/threonine-protein kinase FLS2 [EC:2.7.11.1]	XP_020232054.1//probable LRR receptor-like serine/threonine-protein kinase At1g14390 [Cajanus cajan]
Maker00021317	-1.69846	Down	NA	NA	-3.99262	Down	GO:0009506//plasmodesma;GO:0005622//intracellular	GO:0004871//signal transducer activity	GO:0019722//calcium-mediated signaling	NA	XP_019416599.1//PREDICTED: uncharacterized protein LOC109327880 [Lupinus angustifolius]
Maker00004124	2.1166	Up	-6.76486	Down	-3.69466	Down	NA	NA	NA	K14411//RNA-binding protein Musashi	XP_003543221.2//PREDICTED: protein IQ-DOMAIN 1-like isoform X2 [Glycine max]
Maker00021296	2.00637	Up	NA	NA	NA	NA	NA	GO:0046983//protein dimerization activity	NA	K16189//phytochrome-interacting factor 4;K12126//phytochrome-interacting factor 3	XP_015571977.1//PREDICTED: transcription factor PIF7 isoform X1 [Ricinus communis]
Maker00023045	-2.80737	Down	NA	NA	-2.76581	Down	NA	NA	NA	K06699//proteasome activator subunit 4;K12472//epidermal growth factor receptor substrate 15	KYP66166.1//putative polygalacturonase non-catalytic subunit JP650 family [Cajanus cajan]
Maker00009414	1.57596	Up	NA	NA	1.36806	Up	NA	NA	NA	K19366//spartin	XP_020215830.1//senescence/dehydration-associated protein At4g35985, chloroplastic-like [Cajanus cajan]
BGI_novel_G001476	1.06223	Up	NA	NA	NA	NA	NA	NA	NA	K19041//E3 ubiquitin-protein ligase RNF38/44 [EC:2.3.2.27]	XP_019449975.1//PREDICTED: E3 ubiquitin-protein ligase DZIP3-like isoform X1 [Lupinus angustifolius]
Maker00015874	2.07803	Up	-2.59262	Down	NA	NA	NA	NA	NA	NA	NA
Maker00002205	2.2645	Up	-5.63329	Down	NA	NA	GO:0048046//apoplast	GO:0016722//oxidoreductase activity, oxidizing metal ions;GO:0052716//hydroquinone:oxygen oxidoreductase activity;GO:0005507//copper ion binding	GO:0046274//lignin catabolic process	K05909//laccase [EC:1.10.3.2]	XP_019450239.1//PREDICTED: laccase-17-like [Lupinus angustifolius]
Maker00017541	-1.77287	Down	4.43356	Up	2.51725	Up	GO:0005634//nucleus	GO:0000981//RNA polymerase II transcription factor activity, sequence-specific DNA binding;GO:0043565//sequence-specific DNA binding;GO:0044212//transcription regulatory region DNA binding;GO:0001135//transcription factor activity, RNA polymerase II transcription factor recruiting	GO:0006357//regulation of transcription from RNA polymerase II promoter;GO:0030154//cell differentiation	K09422//transcription factor MYB, plant	XP_020228609.1//transcription factor MYB108-like isoform X1 [Cajanus cajan];XP_003536859.1//PREDICTED: transcription factor MYB108 [Glycine max]
Maker00005009	1.25745	Up	-1.05603	Down	NA	NA	GO:0005886//plasma membrane	GO:0004674//protein serine/threonine kinase activity;GO:0004715//non-membrane spanning protein tyrosine kinase activity;GO:0005524//ATP binding;GO:0004675//transmembrane receptor protein serine/threonine kinase activity	GO:0006468//protein phosphorylation;GO:0007166//cell surface receptor signaling pathway	K04733//interleukin-1 receptor-associated kinase 4 [EC:2.7.11.1]	XP_017407485.1//PREDICTED: PTI1-like tyrosine-protein kinase At3g15890 [Vigna angularis];XP_020226707.1//PTI1-like tyrosine-protein kinase At3g15890 [Cajanus cajan]
Maker00020178	1.80818	Up	-1.64469	Down	NA	NA	NA	GO:0008017//microtubule binding	GO:0007010//cytoskeleton organization	K10352//myosin heavy chain;K17388//Rho-associated protein kinase 2 [EC:2.7.11.1];K20283//golgin subfamily A member 4;K22733;K09291//nucleoprotein TPR;K10400//kinesin family member 15;K20478//golgin subfamily B member 1	KHN40802.1//Microtubule-associated protein 70-5 [Glycine soja];XP_020230647.1//microtubule-associated protein 70-5-like [Cajanus cajan]
Maker00006952	1.46505	Up	-1.87193	Down	NA	NA	GO:0016021//integral component of membrane	NA	NA	K12486//stromal membrane-associated protein;K04733//interleukin-1 receptor-associated kinase 4 [EC:2.7.11.1];K00549//5-methyltetrahydropteroyltriglutamate--homocysteine methyltransferase [EC:2.1.1.14]	XP_016183626.1//FT-interacting protein 1 [Arachis ipaensis]
Maker00000124	1.34619	Up	-1.90447	Down	NA	NA	NA	GO:0004553//hydrolase activity, hydrolyzing O-glycosyl compounds;GO:0016985//mannan endo-1,4-beta-mannosidase activity	GO:0046355//mannan catabolic process;GO:0005975//carbohydrate metabolic process	K19355//mannan endo-1,4-beta-mannosidase [EC:3.2.1.78]	XP_020218559.1//mannan endo-1,4-beta-mannosidase 7-like [Cajanus cajan]
Maker00002207	1.21683	Up	1.33352	Up	2.56123	Up	NA	NA	GO:0006950//response to stress	NA	KHN15657.1//Universal stress protein A-like protein [Glycine soja]
Maker00010971	-1.17954	Down	NA	NA	NA	NA	GO:0005737//cytoplasm	GO:0000287//magnesium ion binding;GO:0003879//ATP phosphoribosyltransferase activity	GO:0000105//histidine biosynthetic process	K00765//ATP phosphoribosyltransferase [EC:2.4.2.17]	XP_020221579.1//ATP phosphoribosyltransferase 2, chloroplastic-like [Cajanus cajan]
Maker00002653	1.64398	Up	-2.15966	Down	NA	NA	NA	NA	NA	K03006//DNA-directed RNA polymerase II subunit RPB1 [EC:2.7.7.6];K00430//peroxidase [EC:1.11.1.7];K21952//CASK-interacting protein	XP_003518824.1//PREDICTED: lysine-rich arabinogalactan protein 19-like [Glycine max]
BGI_novel_G000721	1.18506	Up	NA	NA	NA	NA	NA	NA	NA	K17362//acyl-coenzyme A thioesterase 13 [EC:3.1.2.-]	XP_019456221.1//PREDICTED: uncharacterized protein LOC109357001 [Lupinus angustifolius]
Maker00002812	-2.41771	Down	NA	NA	-1.6384	Down	NA	NA	NA	NA	XP_014618325.1//PREDICTED: uncharacterized protein LOC100806447 [Glycine max]
Maker00005442	1.59805	Up	-3.01934	Down	NA	NA	GO:0016020//membrane;GO:0016021//integral component of membrane	GO:0008375//acetylglucosaminyltransferase activity	NA	K20891//beta-glucuronosyltransferase [EC:2.4.1.-];K00771//protein xylosyltransferase [EC:2.4.2.26]	AMQ26130.1//UDP-glycosyltransferase 23 [Pueraria montana var. lobata]
Maker00024427	1.1818	Up	-3.29405	Down	-2.02796	Down	GO:0016021//integral component of membrane	GO:0005524//ATP binding;GO:0016887//ATPase activity	GO:0006810//transport	K05681//ATP-binding cassette, subfamily G (WHITE), member 2;K21396//ATP-binding cassette, subfamily G (WHITE), eye pigment precursor transporter	XP_013469402.1//drug resistance transporter-like ABC domain protein [Medicago truncatula]
Maker00018478	-3.0994	Down	2.70705	Up	NA	NA	GO:0016021//integral component of membrane;GO:0005886//plasma membrane	GO:0022857//transmembrane transporter activity	GO:0006810//transport	K17500//integrin-linked kinase-associated serine/threonine phosphatase 2C [EC:3.1.3.16]	XP_003593114.1//auxin-induced 5NG4-like protein [Medicago truncatula];KHN33486.1//Auxin-induced protein 5NG4-like protein [Glycine soja]
Maker00013857	1.71419	Up	-3.5483	Down	NA	NA	NA	GO:0003824//catalytic activity	GO:0008152//metabolic process	K01897//long-chain acyl-CoA synthetase [EC:6.2.1.3]	XP_020988108.1//long chain acyl-CoA synthetase 2 isoform X2 [Arachis duranensis];XP_003540684.1//PREDICTED: long chain acyl-CoA synthetase 2-like isoform X1 [Glycine max]
Maker00004758	2.31772	Up	-4.4124	Down	NA	NA	NA	GO:0005507//copper ion binding;GO:0016491//oxidoreductase activity	NA	NA	XP_004496968.1//PREDICTED: multicopper oxidase LPR2-like [Cicer arietinum]
Maker00023511	1.81767	Up	-3.61026	Down	-1.5826	Down	NA	NA	NA	K16296//serine carboxypeptidase-like clade I [EC:3.4.16.-]	XP_020986940.1//serine carboxypeptidase-like 18 isoform X1 [Arachis duranensis]
Maker00008578	1.97353	Up	-1.93617	Down	NA	NA	NA	GO:0030247//polysaccharide binding	NA	K04733//interleukin-1 receptor-associated kinase 4 [EC:2.7.11.1]	XP_019464021.1//PREDICTED: uncharacterized protein LOC109362587 isoform X2 [Lupinus angustifolius]
Maker00021422	3.39393	Up	-5.54634	Down	NA	NA	NA	NA	NA	K01184//polygalacturonase [EC:3.2.1.15];K11855//ubiquitin carboxyl-terminal hydrolase 36/42 [EC:3.4.19.12];K21952//CASK-interacting protein	XP_018826794.1//PREDICTED: 36.4 kDa proline-rich protein isoform X1 [Juglans regia]
Maker00017341	-1.12178	Down	2.57282	Up	1.44285	Up	GO:0005634//nucleus	GO:0003677//DNA binding	GO:0006355//regulation of transcription, DNA-templated;GO:0006351//transcription, DNA-templated	K12862//pleiotropic regulator 1;K13126//polyadenylate-binding protein;K00521//ferric-chelate reductase [EC:1.16.1.7];K16296//serine carboxypeptidase-like clade I [EC:3.4.16.-]	XP_014491354.1//PREDICTED: NAC transcription factor 29-like [Vigna radiata var. radiata]
Maker00000988	1.397	Up	NA	NA	NA	NA	NA	NA	NA	NA	XP_019416536.1//PREDICTED: uncharacterized protein LOC109327824 [Lupinus angustifolius]
Maker00005214	-2.09436	Down	-1.09571	Down	-3.23828	Down	NA	GO:0004252//serine-type endopeptidase activity	NA	K12619//5'-3' exoribonuclease 2 [EC:3.1.13.-];K13199//plasminogen activator inhibitor 1 RNA-binding protein;K15333//tRNA guanosine-2'-O-methyltransferase [EC:2.1.1.34];K14568//rRNA small subunit pseudouridine methyltransferase Nep1 [EC:2.1.1.260]	XP_016186183.1//subtilisin-like protease SBT4.14 isoform X2 [Arachis ipaensis]
Maker00015883	1.33736	Up	NA	NA	NA	NA	GO:0005634//nucleus	NA	GO:0006355//regulation of transcription, DNA-templated;GO:0009734//auxin-activated signaling pathway;GO:0006351//transcription, DNA-templated	K14484//auxin-responsive protein IAA	XP_021607004.1//auxin-responsive protein IAA13-like [Manihot esculenta];XP_018820112.1//PREDICTED: auxin-responsive protein IAA13-like isoform X1 [Juglans regia]
Maker00021355	2.78096	Up	-3.26121	Down	NA	NA	GO:0016021//integral component of membrane	NA	NA	NA	KHN14131.1//hypothetical protein glysoja_048433 [Glycine soja]
Maker00007193	1.28566	Up	NA	NA	1.79923	Up	GO:0016021//integral component of membrane	NA	NA	K04077//chaperonin GroEL	XP_012468130.1//PREDICTED: protein YLS9-like [Gossypium raimondii]
Maker00013041	-1.39987	Down	-2.56513	Down	-3.8667	Down	GO:0016021//integral component of membrane	GO:0005215//transporter activity	NA	K09873//aquaporin TIP	XP_021278380.1//probable aquaporin TIP1-2 [Herrania umbratica]
Maker00013048	3.29919	Up	-4.00764	Down	NA	NA	NA	NA	NA	NA	XP_017982915.1//PREDICTED: protein FAF-like, chloroplastic isoform X1 [Theobroma cacao]
Maker00012862	1.57744	Up	NA	NA	NA	NA	NA	NA	NA	K04733//interleukin-1 receptor-associated kinase 4 [EC:2.7.11.1]	OIV92454.1//hypothetical protein TanjilG_02217 [Lupinus angustifolius]
Maker00016687	2.19823	Up	NA	NA	NA	NA	NA	GO:0051087//chaperone binding	NA	K09555//BCL2-associated athanogene 1	XP_002278599.2//PREDICTED: BAG family molecular chaperone regulator 4 [Vitis vinifera]
Maker00011969	2.73336	Up	-2.09586	Down	NA	NA	NA	GO:0016757//transferase activity, transferring glycosyl groups	NA	K20893//probable galacturonosyltransferase-like 1 [EC:2.4.1.-]	XP_017426793.1//PREDICTED: probable galacturonosyltransferase-like 1 [Vigna angularis]
Maker00007791	-1.29268	Down	1.99282	Up	NA	NA	NA	GO:0008422//beta-glucosidase activity;GO:0004553//hydrolase activity, hydrolyzing O-glycosyl compounds	GO:1901657//glycosyl compound metabolic process;GO:0005975//carbohydrate metabolic process	K01188//beta-glucosidase [EC:3.2.1.21]	XP_020235694.1//beta-glucosidase 11-like [Cajanus cajan]
Maker00021683	1.15867	Up	NA	NA	NA	NA	NA	GO:0046872//metal ion binding;GO:0004722//protein serine/threonine phosphatase activity	NA	K14803//protein phosphatase PTC2/3 [EC:3.1.3.16]	XP_004508403.1//PREDICTED: probable protein phosphatase 2C 27 [Cicer arietinum];OIV97264.1//hypothetical protein TanjilG_10798 [Lupinus angustifolius];XP_020228527.1//probable protein phosphatase 2C 27 [Cajanus cajan]
BGI_novel_G000908	1.76415	Up	-6.4824	Down	-4.06443	Down	GO:0016021//integral component of membrane	NA	NA	K19519//transforming growth factor-beta-induced protein	XP_016207929.1//fasciclin-like arabinogalactan protein 11 [Arachis ipaensis]
Maker00009374	1.60943	Up	-3.12497	Down	NA	NA	NA	NA	NA	K14595//abscisate beta-glucosyltransferase [EC:2.4.1.263]	AGV53046.1//UDP-glucose flavonoid glucosyl-transferase [Actinidia chinensis]
Maker00020244	1.5518	Up	-3.21437	Down	NA	NA	NA	GO:0004190//aspartic-type endopeptidase activity	NA	K22683	XP_019461953.1//PREDICTED: aspartyl protease family protein 2 [Lupinus angustifolius]
BGI_novel_G000612	-1.54635	Down	-2.07307	Down	-3.59799	Down	NA	NA	GO:0009817//defense response to fungus, incompatible interaction;GO:0009651//response to salt stress	K04733//interleukin-1 receptor-associated kinase 4 [EC:2.7.11.1]	NP_001235877.1//PR-5b protein precursor [Glycine max]
Maker00007676	1.76229	Up	-3.96865	Down	-2.10347	Down	GO:0016021//integral component of membrane	NA	GO:0055085//transmembrane transport;GO:0009734//auxin-activated signaling pathway	K13947//auxin efflux carrier family	XP_017417945.1//PREDICTED: auxin efflux carrier component 5 [Vigna angularis]
Maker00012357	-1.4077	Down	NA	NA	-1.46435	Down	NA	GO:0003824//catalytic activity;GO:0030170//pyridoxal phosphate binding	GO:0009058//biosynthetic process	K00652//8-amino-7-oxononanoate synthase [EC:2.3.1.47]	XP_003522881.1//PREDICTED: 8-amino-7-oxononanoate synthase-like isoform X1 [Glycine max];KHN37445.1//8-amino-7-oxononanoate synthase [Glycine soja]
BGI_novel_G002889	1.91862	Up	NA	NA	NA	NA	NA	NA	NA	K13993//HSP20 family protein	XP_004505087.1//PREDICTED: 18.5 kDa class I heat shock protein-like [Cicer arietinum]
Maker00011547	-1.34281	Down	NA	NA	NA	NA	GO:0016021//integral component of membrane	NA	NA	K04733//interleukin-1 receptor-associated kinase 4 [EC:2.7.11.1]	XP_015963607.1//thaumatin-like protein 1b [Arachis duranensis]
Maker00019732	1.83384	Up	-2.31388	Down	NA	NA	NA	NA	NA	K13993//HSP20 family protein;K18626//trichohyalin	XP_019431028.1//PREDICTED: protein RESTRICTED TEV MOVEMENT 2-like [Lupinus angustifolius]
Maker00003981	2.10933	Up	-2.71489	Down	NA	NA	GO:0005634//nucleus	GO:0003677//DNA binding	GO:0006355//regulation of transcription, DNA-templated;GO:0006351//transcription, DNA-templated	NA	XP_015936654.1//NAC transcription factor 56 [Arachis duranensis]
Maker00021594	2.05094	Up	-2.47813	Down	NA	NA	GO:0016021//integral component of membrane	GO:0004713//protein tyrosine kinase activity;GO:0005524//ATP binding;GO:0004672//protein kinase activity	NA	K00924//kinase [EC:2.7.1.-]	XP_020207733.1//leucine-rich repeat receptor-like protein kinase TDR [Cajanus cajan];XP_019415469.1//PREDICTED: leucine-rich repeat receptor-like protein kinase TDR [Lupinus angustifolius]
Maker00014973	1.46889	Up	-4.2412	Down	NA	NA	NA	NA	NA	NA	XP_015888705.1//PREDICTED: uncharacterized protein At4g00950 [Ziziphus jujuba]
Maker00016080	1.69566	Up	-2.60765	Down	NA	NA	NA	GO:0008289//lipid binding	GO:0006869//lipid transport	NA	KYP52725.1//Non-specific lipid-transfer protein-like protein At2g13820 family [Cajanus cajan]
Maker00014642	2.00751	Up	-3.07051	Down	NA	NA	GO:0005634//nucleus	NA	GO:0006355//regulation of transcription, DNA-templated;GO:0009734//auxin-activated signaling pathway;GO:0006351//transcription, DNA-templated	K14484//auxin-responsive protein IAA	XP_018833207.1//PREDICTED: auxin-responsive protein IAA27-like [Juglans regia];NP_001240013.1//uncharacterized protein LOC100804423 [Glycine max]
Maker00017299	-1.79969	Down	2.91659	Up	1.12106	Up	GO:0005634//nucleus	GO:0003677//DNA binding;GO:0003700//DNA binding transcription factor activity	GO:0006351//transcription, DNA-templated	K12900//FUS-interacting serine-arginine-rich protein 1;K09286//EREBP-like factor	KOM24861.1//hypothetical protein LR48_Vigan2287s000100 [Vigna angularis]
Maker00024383	1.47418	Up	-4.9578	Down	-3.18284	Down	NA	GO:0004190//aspartic-type endopeptidase activity	GO:0006508//proteolysis;GO:0030163//protein catabolic process	K01379//cathepsin D [EC:3.4.23.5];K01381//saccharopepsin [EC:3.4.23.25]	XP_020203915.1//aspartyl protease AED3-like [Cajanus cajan]
Maker00024408	1.97136	Up	-2.3565	Down	NA	NA	NA	GO:0043531//ADP binding;GO:0005524//ATP binding;GO:0004672//protein kinase activity	GO:0006952//defense response	K13459//disease resistance protein RPS2	XP_012571058.1//PREDICTED: uncharacterized protein LOC101507086 [Cicer arietinum]
BGI_novel_G002795	1.29174	Up	NA	NA	NA	NA	GO:0016021//integral component of membrane	GO:0005524//ATP binding;GO:0004672//protein kinase activity;GO:0030247//polysaccharide binding	NA	K04733//interleukin-1 receptor-associated kinase 4 [EC:2.7.11.1]	XP_004498487.1//PREDICTED: G-type lectin S-receptor-like serine/threonine-protein kinase B120 [Cicer arietinum]
BGI_novel_G001591	-2.64768	Down	NA	NA	NA	NA	NA	GO:0043531//ADP binding	GO:0007165//signal transduction	K22038//volume-regulated anion channel	KYP44276.1//TMV resistance protein N [Cajanus cajan]
Maker00011081	1.16327	Up	NA	NA	NA	NA	GO:0031982//vesicle	NA	GO:0006898//receptor-mediated endocytosis	K18626//trichohyalin	XP_003546576.1//PREDICTED: uncharacterized protein LOC100801416 isoform X2 [Glycine max]
BGI_novel_G003217	3.53332	Up	-4.27646	Down	NA	NA	NA	NA	NA	K19519//transforming growth factor-beta-induced protein	XP_003547182.1//PREDICTED: fasciclin-like arabinogalactan protein 11 [Glycine max]
Maker00013947	1.5098	Up	-3.80781	Down	NA	NA	GO:0016021//integral component of membrane	GO:0005524//ATP binding;GO:0004672//protein kinase activity	NA	K04733//interleukin-1 receptor-associated kinase 4 [EC:2.7.11.1]	XP_019452454.1//PREDICTED: receptor protein kinase-like protein At4g34220 isoform X1 [Lupinus angustifolius]
BGI_novel_G002237	1.62815	Up	NA	NA	NA	NA	NA	GO:0008970//phosphatidylcholine 1-acylhydrolase activity	GO:0006629//lipid metabolic process	K00145//N-acetyl-gamma-glutamyl-phosphate reductase [EC:1.2.1.38]	XP_003547164.2//PREDICTED: phospholipase A1-II 1-like [Glycine max]
Maker00009187	1.26632	Up	NA	NA	NA	NA	GO:0005634//nucleus	GO:0003677//DNA binding	GO:0010452//histone H3-K36 methylation;GO:0006355//regulation of transcription, DNA-templated;GO:0006351//transcription, DNA-templated;GO:0048579//negative regulation of long-day photoperiodism, flowering;GO:0009266//response to temperature stimulus;GO:1903507//negative regulation of nucleic acid-templated transcription;GO:0009740//gibberellic acid mediated signaling pathway	K14491//two-component response regulator ARR-B family;K03921//acyl-[acyl-carrier-protein] desaturase [EC:1.14.19.2 1.14.19.11 1.14.19.26]	XP_017422950.1//PREDICTED: myb family transcription factor EFM [Vigna angularis];XP_007013309.1//PREDICTED: myb family transcription factor EFM [Theobroma cacao]
Maker00003196	1.80933	Up	-3.03502	Down	NA	NA	NA	GO:0004857//enzyme inhibitor activity	NA	K07575//PUA domain protein	NP_001235392.1//uncharacterized protein LOC100306461 precursor [Glycine max]
Maker00007934	3.12687	Up	-4.57034	Down	NA	NA	GO:0005576//extracellular region	GO:0045735//nutrient reservoir activity;GO:0030145//manganese ion binding	NA	K00384//thioredoxin reductase (NADPH) [EC:1.8.1.9]	XP_007145079.1//hypothetical protein PHAVU_007G207800g [Phaseolus vulgaris]
BGI_novel_G000173	2.71231	Up	-3.17893	Down	NA	NA	NA	GO:0004252//serine-type endopeptidase activity	NA	K12619//5'-3' exoribonuclease 2 [EC:3.1.13.-];K13199//plasminogen activator inhibitor 1 RNA-binding protein;K15333//tRNA guanosine-2'-O-methyltransferase [EC:2.1.1.34]	XP_003545195.2//PREDICTED: subtilisin-like protease Glyma18g48580 [Glycine max]
BGI_novel_G000863	1.68384	Up	-2.42836	Down	NA	NA	NA	GO:0016747//transferase activity, transferring acyl groups other than amino-acyl groups	GO:0009058//biosynthetic process	K00660//chalcone synthase [EC:2.3.1.74]	XP_003553986.1//PREDICTED: chalcone synthase J-like [Glycine max]
Maker00020429	1.65116	Up	-4.67777	Down	-2.97429	Down	GO:0016021//integral component of membrane	NA	NA	NA	XP_007153505.1//hypothetical protein PHAVU_003G041400g [Phaseolus vulgaris]
Maker00008276	2.04904	Up	-3.20478	Down	NA	NA	GO:0009705//plant-type vacuole membrane;GO:0016021//integral component of membrane;GO:0005886//plasma membrane	GO:0015112//nitrate transmembrane transporter activity;GO:0005215//transporter activity	GO:0055085//transmembrane transport;GO:0071249//cellular response to nitrate;GO:0015706//nitrate transport	K02575//MFS transporter, NNP family, nitrate/nitrite transporter	KDO55197.1//hypothetical protein CISIN_1g014301mg [Citrus sinensis];XP_020980850.1//high affinity nitrate transporter 2.7 [Arachis duranensis]
Maker00012817	1.60796	Up	-1.50891	Down	NA	NA	NA	GO:0061630//ubiquitin protein ligase activity;GO:0016874//ligase activity	GO:0043161//proteasome-mediated ubiquitin-dependent protein catabolic process;GO:0048437//floral organ development	K19045//E3 ubiquitin-protein ligase BIG BROTHER and related proteins [EC:2.3.2.27]	XP_004507101.1//PREDICTED: E3 ubiquitin ligase BIG BROTHER-like [Cicer arietinum]
Maker00019577	1.93302	Up	-5.39755	Down	-3.04155	Down	NA	GO:0008289//lipid binding	GO:0006869//lipid transport	NA	XP_015893514.1//PREDICTED: non-specific lipid-transfer protein-like protein At2g13820 isoform X1 [Ziziphus jujuba]
Maker00000370	3.20288	Up	-3.684	Down	NA	NA	NA	NA	NA	K11855//ubiquitin carboxyl-terminal hydrolase 36/42 [EC:3.4.19.12]	KHN26905.1//14 kDa proline-rich protein DC2.15 [Glycine soja]
BGI_novel_G000615	3.02829	Up	-4.03074	Down	NA	NA	NA	GO:0046872//metal ion binding;GO:0051213//dioxygenase activity	NA	K05277//leucoanthocyanidin dioxygenase [EC:1.14.11.19]	XP_003611189.1//leucoanthocyanidin dioxygenase-like protein [Medicago truncatula]
Maker00018132	2.49383	Up	-1.91678	Down	NA	NA	NA	GO:0030246//carbohydrate binding;GO:0016787//hydrolase activity	NA	K14641//apyrase [EC:3.6.1.5]	XP_019457419.1//PREDICTED: nucleoside-triphosphatase-like [Lupinus angustifolius]
Maker00013239	2.06592	Up	-1.79897	Down	NA	NA	NA	GO:0016301//kinase activity	NA	K13420//LRR receptor-like serine/threonine-protein kinase FLS2 [EC:2.7.11.1]	XP_020211682.1//DNA damage-repair/toleration protein DRT100-like [Cajanus cajan]
Maker00010425	1.46958	Up	-1.99799	Down	NA	NA	NA	NA	NA	K10534//nitrate reductase (NAD(P)H) [EC:1.7.1.1 1.7.1.2 1.7.1.3]	KHN04454.1//Cytochrome b5 [Glycine soja]
Maker00011665	1.34619	Up	-2.95474	Down	-1.53795	Down	NA	GO:0046872//metal ion binding;GO:0051213//dioxygenase activity;GO:0016491//oxidoreductase activity	NA	K05277//leucoanthocyanidin dioxygenase [EC:1.14.11.19]	XP_016201997.1//leucoanthocyanidin dioxygenase [Arachis ipaensis]
Maker00005776	1.47841	Up	-3.38634	Down	-1.86621	Down	GO:0005856//cytoskeleton	GO:0003779//actin binding	GO:0030036//actin cytoskeleton organization	K01595//phosphoenolpyruvate carboxylase [EC:4.1.1.31]	XP_007134616.1//hypothetical protein PHAVU_010G061900g [Phaseolus vulgaris];KHN33245.1//Protein SCAR2 [Glycine soja]
BGI_novel_G002277	1.55837	Up	-3.28639	Down	-1.60492	Down	NA	NA	NA	NA	XP_007161792.1//hypothetical protein PHAVU_001G098500g [Phaseolus vulgaris]
Maker00002231	-2.02374	Down	NA	NA	-2.67199	Down	NA	GO:0016301//kinase activity	NA	K04733//interleukin-1 receptor-associated kinase 4 [EC:2.7.11.1]	AFK33693.1//unknown [Lotus japonicus]
Maker00002383	-1.06713	Down	2.62163	Up	1.54192	Up	GO:0005739//mitochondrion	GO:0008453//alanine-glyoxylate transaminase activity;GO:0042802//identical protein binding;GO:0008483//transaminase activity;GO:0030170//pyridoxal phosphate binding	NA	K00827//alanine-glyoxylate transaminase / (R)-3-amino-2-methylpropionate-pyruvate transaminase [EC:2.6.1.44 2.6.1.40]	XP_012089723.1//alanine--glyoxylate aminotransferase 2 homolog 2, mitochondrial isoform X2 [Jatropha curcas]
Maker00022741	1.06963	Up	-1.91091	Down	NA	NA	GO:0016021//integral component of membrane	GO:0004190//aspartic-type endopeptidase activity	NA	K00924//kinase [EC:2.7.1.-];K01379//cathepsin D [EC:3.4.23.5];K01381//saccharopepsin [EC:3.4.23.25]	XP_007156198.1//hypothetical protein PHAVU_003G266600g [Phaseolus vulgaris];XP_019421105.1//PREDICTED: aspartyl protease family protein 1 [Lupinus angustifolius]
Maker00004423	1.45909	Up	-3.32164	Down	-1.72403	Down	NA	GO:0016787//hydrolase activity	GO:0006629//lipid metabolic process	K00430//peroxidase [EC:1.11.1.7]	XP_020230102.1//GDSL esterase/lipase At4g10955-like [Cajanus cajan]
Maker00018735	2.07657	Up	-3.19152	Down	NA	NA	NA	GO:0030247//polysaccharide binding	NA	NA	XP_019464021.1//PREDICTED: uncharacterized protein LOC109362587 isoform X2 [Lupinus angustifolius]
Maker00008964	1.86296	Up	-3.80079	Down	-1.80626	Down	NA	GO:0004190//aspartic-type endopeptidase activity	GO:0006508//proteolysis;GO:0030163//protein catabolic process	K01381//saccharopepsin [EC:3.4.23.25]	XP_003523200.1//PREDICTED: aspartic proteinase nepenthesin-1-like [Glycine max]
Maker00009356	1.1823	Up	-1.34454	Down	NA	NA	GO:0005634//nucleus	GO:0003677//DNA binding;GO:0003700//DNA binding transcription factor activity	GO:0006351//transcription, DNA-templated	K09286//EREBP-like factor	XP_014507437.1//PREDICTED: ethylene-responsive transcription factor TINY-like [Vigna radiata var. radiata]
Maker00021677	2.71959	Up	-7.53336	Down	-4.3396	Down	GO:0016021//integral component of membrane	GO:0005215//transporter activity	GO:0006857//oligopeptide transport	K14638//solute carrier family 15 (peptide/histidine transporter), member 3/4	XP_018841004.1//PREDICTED: protein NRT1/ PTR FAMILY 6.2 isoform X2 [Juglans regia];XP_015944815.1//protein NRT1/ PTR FAMILY 6.2 isoform X2 [Arachis duranensis]
Maker00000750	1.16723	Up	NA	NA	NA	NA	GO:0016021//integral component of membrane	GO:0005524//ATP binding;GO:0008553//hydrogen-exporting ATPase activity, phosphorylative mechanism	GO:0006754//ATP biosynthetic process	K01535//H+-transporting ATPase [EC:3.6.3.6]	KHG19606.1//ATPase 5, plasma membrane-type -like protein [Gossypium arboreum];XP_003526452.1//PREDICTED: plasma membrane ATPase 4 isoform X2 [Glycine max];XP_003544641.1//PREDICTED: plasma membrane ATPase 4-like [Glycine max]
Maker00000761	-1.05099	Down	NA	NA	NA	NA	GO:0016020//membrane;GO:0016021//integral component of membrane	GO:0016709//oxidoreductase activity, acting on paired donors, with incorporation or reduction of molecular oxygen, NAD(P)H as one donor, and incorporation of one atom of oxygen;GO:0016705//oxidoreductase activity, acting on paired donors, with incorporation or reduction of molecular oxygen;GO:0020037//heme binding;GO:0005506//iron ion binding;GO:0004497//monooxygenase activity	GO:0044550//secondary metabolite biosynthetic process	K11818//aromatic aldoxime N-monooxygenase [EC:1.14.14.45];K20617//cytochrome P450 family 71 subfamily A	XP_004499226.1//PREDICTED: cytochrome P450 71A1-like [Cicer arietinum];XP_002278387.1//PREDICTED: cytochrome P450 71A1 [Vitis vinifera]
Maker00016563	1.33956	Up	NA	NA	NA	NA	NA	NA	NA	NA	XP_007148284.1//hypothetical protein PHAVU_006G195300g [Phaseolus vulgaris]
Maker00006037	1.81397	Up	-3.26048	Down	NA	NA	GO:0016021//integral component of membrane	GO:0004674//protein serine/threonine kinase activity;GO:0005524//ATP binding	NA	K00924//kinase [EC:2.7.1.-]	XP_017407558.1//PREDICTED: receptor-like protein kinase HSL1 [Vigna angularis]
Maker00018535	-1.07104	Down	NA	NA	-1.87557	Down	GO:0016021//integral component of membrane;GO:0036513//Derlin-1 retrotranslocation complex	GO:0046872//metal ion binding;GO:0044390//ubiquitin-like protein conjugating enzyme binding;GO:1904264//ubiquitin protein ligase activity involved in ERAD pathway	GO:0071712//ER-associated misfolded protein catabolic process;GO:0042787//protein ubiquitination involved in ubiquitin-dependent protein catabolic process	K10666//E3 ubiquitin-protein ligase RNF5 [EC:2.3.2.27]	XP_017431792.1//PREDICTED: E3 ubiquitin-protein ligase RMA1H1-like [Vigna angularis]
Maker00000355	1.02787	Up	NA	NA	NA	NA	NA	GO:0019825//oxygen binding	NA	K02349//DNA polymerase theta [EC:2.7.7.7]	KHN15362.1//Group 2 hemoglobin yjbI [Glycine soja]
Maker00024835	1.46833	Up	-1.96793	Down	NA	NA	GO:0016020//membrane;GO:0016021//integral component of membrane	GO:0016709//oxidoreductase activity, acting on paired donors, with incorporation or reduction of molecular oxygen, NAD(P)H as one donor, and incorporation of one atom of oxygen;GO:0020037//heme binding;GO:0005506//iron ion binding;GO:0052722//fatty acid in-chain hydroxylase activity	GO:0010143//cutin biosynthetic process;GO:0044550//secondary metabolite biosynthetic process	K21995//unsaturated fatty acid epoxidase [EC:1.14.-.-]	XP_008345522.1//PREDICTED: cytochrome P450 77A3-like [Malus domestica]
Maker00008214	-1.44798	Down	NA	NA	-1.39432	Down	NA	NA	NA	K08064//nuclear transcription factor Y, alpha	XP_007028810.2//PREDICTED: nuclear transcription factor Y subunit A-1 [Theobroma cacao]
Maker00012392	1.76013	Up	NA	NA	NA	NA	GO:0005634//nucleus	GO:0003677//DNA binding	GO:0006355//regulation of transcription, DNA-templated;GO:0006351//transcription, DNA-templated	K06236//collagen, type I, alpha;K14491//two-component response regulator ARR-B family	XP_017424137.1//PREDICTED: myb-related protein 2-like [Vigna angularis]
BGI_novel_G002985	3.34338	Up	NA	NA	NA	NA	NA	GO:0005524//ATP binding;GO:0004672//protein kinase activity;GO:0004540//ribonuclease activity	GO:0006397//mRNA processing	K08852//serine/threonine-protein kinase/endoribonuclease IRE1 [EC:2.7.11.1 3.1.26.-]	XP_004512283.1//PREDICTED: serine/threonine-protein kinase/endoribonuclease IRE1a [Cicer arietinum]
Maker00006816	1.24542	Up	NA	NA	NA	NA	NA	NA	NA	NA	XP_019439964.1//PREDICTED: uncharacterized protein LOC109345429 isoform X1 [Lupinus angustifolius]
Maker00004155	-1.47775	Down	1.35912	Up	NA	NA	NA	NA	NA	K12837//splicing factor U2AF 65 kDa subunit;K03857//phosphatidylinositol glycan, class A [EC:2.4.1.198]	XP_019448746.1//PREDICTED: uncharacterized protein LOC109351662 isoform X1 [Lupinus angustifolius];BAT90554.1//hypothetical protein VIGAN_06181800 [Vigna angularis var. angularis]
Maker00017175	1.54765	Up	-1.53328	Down	NA	NA	NA	GO:0003824//catalytic activity	GO:0008152//metabolic process	K01897//long-chain acyl-CoA synthetase [EC:6.2.1.3]	XP_019441273.1//PREDICTED: long chain acyl-CoA synthetase 1 [Lupinus angustifolius]
Maker00003779	1.46	Up	NA	NA	NA	NA	GO:0016021//integral component of membrane	NA	NA	K04077//chaperonin GroEL	XP_003541756.1//PREDICTED: uncharacterized protein At1g08160-like [Glycine max]
Maker00017549	-1.73708	Down	2.77711	Up	NA	NA	GO:0046658//anchored component of plasma membrane	GO:0004553//hydrolase activity, hydrolyzing O-glycosyl compounds;GO:0030247//polysaccharide binding	GO:0005975//carbohydrate metabolic process	K19892//glucan endo-1,3-beta-glucosidase 4 [EC:3.2.1.39];K19891//glucan endo-1,3-beta-glucosidase 1/2/3 [EC:3.2.1.39]	XP_006583915.1//PREDICTED: glucan endo-1,3-beta-glucosidase 14-like isoform X3 [Glycine max]
Maker00000519	1.79009	Up	NA	NA	NA	NA	GO:0016021//integral component of membrane	GO:0005215//transporter activity	NA	K14638//solute carrier family 15 (peptide/histidine transporter), member 3/4	XP_003552142.1//PREDICTED: protein NRT1/ PTR FAMILY 5.1-like [Glycine max]
Maker00024267	-1.05705	Down	-2.58525	Down	-3.02382	Down	NA	NA	NA	K06699//proteasome activator subunit 4;K12472//epidermal growth factor receptor substrate 15	KDP22140.1//hypothetical protein JCGZ_25971 [Jatropha curcas];XP_020215989.1//BURP domain protein RD22 [Cajanus cajan];XP_017409152.1//PREDICTED: BURP domain protein RD22-like [Vigna angularis]
Maker00019164	2.96336	Up	-1.66742	Down	1.37941	Up	GO:0016021//integral component of membrane;GO:0005886//plasma membrane	NA	GO:0008643//carbohydrate transport	K15382//solute carrier family 50 (sugar transporter)	XP_020232894.1//bidirectional sugar transporter SWEET12-like [Cajanus cajan]
Maker00002422	-1.35481	Down	NA	NA	-1.91015	Down	GO:0016021//integral component of membrane	GO:0016705//oxidoreductase activity, acting on paired donors, with incorporation or reduction of molecular oxygen;GO:0020037//heme binding;GO:0005506//iron ion binding;GO:0004497//monooxygenase activity	NA	K17046//protein DEK;K17961//cytochrome P450 family 82 subfamily G polypeptide 1 [EC:1.14.-.-];K11654//SWI/SNF-related matrix-associated actin-dependent regulator of chromatin subfamily A member 5 [EC:3.6.4.-]	XP_019462575.1//PREDICTED: cytochrome P450 82G1-like isoform X1 [Lupinus angustifolius];XP_006586221.1//PREDICTED: uncharacterized protein LOC102663802 [Glycine max]
Maker00013638	1.19421	Up	2.50833	Up	3.66445	Up	NA	GO:0004190//aspartic-type endopeptidase activity	GO:0006508//proteolysis;GO:0030163//protein catabolic process;GO:0006629//lipid metabolic process	K08245//phytepsin [EC:3.4.23.40]	XP_019429923.1//PREDICTED: aspartic proteinase-like [Lupinus angustifolius]
Maker00020403	2.18181	Up	-2.79258	Down	NA	NA	NA	GO:0008725//DNA-3-methyladenine glycosylase activity	GO:0006284//base-excision repair	K01246//DNA-3-methyladenine glycosylase I [EC:3.2.2.20]	KHN37232.1//Putative GMP synthase [glutamine-hydrolyzing] [Glycine soja];XP_020204860.1//uncharacterized protein LOC109790156 [Cajanus cajan]
BGI_novel_G003030	-2.01231	Down	3.21971	Up	NA	NA	GO:0005634//nucleus	GO:0003677//DNA binding	GO:0006355//regulation of transcription, DNA-templated;GO:0006351//transcription, DNA-templated	K12862//pleiotropic regulator 1;K13126//polyadenylate-binding protein;K05941//glutathione gamma-glutamylcysteinyltransferase [EC:2.3.2.15]	AHE80972.1//NAC domain-containing protein [Ammopiptanthus mongolicus]
Maker00005716	1.53376	Up	NA	NA	NA	NA	NA	GO:0008483//transaminase activity;GO:0030170//pyridoxal phosphate binding	NA	K00827//alanine-glyoxylate transaminase / (R)-3-amino-2-methylpropionate-pyruvate transaminase [EC:2.6.1.44 2.6.1.40]	XP_007033596.1//PREDICTED: alanine--glyoxylate aminotransferase 2 homolog 2, mitochondrial [Theobroma cacao]
Maker00018067	1.20294	Up	NA	NA	NA	NA	GO:0016021//integral component of membrane	GO:0004674//protein serine/threonine kinase activity;GO:0005524//ATP binding	NA	K04733//interleukin-1 receptor-associated kinase 4 [EC:2.7.11.1]	XP_012067378.1//receptor-like protein kinase HERK 1 [Jatropha curcas];XP_016162079.1//putative serine/threonine-protein kinase isoform X1 [Arachis ipaensis]
Maker00018727	2.182	Up	-5.06339	Down	NA	NA	GO:0016021//integral component of membrane	GO:0050664//oxidoreductase activity, acting on NAD(P)H, oxygen as acceptor;GO:0004601//peroxidase activity	NA	K13447//respiratory burst oxidase [EC:1.6.3.- 1.11.1.-]	XP_006600576.1//PREDICTED: respiratory burst oxidase homolog protein F-like isoform X1 [Glycine max]
Maker00011744	2.46097	Up	NA	NA	NA	NA	GO:0016021//integral component of membrane	GO:0016705//oxidoreductase activity, acting on paired donors, with incorporation or reduction of molecular oxygen;GO:0020037//heme binding;GO:0005506//iron ion binding;GO:0004497//monooxygenase activity	NA	K20556//cytochrome P450 family 76 subfamily C	XP_004496721.1//PREDICTED: geraniol 8-hydroxylase-like [Cicer arietinum]
BGI_novel_G002019	-1.29766	Down	NA	NA	-1.15755	Down	NA	GO:0004553//hydrolase activity, hydrolyzing O-glycosyl compounds	GO:0005975//carbohydrate metabolic process	K19892//glucan endo-1,3-beta-glucosidase 4 [EC:3.2.1.39];K19891//glucan endo-1,3-beta-glucosidase 1/2/3 [EC:3.2.1.39]	AOX49223.1//beta-1,3-glucanase [Acacia koa]
Maker00010085	-1.96124	Down	NA	NA	NA	NA	GO:0016021//integral component of membrane	GO:0016787//hydrolase activity	GO:0006629//lipid metabolic process	NA	XP_007160860.1//hypothetical protein PHAVU_001G022800g [Phaseolus vulgaris]
BGI_novel_G001387	2.21623	Up	NA	NA	NA	NA	GO:0043231//intracellular membrane-bounded organelle	GO:0003723//RNA binding;GO:0004519//endonuclease activity	GO:0009451//RNA modification	K17964//leucine-rich PPR motif-containing protein, mitochondrial;K14845//RAT1-interacting protein;K17710//pentatricopeptide repeat domain-containing protein 1	XP_020231207.1//pentatricopeptide repeat-containing protein At4g17616 [Cajanus cajan]
Maker00004944	1.91138	Up	-3.54735	Down	NA	NA	NA	NA	NA	NA	XP_020213804.1//uncharacterized protein LOC109798026 [Cajanus cajan]
BGI_novel_G002614	-2.18627	Down	NA	NA	NA	NA	NA	NA	NA	K14638//solute carrier family 15 (peptide/histidine transporter), member 3/4	XP_020205098.1//pentatricopeptide repeat-containing protein At4g33170-like [Cajanus cajan]
Maker00015353	1.26907	Up	-2.55227	Down	NA	NA	NA	NA	NA	NA	XP_020222268.1//protein SIEVE ELEMENT OCCLUSION B-like [Cajanus cajan]
Maker00001278	2.02365	Up	-4.99246	Down	-2.75499	Down	NA	GO:0016298//lipase activity	GO:0006629//lipid metabolic process	K21026//acetylajmaline esterase [EC:3.1.1.80];K10691//E3 ubiquitin-protein ligase UBR4 [EC:2.3.2.27];K01188//beta-glucosidase [EC:3.2.1.21];K00679//phospholipid:diacylglycerol acyltransferase [EC:2.3.1.158];K14209//solute carrier family 36 (proton-coupled amino acid transporter);K10396//kinesin family member 5	KHN09074.1//GDSL esterase/lipase EXL3 [Glycine soja]
Maker00002525	1.30296	Up	-3.99605	Down	-2.70254	Down	NA	NA	NA	NA	KRH71116.1//hypothetical protein GLYMA_02G130500 [Glycine max]
Maker00009201	2.39729	Up	-7.50478	Down	-4.89679	Down	NA	GO:0016788//hydrolase activity, acting on ester bonds	NA	K10691//E3 ubiquitin-protein ligase UBR4 [EC:2.3.2.27];K01188//beta-glucosidase [EC:3.2.1.21];K14209//solute carrier family 36 (proton-coupled amino acid transporter);K00679//phospholipid:diacylglycerol acyltransferase [EC:2.3.1.158];K01206//alpha-L-fucosidase [EC:3.2.1.51]	KHN44743.1//GDSL esterase/lipase [Glycine soja]
Maker00013964	-2.31819	Down	NA	NA	-2.0492	Down	NA	GO:0016301//kinase activity	NA	K00924//kinase [EC:2.7.1.-]	XP_013456865.1//Serine/Threonine kinase, plant-type protein, putative [Medicago truncatula];XP_017435855.1//PREDICTED: uncharacterized protein At4g06744-like [Vigna angularis]
Maker00002992	-1.88043	Down	NA	NA	-3.59689	Down	GO:0005634//nucleus	GO:0003677//DNA binding	GO:0006355//regulation of transcription, DNA-templated;GO:0006351//transcription, DNA-templated	K03094//S-phase kinase-associated protein 1;K13126//polyadenylate-binding protein;K00521//ferric-chelate reductase [EC:1.16.1.7];K16296//serine carboxypeptidase-like clade I [EC:3.4.16.-]	XP_006589457.1//PREDICTED: NAC domain-containing protein 30-like isoform X1 [Glycine max];KHN17084.1//NAC domain-containing protein 7 [Glycine soja]
Maker00012869	1.21173	Up	-2.92083	Down	NA	NA	NA	NA	NA	K04733//interleukin-1 receptor-associated kinase 4 [EC:2.7.11.1]	XP_019454054.1//PREDICTED: osmotin-like protein [Lupinus angustifolius]
BGI_novel_G001242	2.06897	Up	NA	NA	NA	NA	NA	NA	NA	K13993//HSP20 family protein	ABX60218.1//heat shock protein [Ammopiptanthus mongolicus]
Maker00016186	1.36547	Up	-1.8098	Down	NA	NA	NA	NA	NA	K04733//interleukin-1 receptor-associated kinase 4 [EC:2.7.11.1];K03695//ATP-dependent Clp protease ATP-binding subunit ClpB	XP_018809426.1//PREDICTED: transmembrane protein 45B-like [Juglans regia]
Maker00023337	2.13874	Up	NA	NA	2.23207	Up	GO:0016021//integral component of membrane	NA	NA	K04733//interleukin-1 receptor-associated kinase 4 [EC:2.7.11.1]	GAU36625.1//hypothetical protein TSUD_387770 [Trifolium subterraneum];XP_002522091.1//PREDICTED: uncharacterized protein LOC8268902 [Ricinus communis]
Maker00004642	-1.5987	Down	NA	NA	NA	NA	NA	GO:0008080//N-acetyltransferase activity	NA	NA	XP_002525259.1//PREDICTED: probable N-acetyltransferase HLS1 [Ricinus communis]
Maker00013047	1.19117	Up	-4.29059	Down	-2.76487	Down	GO:0009506//plasmodesma;GO:0016021//integral component of membrane;GO:0046658//anchored component of plasma membrane	GO:0004871//signal transducer activity	GO:0006952//defense response	NA	XP_019448863.1//PREDICTED: NDR1/HIN1-like protein 12 [Lupinus angustifolius]
Maker00013587	1.52806	Up	-1.51169	Down	NA	NA	GO:0080085//signal recognition particle, chloroplast targeting;GO:0009507//chloroplast	NA	GO:0009416//response to light stimulus;GO:0045038//protein import into chloroplast thylakoid membrane	K12271//signal recognition particle 43 kDa protein	XP_016187888.1//signal recognition particle 43 kDa protein, chloroplastic [Arachis ipaensis]
Maker00012122	-1.20002	Down	1.68323	Up	NA	NA	GO:0016021//integral component of membrane	NA	NA	K14209//solute carrier family 36 (proton-coupled amino acid transporter);K15015//solute carrier family 32 (vesicular inhibitory amino acid transporter)	KHM99911.1//Lysine histidine transporter 1 [Glycine soja];XP_021689735.1//probable GABA transporter 2 [Hevea brasiliensis]
Maker00010189	1.55448	Up	NA	NA	1.70268	Up	NA	GO:0003677//DNA binding;GO:0003700//DNA binding transcription factor activity;GO:0016987//sigma factor activity	GO:0006352//DNA-templated transcription, initiation	K03093//RNA polymerase sigma factor	XP_020226387.1//RNA polymerase sigma factor sigE, chloroplastic/mitochondrial-like [Cajanus cajan];KYP72129.1//RNA polymerase sigma factor rpoD, partial [Cajanus cajan]
Maker00006043	1.22572	Up	NA	NA	NA	NA	NA	GO:0016788//hydrolase activity, acting on ester bonds	NA	K21026//acetylajmaline esterase [EC:3.1.1.80];K01206//alpha-L-fucosidase [EC:3.2.1.51]	XP_016181487.2//GDSL esterase/lipase At1g28610 [Arachis ipaensis];XP_004485878.1//PREDICTED: GDSL esterase/lipase At1g28610-like [Cicer arietinum]
Maker00011485	1.13825	Up	-4.16109	Down	-2.99453	Down	GO:0016021//integral component of membrane	NA	NA	K11996//adenylyltransferase and sulfurtransferase [EC:2.7.7.80 2.8.1.11]	XP_018826497.1//PREDICTED: uncharacterized protein LOC108995378 [Juglans regia]
Maker00013461	1.87456	Up	-1.51452	Down	NA	NA	NA	NA	NA	NA	XP_017432150.1//PREDICTED: protein EXORDIUM-like 3 [Vigna angularis]
Maker00006549	2.97532	Up	-5.46137	Down	-2.241	Down	GO:0016021//integral component of membrane	GO:0016757//transferase activity, transferring glycosyl groups	NA	K13680//beta-mannan synthase [EC:2.4.1.32]	XP_019456632.1//PREDICTED: glucomannan 4-beta-mannosyltransferase 9-like [Lupinus angustifolius];XP_015898711.1//PREDICTED: glucomannan 4-beta-mannosyltransferase 9 [Ziziphus jujuba]
Maker00000925	2.44491	Up	-4.61937	Down	-2.05868	Down	GO:0005618//cell wall;GO:0005773//vacuole	GO:0004565//beta-galactosidase activity	GO:0005975//carbohydrate metabolic process	K12309//beta-galactosidase [EC:3.2.1.23]	KYP64633.1//Beta-galactosidase 3 [Cajanus cajan];NP_001265904.1//beta-galactosidase 5-like precursor [Cicer arietinum]
Maker00015136	-1.51197	Down	NA	NA	NA	NA	NA	GO:0080123//jasmonate-amino synthetase activity	GO:0009611//response to wounding;GO:0009694//jasmonic acid metabolic process;GO:0009864//induced systemic resistance, jasmonic acid mediated signaling pathway	K14506//jasmonic acid-amino synthetase	XP_017440393.1//PREDICTED: jasmonic acid-amido synthetase JAR1-like [Vigna angularis]
Maker00007389	1.14754	Up	-2.14554	Down	NA	NA	GO:0016021//integral component of membrane	NA	NA	NA	XP_018851158.1//PREDICTED: fasciclin-like arabinogalactan protein 17 [Juglans regia]
Maker00012144	1.24211	Up	NA	NA	NA	NA	GO:0016021//integral component of membrane;GO:0009507//chloroplast	GO:0020037//heme binding;GO:0004601//peroxidase activity;GO:0004130//cytochrome-c peroxidase activity	GO:0006979//response to oxidative stress;GO:0034599//cellular response to oxidative stress;GO:0042744//hydrogen peroxide catabolic process;GO:0000302//response to reactive oxygen species	K00434//L-ascorbate peroxidase [EC:1.11.1.11]	NP_001316714.1//L-ascorbate peroxidase 5 [Solanum lycopersicum];XP_015064203.1//PREDICTED: L-ascorbate peroxidase 3, peroxisomal [Solanum pennellii]
Maker00011549	1.39891	Up	-4.70884	Down	-3.0512	Down	NA	GO:0004190//aspartic-type endopeptidase activity	NA	K01379//cathepsin D [EC:3.4.23.5];K02882//large subunit ribosomal protein L18Ae;K01381//saccharopepsin [EC:3.4.23.25]	XP_019445061.1//PREDICTED: probable aspartyl protease At4g16563 [Lupinus angustifolius];XP_003549914.1//PREDICTED: aspartic proteinase nepenthesin-1 [Glycine max]
Maker00001464	1.78142	Up	-2.75655	Down	NA	NA	NA	GO:0016705//oxidoreductase activity, acting on paired donors, with incorporation or reduction of molecular oxygen;GO:0020037//heme binding;GO:0005506//iron ion binding;GO:0004497//monooxygenase activity	NA	K15401//fatty acid omega-hydroxylase [EC:1.14.-.-]	XP_016166984.1//cytochrome P450 86A1 [Arachis ipaensis]
Maker00005093	1.7011	Up	-3.67024	Down	-1.84088	Down	NA	GO:0003729//mRNA binding;GO:0046872//metal ion binding	NA	K14651//transcription initiation factor TFIID subunit 15;K15407//queuine tRNA-ribosyltransferase subunit QTRTD1 [EC:2.4.2.29];K13098//RNA-binding protein FUS	NP_001236842.1//uncharacterized protein LOC100499847 [Glycine max];XP_015938068.1//RNA-binding protein cabeza [Arachis duranensis]
Maker00016834	-4.23562	Down	3.3878	Up	-2.75346	Down	GO:0005576//extracellular region	GO:0046872//metal ion binding;GO:0020037//heme binding;GO:0004601//peroxidase activity	GO:0006979//response to oxidative stress;GO:0042744//hydrogen peroxide catabolic process	K00430//peroxidase [EC:1.11.1.7]	XP_013468227.1//cationic peroxidase [Medicago truncatula]
Maker00003886	1.9311	Up	-2.32327	Down	NA	NA	GO:0005634//nucleus	GO:0046872//metal ion binding;GO:0003677//DNA binding	NA	K20641//Rho GTPase-activating protein 20;K13415//protein brassinosteroid insensitive 1 [EC:2.7.10.1 2.7.11.1]	XP_020235915.1//squamosa promoter-binding protein 1-like [Cajanus cajan]
Maker00010754	1.16634	Up	-1.00445	Down	NA	NA	GO:0005737//cytoplasm	GO:0008237//metallopeptidase activity;GO:0008270//zinc ion binding;GO:0042277//peptide binding;GO:0070006//metalloaminopeptidase activity	GO:0006508//proteolysis;GO:0043171//peptide catabolic process	K01254//leukotriene-A4 hydrolase [EC:3.3.2.6]	XP_010032239.1//PREDICTED: leukotriene A-4 hydrolase homolog [Eucalyptus grandis]
Maker00000730	1.34834	Up	NA	NA	NA	NA	NA	NA	NA	K00487//trans-cinnamate 4-monooxygenase [EC:1.14.13.11]	AEM63593.1//cinnamate 4-hydroxylase [Leucaena leucocephala]
Maker00008792	1.61852	Up	NA	NA	1.94788	Up	GO:0005887//integral component of plasma membrane	GO:0015116//sulfate transmembrane transporter activity;GO:0008271//secondary active sulfate transmembrane transporter activity	NA	K17469//sulfate transporter 2, low-affinity	KYP45221.1//Sulfate transporter 2.1 [Cajanus cajan];XP_020236940.1//sulfate transporter 2.1-like isoform X1 [Cajanus cajan]
Maker00008097	1.02114	Up	-1.69949	Down	NA	NA	NA	GO:0016788//hydrolase activity, acting on ester bonds	NA	K10396//kinesin family member 5;K01206//alpha-L-fucosidase [EC:3.2.1.51]	XP_003521655.1//PREDICTED: GDSL esterase/lipase At1g09390 isoform X2 [Glycine max]
BGI_novel_G000327	2.23918	Up	NA	NA	NA	NA	NA	NA	NA	K13648//alpha-1,4-galacturonosyltransferase [EC:2.4.1.43]	OIV98524.1//hypothetical protein TanjilG_12110 [Lupinus angustifolius]
Maker00002193	3.26995	Up	-6.87159	Down	NA	NA	GO:0016021//integral component of membrane	NA	NA	NA	KRG99534.1//hypothetical protein GLYMA_18G152400 [Glycine max]
Maker00016026	1.6533	Up	-4.53591	Down	-2.6536	Down	GO:0005576//extracellular region	GO:0046872//metal ion binding;GO:0020037//heme binding;GO:0004601//peroxidase activity	GO:0006979//response to oxidative stress;GO:0042744//hydrogen peroxide catabolic process	K00430//peroxidase [EC:1.11.1.7]	OWM73426.1//hypothetical protein CDL15_Pgr026525 [Punica granatum]
Maker00007904	1.00861	Up	-1.79944	Down	NA	NA	GO:0016021//integral component of membrane	NA	NA	K04716//sphingosine-1-phosphate phosphatase 1 [EC:3.1.3.-]	XP_006604689.1//PREDICTED: lipid phosphate phosphatase delta-like [Glycine max]
Maker00016367	1.10453	Up	-1.14825	Down	NA	NA	GO:0016021//integral component of membrane	NA	NA	NA	KHG09517.1//ftsK [Gossypium arboreum];XP_020221347.1//uncharacterized protein LOC109804020 [Cajanus cajan]
Maker00004530	4.68704	Up	-4.98155	Down	NA	NA	GO:0016021//integral component of membrane	GO:0015238//drug transmembrane transporter activity;GO:0015297//antiporter activity	NA	K03327//multidrug resistance protein, MATE family	XP_016202025.1//protein DETOXIFICATION 56 [Arachis ipaensis]
Maker00004060	2.08105	Up	-3.86117	Down	NA	NA	GO:0016021//integral component of membrane;GO:0000139//Golgi membrane	GO:0047262//polygalacturonate 4-alpha-galacturonosyltransferase activity	GO:0045489//pectin biosynthetic process;GO:0071555//cell wall organization	K20867//galacturonosyltransferase 12/13/14/15 [EC:2.4.1.-]	XP_019437125.1//PREDICTED: probable galacturonosyltransferase 12 [Lupinus angustifolius]
Maker00014394	2.34238	Up	-3.6454	Down	NA	NA	NA	NA	NA	K17098//annexin D	XP_015937120.1//annexin-like protein RJ4 [Arachis duranensis]
Maker00019348	-1.95706	Down	NA	NA	-1.85492	Down	GO:0005737//cytoplasm	GO:0045548//phenylalanine ammonia-lyase activity	GO:0009800//cinnamic acid biosynthetic process;GO:0006559//L-phenylalanine catabolic process	K10775//phenylalanine ammonia-lyase [EC:4.3.1.24]	AFP86474.1//phenylalanine ammonia-lyase, partial [Brassica rapa subsp. chinensis]
Maker00015186	1.61562	Up	NA	NA	NA	NA	NA	NA	NA	K14709//solute carrier family 39 (zinc transporter), member 1/2/3;K21952//CASK-interacting protein	GAU13685.1//hypothetical protein TSUD_347890 [Trifolium subterraneum]
BGI_novel_G003287	2.06967	Up	-1.74338	Down	NA	NA	GO:0016021//integral component of membrane	NA	GO:2000031//regulation of salicylic acid mediated signaling pathway;GO:0031347//regulation of defense response;GO:0071446//cellular response to salicylic acid stimulus	K20175//ankyrin repeat domain-containing protein 27;K15503//serine/threonine-protein phosphatase 6 regulatory ankyrin repeat subunit B;K15502//serine/threonine-protein phosphatase 6 regulatory ankyrin repeat subunit A	KYP73160.1//Ankyrin repeat-containing protein At3g12360 family [Cajanus cajan]
Maker00014077	1.90267	Up	-2.53886	Down	NA	NA	GO:0009507//chloroplast	GO:0008878//glucose-1-phosphate adenylyltransferase activity;GO:0005524//ATP binding	GO:0019252//starch biosynthetic process;GO:0005978//glycogen biosynthetic process	K00975//glucose-1-phosphate adenylyltransferase [EC:2.7.7.27]	KJB32482.1//hypothetical protein B456_005G244900 [Gossypium raimondii];XP_003541029.1//PREDICTED: glucose-1-phosphate adenylyltransferase large subunit 1-like [Glycine max]
Maker00022726	-1.70671	Down	NA	NA	NA	NA	NA	NA	NA	K20892//beta-arabinofuranosyltransferase [EC:2.4.2.-]	XP_020233200.1//beta-arabinofuranosyltransferase RAY1 [Cajanus cajan]
BGI_novel_G000544	2.49221	Up	NA	NA	NA	NA	NA	NA	NA	K17895//GATA-binding protein 3;K21630//GATA-type zinc finger protein 1	XP_020992899.1//GATA transcription factor 11 isoform X1 [Arachis duranensis]
Maker00001142	1.12763	Up	NA	NA	NA	NA	NA	NA	NA	K01953//asparagine synthase (glutamine-hydrolysing) [EC:6.3.5.4]	BAO45866.1//asparagine synthetase [Acacia mangium]
BGI_novel_G002478	2.14008	Up	NA	NA	NA	NA	GO:0016021//integral component of membrane	NA	GO:0055085//transmembrane transport	NA	XP_020535733.1//probable sphingolipid transporter spinster homolog 2 isoform X3 [Jatropha curcas]
Maker00021140	1.02086	Up	NA	NA	1.70738	Up	NA	GO:0005215//transporter activity	NA	K03098//apolipoprotein D and lipocalin family protein	XP_016200082.1//temperature-induced lipocalin-1 [Arachis ipaensis];XP_012071461.1//temperature-induced lipocalin-1 [Jatropha curcas]
Maker00011075	-1.61022	Down	NA	NA	-2.60088	Down	NA	NA	NA	NA	XP_014500176.1//PREDICTED: polygalacturonase QRT3 [Vigna radiata var. radiata]
Maker00004269	1.93755	Up	-1.93842	Down	NA	NA	GO:0016021//integral component of membrane	NA	GO:0055085//transmembrane transport	K00025//malate dehydrogenase [EC:1.1.1.37]	XP_020210870.1//oligopeptide transporter 7-like [Cajanus cajan]
Maker00023380	2.83906	Up	-5.52315	Down	-2.33848	Down	NA	NA	NA	K04733//interleukin-1 receptor-associated kinase 4 [EC:2.7.11.1];K12173//BRCA1-A complex subunit BRE	XP_016186845.1//thaumatin-like protein 1b [Arachis ipaensis];XP_003540838.1//PREDICTED: thaumatin-like protein 1b [Glycine max]
Maker00006092	-1.50278	Down	2.06493	Up	NA	NA	GO:0016021//integral component of membrane	GO:0004970//ionotropic glutamate receptor activity	NA	K05387//glutamate receptor, ionotropic, plant	XP_003541713.1//PREDICTED: glutamate receptor 2.7-like isoform X1 [Glycine max]
Maker00005509	-2.09895	Down	NA	NA	NA	NA	GO:0016021//integral component of membrane	NA	NA	K01193//beta-fructofuranosidase [EC:3.2.1.26]	XP_017407349.1//PREDICTED: putative UPF0481 protein At3g02645 [Vigna angularis]
BGI_novel_G002608	-1.09804	Down	1.09215	Up	NA	NA	NA	NA	NA	K14638//solute carrier family 15 (peptide/histidine transporter), member 3/4	XP_020205098.1//pentatricopeptide repeat-containing protein At4g33170-like [Cajanus cajan]
Maker00017345	1.37053	Up	-1.86035	Down	NA	NA	NA	NA	NA	K08695//anthocyanidin reductase [EC:1.3.1.77];K21102//anthocyanidin reductase [(2S)-flavan-3-ol-forming] [EC:1.3.1.112]	ABC71336.1//anthocyanidin reductase ANR2 [Lotus corniculatus];AJF94633.1//anthocyanidin reductase [Onobrychis viciifolia]
Maker00015832	-2.7184	Down	NA	NA	NA	NA	NA	NA	GO:0006952//defense response;GO:0009607//response to biotic stimulus	K05387//glutamate receptor, ionotropic, plant	XP_020228230.1//pathogenesis-related protein STH-2-like [Cajanus cajan]
Maker00008066	2.26684	Up	-1.32039	Down	1.0175	Up	GO:0016021//integral component of membrane;GO:0005886//plasma membrane	GO:0022857//transmembrane transporter activity;GO:0015171//amino acid transmembrane transporter activity	GO:0080144//amino acid homeostasis;GO:0032973//amino acid export;GO:0043090//amino acid import	K17500//integrin-linked kinase-associated serine/threonine phosphatase 2C [EC:3.1.3.16];K07874//Ras-related protein Rab-1A	XP_019455573.1//PREDICTED: WAT1-related protein At2g37460-like [Lupinus angustifolius];XP_004493899.1//PREDICTED: WAT1-related protein At2g37450-like isoform X2 [Cicer arietinum]
Maker00024519	2.39094	Up	-2.93229	Down	NA	NA	NA	NA	NA	K21952//CASK-interacting protein	XP_016180726.1//vegetative cell wall protein gp1 [Arachis ipaensis]
BGI_novel_G000658	-1.49365	Down	NA	NA	-2.48126	Down	GO:0016020//membrane	GO:0003885//D-arabinono-1,4-lactone oxidase activity;GO:0050660//flavin adenine dinucleotide binding	NA	K00225//L-galactono-1,4-lactone dehydrogenase [EC:1.3.2.3]	XP_020224063.1//L-gulonolactone oxidase 2-like [Cajanus cajan]
Maker00010038	1.12547	Up	-2.20471	Down	NA	NA	GO:0016021//integral component of membrane	GO:0004366//glycerol-3-phosphate O-acyltransferase activity;GO:0016746//transferase activity, transferring acyl groups;GO:0102420//sn-1-glycerol-3-phosphate C16:0-DCA-CoA acyl transferase activity	GO:0008152//metabolic process	K13508//glycerol-3-phosphate acyltransferase [EC:2.3.1.15 2.3.1.198]	XP_010096597.1//Glycerol-3-phosphate acyltransferase 5 [Morus notabilis];XP_015876833.1//PREDICTED: glycerol-3-phosphate acyltransferase 5-like [Ziziphus jujuba]
BGI_novel_G000645	-1.35535	Down	NA	NA	NA	NA	GO:0012505//endomembrane system;GO:0016021//integral component of membrane	GO:0046527//glucosyltransferase activity;GO:0016740//transferase activity	GO:0006664//glycolipid metabolic process	K13667//protein glucosyltransferase [EC:2.4.1.-]	XP_013444864.1//glycosyltransferase family 90 protein [Medicago truncatula]
Maker00022048	-1.76568	Down	NA	NA	-2.12459	Down	NA	NA	NA	K18881//D-lactate dehydratase [EC:4.2.1.130]	XP_019439532.1//PREDICTED: protein DJ-1 homolog D-like [Lupinus angustifolius]
Maker00004684	1.68771	Up	-3.27557	Down	-1.46071	Down	NA	NA	NA	K03006//DNA-directed RNA polymerase II subunit RPB1 [EC:2.7.7.6];K21952//CASK-interacting protein	XP_017441497.1//PREDICTED: lysine-rich arabinogalactan protein 18-like [Vigna angularis]
Maker00023516	2.29494	Up	NA	NA	NA	NA	GO:0016021//integral component of membrane	GO:0005249//voltage-gated potassium channel activity	NA	K21867//potassium channel	AKR53708.1//KAT1-type channel [Ammopiptanthus mongolicus]
Maker00005200	1.17048	Up	-2.82341	Down	-1.60481	Down	GO:0016021//integral component of membrane	GO:0016705//oxidoreductase activity, acting on paired donors, with incorporation or reduction of molecular oxygen;GO:0020037//heme binding;GO:0005506//iron ion binding;GO:0004497//monooxygenase activity	NA	K20619//cytochrome P450 family 78 subfamily A	XP_020223581.1//cytochrome P450 78A3-like [Cajanus cajan]
Maker00004919	1.64808	Up	NA	NA	NA	NA	GO:0016021//integral component of membrane;GO:0005886//plasma membrane	GO:0051536//iron-sulfur cluster binding	NA	K14313//nuclear pore complex protein Nup53	XP_020228106.1//CASP-like protein 3A1 [Cajanus cajan]
Maker00005062	1.46898	Up	NA	NA	NA	NA	GO:0005634//nucleus	GO:0003677//DNA binding	GO:0006355//regulation of transcription, DNA-templated;GO:0006351//transcription, DNA-templated	K12133//MYB-related transcription factor LHY	XP_003528756.1//PREDICTED: protein LHY isoform X1 [Glycine max];KYP72010.1//Myb-like protein G [Cajanus cajan]
BGI_novel_G001011	2.17805	Up	-5.40635	Down	-3.11058	Down	NA	NA	GO:0006869//lipid transport	NA	XP_004512892.1//PREDICTED: non-specific lipid-transfer protein 2 [Cicer arietinum]
BGI_novel_G000257	-1.93619	Down	NA	NA	-2.39675	Down	NA	NA	NA	K09753//cinnamoyl-CoA reductase [EC:1.2.1.44]	XP_018839732.1//PREDICTED: cinnamoyl-CoA reductase 1-like [Juglans regia]
Maker00017711	1.58765	Up	-1.41623	Down	NA	NA	GO:0016021//integral component of membrane	GO:0005524//ATP binding;GO:0042626//ATPase activity, coupled to transmembrane movement of substances	NA	K05658//ATP-binding cassette, subfamily B (MDR/TAP), member 1 [EC:3.6.3.44]	XP_011466258.1//PREDICTED: ABC transporter B family member 15-like [Fragaria vesca subsp. vesca];XP_017407154.1//PREDICTED: ABC transporter B family member 15-like [Vigna angularis];EOY03300.1//ABC transporter family protein isoform 2 [Theobroma cacao]
BGI_novel_G000449	2.23516	Up	NA	NA	NA	NA	GO:0009505//plant-type cell wall	GO:0052692//raffinose alpha-galactosidase activity	GO:0005975//carbohydrate metabolic process	K07407//alpha-galactosidase [EC:3.2.1.22]	KRH34285.1//hypothetical protein GLYMA_10G174600 [Glycine max]
Maker00008039	2.53969	Up	NA	NA	4.25668	Up	NA	GO:0016787//hydrolase activity	GO:0008152//metabolic process;GO:0009056//catabolic process	K14493//gibberellin receptor GID1 [EC:3.-.-.-]	XP_003554498.1//PREDICTED: probable carboxylesterase 15 [Glycine max]
Maker00017544	-1.15516	Down	NA	NA	-2.10249	Down	GO:0072686//mitotic spindle;GO:0005634//nucleus;GO:0005737//cytoplasm	GO:0004197//cysteine-type endopeptidase activity	GO:0051307//meiotic chromosome separation	K02365//separase [EC:3.4.22.49]	XP_006585469.1//PREDICTED: separase-like isoform X1 [Glycine max];KRH10453.1//hypothetical protein GLYMA_15G048100 [Glycine max]
Maker00000684	-1.54172	Down	NA	NA	NA	NA	GO:0005634//nucleus	NA	NA	K22377;K03539//ribonuclease P/MRP protein subunit RPP1 [EC:3.1.26.5];K19720//collagen, type III, alpha	XP_017422490.1//PREDICTED: uncharacterized protein LOC108331962 isoform X1 [Vigna angularis];XP_019426100.1//PREDICTED: uncharacterized protein LOC109334668 isoform X1 [Lupinus angustifolius];XP_012567858.1//PREDICTED: uncharacterized protein LOC101491980 isoform X2 [Cicer arietinum]
Maker00011420	1.19561	Up	NA	NA	NA	NA	NA	NA	NA	K03006//DNA-directed RNA polymerase II subunit RPB1 [EC:2.7.7.6];K00430//peroxidase [EC:1.11.1.7]	XP_016201673.1//lysine-rich arabinogalactan protein 18 [Arachis ipaensis]
Maker00000162	1.10576	Up	NA	NA	NA	NA	GO:0016020//membrane;GO:0016021//integral component of membrane	GO:0004630//phospholipase D activity;GO:0005509//calcium ion binding;GO:0070290//N-acylphosphatidylethanolamine-specific phospholipase D activity;GO:0005215//transporter activity	GO:0046470//phosphatidylcholine metabolic process;GO:0016042//lipid catabolic process;GO:0055085//transmembrane transport	K01115//phospholipase D1/2 [EC:3.1.4.4]	OIW14802.1//hypothetical protein TanjilG_05423 [Lupinus angustifolius];XP_003523254.1//PREDICTED: phospholipase D delta-like [Glycine max];XP_003603840.2//MFS transporter [Medicago truncatula]
Maker00017154	1.96149	Up	NA	NA	NA	NA	NA	NA	NA	NA	XP_021649323.1//uncharacterized protein LOC110641793 [Hevea brasiliensis]
Maker00023719	1.2999	Up	-2.47379	Down	NA	NA	GO:0005634//nucleus	GO:0043565//sequence-specific DNA binding	GO:0006355//regulation of transcription, DNA-templated;GO:0006351//transcription, DNA-templated	K15613//homeobox protein Meis1	KHN32992.1//Homeobox protein SBH1 [Glycine soja]
Maker00016529	1.75769	Up	-1.88949	Down	NA	NA	NA	GO:0016207//4-coumarate-CoA ligase activity	GO:0008152//metabolic process	K01904//4-coumarate--CoA ligase [EC:6.2.1.12]	NP_001237270.1//4-coumarate:CoA ligase isoenzyme 3 [Glycine max]
Maker00012214	1.78776	Up	NA	NA	2.85756	Up	GO:0016021//integral component of membrane	GO:0008483//transaminase activity;GO:0003824//catalytic activity;GO:0030170//pyridoxal phosphate binding	GO:0009058//biosynthetic process	K14270//aminotransferase	XP_012087060.1//probable aminotransferase ACS10 isoform X1 [Jatropha curcas];XP_010108088.1//putative aminotransferase ACS10 [Morus notabilis];XP_015901591.1//PREDICTED: probable aminotransferase ACS10 [Ziziphus jujuba]
Maker00017262	1.58071	Up	-1.6847	Down	NA	NA	GO:0009331//glycerol-3-phosphate dehydrogenase complex	GO:0051287//NAD binding;GO:0004367//glycerol-3-phosphate dehydrogenase [NAD+] activity	GO:0046168//glycerol-3-phosphate catabolic process;GO:0005975//carbohydrate metabolic process	K00006//glycerol-3-phosphate dehydrogenase (NAD+) [EC:1.1.1.8]	XP_014629229.1//PREDICTED: glycerol-3-phosphate dehydrogenase [NAD(+)] GPDHC1, cytosolic [Glycine max]
Maker00000379	1.7414	Up	-1.49279	Down	NA	NA	GO:0048046//apoplast	GO:0016722//oxidoreductase activity, oxidizing metal ions;GO:0052716//hydroquinone:oxygen oxidoreductase activity;GO:0005507//copper ion binding	GO:0046274//lignin catabolic process;GO:0055114//oxidation-reduction process	K05909//laccase [EC:1.10.3.2]	XP_020214938.1//laccase-4-like [Cajanus cajan];XP_007136212.1//hypothetical protein PHAVU_009G027800g [Phaseolus vulgaris]
Maker00011669	2.7901	Up	-4.20573	Down	NA	NA	GO:0009505//plant-type cell wall;GO:0009506//plasmodesma	GO:0016722//oxidoreductase activity, oxidizing metal ions;GO:0005507//copper ion binding;GO:0016491//oxidoreductase activity	NA	K19791//iron transport multicopper oxidase	XP_020238610.1//L-ascorbate oxidase homolog [Cajanus cajan]
Maker00009774	1.96955	Up	-4.49768	Down	NA	NA	GO:0016021//integral component of membrane	NA	NA	K04077//chaperonin GroEL	GAU31320.1//hypothetical protein TSUD_315300 [Trifolium subterraneum]
Maker00014755	2.39047	Up	NA	NA	NA	NA	GO:0016021//integral component of membrane;GO:0005576//extracellular region	NA	GO:0019953//sexual reproduction	K20628//expansin	NP_001238660.1//cytokinin induced message [Glycine max]
Maker00005881	1.40389	Up	-2.19581	Down	NA	NA	GO:0016021//integral component of membrane	NA	NA	NA	XP_013443753.1//DUF247 domain protein [Medicago truncatula]
Maker00015041	2.52521	Up	NA	NA	NA	NA	NA	NA	NA	NA	XP_020213804.1//uncharacterized protein LOC109798026 [Cajanus cajan]
Maker00016390	-1.24319	Down	NA	NA	-1.65867	Down	GO:0005576//extracellular region	GO:0046872//metal ion binding;GO:0020037//heme binding;GO:0004601//peroxidase activity	GO:0006979//response to oxidative stress;GO:0042744//hydrogen peroxide catabolic process	K00430//peroxidase [EC:1.11.1.7]	XP_007147498.1//hypothetical protein PHAVU_006G129600g [Phaseolus vulgaris]
Maker00014346	1.18372	Up	NA	NA	NA	NA	GO:0005634//nucleus	GO:0003677//DNA binding	GO:0006355//regulation of transcription, DNA-templated;GO:0006351//transcription, DNA-templated	K12741//heterogeneous nuclear ribonucleoprotein A1/A3;K06236//collagen, type I, alpha;K22218//protein-tyrosine sulfotransferase [EC:2.8.2.20];K14491//two-component response regulator ARR-B family	XP_014498685.1//PREDICTED: myb family transcription factor APL isoform X3 [Vigna radiata var. radiata];XP_014498683.1//PREDICTED: myb family transcription factor APL isoform X1 [Vigna radiata var. radiata]
Maker00004050	1.66	Up	-6.44309	Down	-3.92722	Down	NA	GO:0005509//calcium ion binding	NA	K16465//centrin-1;K10840//centrin-2	XP_007149661.1//hypothetical protein PHAVU_005G088600g [Phaseolus vulgaris]
BGI_novel_G000564	1.24989	Up	NA	NA	NA	NA	GO:0048046//apoplast;GO:0005829//cytosol;GO:0009507//chloroplast	GO:0008964//phosphoenolpyruvate carboxylase activity	GO:0006099//tricarboxylic acid cycle;GO:0015977//carbon fixation;GO:0048366//leaf development	K01595//phosphoenolpyruvate carboxylase [EC:4.1.1.31]	XP_015936454.1//phosphoenolpyruvate carboxylase 2 [Arachis duranensis]
Maker00024428	1.89119	Up	NA	NA	NA	NA	GO:0005634//nucleus	GO:0003677//DNA binding;GO:0008270//zinc ion binding	GO:0006355//regulation of transcription, DNA-templated;GO:0006351//transcription, DNA-templated	K08869//aarF domain-containing kinase;K17613//calcineurin-binding protein cabin-1	NP_001235940.1//MYB transcription factor MYB127 [Glycine max]
Maker00012041	1.76462	Up	NA	NA	2.17623	Up	GO:0005829//cytosol	GO:0016791//phosphatase activity	NA	NA	XP_003517475.1//PREDICTED: phosphoglycerate mutase-like protein AT74H [Glycine max]
Maker00010159	1.37828	Up	-5.45541	Down	-4.02583	Down	GO:0016021//integral component of membrane;GO:0005886//plasma membrane	GO:0022857//transmembrane transporter activity;GO:0015171//amino acid transmembrane transporter activity	GO:0080144//amino acid homeostasis;GO:0032973//amino acid export;GO:0043090//amino acid import	K17500//integrin-linked kinase-associated serine/threonine phosphatase 2C [EC:3.1.3.16];K07874//Ras-related protein Rab-1A	XP_016163523.1//WAT1-related protein At4g08290-like isoform X1 [Arachis ipaensis];XP_016182107.1//WAT1-related protein At4g08290 [Arachis ipaensis];XP_003544696.1//PREDICTED: WAT1-related protein At4g08290-like [Glycine max];KHN47036.1//Auxin-induced protein 5NG4-like protein [Glycine soja]
Maker00000820	1.79103	Up	NA	NA	NA	NA	GO:0016021//integral component of membrane	NA	NA	NA	XP_019430583.1//PREDICTED: uncharacterized protein LOC109337943 [Lupinus angustifolius];OMP04351.1//hypothetical protein COLO4_09717 [Corchorus olitorius]
Maker00014841	-1.31576	Down	4.66005	Up	3.31292	Up	GO:0005743//mitochondrial inner membrane;GO:0016021//integral component of membrane	GO:0015171//amino acid transmembrane transporter activity	GO:0055085//transmembrane transport;GO:0006865//amino acid transport;GO:0006839//mitochondrial transport;GO:0006844//acyl carnitine transport	K15109//solute carrier family 25 (mitochondrial carnitine/acylcarnitine transporter), member 20/29	KHN39345.1//Mitochondrial carnitine/acylcarnitine carrier protein CACL, partial [Glycine soja]
Maker00002266	1.99972	Up	-2.10245	Down	NA	NA	NA	NA	NA	K15174//RNA polymerase II-associated factor 1;K02184//formin 2	XP_008451874.1//PREDICTED: glycine-rich protein A3-like [Cucumis melo]
Maker00004626	-2.2761	Down	NA	NA	-4.84156	Down	GO:0016021//integral component of membrane	GO:0015238//drug transmembrane transporter activity;GO:0015297//antiporter activity	NA	K03327//multidrug resistance protein, MATE family	XP_020218306.1//protein DETOXIFICATION 49-like [Cajanus cajan]
Maker00007183	1.43604	Up	NA	NA	NA	NA	NA	GO:0005524//ATP binding;GO:0004672//protein kinase activity	NA	K08286//protein-serine/threonine kinase [EC:2.7.11.-]	XP_014492549.1//PREDICTED: protein kinase PVPK-1-like [Vigna radiata var. radiata]
Maker00015977	1.1392	Up	NA	NA	1.65533	Up	NA	GO:0008422//beta-glucosidase activity;GO:0004553//hydrolase activity, hydrolyzing O-glycosyl compounds	GO:1901657//glycosyl compound metabolic process;GO:0005975//carbohydrate metabolic process	K21362//galactolipid galactosyltransferase [EC:2.4.1.184]	XP_015965808.1//beta-glucosidase-like SFR2, chloroplastic [Arachis duranensis]
Maker00009654	1.2184	Up	NA	NA	NA	NA	GO:0005634//nucleus	GO:0003677//DNA binding	GO:0006355//regulation of transcription, DNA-templated;GO:0006351//transcription, DNA-templated	K05909//laccase [EC:1.10.3.2];K08869//aarF domain-containing kinase;K15397//3-ketoacyl-CoA synthase [EC:2.3.1.199];K09522//DnaJ homolog subfamily C member 2;K17613//calcineurin-binding protein cabin-1	XP_007141798.1//hypothetical protein PHAVU_008G226600g [Phaseolus vulgaris]
Maker00018475	3.97649	Up	-5.9522	Down	NA	NA	GO:0005623//cell	GO:0015035//protein disulfide oxidoreductase activity;GO:0009055//electron transfer activity	GO:0045454//cell redox homeostasis	K03676//glutaredoxin 3	XP_021280579.1//monothiol glutaredoxin-S9 [Herrania umbratica]
BGI_novel_G001640	-2.24291	Down	NA	NA	-2.45969	Down	NA	GO:0009055//electron transfer activity	NA	NA	XP_020219557.1//uncharacterized protein LOC109802532 [Cajanus cajan]
Maker00020354	2.09485	Up	-6.51636	Down	-4.03394	Down	NA	NA	NA	K20628//expansin	XP_016190918.1//expansin-A1 [Arachis ipaensis]
Maker00013330	-1.08833	Down	NA	NA	-1.80178	Down	NA	NA	NA	K00858//NAD+ kinase [EC:2.7.1.23]	XP_016187852.1//protein RETICULATA-RELATED 4, chloroplastic isoform X1 [Arachis ipaensis]
Maker00021622	1.333	Up	-3.47123	Down	-1.951	Down	GO:0016021//integral component of membrane	NA	NA	NA	XP_020227386.1//uncharacterized protein LOC109808691 [Cajanus cajan]
Maker00016839	1.47904	Up	-1.56848	Down	NA	NA	GO:0005618//cell wall	GO:0045330//aspartyl esterase activity;GO:0004857//enzyme inhibitor activity;GO:0030599//pectinesterase activity	GO:0045490//pectin catabolic process;GO:0042545//cell wall modification	K01051//pectinesterase [EC:3.1.1.11]	XP_014517579.1//PREDICTED: putative pectinesterase/pectinesterase inhibitor 22 [Vigna radiata var. radiata]
Maker00013128	6.24474	Up	-6.93444	Down	NA	NA	NA	NA	NA	K04733//interleukin-1 receptor-associated kinase 4 [EC:2.7.11.1];K04730//interleukin-1 receptor-associated kinase 1 [EC:2.7.11.1]	XP_003547182.1//PREDICTED: fasciclin-like arabinogalactan protein 11 [Glycine max]
Maker00024179	2.60979	Up	-5.33022	Down	-2.66497	Down	GO:0016021//integral component of membrane	GO:0008810//cellulase activity	GO:0030245//cellulose catabolic process	K01179//endoglucanase [EC:3.2.1.4]	XP_020220695.1//endoglucanase 25-like [Cajanus cajan];XP_017978831.1//PREDICTED: endoglucanase 25 [Theobroma cacao]
BGI_novel_G000868	1.0073	Up	-1.18714	Down	NA	NA	NA	NA	NA	K17046//protein DEK;K11984//U4/U6.U5 tri-snRNP-associated protein 1	KOM38551.1//hypothetical protein LR48_Vigan03g193300 [Vigna angularis]
Maker00018540	-1.7558	Down	3.97648	Up	1.95875	Up	NA	NA	NA	NA	XP_022142273.1//uncharacterized protein LOC111012434 [Momordica charantia]
Maker00018818	1.57404	Up	NA	NA	NA	NA	NA	GO:0003677//DNA binding	NA	K09422//transcription factor MYB, plant	XP_010091514.1//Myb-related protein 306 [Morus notabilis]
BGI_novel_G000342	3.87249	Up	NA	NA	6.21875	Up	NA	NA	NA	K19090//CRISPR-associated protein Cas5t;K19589//release factor glutamine methyltransferase [EC:2.1.1.297]	XP_016180744.1//pentatricopeptide repeat-containing protein At1g08070, chloroplastic-like [Arachis ipaensis]
Maker00017063	1.2764	Up	NA	NA	NA	NA	NA	NA	NA	NA	XP_019462795.1//PREDICTED: uncharacterized protein LOC109361718 [Lupinus angustifolius];OIW00750.1//hypothetical protein TanjilG_19190 [Lupinus angustifolius]
Maker00003998	1.22894	Up	-1.54366	Down	NA	NA	GO:0016021//integral component of membrane;GO:0005886//plasma membrane	GO:0005524//ATP binding;GO:0004672//protein kinase activity;GO:0004675//transmembrane receptor protein serine/threonine kinase activity	GO:0006468//protein phosphorylation;GO:0007166//cell surface receptor signaling pathway	K04733//interleukin-1 receptor-associated kinase 4 [EC:2.7.11.1]	XP_020214316.1//receptor-like serine/threonine-protein kinase NCRK [Cajanus cajan];XP_014494346.1//PREDICTED: receptor-like serine/threonine-protein kinase NCRK [Vigna radiata var. radiata]
BGI_novel_G000029	3.12374	Up	-3.48101	Down	NA	NA	NA	NA	NA	K06699//proteasome activator subunit 4;K12472//epidermal growth factor receptor substrate 15	XP_003522684.1//PREDICTED: dehydration-responsive protein RD22 [Glycine max]
Maker00006103	1.13653	Up	NA	NA	NA	NA	GO:0016021//integral component of membrane	NA	NA	K19519//transforming growth factor-beta-induced protein	XP_007138874.1//hypothetical protein PHAVU_009G244800g [Phaseolus vulgaris]
Maker00014890	1.45913	Up	-4.32492	Down	-2.83781	Down	GO:0005634//nucleus	GO:0046872//metal ion binding;GO:0003677//DNA binding	NA	K20641//Rho GTPase-activating protein 20;K13415//protein brassinosteroid insensitive 1 [EC:2.7.10.1 2.7.11.1]	XP_003521087.1//PREDICTED: squamosa promoter-binding-like protein 8 [Glycine max];KRH66612.1//hypothetical protein GLYMA_03G117500 [Glycine max]
Maker00008653	1.37435	Up	NA	NA	1.40289	Up	NA	GO:0016491//oxidoreductase activity	NA	K00128//aldehyde dehydrogenase (NAD+) [EC:1.2.1.3]	XP_007155410.1//hypothetical protein PHAVU_003G199100g [Phaseolus vulgaris];XP_020208179.1//aldehyde dehydrogenase family 2 member B4, mitochondrial-like [Cajanus cajan]
Maker00009699	-1.97785	Down	5.94603	Up	3.88827	Up	GO:0016020//membrane;GO:0016021//integral component of membrane	GO:0016709//oxidoreductase activity, acting on paired donors, with incorporation or reduction of molecular oxygen, NAD(P)H as one donor, and incorporation of one atom of oxygen;GO:0016705//oxidoreductase activity, acting on paired donors, with incorporation or reduction of molecular oxygen;GO:0020037//heme binding;GO:0005506//iron ion binding;GO:0004497//monooxygenase activity	GO:0044550//secondary metabolite biosynthetic process	K00512//steroid 17alpha-monooxygenase / 17alpha-hydroxyprogesterone deacetylase [EC:1.14.14.19 1.14.14.32];K23136;K07408//cytochrome P450 family 1 subfamily A polypeptide 1 [EC:1.14.14.1]	KZN02187.1//hypothetical protein DCAR_010941 [Daucus carota subsp. sativus]
BGI_novel_G000989	-1.8323	Down	3.3417	Up	NA	NA	NA	GO:0016491//oxidoreductase activity;GO:0004029//aldehyde dehydrogenase (NAD) activity	NA	K12355//coniferyl-aldehyde dehydrogenase [EC:1.2.1.68]	XP_003525266.1//PREDICTED: aldehyde dehydrogenase family 2 member C4-like [Glycine max]
Maker00002850	1.67069	Up	-5.75168	Down	-3.15867	Down	NA	NA	NA	NA	XP_009339489.1//PREDICTED: uncharacterized protein LOC103931690 isoform X1 [Pyrus x bretschneideri]
Maker00012942	-1.73025	Down	NA	NA	-3.28295	Down	NA	GO:0008061//chitin binding;GO:0004568//chitinase activity	GO:0006032//chitin catabolic process;GO:0016998//cell wall macromolecule catabolic process;GO:0005975//carbohydrate metabolic process	K01183//chitinase [EC:3.2.1.14]	XP_020224332.1//endochitinase PR4 [Cajanus cajan]
Maker00000949	-1.89817	Down	NA	NA	NA	NA	GO:0005576//extracellular region	GO:0046872//metal ion binding;GO:0020037//heme binding;GO:0004601//peroxidase activity	GO:0006979//response to oxidative stress;GO:0042744//hydrogen peroxide catabolic process	K00430//peroxidase [EC:1.11.1.7]	XP_013460386.1//anionic peroxidase swpb3 protein [Medicago truncatula]
Maker00017235	-1.07598	Down	2.54658	Up	1.45601	Up	GO:0005622//intracellular	GO:0004674//protein serine/threonine kinase activity;GO:0005524//ATP binding	GO:0018107//peptidyl-threonine phosphorylation;GO:0007165//signal transduction;GO:0018105//peptidyl-serine phosphorylation;GO:0035556//intracellular signal transduction	K07198//5'-AMP-activated protein kinase, catalytic alpha subunit [EC:2.7.11.11]	XP_012567988.1//PREDICTED: CBL-interacting serine/threonine-protein kinase 12-like [Cicer arietinum]
Maker00017770	1.74621	Up	-2.98767	Down	NA	NA	NA	NA	NA	NA	XP_020233001.1//uncharacterized protein LOC109813248 isoform X2 [Cajanus cajan]
BGI_novel_G000179	3.35745	Up	-5.20749	Down	NA	NA	NA	GO:0004252//serine-type endopeptidase activity	NA	K12619//5'-3' exoribonuclease 2 [EC:3.1.13.-];K13199//plasminogen activator inhibitor 1 RNA-binding protein;K15333//tRNA guanosine-2'-O-methyltransferase [EC:2.1.1.34];K14568//rRNA small subunit pseudouridine methyltransferase Nep1 [EC:2.1.1.260]	XP_015962086.1//subtilisin-like protease Glyma18g48580 [Arachis duranensis]
Maker00023430	2.72416	Up	-4.33844	Down	NA	NA	NA	NA	NA	K10352//myosin heavy chain;K04514;K20283//golgin subfamily A member 4	XP_019424179.1//PREDICTED: filament-like plant protein 7 isoform X3 [Lupinus angustifolius]
Maker00001869	2.01363	Up	NA	NA	NA	NA	NA	NA	NA	K04733//interleukin-1 receptor-associated kinase 4 [EC:2.7.11.1];K19519//transforming growth factor-beta-induced protein;K04730//interleukin-1 receptor-associated kinase 1 [EC:2.7.11.1]	BAE71278.1//putative fasciclin-like arabinogalactan protein FLA2 [Trifolium pratense]
Maker00002319	1.74162	Up	-3.87682	Down	NA	NA	NA	NA	NA	NA	XP_006439228.1//hypothetical protein CICLE_v10022654mg [Citrus clementina]
Maker00011944	2.13342	Up	NA	NA	NA	NA	NA	NA	NA	NA	XP_014505811.1//PREDICTED: uncharacterized protein LOC106765636 [Vigna radiata var. radiata]
Maker00019176	1.8637	Up	-3.50226	Down	NA	NA	GO:0005634//nucleus	GO:0003677//DNA binding	GO:0006355//regulation of transcription, DNA-templated	K04733//interleukin-1 receptor-associated kinase 4 [EC:2.7.11.1];K20043//clathrin coat assembly protein AP180;K09326//homeobox protein OTX1;K16222//Dof zinc finger protein DOF5.5	KHN30912.1//Dof zinc finger protein DOF5.6 [Glycine soja]
Maker00014190	-1.60086	Down	1.97246	Up	NA	NA	GO:0009705//plant-type vacuole membrane;GO:0016021//integral component of membrane	GO:0008514//organic anion transmembrane transporter activity;GO:0022857//transmembrane transporter activity	NA	K08202//MFS transporter, OCT family, solute carrier family 22 (organic cation transporter), member 4/5	AFK48052.1//unknown [Lotus japonicus]
Maker00019284	1.13837	Up	NA	NA	NA	NA	GO:0019898//extrinsic component of membrane;GO:0009654//photosystem II oxygen evolving complex	GO:0005509//calcium ion binding	GO:0015979//photosynthesis	K08901//photosystem II oxygen-evolving enhancer protein 3	XP_021294456.1//oxygen-evolving enhancer protein 3-2, chloroplastic-like [Herrania umbratica]
BGI_novel_G001959	1.4312	Up	-3.68519	Down	-2.06079	Down	NA	NA	NA	K11855//ubiquitin carboxyl-terminal hydrolase 36/42 [EC:3.4.19.12]	NP_001336474.1//AAI_LTSS superfamily protein precursor [Glycine max]
Maker00012348	-2.16626	Down	3.38766	Up	NA	NA	GO:0016021//integral component of membrane	GO:0005355//glucose transmembrane transporter activity;GO:0005351//sugar:proton symporter activity	GO:0035428//hexose transmembrane transport;GO:0046323//glucose import	K08150//MFS transporter, SP family, solute carrier family 2 (myo-inositol transporter), member 13	XP_003598178.1//sugar porter (SP) family MFS transporter [Medicago truncatula]
Maker00017984	2.09401	Up	-1.75985	Down	NA	NA	NA	GO:0032440//2-alkenal reductase [NAD(P)] activity;GO:0008234//cysteine-type peptidase activity	NA	K16290//xylem cysteine proteinase [EC:3.4.22.-];K16292//KDEL-tailed cysteine endopeptidase [EC:3.4.22.-];K17506//protein phosphatase 1L [EC:3.1.3.16];K01365//cathepsin L [EC:3.4.22.15]	XP_002533962.1//PREDICTED: cysteine proteinase RD21a [Ricinus communis];XP_021294080.1//low-temperature-induced cysteine proteinase-like [Herrania umbratica]
Maker00004997	1.3004	Up	-2.44516	Down	NA	NA	NA	NA	NA	K04733//interleukin-1 receptor-associated kinase 4 [EC:2.7.11.1]	XP_019432967.1//PREDICTED: LRR receptor-like serine/threonine-protein kinase GSO1 [Lupinus angustifolius]
Maker00020898	-3.20104	Down	NA	NA	NA	NA	NA	GO:0008483//transaminase activity;GO:0016846//carbon-sulfur lyase activity	NA	K16903//L-tryptophan---pyruvate aminotransferase [EC:2.6.1.99]	XP_020217965.1//L-tryptophan--pyruvate aminotransferase 1 [Cajanus cajan];XP_003519828.1//PREDICTED: L-tryptophan--pyruvate aminotransferase 1-like [Glycine max]
Maker00023924	3.37349	Up	-5.09411	Down	NA	NA	GO:0016021//integral component of membrane	NA	NA	K15503//serine/threonine-protein phosphatase 6 regulatory ankyrin repeat subunit B;K00895//diphosphate-dependent phosphofructokinase [EC:2.7.1.90]	KYP36792.1//Ankyrin repeat-containing protein At3g12360 family, partial [Cajanus cajan];XP_020205315.1//ankyrin repeat-containing protein NPR4-like [Cajanus cajan];XP_003548612.2//PREDICTED: uncharacterized protein LOC100788731 isoform X1 [Glycine max];XP_007131637.1//hypothetical protein PHAVU_011G029900g [Phaseolus vulgaris];XP_020973742.1//ankyrin repeat-containing protein ITN1-like isoform X3…
BGI_novel_G000354	1.44461	Up	-2.25706	Down	NA	NA	NA	NA	NA	K20929//glyoxal/methylglyoxal oxidase [EC:1.2.3.15]	XP_012087985.2//aldehyde oxidase GLOX [Jatropha curcas]
BGI_novel_G001205	1.90929	Up	NA	NA	1.55897	Up	GO:0016021//integral component of membrane	GO:0015098//molybdate ion transmembrane transporter activity	NA	NA	XP_020202144.1//molybdate transporter 1-like [Cajanus cajan]
Maker00017321	-1.14203	Down	NA	NA	-1.47306	Down	GO:0005887//integral component of plasma membrane;GO:0016021//integral component of membrane	GO:0015075//ion transmembrane transporter activity	NA	K02069//putative ABC transport system permease protein	XP_003536972.1//PREDICTED: protein ALUMINUM SENSITIVE 3-like [Glycine max]
Maker00006048	1.38453	Up	NA	NA	NA	NA	GO:0016021//integral component of membrane	GO:0004970//ionotropic glutamate receptor activity	NA	K05387//glutamate receptor, ionotropic, plant	XP_006594565.1//PREDICTED: glutamate receptor 2.7-like isoform X1 [Glycine max]
Maker00015337	-2.26633	Down	NA	NA	NA	NA	NA	GO:0010181//FMN binding;GO:0016491//oxidoreductase activity	NA	K05894//12-oxophytodienoic acid reductase [EC:1.3.1.42]	XP_007020161.2//PREDICTED: putative 12-oxophytodienoate reductase 11 [Theobroma cacao]
Maker00010747	1.71002	Up	-2.99233	Down	NA	NA	NA	NA	NA	K01859//chalcone isomerase [EC:5.5.1.6]	AFA55178.1//chalcone isomerase [Acacia confusa]
Maker00012770	1.74283	Up	NA	NA	NA	NA	GO:0005634//nucleus	GO:0003677//DNA binding	GO:0006355//regulation of transcription, DNA-templated;GO:0006351//transcription, DNA-templated	K14491//two-component response regulator ARR-B family	XP_020229478.1//transcription activator GLK1 isoform X1 [Cajanus cajan];XP_018834281.1//PREDICTED: transcription activator GLK1-like isoform X1 [Juglans regia]
Maker00001265	1.13984	Up	-1.82931	Down	NA	NA	GO:0005622//intracellular	GO:0004435//phosphatidylinositol phospholipase C activity;GO:0004871//signal transducer activity	GO:0016042//lipid catabolic process;GO:0035556//intracellular signal transduction	K05857//phosphatidylinositol phospholipase C, delta [EC:3.1.4.11]	XP_011460955.1//PREDICTED: phosphoinositide phospholipase C 2 [Fragaria vesca subsp. vesca]
Maker00023621	3.63678	Up	-5.96872	Down	NA	NA	NA	GO:0046872//metal ion binding;GO:0016491//oxidoreductase activity	NA	K05933//aminocyclopropanecarboxylate oxidase [EC:1.14.17.4]	XP_004486198.1//PREDICTED: 1-aminocyclopropane-1-carboxylate oxidase [Cicer arietinum]
BGI_novel_G000841	2.02508	Up	-3.59215	Down	NA	NA	GO:0016021//integral component of membrane	GO:0004568//chitinase activity	GO:0006032//chitin catabolic process;GO:0016998//cell wall macromolecule catabolic process;GO:0005975//carbohydrate metabolic process	K20547//basic endochitinase B [EC:3.2.1.14]	XP_012490261.1//PREDICTED: chitinase 10-like [Gossypium raimondii]
Maker00024793	1.25609	Up	-4.42671	Down	-3.09779	Down	GO:0016021//integral component of membrane	GO:0005216//ion channel activity	NA	K05391//cyclic nucleotide gated channel, plant	XP_007032653.2//PREDICTED: cyclic nucleotide-gated ion channel 2 isoform X2 [Theobroma cacao]
Maker00003232	-3.67209	Down	NA	NA	-1.9424	Down	NA	GO:0004805//trehalose-phosphatase activity	GO:0005992//trehalose biosynthetic process	K01087//trehalose 6-phosphate phosphatase [EC:3.1.3.12]	XP_006601938.1//PREDICTED: probable trehalose-phosphate phosphatase J [Glycine max]
BGI_novel_G000996	1.83323	Up	-2.83255	Down	NA	NA	NA	GO:0004190//aspartic-type endopeptidase activity	GO:0009414//response to water deprivation;GO:0009737//response to abscisic acid	K01379//cathepsin D [EC:3.4.23.5];K02882//large subunit ribosomal protein L18Ae;K06002//pepsin A [EC:3.4.23.1]	XP_016203662.1//protein ASPARTIC PROTEASE IN GUARD CELL 1 [Arachis ipaensis]
Maker00001137	-1.09908	Down	NA	NA	NA	NA	NA	GO:0003677//DNA binding;GO:0003700//DNA binding transcription factor activity	NA	K09060//plant G-box-binding factor;K04450//cyclic AMP-dependent transcription factor ATF-2	XP_019417789.1//PREDICTED: basic leucine zipper 9-like isoform X1 [Lupinus angustifolius];XP_003588595.1//BZIP transcription factor [Medicago truncatula]
Maker00001207	1.64984	Up	NA	NA	NA	NA	NA	GO:0004252//serine-type endopeptidase activity	NA	K12619//5'-3' exoribonuclease 2 [EC:3.1.13.-];K13199//plasminogen activator inhibitor 1 RNA-binding protein;K15333//tRNA guanosine-2'-O-methyltransferase [EC:2.1.1.34];K13124//mitogen-activated protein kinase organizer 1;K14568//rRNA small subunit pseudouridine methyltransferase Nep1 [EC:2.1.1.260]	XP_019455862.1//PREDICTED: subtilisin-like protease Glyma18g48580 isoform X2 [Lupinus angustifolius];XP_015962086.1//subtilisin-like protease Glyma18g48580 [Arachis duranensis]
Maker00011339	1.0275	Up	NA	NA	NA	NA	GO:0016021//integral component of membrane	NA	GO:0055085//transmembrane transport	K22048//mechanosensitive ion channel protein 4/5/6/7/8/9/10	XP_009373839.1//PREDICTED: mechanosensitive ion channel protein 10-like [Pyrus x bretschneideri]
Maker00004854	-1.25168	Down	1.67376	Up	NA	NA	NA	GO:0004553//hydrolase activity, hydrolyzing O-glycosyl compounds	GO:0005975//carbohydrate metabolic process	K19891//glucan endo-1,3-beta-glucosidase 1/2/3 [EC:3.2.1.39]	NP_001237271.2//endo-1,3-beta-glucanase precursor [Glycine max]
Maker00015854	1.77977	Up	NA	NA	NA	NA	NA	NA	NA	K02184//formin 2	CAD22154.1//pherophorin-dz1 protein [Volvox carteri f. nagariensis]
Maker00021251	1.51952	Up	NA	NA	NA	NA	NA	NA	NA	K22139//mitochondrial pyruvate carrier 2	XP_016174823.1//early light-induced protein, chloroplastic [Arachis ipaensis]
Maker00022470	1.68119	Up	-3.52156	Down	NA	NA	GO:0016020//membrane;GO:0005618//cell wall;GO:0005576//extracellular region	NA	GO:0009664//plant-type cell wall organization	K20628//expansin	XP_020236737.1//expansin-A10-like [Cajanus cajan]
Maker00010056	1.30885	Up	-2.89306	Down	-1.58118	Down	GO:0016021//integral component of membrane	GO:0016740//transferase activity	NA	K20887//xyloglucan glycosyltransferase 4 [EC:2.4.1.-]	XP_015885099.1//PREDICTED: probable xyloglucan glycosyltransferase 12 [Ziziphus jujuba]
Maker00011685	2.15879	Up	-3.58047	Down	NA	NA	GO:0005634//nucleus	GO:0000981//RNA polymerase II transcription factor activity, sequence-specific DNA binding;GO:0003677//DNA binding;GO:0043565//sequence-specific DNA binding;GO:0044212//transcription regulatory region DNA binding;GO:0001135//transcription factor activity, RNA polymerase II transcription factor recruiting	GO:0006357//regulation of transcription from RNA polymerase II promoter;GO:0030154//cell differentiation	K09422//transcription factor MYB, plant	XP_007155582.1//hypothetical protein PHAVU_003G214300g [Phaseolus vulgaris];XP_017429209.1//PREDICTED: protein ODORANT1 [Vigna angularis]
Maker00018327	1.3886	Up	-1.47401	Down	NA	NA	NA	GO:0016491//oxidoreductase activity	NA	K10767//mRNA N6-methyladenine demethylase [EC:1.14.11.53]	XP_012570037.1//PREDICTED: uncharacterized protein LOC101493086 [Cicer arietinum];KRH67145.1//hypothetical protein GLYMA_03G149900 [Glycine max];XP_020211014.1//uncharacterized protein LOC109795864 [Cajanus cajan]
Maker00004797	-2.30728	Down	2.07856	Up	NA	NA	NA	GO:0046872//metal ion binding;GO:0004722//protein serine/threonine phosphatase activity	NA	K14497//protein phosphatase 2C [EC:3.1.3.16]	XP_003538165.1//PREDICTED: probable protein phosphatase 2C 8 isoform X1 [Glycine max]
Maker00006364	1.71326	Up	NA	NA	NA	NA	GO:0005634//nucleus;GO:0005622//intracellular;GO:0005737//cytoplasm	GO:0043424//protein histidine kinase binding;GO:0004871//signal transducer activity;GO:0009927//histidine phosphotransfer kinase activity	GO:0016310//phosphorylation;GO:0009736//cytokinin-activated signaling pathway;GO:0000160//phosphorelay signal transduction system	K14490//histidine-containing phosphotransfer peotein	GAV63228.1//Hpt domain-containing protein [Cephalotus follicularis];XP_021640567.1//histidine-containing phosphotransfer protein 1-like isoform X2 [Hevea brasiliensis]
Maker00000475	1.30875	Up	NA	NA	NA	NA	NA	NA	NA	K04733//interleukin-1 receptor-associated kinase 4 [EC:2.7.11.1];K06636//structural maintenance of chromosome 1	XP_007146717.1//hypothetical protein PHAVU_006G063700g [Phaseolus vulgaris]
Maker00023228	1.2387	Up	-3.46481	Down	-2.17179	Down	GO:0016020//membrane;GO:0005618//cell wall;GO:0005576//extracellular region	NA	GO:0009664//plant-type cell wall organization	K20628//expansin	XP_020205590.1//expansin-A3-like [Cajanus cajan];XP_014492058.1//PREDICTED: expansin-A4-like [Vigna radiata var. radiata]
[truncated: 3,878 more rows]

## Sheet: Table S7
Table S7. List of GO functional classification of differential expressed genes
[truncated: 49 more rows]

[truncated: 7 more sheets: Table S8, Table 9, Table S10, Table S11, Table S12, Table S13, Table S14]
